# Supplementary material for: Sustainability Impacts of Wood- and Concrete-Based Frame Buildings
Source: MDPI journal article supplement (doi:10.3390/su15021560), 2023-01-13
Supplement: s1 [file s1]

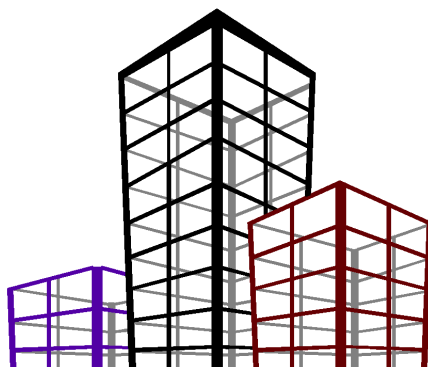

**UAB „KONSTRUKCIJŲ PASAULIS“**

Jonavos g. 260, Kaunas, LT-44131  
 Įm. k.: 304690224. Tel.: +370 (613) 98089;  
 el. p.: k.pazereckas@gmail.com  
 www.konstrukciju-pasaulis.lt

|                               |                         |                                                                                                                   |       |
|-------------------------------|-------------------------|-------------------------------------------------------------------------------------------------------------------|-------|
| <b>Projekto pavadinimas</b>   |                         | <b>Negyvenamasis 2 aukštų surenkamo gelžbetonio konstrukcijų mokslo paskirties pastatas</b>                       |       |
| Užsakovas                     |                         | Miškų institutas, Lietuvos agrarinių ir miškų mokslų centro filialas. Liepų g. 1, Girionių k., LT-53101, Kauno r. |       |
| Statybos rūšis                |                         | Nauja statyba                                                                                                     |       |
| Naudojimo paskirtis           |                         | Negyvenamoji (mokslo paskirties)                                                                                  |       |
| Kategorija                    |                         | Ypatingas                                                                                                         |       |
| Projekto etapas               |                         | Techninis projektas (TP)                                                                                          |       |
| <b>Projekto dalis / žymuo</b> |                         | <b>Konstrukcijų dalis KPRS18/02-TP-SK</b>                                                                         |       |
| UAB Konstrukcijų pasaulis     | Direktorius             | Kęstutis Pažereckas                                                                                               |       |
|                               | Projekto dalies vadovas | Kęstutis Pažereckas                                                                                               | 37603 |
|                               | Projektuotojas          | Kęstutis Pažereckas                                                                                               | 37603 |

Kaunas 2018 m.

**2. DOKUMENTŲ ŽINIARAŠTIS****2.1. Projekto dalies bylos (segtuvo) dokumentų sudėties žiniaraštis**

| Dokumento žymuo      | Lapų sk. | Laida | Dokumento pavadinimas                         | Pastabos |
|----------------------|----------|-------|-----------------------------------------------|----------|
| KPRS18/02-TP-SK-DŽ   | 1        | 0     | Dokumentų sudėties žiniaraštis                |          |
| KPRS18/02-TP-SK-1.1  | 1        | 0     | Polių skaičiuotinių apkrovų planas            |          |
| KPRS18/02-TP-SK-1.2  | 1        | 0     | Polių charakteristinių apkrovų planas         |          |
| KPRS18/02-TP-SK-1.3  | 1        | 0     | Polių pamatų planas                           |          |
| KPRS18/02-TP-SK-1.4  | 1        | 0     | Polių galvenų ir rostverkų planas             |          |
| KPRS18/02-TP-SK-1.5  | 1        | 0     | Polių galvenos                                |          |
| KPRS18/02-TP-SK-1.6  | 1        | 0     | Rostverkai                                    |          |
| KPRS18/02-TP-SK-1.7  | 1        | 0     | Pirmo aukšto planas                           |          |
| KPRS18/02-TP-SK-1.8  | 1        | 0     | Kolonų ir pamato principinis jungimo mazgas   |          |
| KPRS18/02-TP-SK-1.9  | 1        | 0     | Pirmo aukšto perdangos rygelių planas         |          |
| KPRS18/02-TP-SK-1.10 | 1        | 0     | Pirmo aukšto perdangos planas                 |          |
| KPRS18/02-TP-SK-1.11 | 1        | 0     | Antro aukšto planas                           |          |
| KPRS18/02-TP-SK-1.12 | 1        | 0     | Denginio rygelių planas                       |          |
| KPRS18/02-TP-SK-1.13 | 1        | 0     | Denginio plokštės planas                      |          |
| KPRS18/02-TP-SK-1.14 | 1        | 0     | Pjūvis A-A                                    |          |
| KPRS18/02-TP-SK-1.15 | 1        | 0     | Pjūvis B-B                                    |          |
| KPRS18/02-TP-SK-1.16 | 1        | 0     | Atitvarų detalės;<br>Vertikalieji ryšiai VR-1 |          |
| KPRS18/02-TP-SK-1.17 | 1        | 0     | Konstrukcinio modelio vizualizacijos          |          |

|                               |                                                                                                                                |                                                                                                                                                                       |         |                                                                                                                       |  |            |
|-------------------------------|--------------------------------------------------------------------------------------------------------------------------------|-----------------------------------------------------------------------------------------------------------------------------------------------------------------------|---------|-----------------------------------------------------------------------------------------------------------------------|--|------------|
| KVAL.<br>PATV.<br>DOK.<br>NR. | 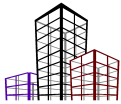                                            | UAB „Konstrukcijų pasaulis“<br>Jonavos g. 260, Kaunas.<br>Įm. k.: 304690224.<br>Tel. +370 (613) 98089<br>el.p. k.pazereckas@gmail.com<br>www.konstrukciju-pasaulis.lt |         | STATINIO PROJEKTO PAVADINIMAS<br>Negyvenamasis 2 aukštų surenkamo gelžbetonio konstrukcijų mokslo paskirties pastatas |  |            |
| 37603                         | PDV                                                                                                                            | K. Pažereckas                                                                                                                                                         | 2018 08 | DOKUMENTO PAVADINIMAS<br>Dokumentų žiniaraštis                                                                        |  | LAIDA      |
| 37603                         | Konstr.                                                                                                                        | K. Pažereckas                                                                                                                                                         | 2018 08 |                                                                                                                       |  | 0          |
| LT                            | UŽSAKOVAS<br>Miškų institutas, Lietuvos agrarinių ir miškų mokslų centro filialas. Liepų g. 1, Girionių k., LT-53101, Kauno r. |                                                                                                                                                                       |         | DOKUMENTO ŽYMUO<br>KPRS18/02-TP-SK-DŽ                                                                                 |  | LAPAS<br>1 |
|                               |                                                                                                                                |                                                                                                                                                                       |         |                                                                                                                       |  | LAPŲ<br>1  |

POLIŲ SKAIČIUOTINIŲ APKROVŲ PLANAS MASTELIS 1:100

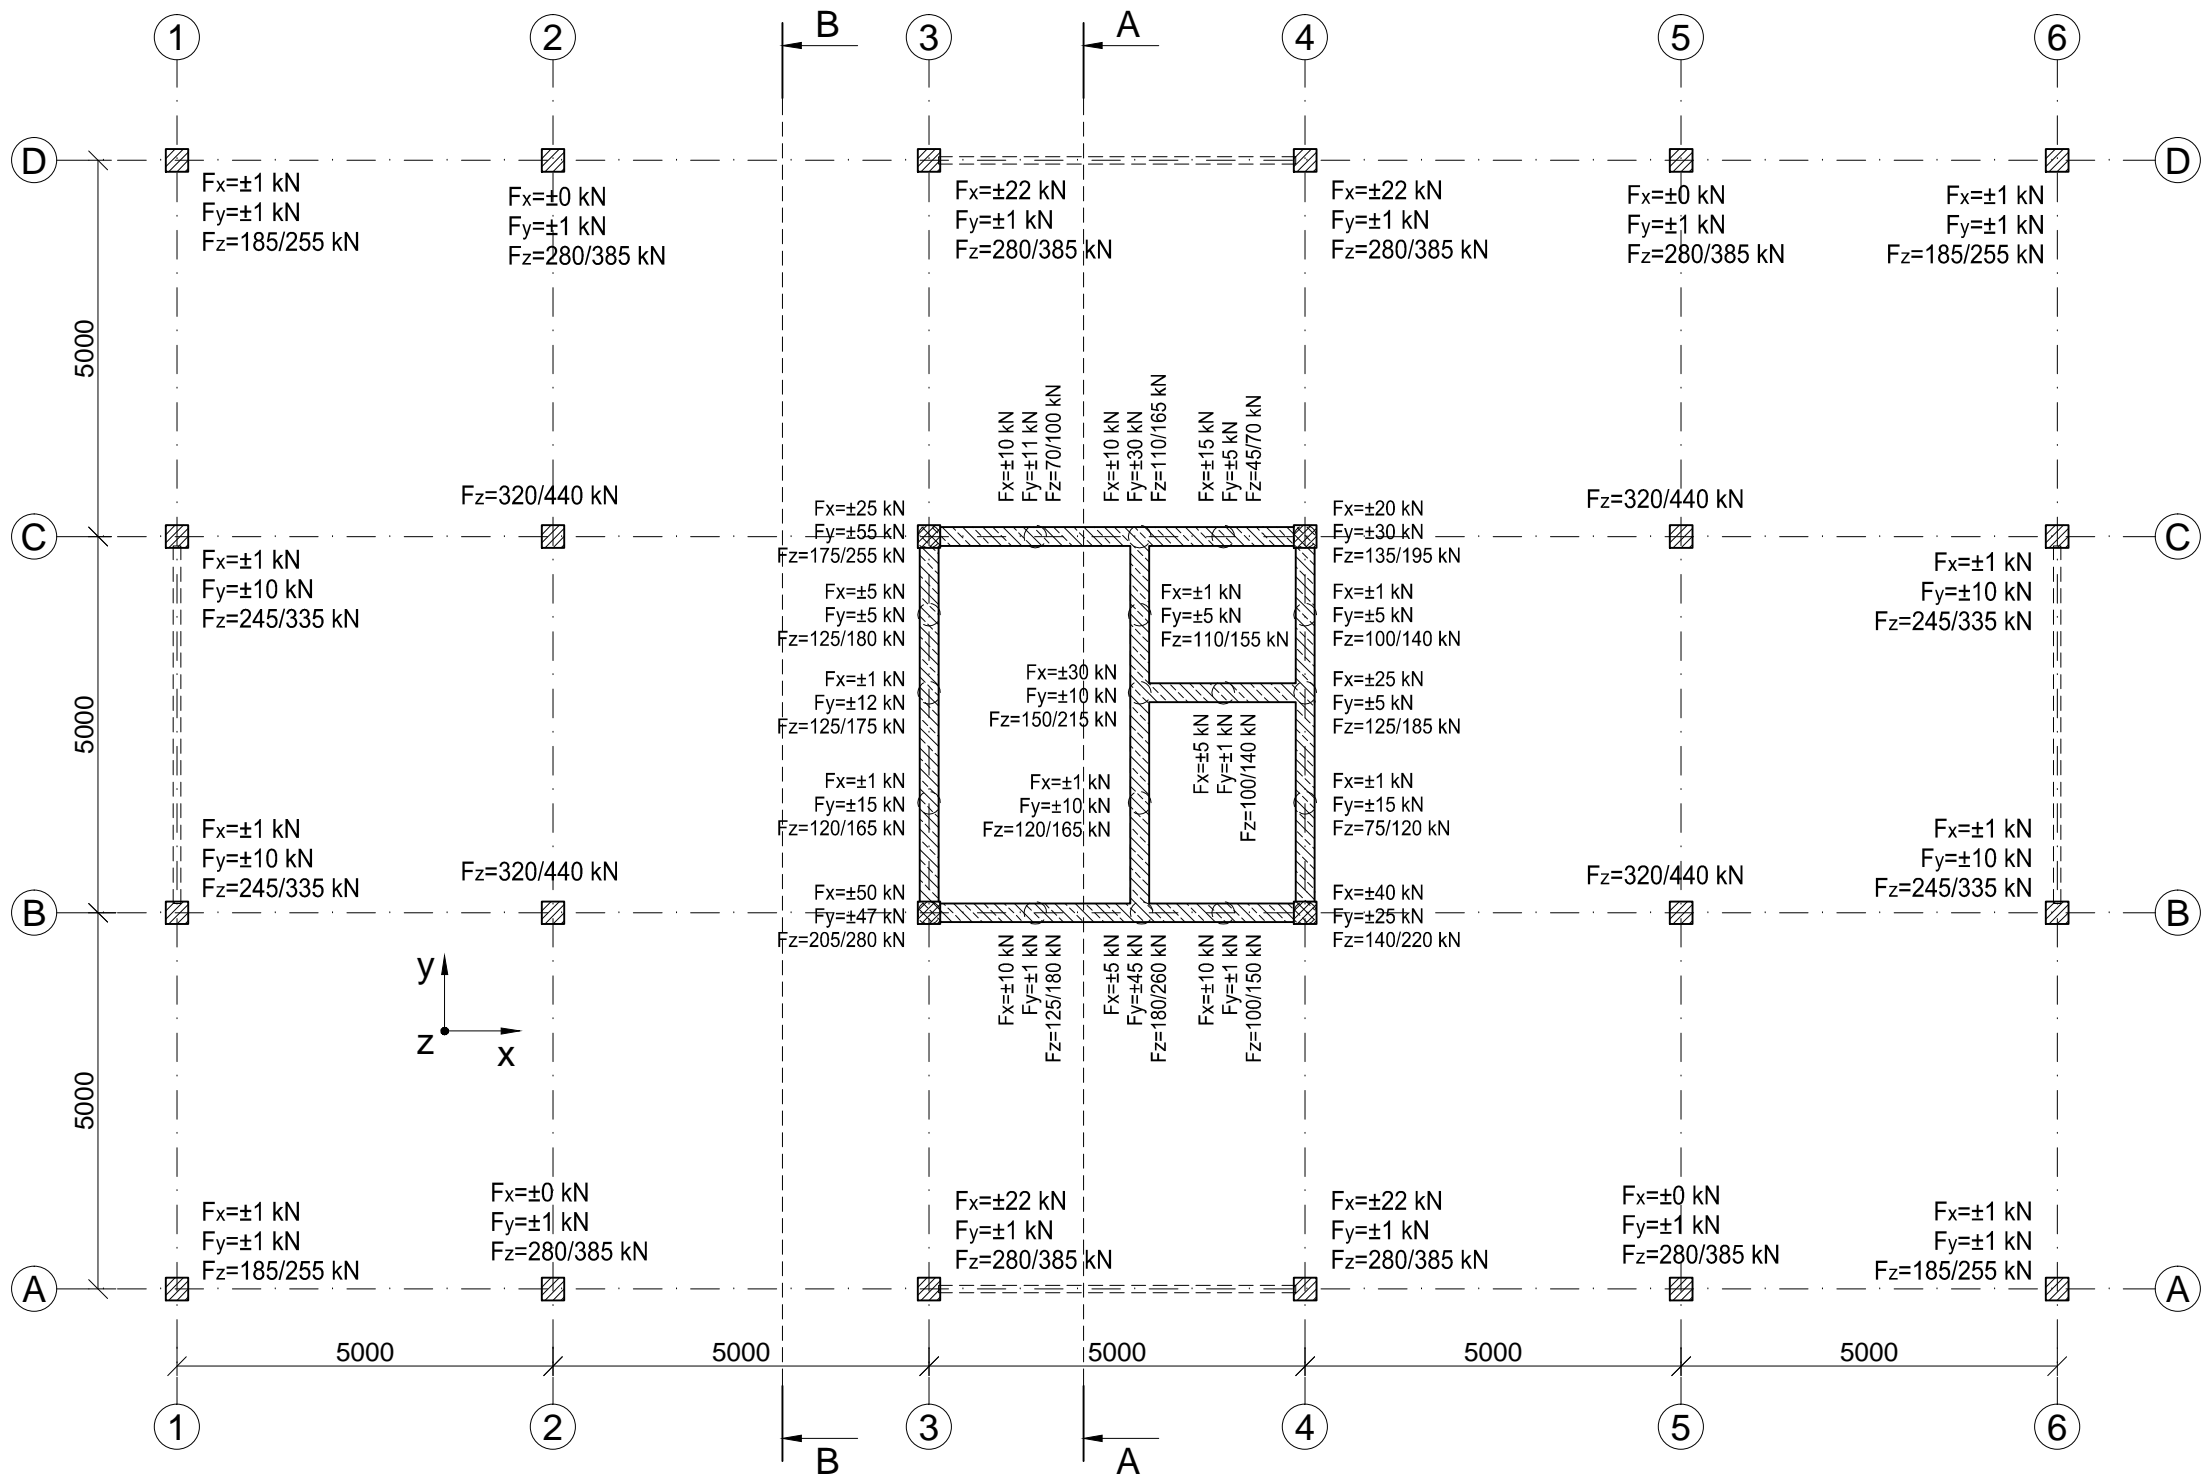

PASTABOS:

1. Skaičiuojamosios pamatų apkrovos apskaičiuotos taikant  $\gamma_g=1.35$  koeficientą nuolatinėms apkrovoms,  $\gamma_q=\gamma_s=\gamma_w=1.30$  kintamoms (naudojimo, sniego ir vėjo) apkrovoms.
2. Polinių pamatų ir polių galvenų svoris neįvertintas.
3. Polinių pamatų skaičiuotiniai svoriai:

- 2,5m poliaus - 6.0 kN
- 4,0m poliaus - 9.5 kN
- 5,0m poliaus - 12.0 kN
- 5,5m poliaus - 13.0 kN
- 6,0m poliaus - 14.5 kN
- 6,5m poliaus - 15.5 kN
- 7,5m poliaus - 18.0 kN
- 9,0m poliaus - 21.5 kN

4. Polių galvenų skaičiuotiniai svoriai:

- PG-1 galvena - 25.0 kN
- PG-2 galvena - 21.5 kN
- PG-3 galvena - 5.0 kN

|                            |                                                                                                                      |                                                                                                                                       |         |                                                                                         |         |                                                             |       |       |
|----------------------------|----------------------------------------------------------------------------------------------------------------------|---------------------------------------------------------------------------------------------------------------------------------------|---------|-----------------------------------------------------------------------------------------|---------|-------------------------------------------------------------|-------|-------|
| KVAL.<br>PATV.<br>DOK. NR. |                                                                                                                      | UAB "Konstrukcijų pasaulis"                                                                                                           |         | STATINIO PROJEKTO PAVADINIMAS                                                           |         |                                                             |       |       |
|                            |                                                                                                                      | Jonavos g. 260, Kaunas<br>Įm. k.: 304690224<br>Tel. +370 (613) 98089<br>El.p.: k.pazereckas@gmail.com<br>www.konstrukciju-pasaulis.lt |         | Negyvenamasis 2 aukštų surenkamo gelžbetonio konstrukcijų<br>mokslo paskirties pastatas |         |                                                             |       |       |
|                            |                                                                                                                      | 37603                                                                                                                                 | PDV     | Kęstutis Pažereckas                                                                     | 2018 08 | DOKUMENTO PAVADINIMAS<br>Polių skaičiuotinių apkrovų planas |       | LAIDA |
|                            |                                                                                                                      | 37603                                                                                                                                 | Konstr. | Kęstutis Pažereckas                                                                     | 2018 08 |                                                             |       | O     |
|                            |                                                                                                                      |                                                                                                                                       |         |                                                                                         |         |                                                             |       |       |
| LT                         | UŽSAKOVAS                                                                                                            |                                                                                                                                       |         | BRĖŽINIO ŽYMUO<br><br>KPRS18/02-TP-SK-1.1                                               |         |                                                             | LAPAS | LAPŲ  |
|                            | Miškų institutas, Lietuvos agrarinių ir miškų mokslų<br>centro filialas, Liepų g. 1, Girionių k., LT-53101, Kauno r. |                                                                                                                                       |         |                                                                                         |         |                                                             | 1     | 1     |
|                            |                                                                                                                      |                                                                                                                                       |         |                                                                                         |         |                                                             |       |       |

POLIŲ CHARAKTERISTINIŲ APKROVŲ PLANAS MASTELIS 1:100

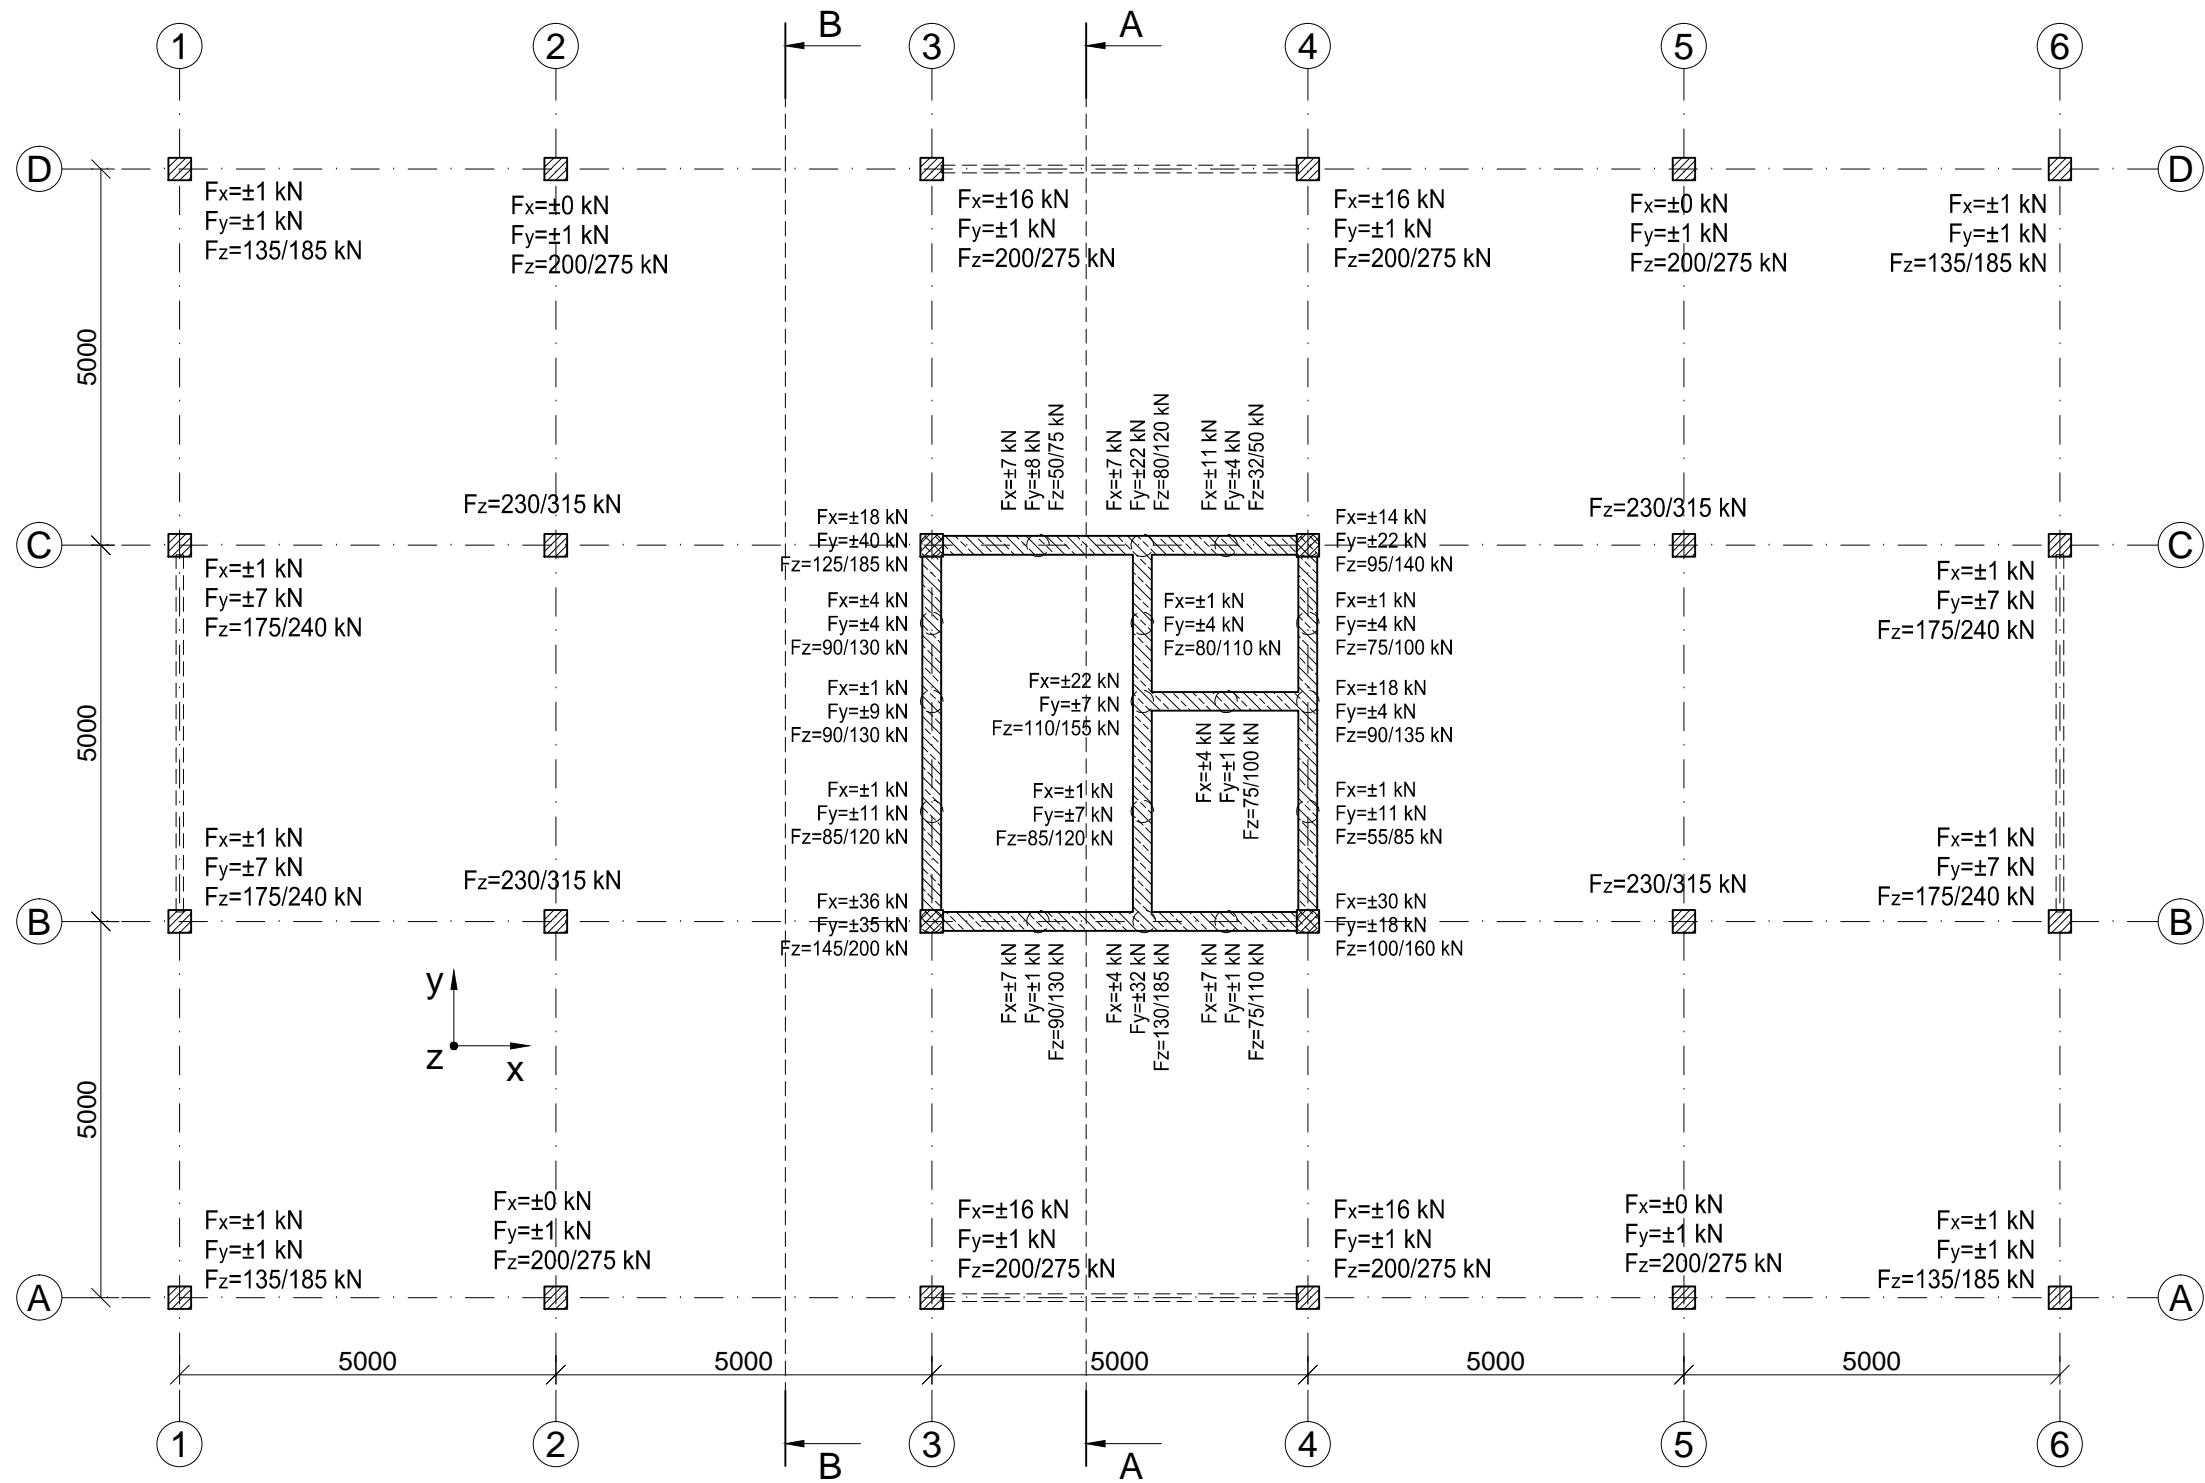

PASTABOS:

1. Charakteristinės pamatų apkrovos apskaičiuotos taikant  $\gamma_g=1.0$  koeficientą nuolatinėms apkrovoms,  $\gamma_q=\gamma_s=\gamma_w=1.00$  kintamoms (naudojimo, sniego ir vėjo) apkrovoms.
2. Polinių pamatų ir polių galvenų svoris neįvertintas.
3. Polinių pamatų charakteristiniai svoriai:
- 2,5m poliaus - 4.5 kN
  - 4,0m poliaus - 7.0 kN
  - 5,0m poliaus - 9.0 kN
  - 5,5m poliaus - 9.5 kN
  - 6,0m poliaus - 10.5 kN
  - 6,5m poliaus - 11.5 kN
  - 7,5m poliaus - 13.5 kN
  - 9,0m poliaus - 16.0 kN
4. Polių galvenų charakteristiniai svoriai:
- PG-1 galvena - 18.5 kN
  - PG-2 galvena - 16.0 kN
  - PG-3 galvena - 4.0 kN

|                            |                                                                                                                                |                                                                                                                                                                      |         |                                                                                                                       |      |   |
|----------------------------|--------------------------------------------------------------------------------------------------------------------------------|----------------------------------------------------------------------------------------------------------------------------------------------------------------------|---------|-----------------------------------------------------------------------------------------------------------------------|------|---|
| KVAL.<br>PATV.<br>DOK. NR. |                                                                                                                                | UAB "Konstrukcijų pasaulis"<br>Jonavos g. 260, Kaunas<br>Įm. k.: 304690224<br>Tel. +370 (613) 98089<br>El.p.: k.pazereckas@gmail.com<br>www.konstrukciju-pasaulis.lt |         | STATINIO PROJEKTO PAVADINIMAS<br>Negyvenamasis 2 aukštų surenkamo gelžbetonio konstrukcijų mokslo paskirties pastatas |      |   |
|                            |                                                                                                                                |                                                                                                                                                                      |         | DOKUMENTO PAVADINIMAS<br>Polių charakteristinių apkrovų planas                                                        |      |   |
| 37603                      | PDV                                                                                                                            | Kęstutis Pažereckas                                                                                                                                                  | 2018 08 | BRĖŽINIO ŽYMUO<br>KPRS18/02-TP-SK-1.2                                                                                 |      |   |
| 37603                      | Konstr.                                                                                                                        | Kęstutis Pažereckas                                                                                                                                                  | 2018 08 |                                                                                                                       |      |   |
| LT                         | UŽSAKOVAS<br>Miškų institutas, Lietuvos agrarinių ir miškų mokslų centro filialas, Liepų g. 1, Girionių k., LT-53101, Kauno r. |                                                                                                                                                                      |         | LAPAS                                                                                                                 | LAPŲ |   |
|                            |                                                                                                                                |                                                                                                                                                                      |         |                                                                                                                       | 1    | 1 |

POLINIŲ PAMATŲ PLANAS MASTELIS 1:100

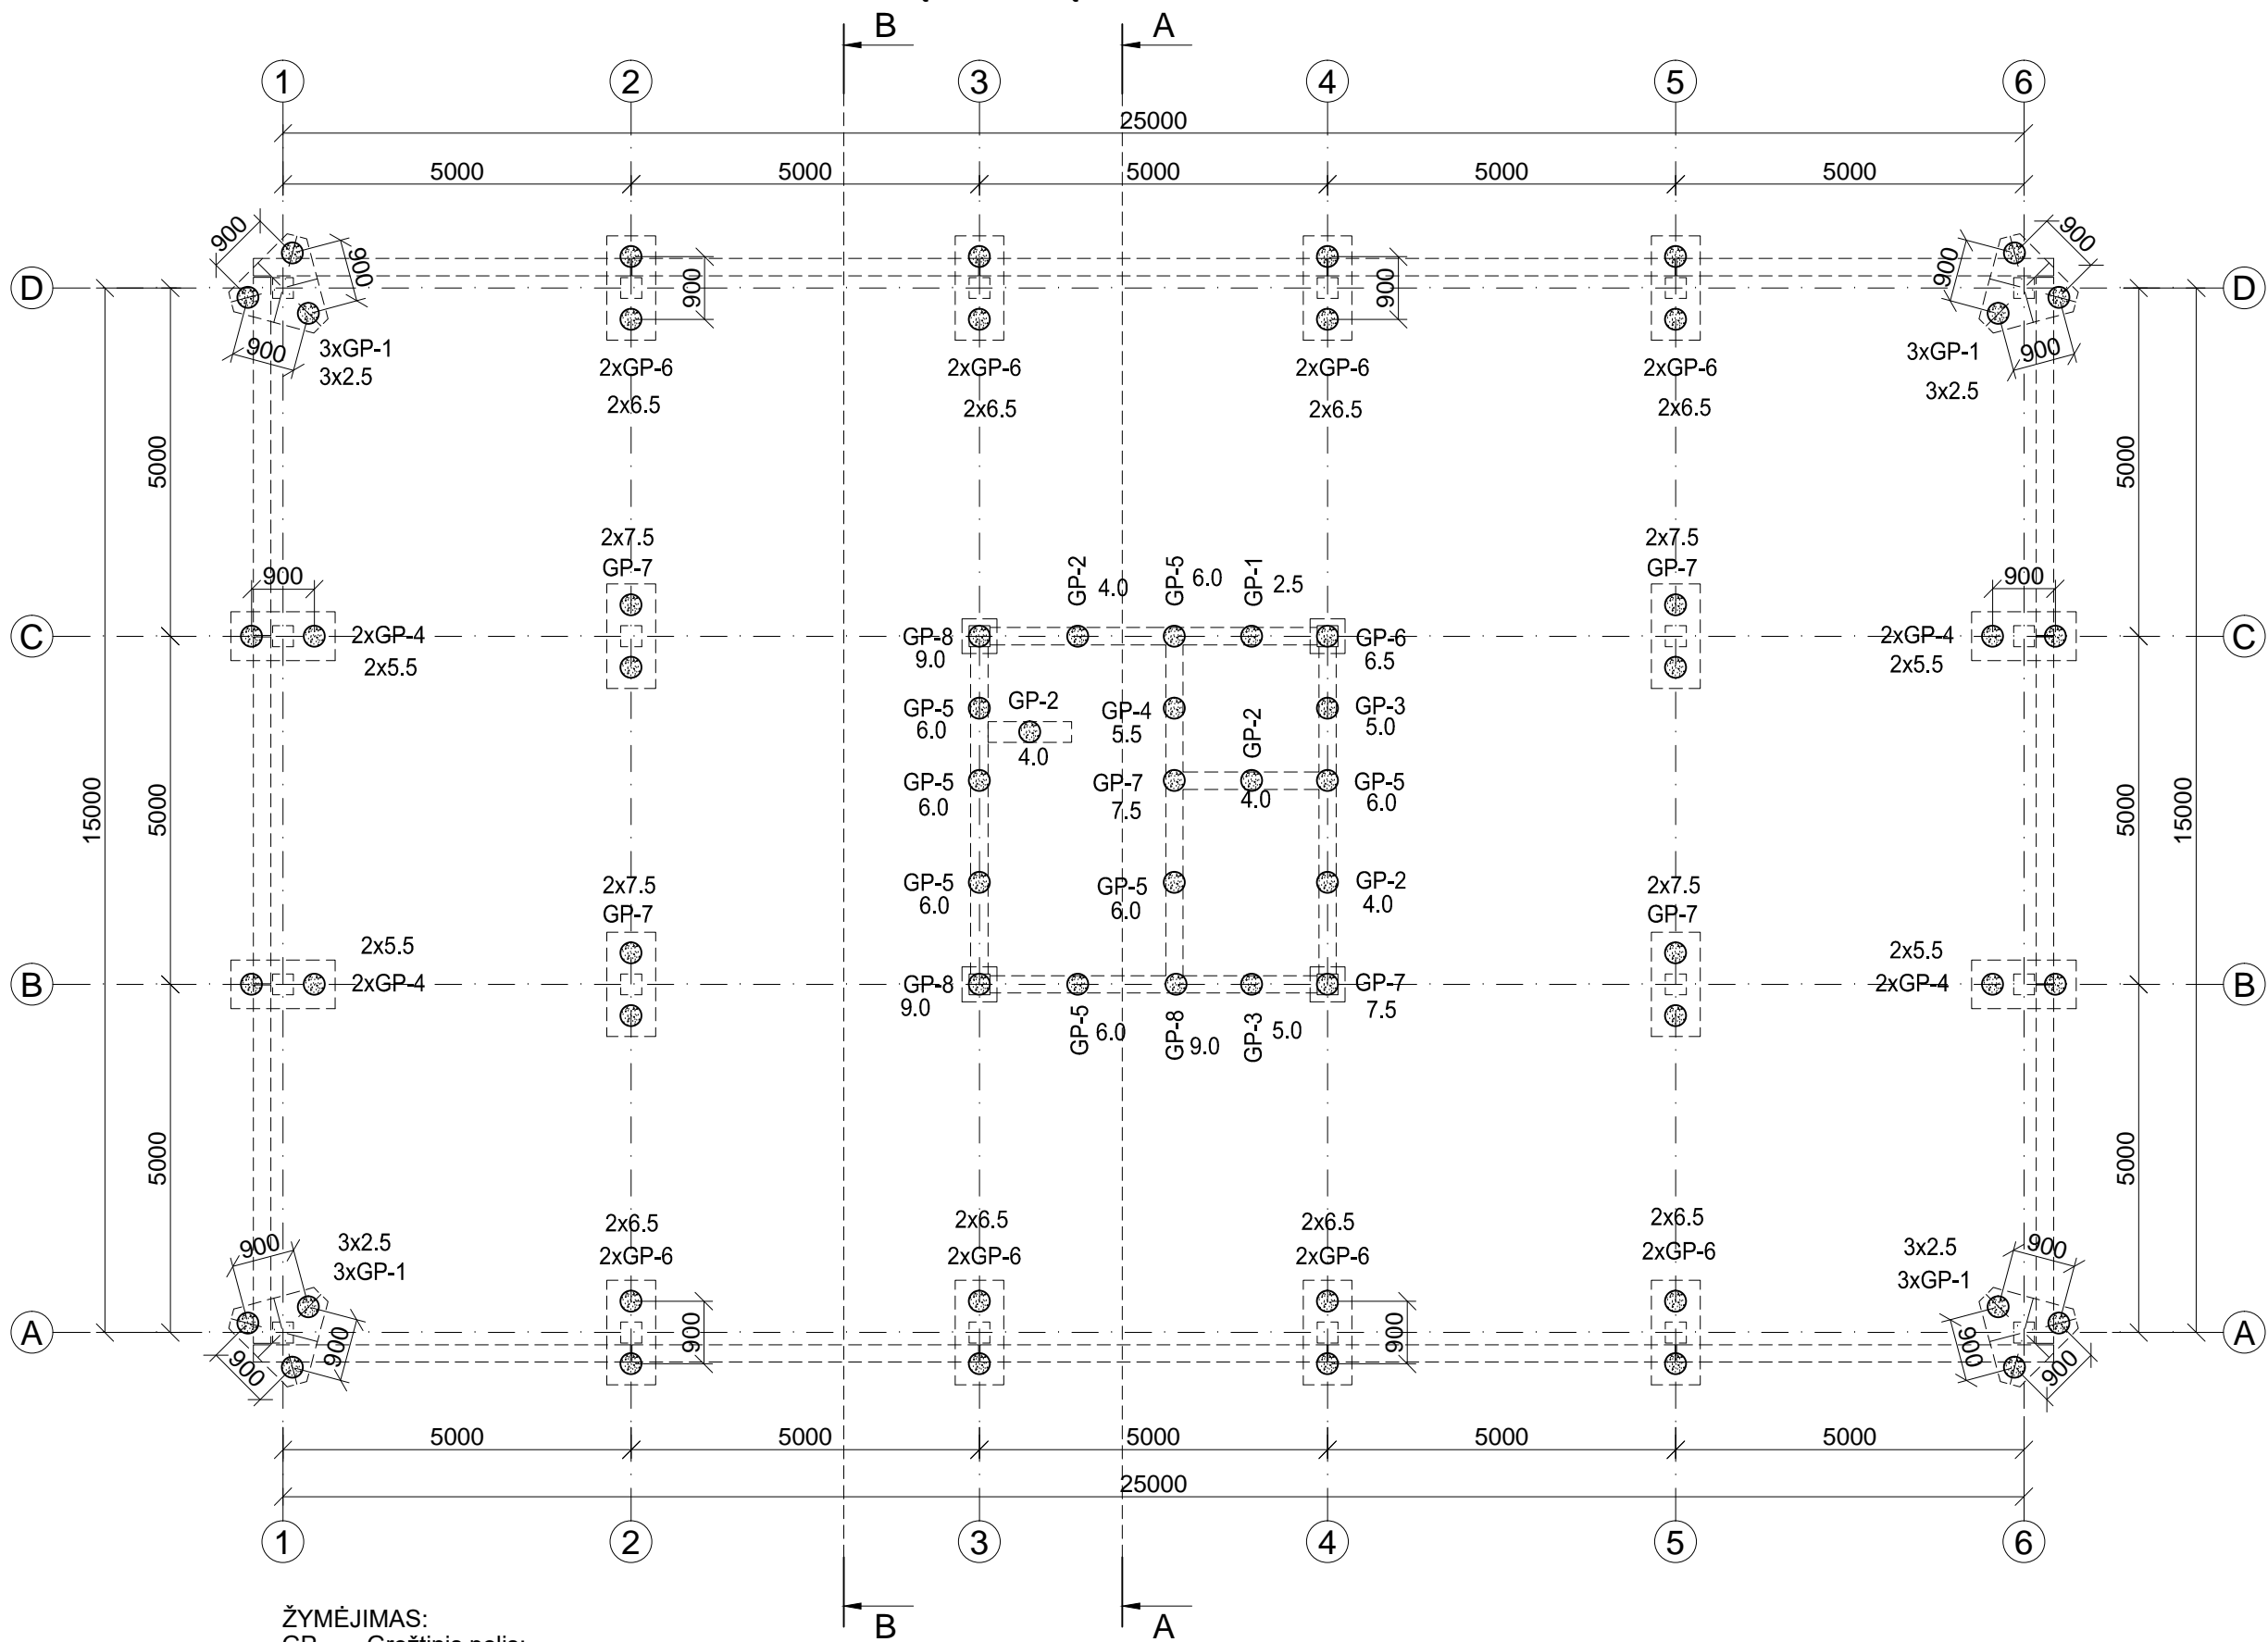

ŽYMĖJIMAS:  
GP-... - Gręžtinis polis;

PASTABOS:

- Gręžtiniai poliniai pamatai suprojektuoti vidutinio stiprumo ir stipraus smėlingo, dulkingo moreninio molio pagrindui ( $q_c=2.1-3.1$  MPa,  $f_s= 79-60$  kPa).
- Gręžtiniai poliai - Ø300 mm skersmens ir 2,5 - 9,0 m ilgių.
- Pamatai gali būti įrengiami, tik vadovaujantis darbo projektu. Už pamatų įrengimo darbų kokybę atsako rangovas.
- Prieš rengiant darbo projektą būtina atlikti vietovės inžinerinius-geologinius tyrinėjimus ir patikslinti polių tipą ir įgilinimą.
- Pamatus gali įrengti tik kvalifikuotas rangovas.
- Gruntas po pamatais turi būti nejudintas, vientisos struktūros.
- Pamatai armuojami S500 stiprumo klasės armatūros strypynais, pagal LST EN ISO 15630-1:2010.
- Pamatams naudojamas C20/25 XC2 stiprumo klasės betonas, pagal LST EN 206-1:2002.

POLINIŲ PAMATŲ ŽINIARAŠTIS

| Žymėjimas | Diametras, mm | Ilgis, mm | Kiekis, vnt. |
|-----------|---------------|-----------|--------------|
| GP-1      | Ø300          | 2500      | 13           |
| GP-2      | Ø300          | 4000      | 4            |
| GP-3      | Ø300          | 5000      | 2            |
| GP-4      | Ø300          | 5500      | 9            |
| GP-5      | Ø300          | 6000      | 7            |
| GP-6      | Ø300          | 6500      | 17           |
| GP-7      | Ø300          | 7500      | 10           |
| GP-8      | Ø300          | 9000      | 3            |

GRĘŽTINIŲ POLINIŲ PAMATŲ SĄNAUDŲ KIEKIŲ ŽINIARAŠTIS

| Eil. Nr.            | Pozicija | Pavadinimas               | Žymuo | Mato vnt. | Kiekis | Sąnaudos Vien. | Iš viso | Svoris vnt., t | Papildomi duomenys |
|---------------------|----------|---------------------------|-------|-----------|--------|----------------|---------|----------------|--------------------|
| 1                   | GP-1     | Polinis pamatas Ø300x2500 |       |           |        |                |         |                |                    |
| 2                   |          | Betonas C20/25 XC2        |       | m³        | 13     | 0.177          | 2.301   |                |                    |
| 3                   |          | Armatūra S500             |       | kg        | 13     | 28.32          | 368.16  |                |                    |
| 4                   | GP-2     | Polinis pamatas Ø300x4000 |       |           |        |                |         |                |                    |
| 5                   |          | Betonas C20/25 XC2        |       | m³        | 4      | 0.283          | 1.132   |                |                    |
| 6                   |          | Armatūra S500             |       | kg        | 4      | 45.28          | 181.12  |                |                    |
| 7                   | GP-3     | Polinis pamatas Ø300x5000 |       |           |        |                |         |                |                    |
| 8                   |          | Betonas C20/25 XC2        |       | m³        | 2      | 0.354          | 0.708   |                |                    |
| 9                   |          | Armatūra S500             |       | kg        | 2      | 56.64          | 113.28  |                |                    |
| 10                  | GP-4     | Polinis pamatas Ø300x5500 |       |           |        |                |         |                |                    |
| 11                  |          | Betonas C20/25 XC2        |       | m³        | 9      | 0.389          | 3.501   |                |                    |
| 12                  |          | Armatūra S500             |       | kg        | 9      | 62.24          | 560.16  |                |                    |
| 13                  | GP-5     | Polinis pamatas Ø300x6000 |       |           |        |                |         |                |                    |
| 14                  |          | Betonas C20/25 XC2        |       | m³        | 7      | 0.424          | 2.968   |                |                    |
| 15                  |          | Armatūra S500             |       | Kg        | 7      | 67.84          | 474.88  |                |                    |
| 16                  | GP-6     | Polinis pamatas Ø300x6500 |       |           |        |                |         |                |                    |
| 17                  |          | Betonas C20/25 XC2        |       | m³        | 17     | 0.460          | 7.820   |                |                    |
| 18                  |          | Armatūra S500             |       | kg        | 17     | 73.60          | 1251.2  |                |                    |
| 19                  | GP-7     | Polinis pamatas Ø300x7500 |       |           |        |                |         |                |                    |
| 20                  |          | Betonas C20/25 XC2        |       | m³        | 10     | 0.530          | 5.300   |                |                    |
| 21                  |          | Armatūra S500             |       | kg        | 10     | 84.80          | 848.00  |                |                    |
| 22                  | GP-8     | Polinis pamatas Ø300x9000 |       |           |        |                |         |                |                    |
| 23                  |          | Betonas C20/25 XC2        |       | m³        | 3      | 0.637          | 1.911   |                |                    |
| 24                  |          | Armatūra S500             |       | kg        | 3      | 101.92         | 305.76  |                |                    |
| Viso betono, m³:    |          |                           |       |           |        |                | 25.641  |                |                    |
| Viso armatūros, kg: |          |                           |       |           |        |                | 4102.6  |                |                    |

|                            |                                                                                                                   |                                                                                                                                       |         |                     |                                                                                      |                       |       |       |
|----------------------------|-------------------------------------------------------------------------------------------------------------------|---------------------------------------------------------------------------------------------------------------------------------------|---------|---------------------|--------------------------------------------------------------------------------------|-----------------------|-------|-------|
| KVAL.<br>PATV.<br>DOK. NR. |                                                                                                                   | UAB "Konstrukcijų pasaulis"                                                                                                           |         |                     | STATINIO PROJEKTO PAVADINIMAS                                                        |                       |       |       |
|                            |                                                                                                                   | Jonavos g. 260, Kaunas<br>Įm. k.: 304690224<br>Tel. +370 (613) 98089<br>El.p.: k.pazereckas@gmail.com<br>www.konstrukciju-pasaulis.lt |         |                     | Negyvenamasis 2 aukštų surenkamo gelžbetonio konstrukcijų mokslo paskirties pastatas |                       |       |       |
|                            |                                                                                                                   | 37603                                                                                                                                 | PDV     | Kęstutis Pažereckas | 2018 08                                                                              | DOKUMENTO PAVADINIMAS |       | LAIDA |
|                            |                                                                                                                   | 37603                                                                                                                                 | Konstr. | Kęstutis Pažereckas | 2018 08                                                                              | Polių pamatų planas   |       | O     |
|                            |                                                                                                                   |                                                                                                                                       |         |                     |                                                                                      |                       |       |       |
| LT                         | UŽSAKOVAS                                                                                                         |                                                                                                                                       |         |                     | BRĖŽINIO ŽYMUO                                                                       |                       | LAPAS | LAPŲ  |
|                            | Miškų institutas, Lietuvos agrarinių ir miškų mokslų centro filialas, Liepų g. 1, Girionių k., LT-53101, Kauno r. |                                                                                                                                       |         |                     | KPRS18/02-TP-SK-1.3                                                                  |                       | 1     | 1     |
|                            |                                                                                                                   |                                                                                                                                       |         |                     |                                                                                      |                       |       |       |



POLIŲ GALVENŲ IR ROSTVERKŲ PLANAS MASTELIS 1:100

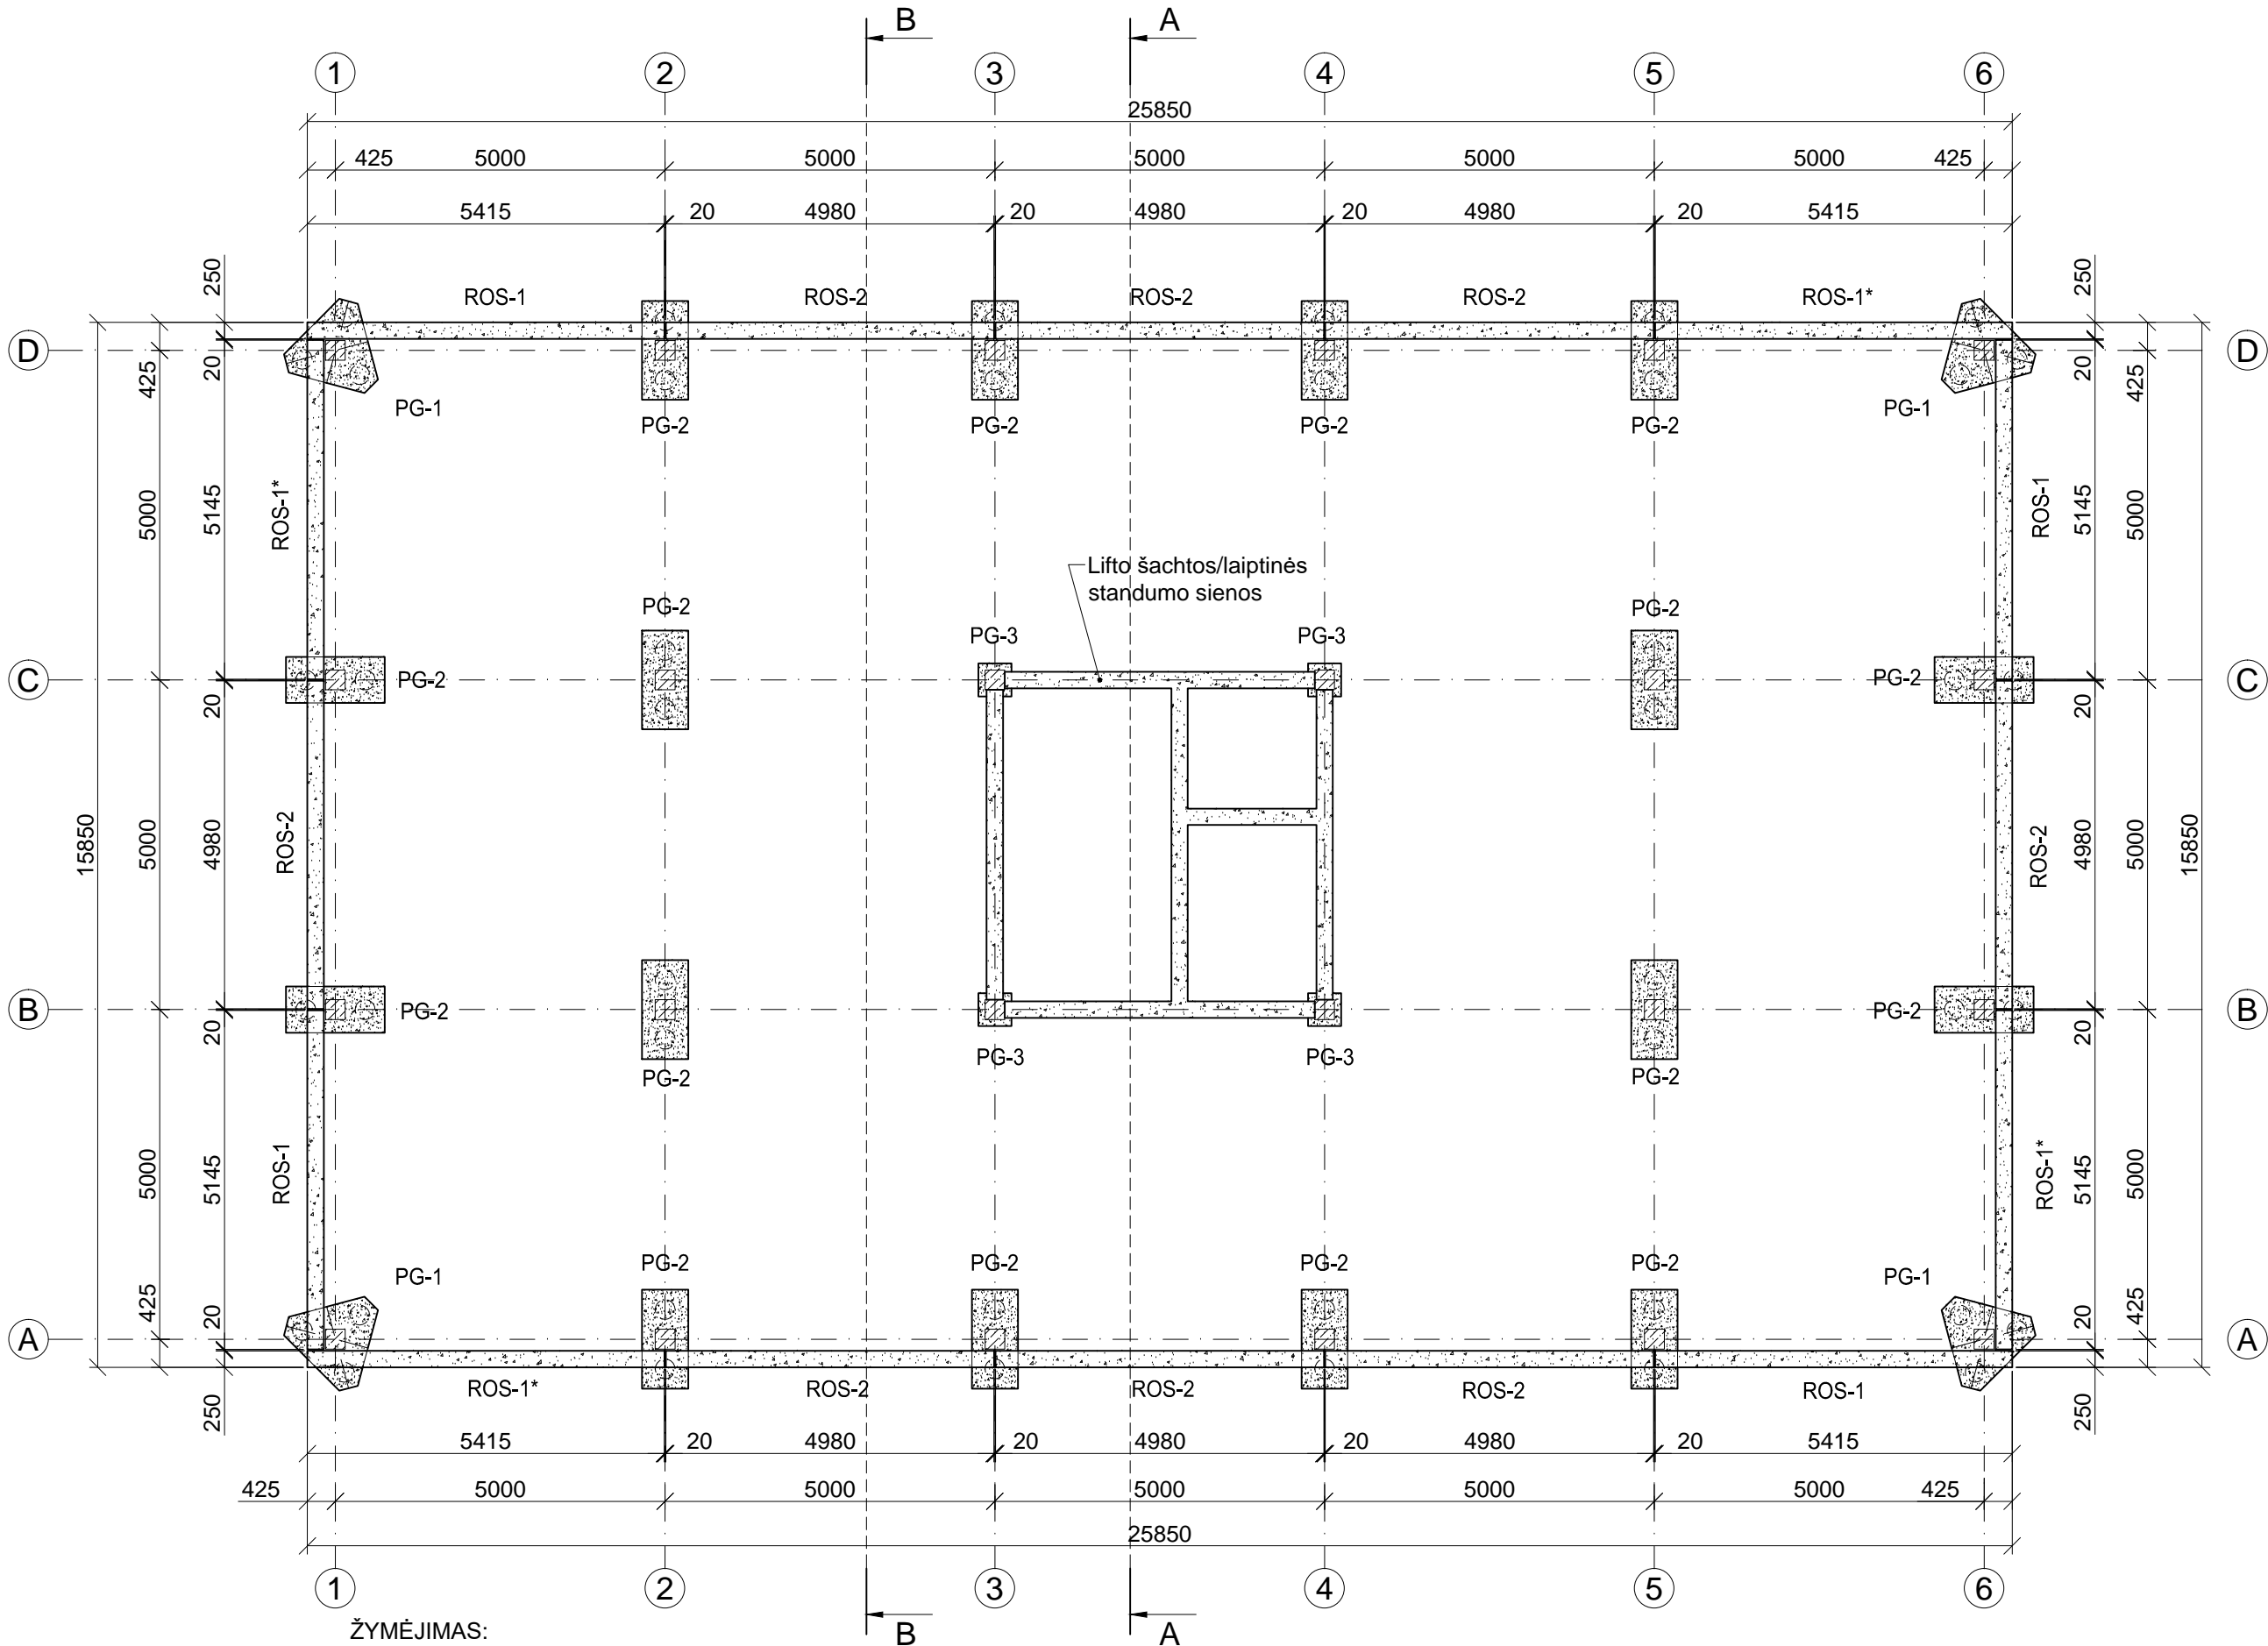

ROSTVERKŲ TVIRTINIMO PRIE KOLONOS MAZGAS MASTELIS 1:10

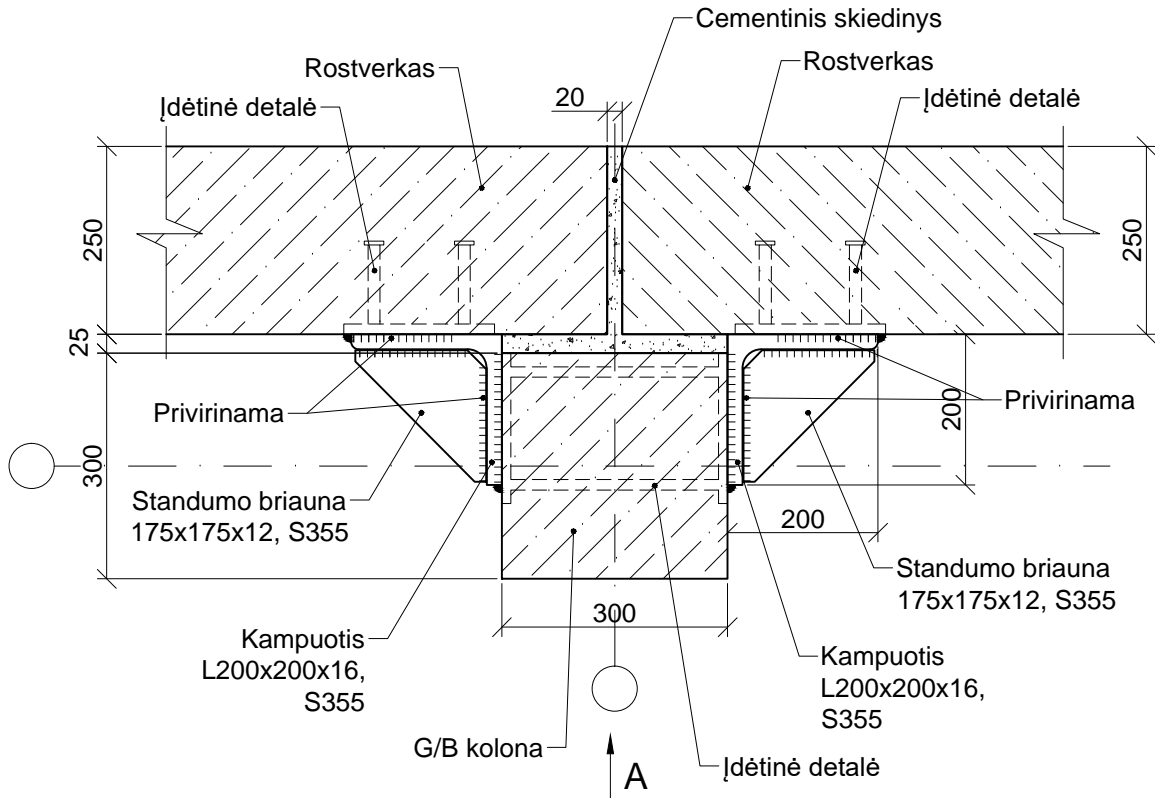

VAIZDAS A MASTELIS 1:10

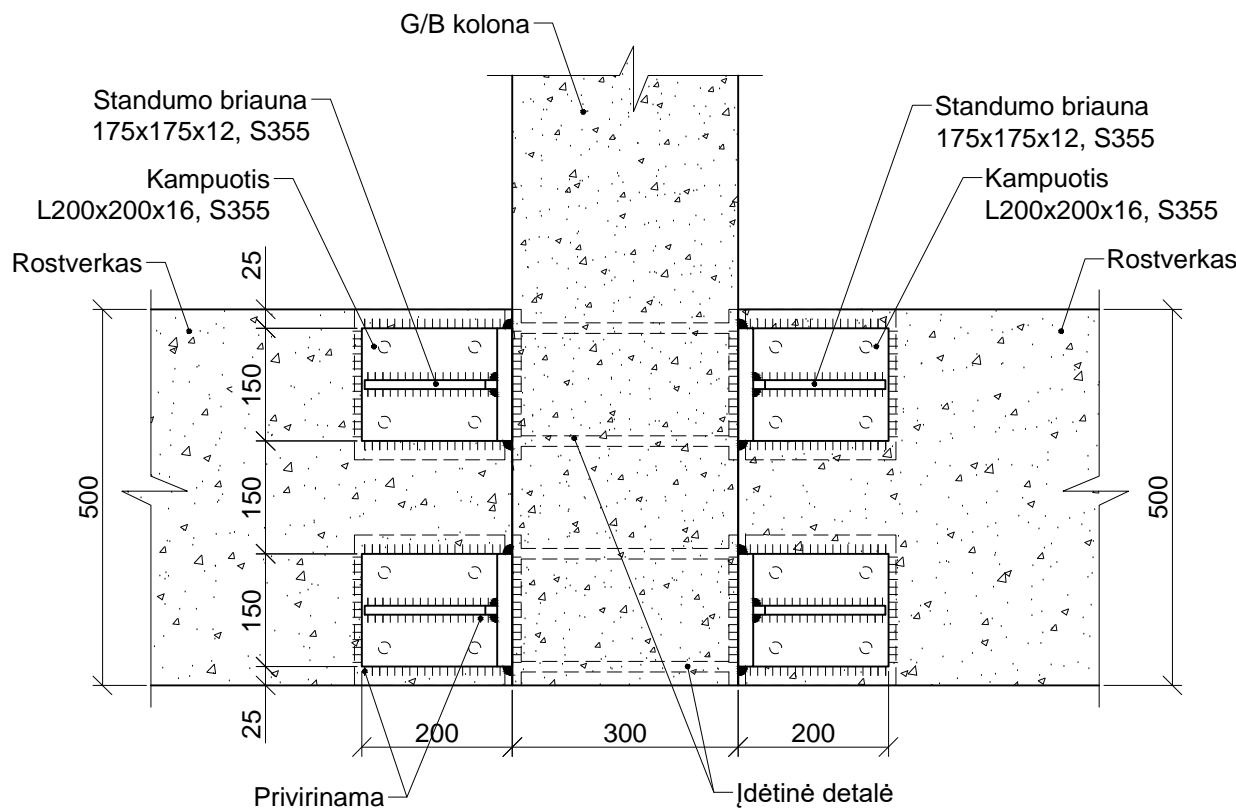

GALVENŲ PARUOŠIAMŲJŲ SLUKSNIŲ SĄNAUDŲ KIEKIŲ ŽINIARAŠTIS

| Eil. Nr.         | Pozicija | Pavadinimas                           | Žymuo | Mato vnt. | Kiekis | Sąnaudos Vien. | Iš viso | Svoris vnt., t | Papildomi duomenys |
|------------------|----------|---------------------------------------|-------|-----------|--------|----------------|---------|----------------|--------------------|
| 1                | PG-1     | Paruošiamasis sluoksnis 1700x1500x100 |       |           |        |                |         |                |                    |
| 2                |          | Betonas C8/10                         |       | m³        | 4      | 0.255          | 1.020   |                |                    |
| 3                | PG-2     | Paruošiamasis sluoksnis 1700x900x100  |       |           |        |                |         |                |                    |
| 4                |          | Betonas C8/10                         |       | m³        | 16     | 0.153          | 2.448   |                |                    |
| 5                | PG-3     | Paruošiamasis sluoksnis 700x700x100   |       |           |        |                |         |                |                    |
| 6                |          | Betonas C8/10                         |       | m³        | 4      | 0.049          | 0.196   |                |                    |
| Viso betono, m³: |          |                                       |       |           |        |                | 3.664   |                |                    |

MONOLITINIŲ POLIŲ GALVENŲ SĄNAUDŲ KIEKIŲ ŽINIARAŠTIS

| Eil. Nr.                          | Pozicija | Pavadinimas                   | Žymuo | Mato vnt. | Kiekis | Sąnaudos Vien. | Iš viso | Svoris vnt., t | Papildomi duomenys |
|-----------------------------------|----------|-------------------------------|-------|-----------|--------|----------------|---------|----------------|--------------------|
| 1                                 | PG-1     | Poliaus galvena 1477x1275x600 |       |           |        |                |         |                |                    |
| 2                                 |          | Betonas C25/30 XC2            |       | m³        | 4      | 0.746          | 2.984   |                |                    |
| 3                                 |          | Armatūra S500                 |       | kg        | 4      | 74.60          | 298.40  |                |                    |
| 4                                 |          | Idėtinių detalių plienas S355 |       | kg        | 4      | 15.00          | 60.00   |                |                    |
| 5                                 | PG-2     | Poliaus galvena 1500x700x600  |       |           |        |                |         |                |                    |
| 6                                 |          | Betonas C25/30 XC2            |       | m³        | 16     | 0.630          | 10.080  |                |                    |
| 7                                 |          | Armatūra S500                 |       | kg        | 16     | 63.00          | 1008.0  |                |                    |
| 8                                 |          | Idėtinių detalių plienas S355 |       | kg        | 16     | 15.00          | 240.00  |                |                    |
| 9                                 | PG-3     | Poliaus galvena 500x500x600   |       |           |        |                |         |                |                    |
| 10                                |          | Betonas C25/30 XC2            |       | m³        | 4      | 0.150          | 0.600   |                |                    |
| 11                                |          | Armatūra S500                 |       | kg        | 4      | 15.00          | 60.00   |                |                    |
| 12                                |          | Idėtinių detalių plienas S355 |       | kg        | 4      | 15.00          | 60.00   |                |                    |
| Viso betono, m³:                  |          |                               |       |           |        |                | 13.664  |                |                    |
| Viso armatūros, kg:               |          |                               |       |           |        |                | 1366.4  |                |                    |
| Viso idėtinių detalių plieno, kg: |          |                               |       |           |        |                | 360.00  |                |                    |

GELŽBETONINIŲ ROSTVERKŲ SĄNAUDŲ KIEKIŲ ŽINIARAŠTIS

| Eil. Nr.            | Pozicija | Pavadinimas             | Žymuo | Mato vnt. | Kiekis | Sąnaudos Vien. | Iš viso | Svoris vnt., t | Papildomi duomenys |
|---------------------|----------|-------------------------|-------|-----------|--------|----------------|---------|----------------|--------------------|
| 1                   | ROS-1    | Rostverkas 5390x500x250 |       |           |        |                |         |                |                    |
| 2                   |          | Betonas C25/30 XC2      |       | m³        | 4      | 0.650          | 2.600   |                |                    |
| 3                   |          | Armatūra S500           |       | kg        | 4      | 78.00          | 312.00  |                |                    |
| 4                   | ROS-1*   | Rostverkas 5390x500x250 |       |           |        |                |         |                |                    |
| 5                   |          | Betonas C25/30 XC2      |       | m³        | 4      | 0.650          | 2.600   |                |                    |
| 6                   |          | Armatūra S500           |       | kg        | 4      | 78.00          | 312.00  |                |                    |
| 7                   | ROS-2    | Rostverkas 4980x500x250 |       |           |        |                |         |                |                    |
| 8                   |          | Betonas C25/30 XC2      |       | m³        | 8      | 0.611          | 4.888   |                |                    |
| 9                   |          | Armatūra S500           |       | kg        | 8      | 73.32          | 586.56  |                |                    |
| Viso betono, m³:    |          |                         |       |           |        |                | 10.088  |                |                    |
| Viso armatūros, kg: |          |                         |       |           |        |                | 1210.6  |                |                    |

GELŽBETONINIŲ ROSTVERKŲ TVIRTINIMO SĄNAUDŲ KIEKIŲ ŽINIARAŠTIS

| Eil. Nr.         | Pozicija | Pavadinimas                  | Žymuo | Mato vnt. | Kiekis | Sąnaudos Vien. | Iš viso | Svoris vnt., t | Papildomi duomenys |
|------------------|----------|------------------------------|-------|-----------|--------|----------------|---------|----------------|--------------------|
| 1                | ROS-1    | Rostverkas 5390x500x250      |       |           |        |                |         |                |                    |
| 2                |          | Idėtinės plieno detalės S355 |       | kg        | 4      | 20             | 80.0    |                |                    |
| 3                |          | Jungimo plienas S355         |       | kg        | 4      | 40             | 160.0   |                |                    |
| 4                | ROS-1*   | Rostverkas 5390x500x250      |       |           |        |                |         |                |                    |
| 5                |          | Idėtinės plieno detalės S355 |       | kg        | 4      | 20             | 80.0    |                |                    |
| 6                |          | Jungimo plienas S355         |       | kg        | 4      | 40             | 160.0   |                |                    |
| 7                | ROS-2    | Rostverkas 4980x500x250      |       |           |        |                |         |                |                    |
| 8                |          | Idėtinės plieno detalės S355 |       | kg        | 8      | 20             | 160.0   |                |                    |
| 9                |          | Jungimo plienas S355         |       | kg        | 8      | 40             | 320.0   |                |                    |
| Viso plieno, kg: |          |                              |       |           |        |                | 960.0   |                |                    |

PASTABOS:

- Pamatus gali įrengti tik kvalifikuotas rangovas.
- Pamatai gali būti įrengiami, tik vadovaujantis darbo projektu. Už pamatų įrengimo darbų kokybę atsako rangovas.
- Gruntas po pamatais turi būti nejudintas, vientisos struktūros.
- Pamatų galvenos įrengiamos ant C8/10 paruošiamojo betono sluoksnio, prieš tai sutankinus esamą žvyraugą smėliu, k=0.96.
- Pamatų galvenos užpilamos žvyro/smėlio mišiniu, pastarąjį sutankinant, k=0.96.
- Ant galvenos viršaus tepama hidroizoliacija, jei ant jos įrengiama gelžbetoninė konstrukcija.
- Monolitinės galvenos ir rostverkai armuojami S500 stiprumo klasės armatūros tinklais ir strypynais, pagal LST EN ISO 15630-1:2010.
- Monolitinėms galvenoms ir rostverkams naudojamas C25/30, XC2, stiprumo klasės betonas, pagal LST EN 206-1:2002.

|                            |                                                                                                                                |                                                                                                                                                                      |         |                                                                                                                       |  |  |       |
|----------------------------|--------------------------------------------------------------------------------------------------------------------------------|----------------------------------------------------------------------------------------------------------------------------------------------------------------------|---------|-----------------------------------------------------------------------------------------------------------------------|--|--|-------|
| KVAL.<br>PATV.<br>DOK. NR. |                                           | UAB "Konstrukcijų pasaulis"<br>Jonavos g. 260, Kaunas<br>Įm. k.: 304690224<br>Tel. +370 (613) 98089<br>El.p.: k.pazereckas@gmail.com<br>www.konstrukciju-pasaulis.lt |         | STATINIO PROJEKTO PAVADINIMAS<br>Negyvenamasis 2 aukštų surenkamo gelžbetonio konstrukcijų mokslo paskirties pastatas |  |  |       |
| 37603                      | PDV                                                                                                                            | Kęstutis Pažereckas                                                                                                                                                  | 2018 08 | DOKUMENTO PAVADINIMAS<br>Polių galvenų ir rostverkų planas                                                            |  |  | LAIDA |
| 37603                      | Konstr.                                                                                                                        | Kęstutis Pažereckas                                                                                                                                                  | 2018 08 |                                                                                                                       |  |  | O     |
|                            |                                                                                                                                |                                                                                                                                                                      |         |                                                                                                                       |  |  |       |
| LT                         | UŽSAKOVAS<br>Miškų institutas, Lietuvos agrarinių ir miškų mokslų centro filialas, Liepų g. 1, Girionių k., LT-53101, Kauno r. |                                                                                                                                                                      |         | BRĖŽINIO ŽYMUO<br>KPRS18/02-TP-SK-1.4                                                                                 |  |  | LAPAS |
|                            |                                                                                                                                |                                                                                                                                                                      |         |                                                                                                                       |  |  | LAPŲ  |
|                            |                                                                                                                                |                                                                                                                                                                      |         |                                                                                                                       |  |  | 1     |
|                            |                                                                                                                                |                                                                                                                                                                      |         |                                                                                                                       |  |  | 1     |

POLIAUS GALVENA PG-1 MASTELIS 1:25

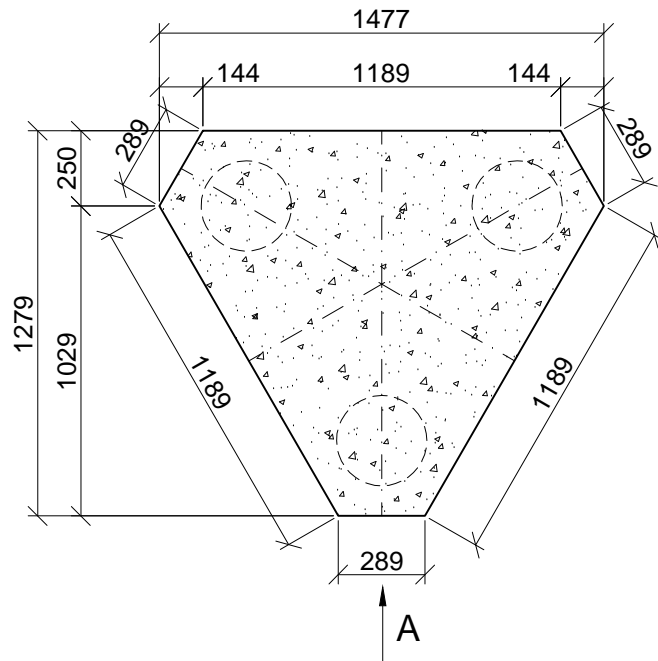

VAIZDAS A MASTELIS 1:25

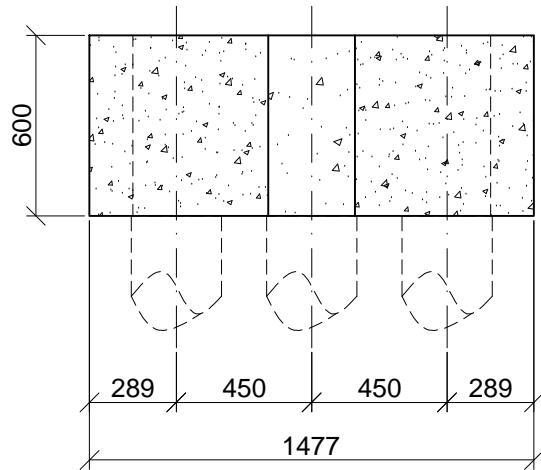

POLIAUS GALVENA PG-2 MASTELIS 1:25

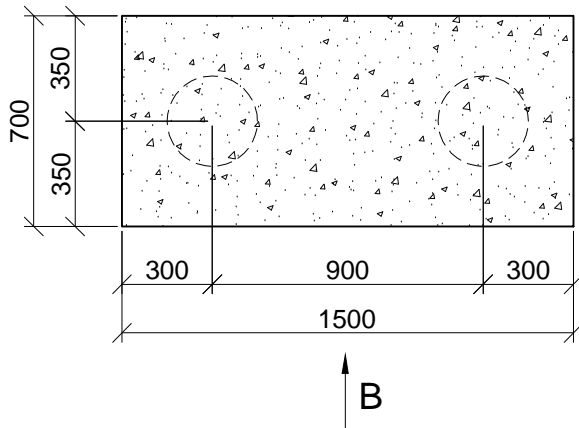

VAIZDAS B MASTELIS 1:25

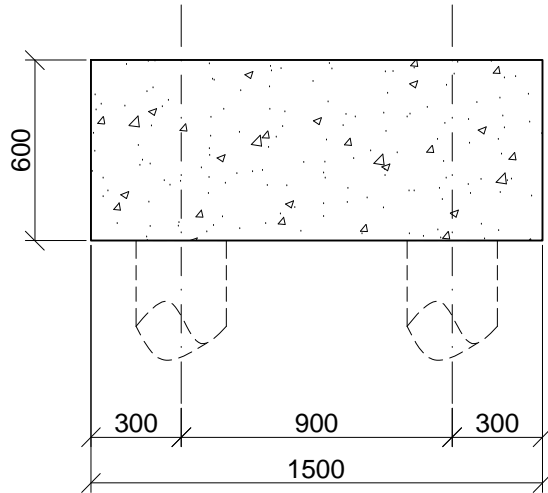

POLIAUS GALVENA PG-3 MASTELIS 1:25

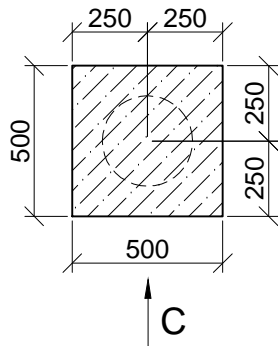

VAIZDAS C MASTELIS 1:25

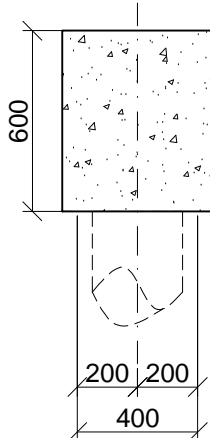

|                            |                                                                                                                      |                               |         |                                                           |  |       |      |
|----------------------------|----------------------------------------------------------------------------------------------------------------------|-------------------------------|---------|-----------------------------------------------------------|--|-------|------|
| KVAL.<br>PATV.<br>DOK. NR. |                                                                                                                      | UAB "Konstrukcijų pasaulis"   |         | STATINIO PROJEKTO PAVADINIMAS                             |  |       |      |
|                            |                                                                                                                      | Jonavos g. 260, Kaunas        |         | Negyvenamasis 2 aukštų surenkamo gelžbetonio konstrukcijų |  |       |      |
|                            |                                                                                                                      | Įm. k.: 304690224             |         | mokslo paskirties pastatas                                |  |       |      |
|                            |                                                                                                                      | Tel. +370 (613) 98089         |         |                                                           |  |       |      |
|                            |                                                                                                                      | El.p.: k.pazereckas@gmail.com |         |                                                           |  |       |      |
|                            |                                                                                                                      | www.konstrukciju-pasaulis.lt  |         |                                                           |  |       |      |
| 37603                      | PDV                                                                                                                  | Kęstutis Pažereckas           | 2018 08 | DOKUMENTO PAVADINIMAS<br>Polii galvenos                   |  | LAIDA |      |
| 37603                      | Konstr.                                                                                                              | Kęstutis Pažereckas           | 2018 08 |                                                           |  | O     |      |
|                            |                                                                                                                      |                               |         |                                                           |  |       |      |
| LT                         | UŽSAKOVAS                                                                                                            |                               |         | BRĖŽINIO ŽYMUO<br><br>KPRS18/02-TP-SK-1.5                 |  | LAPAS | LAPŲ |
|                            | Miškų institutas, Lietuvos agrarinių ir miškų mokslų<br>centro filialas, Liepų g. 1, Girionių k., LT-53101, Kauno r. |                               |         |                                                           |  | 1     | 1    |

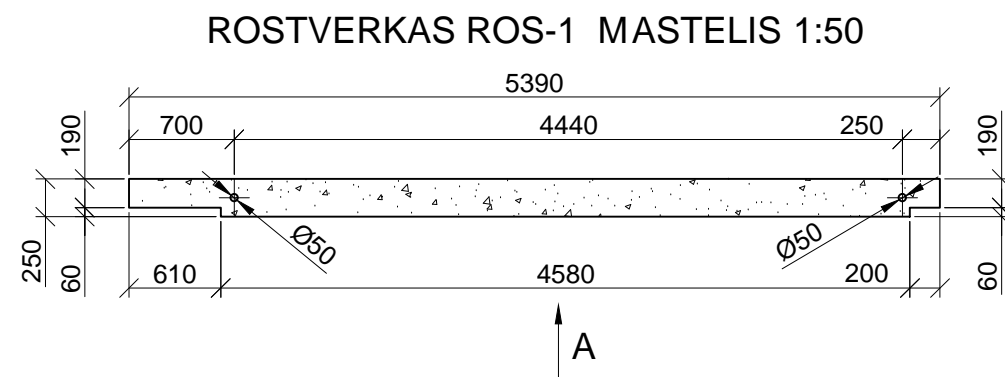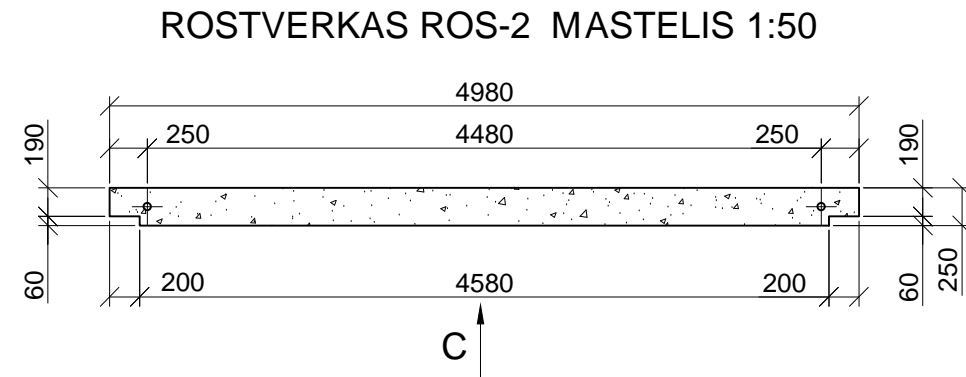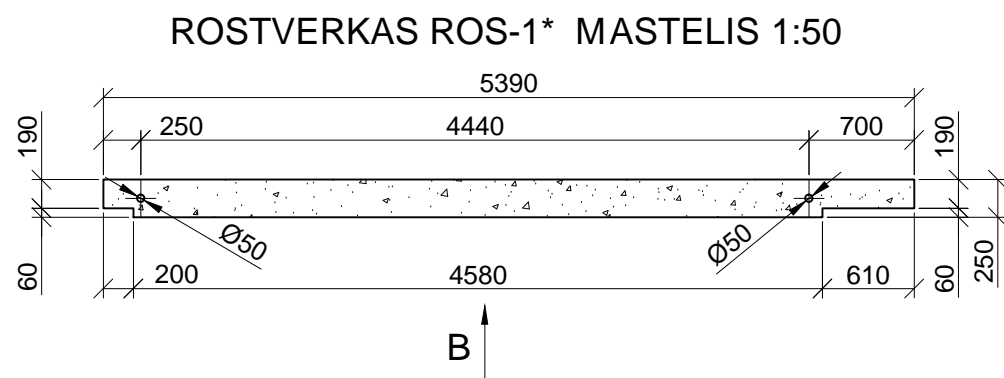

|                            |                                                                                                                                    |                                                                                                                                       |         |                                                                                      |  |  |       |
|----------------------------|------------------------------------------------------------------------------------------------------------------------------------|---------------------------------------------------------------------------------------------------------------------------------------|---------|--------------------------------------------------------------------------------------|--|--|-------|
| KVAL.<br>PATV.<br>DOK. NR. |                                               | UAB "Konstrukcijų pasaulis"                                                                                                           |         | STATINIO PROJEKTO PAVADINIMAS                                                        |  |  |       |
|                            |                                                                                                                                    | Jonavos g. 260, Kaunas<br>Įm. k.: 304690224<br>Tel. +370 (613) 98089<br>El.p.: k.pazereckas@gmail.com<br>www.konstrukciju-pasaulis.lt |         | Negyvenamasis 2 aukštų surenkamo gelžbetonio konstrukcijų mokslo paskirties pastatas |  |  |       |
|                            |                                                                                                                                    |                                                                                                                                       |         |                                                                                      |  |  |       |
| 37603                      | PDV                                                                                                                                | Kęstutis Pažereckas                                                                                                                   | 2018 08 | DOKUMENTO PAVADINIMAS<br>Rostverkai                                                  |  |  | LAIDA |
| 37603                      | Konstr.                                                                                                                            | Kęstutis Pažereckas                                                                                                                   | 2018 08 |                                                                                      |  |  | O     |
|                            |                                                                                                                                    |                                                                                                                                       |         | BRĖŽINIO ŽYMUO<br><br>KPRS18/02-TP-SK-1.6                                            |  |  | LAPAS |
| LT                         | UŽSAKOVAS<br><br>Miškų institutas, Lietuvos agrarinių ir miškų mokslų centro filialas, Liepų g. 1, Girionių k., LT-53101, Kauno r. |                                                                                                                                       |         |                                                                                      |  |  | 1     |
|                            |                                                                                                                                    |                                                                                                                                       |         |                                                                                      |  |  | 1     |



PIRMO AUKŠTO PLANAS MASTELIS 1:100

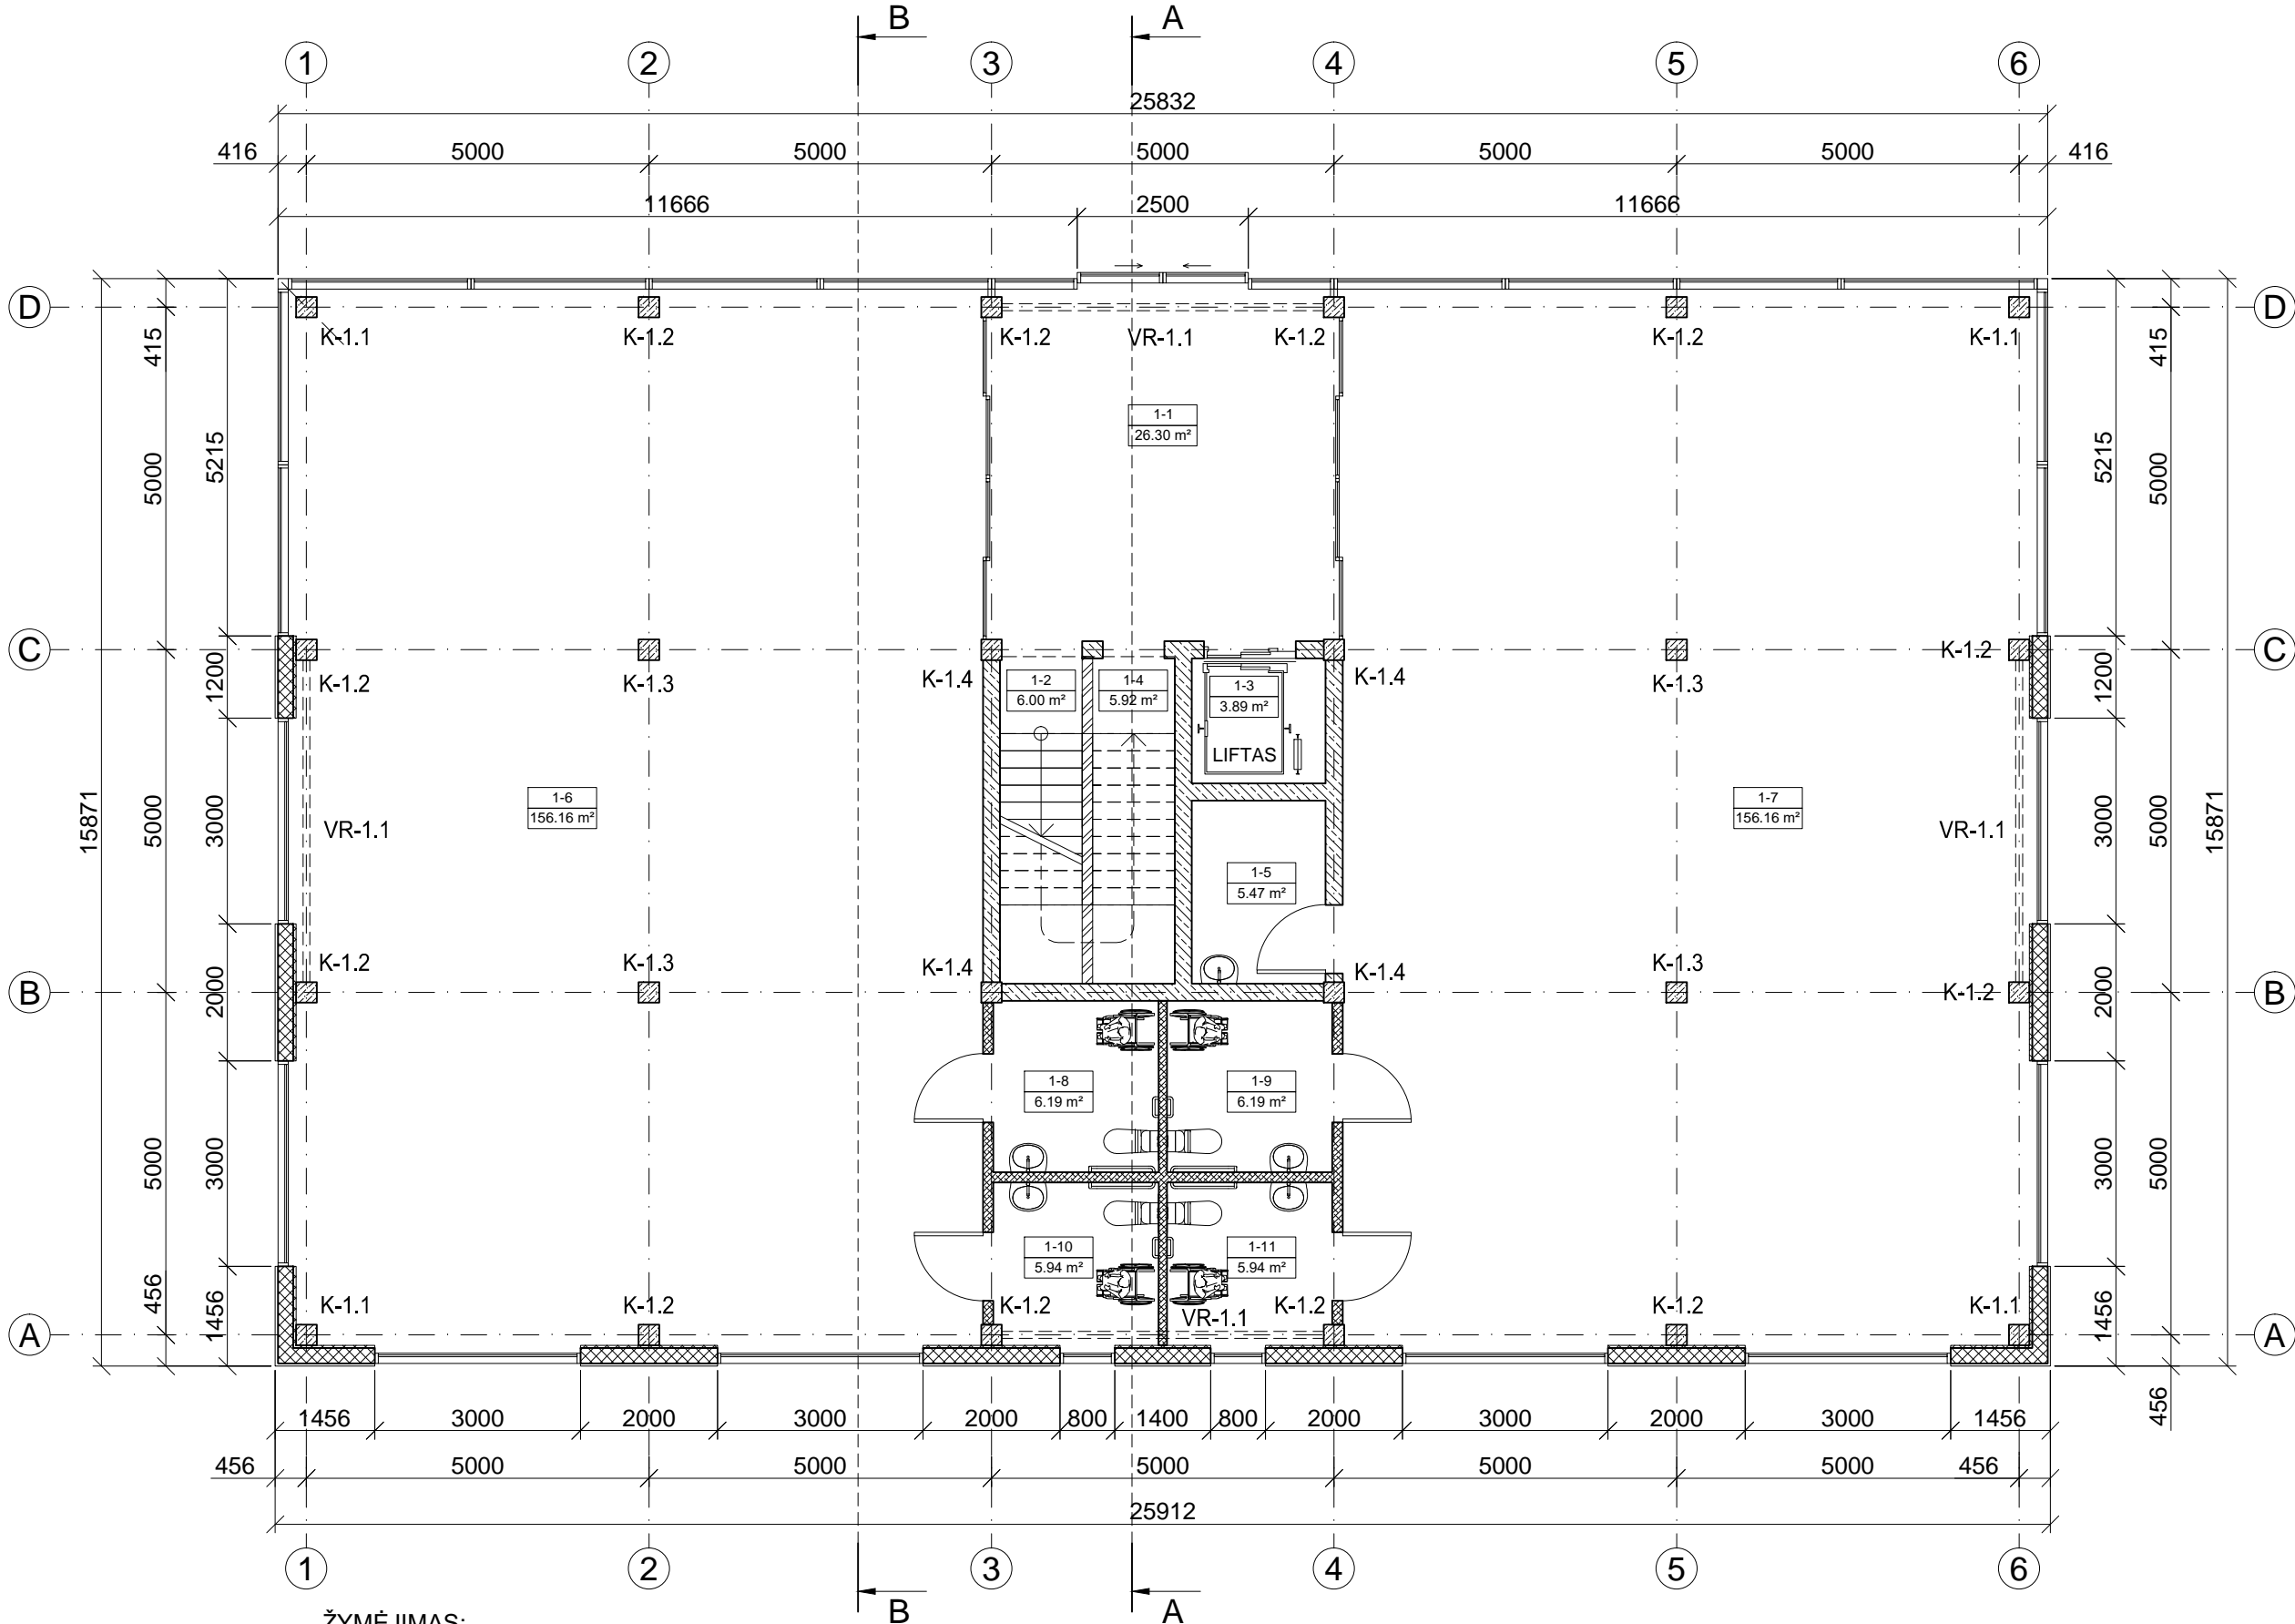

ŽYMĖJIMAS:  
K-... - Gelžbetoninė surenkama kolona;  
VR-... - Plieniniai vertikalieji ryšiai;

- PASTABOS:
- Surenkamų g/b kolonų montavimui ant pamato bei tarpusavio sujungimams naudojami inkariniai varžtai ir kolonų padai.
  - Surenkamų g/b kolonų įdėtinės detalės projektuojamos darbo projekto stadijoje.
  - Gelžbetoninėms kolonoms naudojamas C30/37, F150, XC1 stiprumo klasės betonas, pagal LST EN 206-1:2002.
  - Gelžbetoninės kolonos armuojamos S500 stiprumo klasės armatūros strypynais, pagal LST EN ISO 15630-1:2010. Gelžbetoninių kolonų išilginė armatūra sujungiama užleidimu, prakeičiant ne mažiau 40·d (d - didesnio iš jungiamų strypų skersmuo).
  - Gelžbetonio kolonų atsparumas ugniai R45 min.
  - Monolitinėms laiptinių ir lifto šachtų standumo sienoms naudojamas C30/37 X0 klasės betonas, pagal LST EN 206-1:2002.
  - Monolitiniai elementai armuojami S500 stiprumo klasės armatūros tinklais ir/ar strypynais, pagal LST EN ISO 15630-1:2010.
  - Metalinėms konstrukcijoms ir elementams naudojamas S355 stiprumo klasės plienas.
  - Suvirinimo jungčių briaunų paruošimas turi būti atliekamas pagal EN ISO 9692-1.
  - Metaliniai elementai tarpusavyje suvirinami, siūlės aukštis 1,2·kf - plonesniojo iš jungiamųjų elementų storis (jei nenurodyta kitaip), pagal LST EN ISO 9692-1:2004.
  - Konstrukcijų suvirinimui naudojamos suvirinimo medžiagos užtikrinančios suvirinimo siūlės skaičiuojamuosius stiprius ne mažesnius nei suvirinamo metalo.
  - Metaliniai paviršiai gruntuojami ir dažomi, pagal LST EN ISO 12944-2:2000.
  - Skylės varžtams daromos 2 mm didesnės nei varžto diametras (jei brėžinyje nenurodyta kitaip).
  - Darbai vykdomi pagal darbo projektą.

| Patalpų eksplikacija |                  |           |
|----------------------|------------------|-----------|
| Numeris              | Patalpa          | Plotas    |
| 1-1                  | Fojė             | 26.30 m²  |
| 1-2                  | Laiptinė         | 6.00 m²   |
| 1-3                  | Lifto šachta     | 3.89 m²   |
| 1-4                  | Tech. patalpa    | 5.92 m²   |
| 1-5                  | Tech. patalpa    | 5.47 m²   |
| 1-6                  | Įstaigų patalpos | 156.16 m² |
| 1-7                  | Įstaigų patalpos | 156.16 m² |
| 1-8                  | San. mazgas      | 6.19 m²   |
| 1-9                  | San. mazgas      | 6.19 m²   |
| 1-10                 | San. mazgas      | 5.94 m²   |
| 1-11                 | San. mazgas      | 5.94 m²   |
| Viso aukšte:         |                  | 384.16 m² |
| Viso pastate:        |                  | 767.58 m² |

GELŽBETONINIŲ PIRMO AUKŠTO KOLONŲ SĄNAUDŲ KIEKIŲ ŽINIARAŠTIS

| Eil. Nr.                         | Pozicija | Pavadinimas                  | Žymuo | Mato vnt. | Kiekis | Sąnaudos |         | Svoris vnt., t | Papildomi duomenys |
|----------------------------------|----------|------------------------------|-------|-----------|--------|----------|---------|----------------|--------------------|
|                                  |          |                              |       |           |        | Vien.    | Iš viso |                |                    |
| 1                                | K-1.1    | Kolona 300x300x4090          |       |           |        |          |         |                |                    |
| 2                                |          | Betonas C30/37 X0            |       | m³        | 4      | 0.368    | 1.472   |                |                    |
| 3                                |          | Armatūra S500                |       | kg        | 4      | 36.80    | 147.20  |                |                    |
| 4                                |          | Įdėtinų detalių plienas S355 |       | kg        | 4      | 60.00    | 240.00  |                |                    |
| 5                                | K-1.2    | Kolona 300x300x4090          |       |           |        |          |         |                |                    |
| 6                                |          | Betonas C30/37 X0            |       | m³        | 12     | 0.368    | 4.416   |                |                    |
| 7                                |          | Armatūra S500                |       | kg        | 12     | 36.80    | 441.60  |                |                    |
| 8                                |          | Įdėtinų detalių plienas S355 |       | kg        | 12     | 60.00    | 720.00  |                |                    |
| 9                                | K-1.3    | Kolona 300x300x4090          |       |           |        |          |         |                |                    |
| 10                               |          | Betonas C30/37 X0            |       | m³        | 4      | 0.368    | 1.472   |                |                    |
| 11                               |          | Armatūra S500                |       | kg        | 4      | 36.80    | 147.20  |                |                    |
| 12                               |          | Įdėtinų detalių plienas S355 |       | kg        | 4      | 60.00    | 240.00  |                |                    |
| 13                               | K-1.4    | Kolona 300x300x4090          |       |           |        |          |         |                |                    |
| 14                               |          | Betonas C30/37 X0            |       | m³        | 4      | 0.368    | 1.472   |                |                    |
| 15                               |          | Armatūra S500                |       | kg        | 4      | 36.80    | 147.20  |                |                    |
| 16                               |          | Įdėtinų detalių plienas S355 |       | kg        | 4      | 60.00    | 240.00  |                |                    |
| Viso betono, m³:                 |          |                              |       |           |        |          | 8.832   |                |                    |
| Viso armatūros, kg:              |          |                              |       |           |        |          | 883.2   |                |                    |
| Viso įdėtinų detalių plieno, kg: |          |                              |       |           |        |          | 1440.0  |                |                    |

GELŽBETONINIŲ PIRMO AUKŠTO KOLONŲ MONOLITINIMO SĄNAUDŲ KIEKIŲ ŽINIARAŠTIS

| Eil. Nr.                                   | Pozicija | Pavadinimas                      | Žymuo | Mato vnt. | Kiekis | Sąnaudos |         | Svoris vnt., t | Papildomi duomenys |
|--------------------------------------------|----------|----------------------------------|-------|-----------|--------|----------|---------|----------------|--------------------|
|                                            |          |                                  |       |           |        | Vien.    | Iš viso |                |                    |
| 1                                          | K-1.1    | Kolona 300x300x4090              |       |           |        |          |         |                |                    |
| 2                                          |          | Nesitraukiantis skiedinys C30/37 |       | m³        | 4      | 0.019    | 0.074   |                |                    |
| 3                                          | K-1.2    | Kolona 300x300x4090              |       |           |        |          |         |                |                    |
| 4                                          |          | Nesitraukiantis skiedinys C30/37 |       | m³        | 12     | 0.019    | 0.222   |                |                    |
| 5                                          | K-1.3    | Kolona 300x300x4090              |       |           |        |          |         |                |                    |
| 6                                          |          | Nesitraukiantis skiedinys C30/37 |       | m³        | 4      | 0.019    | 0.074   |                |                    |
| 7                                          | K-1.4    | Kolona 300x300x4090              |       |           |        |          |         |                |                    |
| 8                                          |          | Nesitraukiantis skiedinys C30/37 |       | m³        | 4      | 0.019    | 0.074   |                |                    |
| Viso nesitraukiančio skiedinio C30/37, m³: |          |                                  |       |           |        |          | 0.444   |                |                    |

PIRMO AUKŠTO PLIENINIŲ RYŠIŲ SĄNAUDŲ KIEKIŲ ŽINIARAŠTIS

| Eil. Nr.         | Pozicija | Pavadinimas                  | Žymuo | Mato vnt. | Kiekis | Sąnaudos |         | Svoris vnt., t | Papildomi duomenys |
|------------------|----------|------------------------------|-------|-----------|--------|----------|---------|----------------|--------------------|
|                  |          |                              |       |           |        | Vien.    | Iš viso |                |                    |
| 1                | VR-1.1   | Plieniniai vertikalūs ryšiai |       |           | 4      | 170.03   | 680.12  |                |                    |
| 2                |          | Ø101.6x6, S355, L=4700       |       | kg        | 1      | 66.27    | 66.27   |                |                    |
| 3                |          | Ø88.9x5, S355, L=2525        |       | kg        | 2      | 26.01    | 52.02   |                |                    |
| 4                |          | Ø88.9x5, S355, L=1212        |       | kg        | 2      | 12.49    | 24.98   |                |                    |
| 5                |          | Ø88.9x5, S355, L=1299        |       | kg        | 2      | 13.38    | 26.76   |                |                    |
| Viso plieno, kg: |          |                              |       |           |        |          | 680.12  |                |                    |

MONOLITINIŲ LAIPTINIŲ/LIFTO ŠACHTŲ/STANDUMO SIENŲ SĄNAUDŲ KIEKIŲ ŽINIARAŠTIS

| Eil. Nr.                         | Pozicija | Pavadinimas                     | Žymuo | Mato vnt. | Kiekis | Sąnaudos |         | Svoris vnt., t | Papildomi duomenys |
|----------------------------------|----------|---------------------------------|-------|-----------|--------|----------|---------|----------------|--------------------|
|                                  |          |                                 |       |           |        | Vien.    | Iš viso |                |                    |
| 1                                |          | Laiptinės/lifto standumo sienos |       |           |        |          |         |                |                    |
| 2                                |          | Betonas C30/37 X0               |       | m³        | 1      | -        | 25.200  |                |                    |
| 3                                |          | Armatūra S500                   |       | kg        | 1      | -        | 2520.0  |                |                    |
| 4                                |          | Įdėtinų detalių plienas S355    |       | kg        | 1      | -        | 1200.0  |                |                    |
| 5                                |          | Standumo bloko perdangos        |       |           |        |          |         |                |                    |
| 6                                |          | Betonas C30/37 X0               |       | m³        | 1      | -        | 1.100   |                |                    |
| 7                                |          | Armatūra S500                   |       | kg        | 1      | -        | 110.00  |                |                    |
| 8                                |          | Laiptai ir laiptų aikštelės     |       |           |        |          |         |                |                    |
| 9                                |          | Betonas C30/37 X0               |       | m³        | 1      | -        | 2.600   |                |                    |
| 10                               |          | Armatūra S500                   |       | kg        | 1      | -        | 260.00  |                |                    |
| Viso betono, m³:                 |          |                                 |       |           |        |          | 28.900  |                |                    |
| Viso armatūros, kg:              |          |                                 |       |           |        |          | 2890.0  |                |                    |
| Viso įdėtinų detalių plieno, kg: |          |                                 |       |           |        |          | 1200.0  |                |                    |

|                            |                                                                                                                   |                                                                                                                                       |         |                       |                                                                                      |  |       |      |
|----------------------------|-------------------------------------------------------------------------------------------------------------------|---------------------------------------------------------------------------------------------------------------------------------------|---------|-----------------------|--------------------------------------------------------------------------------------|--|-------|------|
| KVAL.<br>PATV.<br>DOK. NR. |                              | UAB "Konstrukcijų pasaulis"                                                                                                           |         |                       | STATINIO PROJEKTO PAVADINIMAS                                                        |  |       |      |
|                            |                                                                                                                   | Jonavos g. 260, Kaunas<br>Įm. k.: 304690224<br>Tel. +370 (613) 98089<br>El.p.: k.pazereckas@gmail.com<br>www.konstrukciju-pasaulis.lt |         |                       | Negyvenamasis 2 aukštų surenkamo gelžbetonio konstrukcijų mokslo paskirties pastatas |  |       |      |
|                            |                                                                                                                   |                                                                                                                                       |         |                       |                                                                                      |  |       |      |
| 37603                      | PDV                                                                                                               | Kęstutis Pažereckas                                                                                                                   | 2018 08 | DOKUMENTO PAVADINIMAS |                                                                                      |  | LAIDA |      |
| 37603                      | Konstr.                                                                                                           | Kęstutis Pažereckas                                                                                                                   | 2018 08 | Pirmo aukšto planas   |                                                                                      |  | O     |      |
|                            |                                                                                                                   |                                                                                                                                       |         |                       |                                                                                      |  |       |      |
| LT                         | UŽSAKOVAS                                                                                                         |                                                                                                                                       |         | BRĖŽINIO ŽYMUO        |                                                                                      |  | LAPAS | LAPŲ |
|                            | Miškų institutas, Lietuvos agrarinių ir miškų mokslų centro filialas, Liepų g. 1, Girionių k., LT-53101, Kauno r. |                                                                                                                                       |         | KPRS18/02-TP-SK-1.7   |                                                                                      |  | 1     | 1    |
|                            |                                                                                                                   |                                                                                                                                       |         |                       |                                                                                      |  |       |      |

surenkama g/b kolona

4 vnt. kolonos "batai"  
Peikko HPKM20/HPKM24

Nesitraukiantis betono skiedinys  
ne žemesnės kaip C30/37  
ir kolonos betono klasės

A

50

85

65

50

200

4 vnt. inkariniai varžtai  
Peikko HPM20L/HPM24L/HPM30L

pamato viršaus alt.

pamatas

Technical drawing of a square plate with a central cross pattern and four circular holes. The plate has a total width and height of 300 units. The central cross pattern is defined by a 100x100 unit square with a 50x50 unit square in the center. The four circular holes are located at the corners of the plate, with a diameter of 50 units. The distance from the center of each hole to the nearest edge is 50 units. The drawing includes dimension lines and numerical values indicating the sizes and positions of the features.

|                            |                                                                                                                                   |         |                                                                                                                                                                             |                                       |                                                                                                                          |            |           |
|----------------------------|-----------------------------------------------------------------------------------------------------------------------------------|---------|-----------------------------------------------------------------------------------------------------------------------------------------------------------------------------|---------------------------------------|--------------------------------------------------------------------------------------------------------------------------|------------|-----------|
| KVAL.<br>PATV.<br>DOK. NR. |                                              |         | <b>UAB "Konstrukcijų pasaulis"</b><br>Jonavos g. 260, Kaunas<br>Įm. k.: 304690224<br>Tel. +370 (613) 98089<br>El.p.: k.pazereckas@gmail.com<br>www.konstrukciju-pasaulis.lt |                                       | STATINIO PROJEKTO PAVADINIMAS<br>Negyvenamasis 2 aukštų surenkamo gelžbetonio konstrukcijų<br>mokslo paskirties pastatas |            |           |
|                            | 37603                                                                                                                             | PDV     | Kęstutis Pažereckas                                                                                                                                                         | 2018 08                               | DOKUMENTO PAVADINIMAS                                                                                                    |            | LAIDA     |
|                            | 37603                                                                                                                             | Konstr. | Kęstutis Pažereckas                                                                                                                                                         | 2018 08                               | Kolonų ir pamato principinis jungimo mazgas                                                                              |            | O         |
|                            |                                                                                                                                   |         |                                                                                                                                                                             |                                       |                                                                                                                          |            |           |
| LT                         | UŽSAKOVAS<br>Miškų institutas, Lietuvos agrarinių ir miškų mokslų<br>centro filialas, Liepų g. 1, Girionių k., LT-53101, Kauno r. |         |                                                                                                                                                                             | BRĖŽINIO ŽYMUO<br>KPRS18/02-TP-SK-1.8 |                                                                                                                          | LAPAS<br>1 | LAPŲ<br>1 |

PIRMO AUKŠTO PERDANGOS RYGELIŲ PLANAS MASTELIS 1:100

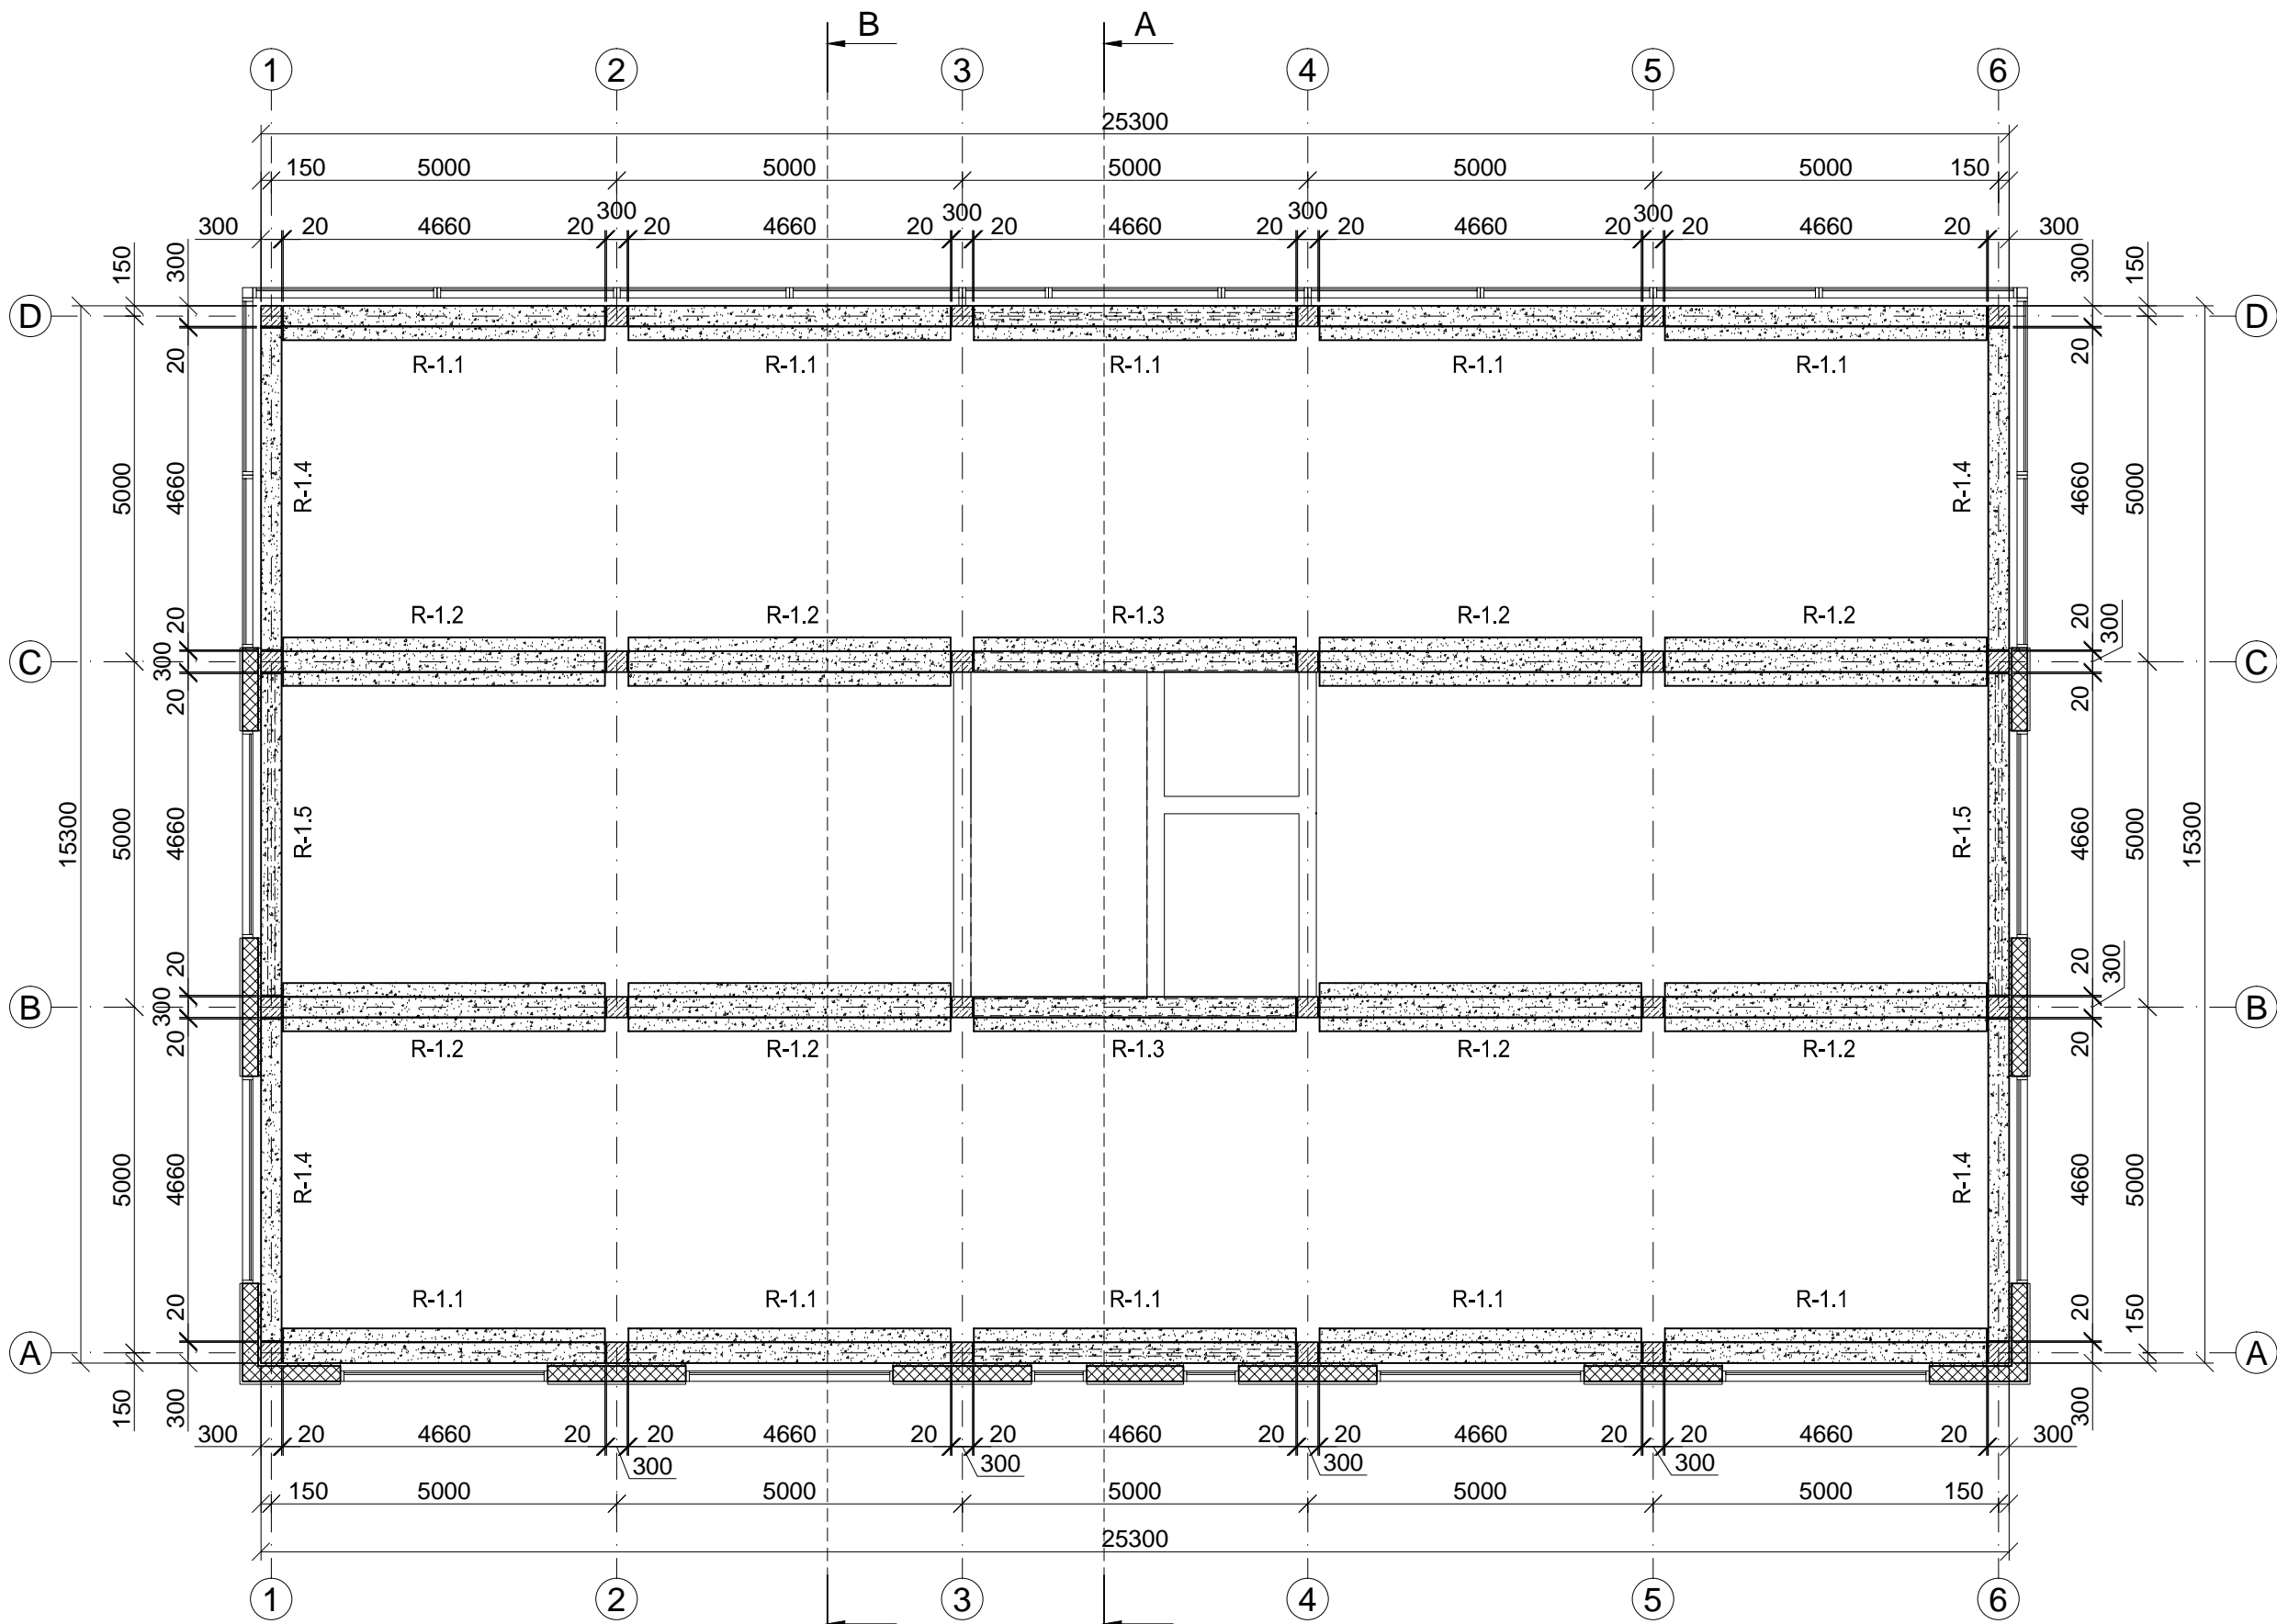

ŽYMĖJIMAS:  
R-... - Gelžbetoninis rygelis;

RYGELIŲ IR KRAŠTINIŲ VIRŠUTINIŲ KOLONŲ JUNGIMO MAZGAS M 1:10

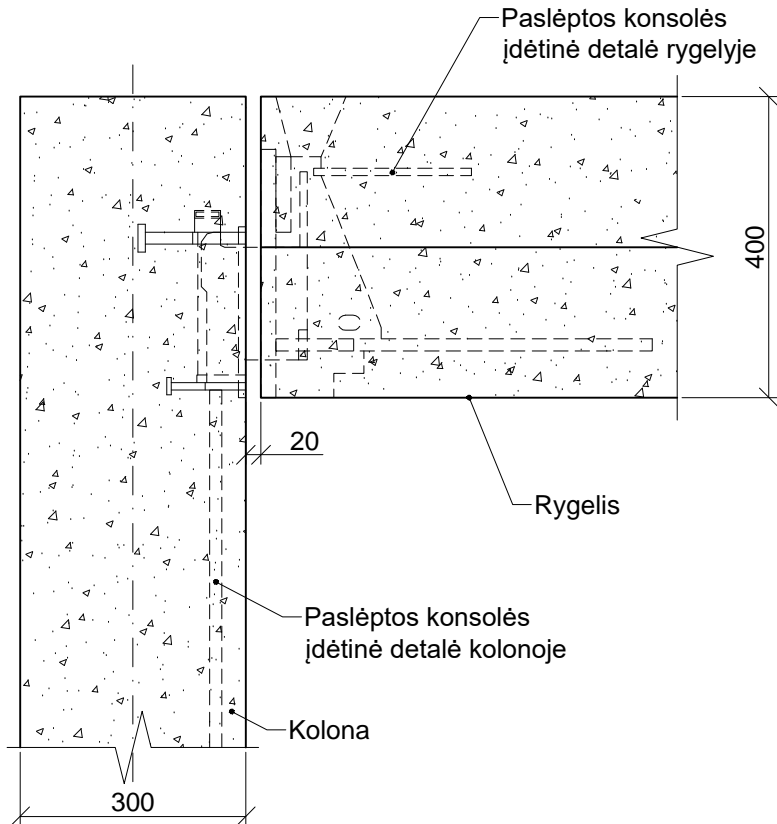

- PASTABOS:
- Surenkamų g/b rygelių montavimui ant kolonų naudojamos paslėptos plieninės jungtys.
  - Surenkamų g/b rygelių įdėtinės detalės projektuojamos darbo projekto stadijoje.
  - Gelžbetoniniams rygeliams naudojamas C30/37,X0 stiprumo klasės betonas, pagal LST EN 206-1:2002.
  - Gelžbetoniniai rygeliai armuojami S500 stiprumo klasės armatūros strypynais, pagal LST EN ISO 15630-1:2010. Gelžbetoninių rygelių išilginė armatūra sujungiama užleidimu, prakeičiant ne mažiau 40-d (d - didesnio iš jungiamų strypų skersmuo).
  - Gelžbetonio rygelių atsparumas ugniai R45 min.
  - Monolitinėms laiptinių ir lifto šachtų standumo sienoms naudojamas C30/37 X0 klasės betonas, pagal LST EN 206-1:2002.
  - Monolitiniai elementai armuojami S500 stiprumo klasės armatūros tinklais ir/ar strypynais, pagal LST EN ISO 15630-1:2010.
  - Darbai vykdomi pagal darbo projektą.

GELŽBETONINIŲ 1 AUKŠTO RYGELIŲ SAŃAUDŲ KIEKIŲ ŽINIARAŠTIS

| Eil. Nr.                          | Pozicija | Pavadinimas                   | Žymuo | Mato vnt. | Kiekis | SaŃaudos |         | Svoris vnt., t | Papildomi duomenys |
|-----------------------------------|----------|-------------------------------|-------|-----------|--------|----------|---------|----------------|--------------------|
|                                   |          |                               |       |           |        | Vien.    | Iš viso |                |                    |
| 1                                 | R-1.1    | Rygelis L500x400x4660         |       |           |        |          |         |                |                    |
| 2                                 |          | Betonas C30/37 X0             |       | m³        | 10     | 0.746    | 7.460   |                |                    |
| 3                                 |          | Armatūra S500                 |       | kg        | 10     | 89.52    | 895.2   |                |                    |
| 4                                 |          | Įdėtinių detalių plienas S355 |       | kg        | 10     | 50       | 500.00  |                |                    |
| 5                                 | R-1.2    | Rygelis T700x400x4660         |       |           |        |          |         |                |                    |
| 6                                 |          | Betonas C30/37 X0             |       | m³        | 8      | 0.932    | 7.456   |                |                    |
| 7                                 |          | Armatūra S500                 |       | kg        | 8      | 111.84   | 894.72  |                |                    |
| 8                                 |          | Įdėtinių detalių plienas S355 |       | kg        | 8      | 50       | 400.00  |                |                    |
| 9                                 | R-1.3    | Rygelis L500x400x4660         |       |           |        |          |         |                |                    |
| 10                                |          | Betonas C30/37 X0             |       | m³        | 2      | 0.746    | 1.492   |                |                    |
| 11                                |          | Armatūra S500                 |       | kg        | 2      | 89.52    | 179.04  |                |                    |
| 12                                |          | Įdėtinių detalių plienas S355 |       | kg        | 2      | 50       | 100.00  |                |                    |
| 13                                | R-1.4    | Rygelis 300x400x4660          |       |           |        |          |         |                |                    |
| 14                                |          | Betonas C30/37 X0             |       | m³        | 4      | 0.559    | 2.236   |                |                    |
| 15                                |          | Armatūra S500                 |       | kg        | 4      | 67.08    | 268.32  |                |                    |
| 16                                |          | Įdėtinių detalių plienas S355 |       | kg        | 4      | 40       | 160.00  |                |                    |
| 17                                | R-1.5    | Rygelis 300x400x4660          |       |           |        |          |         |                |                    |
| 18                                |          | Betonas C30/37 X0             |       | m³        | 2      | 0.559    | 1.118   |                |                    |
| 19                                |          | Armatūra S500                 |       | kg        | 2      | 67.08    | 134.16  |                |                    |
| 20                                |          | Įdėtinių detalių plienas S355 |       | kg        | 2      | 50       | 100.00  |                |                    |
| Viso betono, m³:                  |          |                               |       |           |        | 19.762   |         |                |                    |
| Viso armatūros, kg:               |          |                               |       |           |        | 2374.8   |         |                |                    |
| Viso įdėtinių detalių plieno, kg: |          |                               |       |           |        | 1260.0   |         |                |                    |

RYGELIŲ IR VIDURINIŲ KOLONŲ JUNGIMO MAZGAS M 1:10

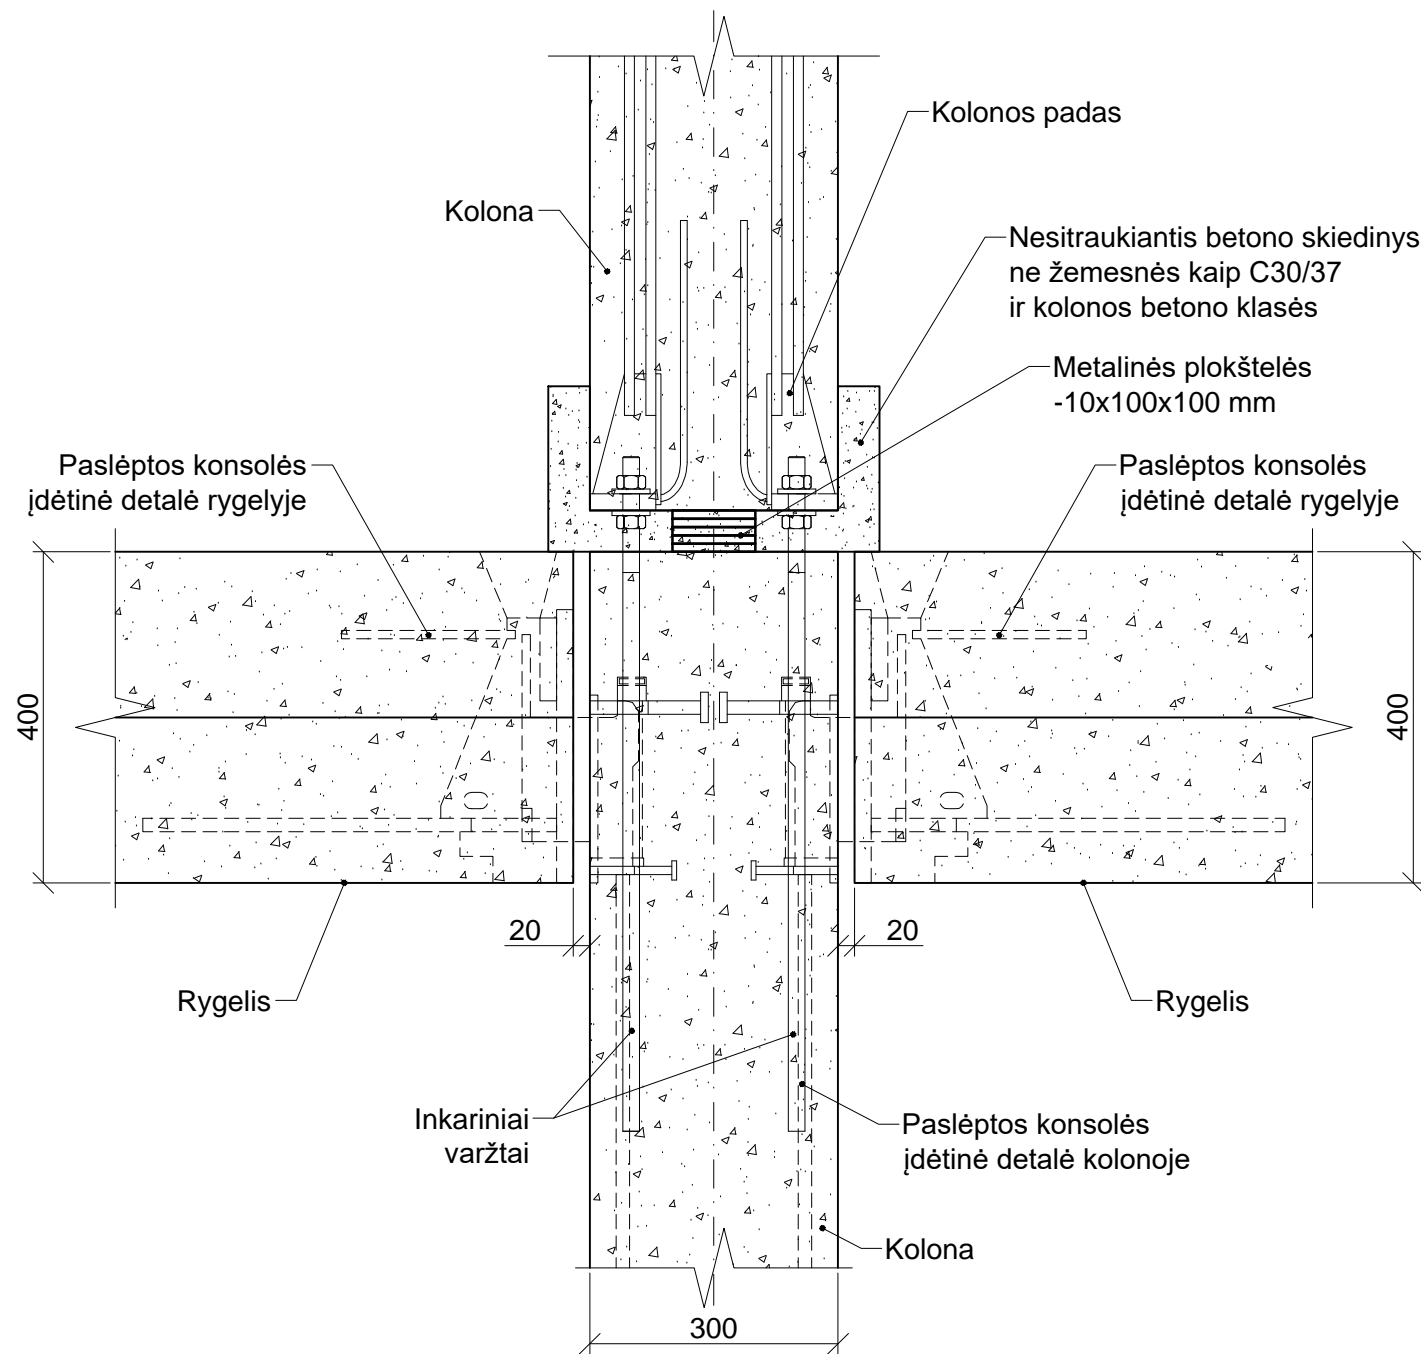

|                            |                                                                                                                   |                                                                                                                                       |         |                                                                                      |  |       |
|----------------------------|-------------------------------------------------------------------------------------------------------------------|---------------------------------------------------------------------------------------------------------------------------------------|---------|--------------------------------------------------------------------------------------|--|-------|
| KVAL.<br>PATV.<br>DOK. NR. |                                                                                                                   | UAB "Konstrukcijų pasaulis"                                                                                                           |         | STATINIO PROJEKTO PAVADINIMAS                                                        |  |       |
|                            |                                                                                                                   | Jonavos g. 260, Kaunas<br>Įm. k.: 304690224<br>Tel. +370 (613) 98089<br>El.p.: k.pazereckas@gmail.com<br>www.konstrukciju-pasaulis.lt |         | Negyvenamasis 2 aukštų surenkamo gelžbetonio konstrukcijų mokslo paskirties pastatas |  |       |
|                            |                                                                                                                   |                                                                                                                                       |         |                                                                                      |  |       |
| 37603                      | PDV                                                                                                               | Kęstutis Pažereckas                                                                                                                   | 2018 08 | DOKUMENTO PAVADINIMAS                                                                |  | LAIDA |
| 37603                      | Konstr.                                                                                                           | Kęstutis Pažereckas                                                                                                                   | 2018 08 | Pirmo aukšto perdangos rygielių planas                                               |  | O     |
|                            |                                                                                                                   |                                                                                                                                       |         |                                                                                      |  |       |
| LT                         | UŽSAKOVAS                                                                                                         |                                                                                                                                       |         | BRĖŽINIO ŽYMUO                                                                       |  | LAPAS |
|                            | Miškų institutas, Lietuvos agrarinių ir miškų mokslų centro filialas, Liepų g. 1, Girionių k., LT-53101, Kauno r. |                                                                                                                                       |         | KPRS18/02-TP-SK-1.9                                                                  |  | LAPŲ  |
|                            |                                                                                                                   |                                                                                                                                       |         |                                                                                      |  | 1 1   |



Architectural floor plan of a building with a central corridor and two wings. The plan shows a grid of rooms, each labeled "PP. 20.120.460-7.0". The central corridor is labeled "CORRIDOR". The plan includes dimensions for the overall building (25300 x 15300) and individual rooms (7x1200=8400, 3x1200=3600, 2x1200=2400). The plan is oriented with North (N) at the top.

KIAURYMĖTOSIOS DENGINIO PLOKŠTĖS ATRĖMIMAS  
ANT T FORMOS SKERSPJŪVIO RYGELIO M 1:10  
principinis mazgas

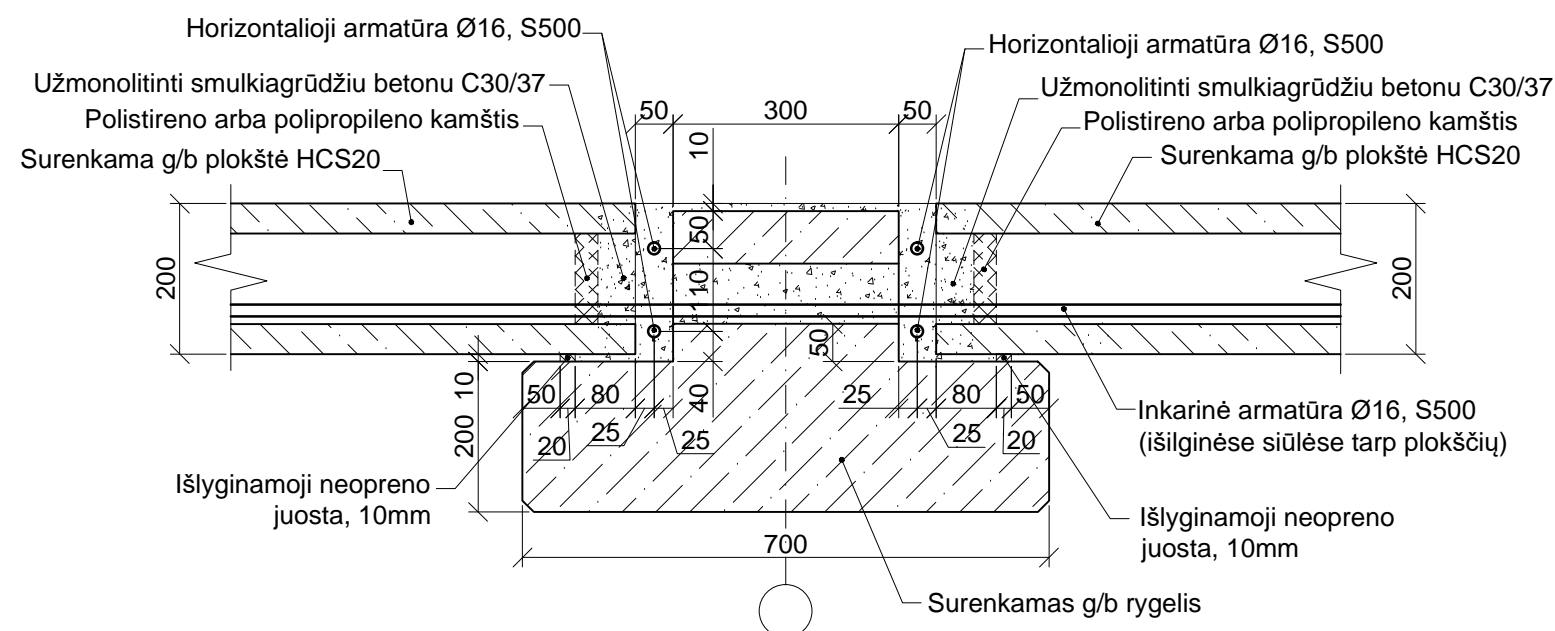

Horizontalioji armatūra  
Ø16, S500

Užmonolitinti smulkiagrūdžiu betonu C30/37

Polistireno arba polipropileno kamštis

Surenkama g/b plokštė HCS20

200

300

50

50

25

80

25

20

50

10

200

400

250

Surenkamas  
g/b rygelis

Išlyginamoji  
neopreno  
juosta, 10mm

Inkarinė armatūra  
(išilginėse siūlėse tarp plokščių)

2Ø16, S500  
privirtos,  $k_1=6$

Ø16, S500

150

1140

| Eil. Nr.                   | Pozicija | Pavadinimas                 | Žymuo | Mato vnt. | Kiekis | Sąnaudos |               | Svoris vnt., t | Papildomi duomenys |
|----------------------------|----------|-----------------------------|-------|-----------|--------|----------|---------------|----------------|--------------------|
|                            |          |                             |       |           |        | Vien.    | Iš viso       |                |                    |
| 1                          |          | <b>PP.20.120.460-7.0</b>    |       | vnt       | 54     |          |               | 1.750          | 94.5 t (viso)      |
| 2                          |          | Betonas C30/37 X0           |       | m³        | 54     | 0.700    | 37.800        |                |                    |
| 3                          |          | Armatūra A800               |       | kg        | 54     | 35.00    | 1890.0        |                |                    |
| 4                          |          | <b>PP.20.60.460-7.0</b>     |       | vnt       | 6      |          |               | 0.875          | 5.25 t (viso)      |
| 5                          |          | Betonas C30/37 X0           |       | m³        | 6      | 0.350    | 2.100         |                |                    |
| 6                          |          | Armatūra A800               |       | kg        | 6      | 17.50    | 105.00        |                |                    |
| 7                          |          | <b>Plokščių monolitinis</b> |       |           |        |          |               |                |                    |
| 8                          |          | Betonas C30/37 X0           |       | m³        | -      | -        | 4.500         |                |                    |
| 9                          |          | Armatūra S500               |       | kg        | -      | -        | 450.0         |                |                    |
| <b>Viso betono, m³:</b>    |          |                             |       |           |        |          | <b>44.400</b> |                |                    |
| <b>Viso armatūros, kg:</b> |          |                             |       |           |        |          | <b>2445.0</b> |                |                    |

| Eil. Nr. | Pozicija | Pavadinimas                  | Žymuo | Mato vnt.      | Kiekis | Sanaudos Vien.                       | Iš viso | Svoris vnt., t | Papildomi duomenys |
|----------|----------|------------------------------|-------|----------------|--------|--------------------------------------|---------|----------------|--------------------|
| 1        |          | Išlyginamasis sluoksnis 60mm |       | m <sup>2</sup> | 360.0  |                                      |         |                |                    |
| 2        |          | Betonas C25/30 X0            |       | m <sup>3</sup> | -      | 21.600                               | 21.600  |                |                    |
| 3        |          | Armatura S500                |       | kg             | -      | 530.0                                | 530.0   |                |                    |
|          |          |                              |       |                |        | Viso betono, m <sup>2</sup> : 21.600 |         |                |                    |
|          |          |                              |       |                |        | Viso armatūros, kg: 530.0            |         |                |                    |

PASTABOS:

1. Surenkamos g/b plokštės ir monolitinės perdangos ant ryglių atremiamos ne mažiau kaip 150 mm.
2. Visos perdangos plokštės inkuruojamos tarpusavyje, monolitiniuose ruožuose ir rygliuose.
3. Tarpai tarp plokščių užtaisomi C30/37 klasės betonu.
4. Monolitinėms perdangoms naudojamas C30/37 stiprumo klasės betonas, pagal LST EN 206-1:2002.
5. Perdangos armuojamos S500 stiprumo klasės armatūros tinklais ir strypais, pagal LST EN ISO 15630-1:2003.
6. Surenkamos perdangos plokštės atitinka UAB "Betonika" gaminių sortimentą (gali būti pakeistos analogiškų parametrų plokštėmis).
7. Perdangos atsparumas ugniai REI 45 min.

|                            |                                                                                                                                   |                                                                                                                                                                       |         |                     |                                                                                                                       |                               |       |       |
|----------------------------|-----------------------------------------------------------------------------------------------------------------------------------|-----------------------------------------------------------------------------------------------------------------------------------------------------------------------|---------|---------------------|-----------------------------------------------------------------------------------------------------------------------|-------------------------------|-------|-------|
| KVAL.<br>PATV.<br>DOK. NR. |                                              | UAB "Konstrukcijų pasaulis"<br>Jonavos g. 260, Kaunas<br>Įm. k.: 304690224<br>Tel. +370 (613) 98089<br>El.p.: k.pastereckas@gmail.com<br>www.konstrukciju-pasaulis.lt |         |                     | STATINIO PROJEKTO PAVADINIMAS<br>Negyvenamasis 2 aukštų surenkamo gelžbetonio konstrukcijų<br>mokslo pastatų pastatas |                               |       |       |
|                            |                                                                                                                                   | 37603                                                                                                                                                                 | PDV     | Kęstutis Pažereckas | 2018 08                                                                                                               | DOKUMENTO PAVADINIMAS         |       | LAIKA |
|                            |                                                                                                                                   | 37603                                                                                                                                                                 | Konstr. | Kęstutis Pažereckas | 2018 08                                                                                                               | Pirmo aukšto perdangos planas |       | O     |
|                            |                                                                                                                                   |                                                                                                                                                                       |         |                     |                                                                                                                       |                               |       |       |
| LT                         | UŽSAKOVAS<br>Miškų institutas, Lietuvos agrarinių ir miškų mokslų<br>centro filialas. Liepų g. 1, Girionių k., LT-53101, Kauno r. |                                                                                                                                                                       |         |                     | BRĖŽINIO ŽYMUO<br>KPRS18/02-TP-SK-1.10                                                                                |                               | LAPAS | LAPŲ  |
|                            |                                                                                                                                   |                                                                                                                                                                       |         |                     |                                                                                                                       |                               | 1     | 1     |

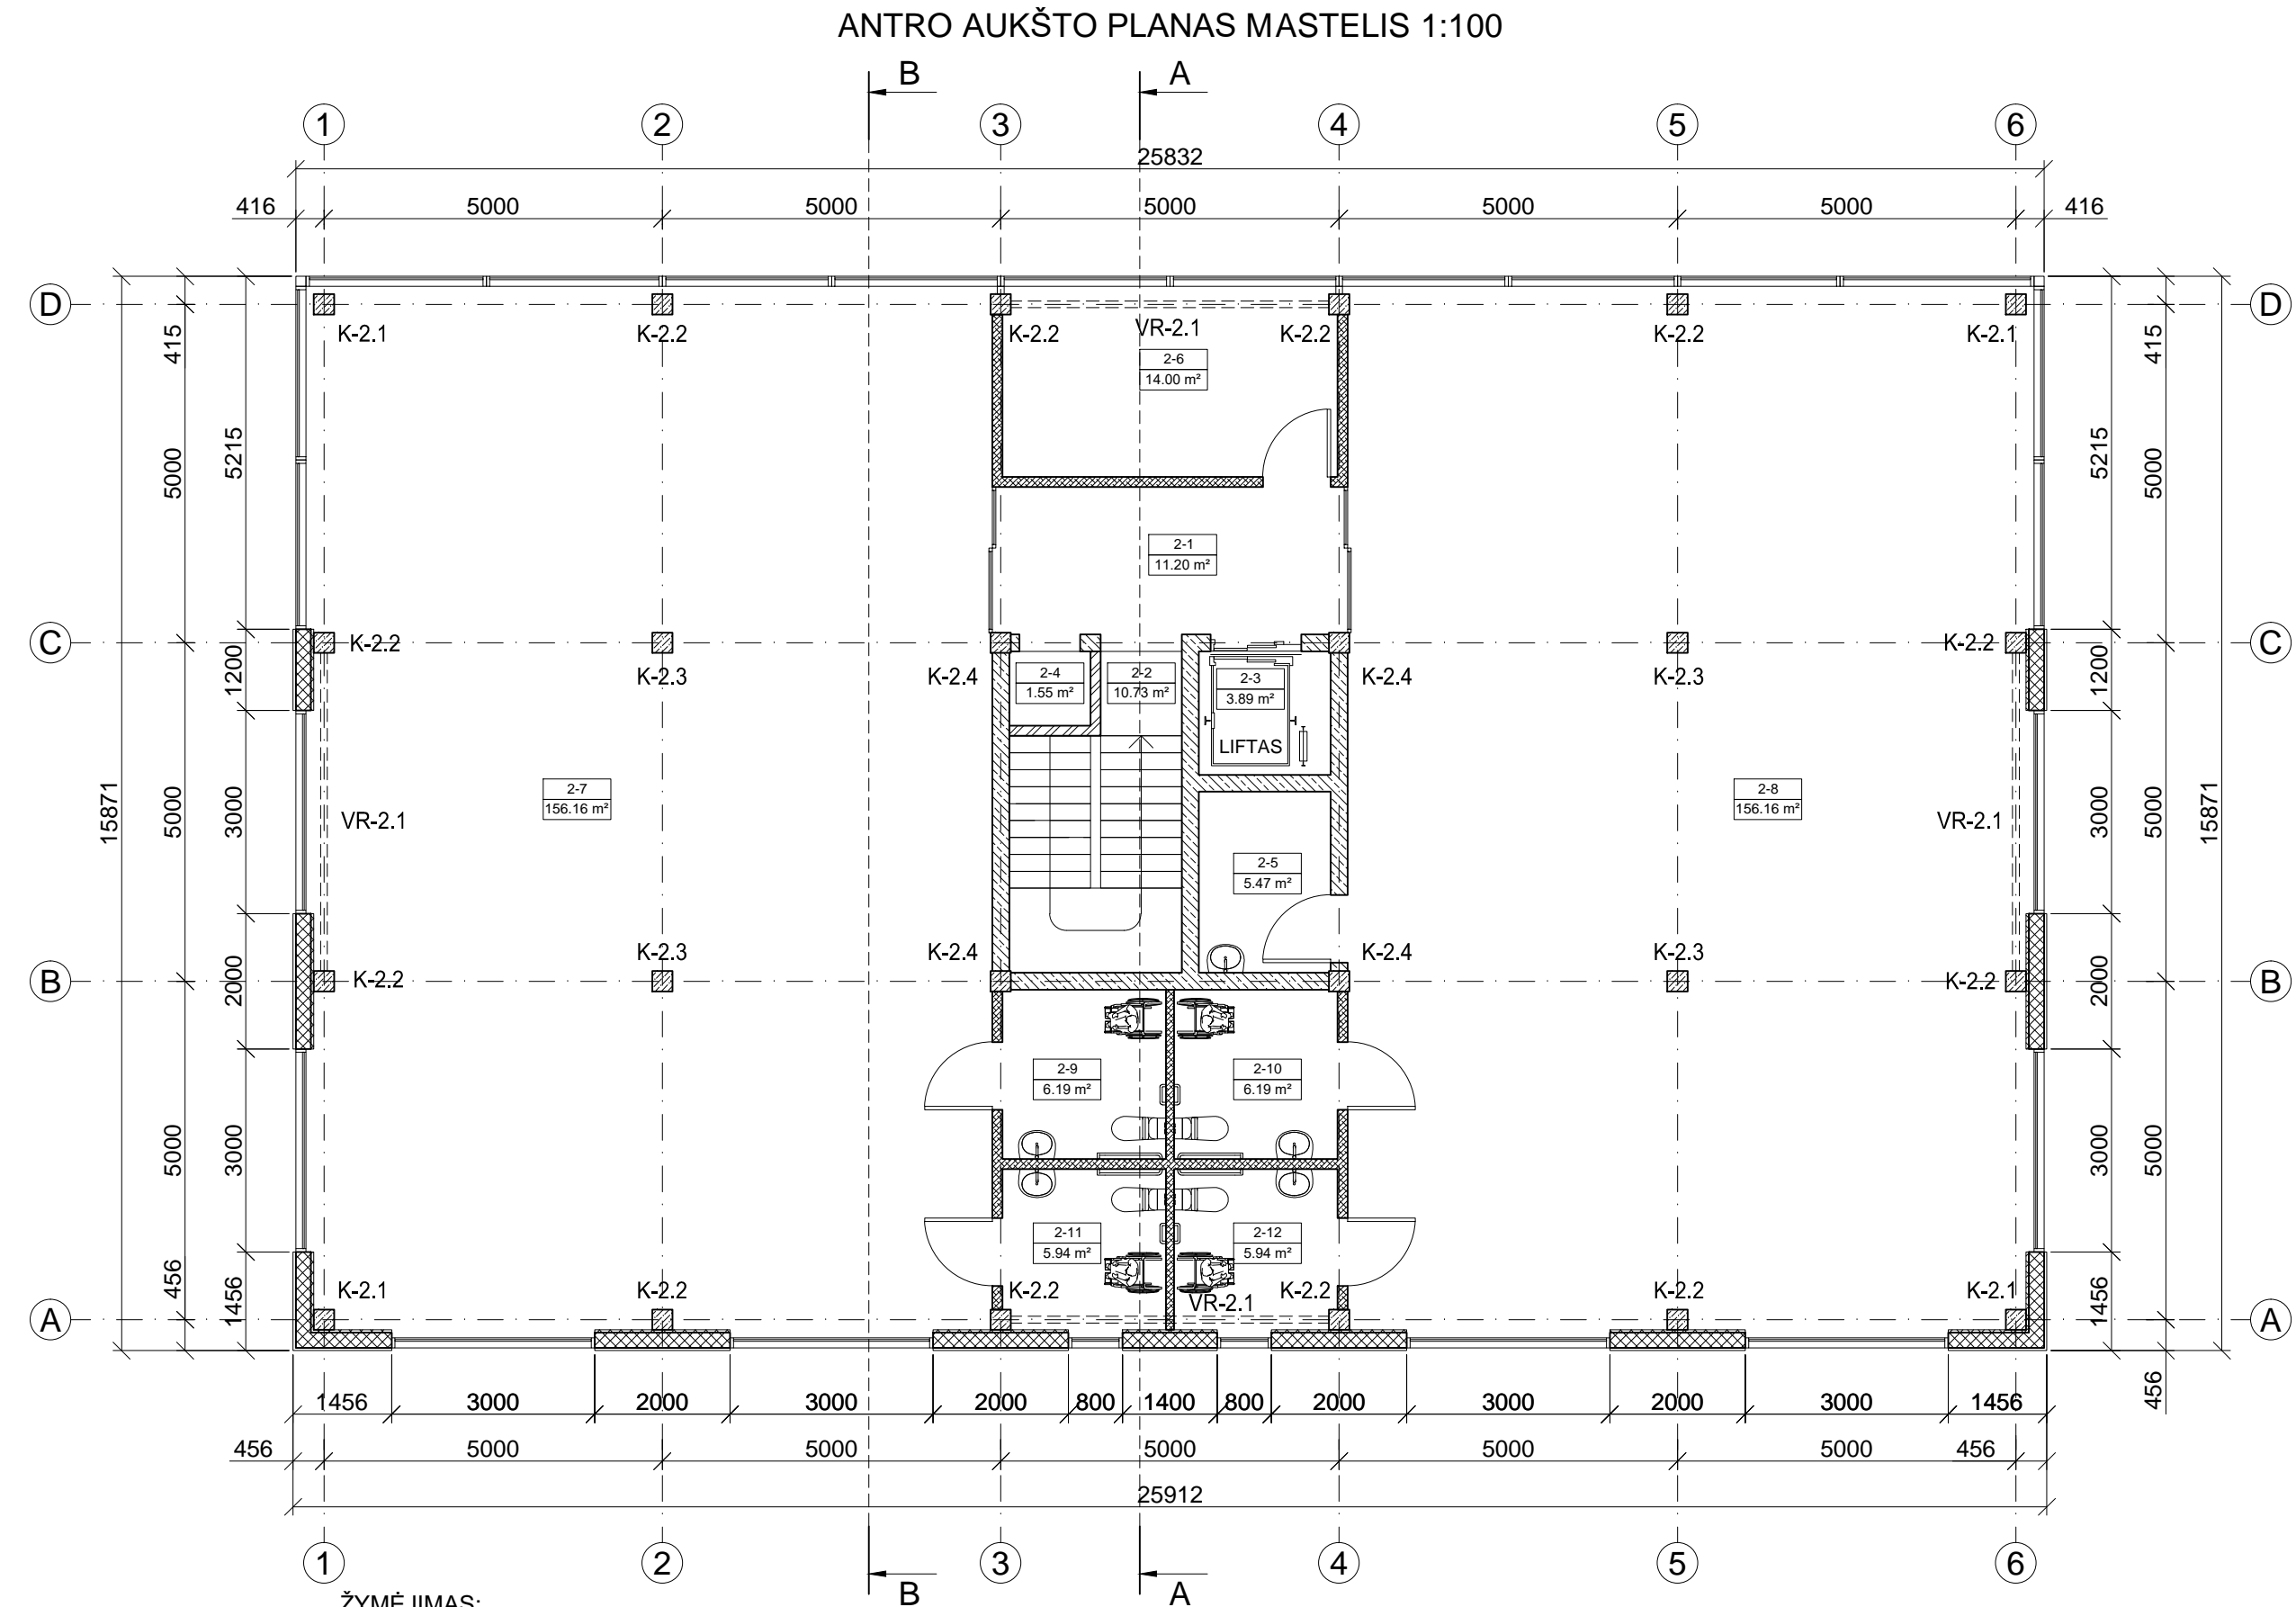

ŽYMĖJIMAS:  
K-... - Gelžbetoninė surenkama kolona;  
VR-... - Plieniniai vertikalieji ryšiai;

PASTABOS:

- Surenkamų g/b kolonų tarpusavio sujungimams naudojami inkariniai varžtai ir kolonų padai.
- Surenkamų g/b kolonų įdėtinės detalės projektuojamos darbo projekto studijoje.
- Gelžbetoninėms kolonoms naudojamas C30/37, F150, XC1 stiprumo klasės betonas, pagal LST EN 206-1:2002.
- Gelžbetoninės kolonos armuojamos S500 stiprumo klasės armatūros strypynais, pagal LST EN ISO 15630-1:2010. Gelžbetoninių kolonų išilginė armatūra sujungiama užleidimu, prakeičiant ne mažiau 40·d (d - didesnio iš jungiamųjų strypų skersmuo).
- Gelžbetonio kolonų atsparumas ugniai R45 min.
- Monolitinėms laiptinių ir lifto šachtų standumo sienoms naudojamas C30/37 X0 klasės betonas, pagal LST EN 206-1:2002.
- Monolitiniai elementai armuojami S500 stiprumo klasės armatūros tinklais ir/ar strypynais, pagal LST EN ISO 15630-1:2010.
- Metalinėms konstrukcijoms ir elementams naudojamas S355 stiprumo klasės plienas.
- Suvirinimo jungčių briaunų paruošimas turi būti atliekamas pagal EN ISO 9692-1.
- Metaliniai elementai tarpusavyje suvirinami, siūlės aukštis 1,2·kf - plonesniojo iš jungiamųjų elementų storis (jei nenurodyta kitaip), pagal LST EN ISO 9692-1:2004.
- Konstrukcijų suvirinimui naudojamos suvirinimo medžiagos užtikrinančios suvirinimo siūlės skaičiuojamuosius stiprius ne mažesnius nei suvirinamo metalo.
- Metaliniai paviršiai gruntuojami ir dažomi, pagal LST EN ISO 12944-2:2000.
- Skylės varžtams daromos 2 mm didesnės nei varžto diameteras (jei brėžinyje nenurodyta kitaip).
- Darbai vykdomi pagal darbo projektą.

| Patalpų eksplikacija |                  |           |
|----------------------|------------------|-----------|
| Numeris              | Patalpa          | Plotas    |
| 2-1                  | Fojė             | 11.20 m²  |
| 2-2                  | Laiptinė         | 10.73 m²  |
| 2-3                  | Lifto šachta     | 3.89 m²   |
| 2-4                  | Tech. patalpa    | 1.55 m²   |
| 2-5                  | Tech. patalpa    | 5.47 m²   |
| 2-6                  | Tech. patalpa    | 14.00 m²  |
| 2-7                  | Įstaigų patalpos | 156.16 m² |
| 2-8                  | Įstaigų patalpos | 156.16 m² |
| 2-9                  | San. mazgas      | 6.19 m²   |
| 2-10                 | San. mazgas      | 6.19 m²   |
| 2-11                 | San. mazgas      | 5.94 m²   |
| 2-12                 | San. mazgas      | 5.94 m²   |
| Viso aukšte:         |                  | 383.42 m² |
| Viso pastate:        |                  | 767.58 m² |

GELŽBETONINIŲ ANTRO AUKŠTO KOLONŲ SĄNAUDŲ KIEKIŲ ŽINIARAŠTIS

| Eil. Nr.                          | Pozicija | Pavadinimas                   | Žymuo | Mato vnt. | Kiekis | Sąnaudos |         | Svoris vnt., t | Papildomi duomenys |
|-----------------------------------|----------|-------------------------------|-------|-----------|--------|----------|---------|----------------|--------------------|
|                                   |          |                               |       |           |        | Vien.    | Iš viso |                |                    |
| 1                                 | K-2.1    | Kolona 300x300x3510           |       |           |        |          |         |                |                    |
| 2                                 |          | Betonas C30/37 X0             |       | m³        | 4      | 0.316    | 1.264   |                |                    |
| 3                                 |          | Armatūra S500                 |       | kg        | 4      | 31.60    | 126.40  |                |                    |
| 4                                 |          | Įdėtinių detalių plienas S355 |       | kg        | 4      | 60.00    | 240.00  |                |                    |
| 5                                 | K-2.2    | Kolona 300x300x3510           |       |           |        |          |         |                |                    |
| 6                                 |          | Betonas C30/37 X0             |       | m³        | 12     | 0.316    | 3.792   |                |                    |
| 7                                 |          | Armatūra S500                 |       | kg        | 12     | 31.60    | 379.20  |                |                    |
| 8                                 |          | Įdėtinių detalių plienas S355 |       | kg        | 12     | 60.00    | 720.00  |                |                    |
| 9                                 | K-2.3    | Kolona 300x300x3510           |       |           |        |          |         |                |                    |
| 10                                |          | Betonas C30/37 X0             |       | m³        | 4      | 0.316    | 1.264   |                |                    |
| 11                                |          | Armatūra S500                 |       | kg        | 4      | 31.60    | 126.40  |                |                    |
| 12                                |          | Įdėtinių detalių plienas S355 |       | kg        | 4      | 60.00    | 240.00  |                |                    |
| 13                                | K-2.4    | Kolona 300x300x3510           |       |           |        |          |         |                |                    |
| 14                                |          | Betonas C30/37 X0             |       | m³        | 4      | 0.316    | 1.264   |                |                    |
| 15                                |          | Armatūra S500                 |       | kg        | 4      | 31.60    | 126.40  |                |                    |
| 16                                |          | Įdėtinių detalių plienas S355 |       | kg        | 4      | 60.00    | 240.00  |                |                    |
| Viso betono, m³:                  |          |                               |       |           |        |          | 7.584   |                |                    |
| Viso armatūros, kg:               |          |                               |       |           |        |          | 758.40  |                |                    |
| Viso įdėtinių detalių plieno, kg: |          |                               |       |           |        |          | 1440.0  |                |                    |

GELŽBETONINIŲ ANTRO AUKŠTO KOLONŲ MONOLITINIMO SĄNAUDŲ KIEKIŲ ŽINIARAŠTIS

| Eil. Nr.                                   | Pozicija | Pavadinimas                      | Žymuo | Mato vnt. | Kiekis | Sąnaudos |         | Svoris vnt., t | Papildomi duomenys |
|--------------------------------------------|----------|----------------------------------|-------|-----------|--------|----------|---------|----------------|--------------------|
|                                            |          |                                  |       |           |        | Vien.    | Iš viso |                |                    |
| 1                                          | K-2.1    | Kolona 300x300x3510              |       |           |        |          |         |                |                    |
| 2                                          |          | Nesitraukiantis skiedinys C30/37 |       | m³        | 4      | 0.019    | 0.074   |                |                    |
| 3                                          | K-2.2    | Kolona 300x300x3510              |       |           |        |          |         |                |                    |
| 4                                          |          | Nesitraukiantis skiedinys C30/37 |       | m³        | 12     | 0.019    | 0.222   |                |                    |
| 5                                          | K-2.3    | Kolona 300x300x3510              |       |           |        |          |         |                |                    |
| 6                                          |          | Nesitraukiantis skiedinys C30/37 |       | m³        | 4      | 0.019    | 0.074   |                |                    |
| 7                                          | K-2.4    | Kolona 300x300x3510              |       |           |        |          |         |                |                    |
| 8                                          |          | Nesitraukiantis skiedinys C30/37 |       | m³        | 4      | 0.019    | 0.074   |                |                    |
| Viso nesitraukiančio skiedinio C30/37, m³: |          |                                  |       |           |        |          | 0.444   |                |                    |

ANTRO AUKŠTO PLIENINIŲ RYŠIŲ SĄNAUDŲ KIEKIŲ ŽINIARAŠTIS

| Eil. Nr.         | Pozicija | Pavadinimas                  | Žymuo | Mato vnt. | Kiekis | Sąnaudos |         | Svoris vnt., t | Papildomi duomenys |
|------------------|----------|------------------------------|-------|-----------|--------|----------|---------|----------------|--------------------|
|                  |          |                              |       |           |        | Vien.    | Iš viso |                |                    |
| 1                | VR-2.1   | Plieniniai vertikalūs ryšiai |       | vnt.      | 4      | 170.03   | 680.12  |                |                    |
| 2                |          | Ø101.6x6, S355, L=4700       |       | kg        | 1      | 66.27    | 66.27   |                |                    |
| 3                |          | Ø88.9x5, S355, L=2525        |       | kg        | 2      | 26.01    | 52.02   |                |                    |
| 4                |          | Ø88.9x5, S355, L=1212        |       | kg        | 2      | 12.49    | 24.98   |                |                    |
| 5                |          | Ø88.9x5, S355, L=1299        |       | kg        | 2      | 13.38    | 26.76   |                |                    |
| Viso plieno, kg: |          |                              |       |           |        |          | 680.12  |                |                    |

|                            |                                                                                                                   |                                                                                                                                       |         |                       |                                                                                      |  |       |      |
|----------------------------|-------------------------------------------------------------------------------------------------------------------|---------------------------------------------------------------------------------------------------------------------------------------|---------|-----------------------|--------------------------------------------------------------------------------------|--|-------|------|
| KVAL.<br>PATV.<br>DOK. NR. |                              | UAB "Konstrukcijų pasaulis"                                                                                                           |         |                       | STATINIO PROJEKTO PAVADINIMAS                                                        |  |       |      |
|                            |                                                                                                                   | Jonavos g. 260, Kaunas<br>Įm. k.: 304690224<br>Tel. +370 (613) 98089<br>El.p.: k.pazereckas@gmail.com<br>www.konstrukciju-pasaulis.lt |         |                       | Negyvenamasis 2 aukštų surenkamo gelžbetonio konstrukcijų mokslo paskirties pastatas |  |       |      |
|                            |                                                                                                                   |                                                                                                                                       |         |                       |                                                                                      |  |       |      |
| 37603                      | PDV                                                                                                               | Kęstutis Pažereckas                                                                                                                   | 2018 08 | DOKUMENTO PAVADINIMAS |                                                                                      |  | LAIDA |      |
| 37603                      | Konstr.                                                                                                           | Kęstutis Pažereckas                                                                                                                   | 2018 08 | Antro aukšto planas   |                                                                                      |  | O     |      |
|                            |                                                                                                                   |                                                                                                                                       |         |                       |                                                                                      |  |       |      |
| LT                         | UŽSAKOVAS                                                                                                         |                                                                                                                                       |         | BRĖŽINIO ŽYMUO        |                                                                                      |  | LAPAS | LAPŲ |
|                            | Miškų institutas, Lietuvos agrarinių ir miškų mokslų centro filialas, Liepų g. 1, Girionių k., LT-53101, Kauno r. |                                                                                                                                       |         | KPRS18/02-TP-SK-1.11  |                                                                                      |  | 1     | 1    |
|                            |                                                                                                                   |                                                                                                                                       |         |                       |                                                                                      |  |       |      |



Architectural floor plan of a building with a grid system. The plan shows a rectangular layout with a central corridor. The grid is labeled 1 to 6 horizontally and A to D vertically. Dimensions are provided for all grid lines. Rooms are labeled R-2.1, R-2.2, R-2.3, R-2.4, and R-2.5. The plan includes wall thicknesses, door swings, and a north arrow.

**PASTABOS:**

1. Surenkamų g/b rygielių montavimui ant kolonų naudojamoms paslėptos plieninės jungtys.
2. Surenkamų g/b rygielių įdėtinės detalės projektuojamos darbo projekto stadijoje.
3. Gelžbetoniniams rygieliams naudojamas C30/37,X0 stiprumo klasės betonas, pagal LST EN 206-1:2002.
4. Gelžbetoniniai rygeliai armuojami S500 stiprumo klasės armatūros strypynais, pagal LST EN ISO 15630-1:2010. Gelžbetoninių rygielių išilginė armatūra sujungiama užleidimu, prakeičiant ne mažiau 40 d (d - didesnio iš jungiamų strypų skersmuo).
5. Gelžbetonio rygielių atsparumas ugniai R45 min.
6. Monolitiniams laiptiniui ir lifto šachtų standumo sienoms naudojamas C30/37 X0 klasės betonas, pagal LST EN 206-1:2002.
7. Monolitiniai elementai armuojami S500 stiprumo klasės armatūros tinklais ir/ar strypynais, pagal LST EN ISO 15630-1:2010.
8. Darbai vykdomi pagal darbo projektą.

| Eil. Nr.                          | Posicija | Pavadinimas                   | Žymuo | Mato vnt. | Kiekis | Šanaudos Vien. | Iš viso | Svoris vnt., t | Papildomi duomenys |
|-----------------------------------|----------|-------------------------------|-------|-----------|--------|----------------|---------|----------------|--------------------|
| 1                                 | R-2.1    | Rygelis L500x400x4660         |       |           |        |                |         |                |                    |
| 2                                 |          | Betonas C30/37 X0             |       | m³        | 10     | 0.746          | 7.460   |                |                    |
| 3                                 |          | Armatura S500                 |       | kg        | 10     | 89.52          | 895.2   |                |                    |
| 4                                 |          | Įdėtinių detalių plienas S355 |       | kg        | 10     | 50             | 500.00  |                |                    |
| 5                                 | R-2.2    | Rygelis T700x400x4660         |       |           |        |                |         |                |                    |
| 6                                 |          | Betonas C30/37 X0             |       | m³        | 8      | 0.932          | 7.456   |                |                    |
| 7                                 |          | Armatura S500                 |       | kg        | 8      | 111.84         | 894.72  |                |                    |
| 8                                 |          | Įdėtinių detalių plienas S355 |       | kg        | 8      | 50             | 400.00  |                |                    |
| 9                                 | R-2.3    | Rygelis T700x400x4660         |       |           |        |                |         |                |                    |
| 10                                |          | Betonas C30/37 X0             |       | m³        | 2      | 0.932          | 1.864   |                |                    |
| 11                                |          | Armatura S500                 |       | kg        | 2      | 111.84         | 223.68  |                |                    |
| 12                                |          | Įdėtinių detalių plienas S355 |       | kg        | 2      | 50             | 100.00  |                |                    |
| 13                                | R-2.4    | Rygelis 300x400x4660          |       |           |        |                |         |                |                    |
| 14                                |          | Betonas C30/37 X0             |       | m³        | 4      | 0.559          | 2.236   |                |                    |
| 15                                |          | Armatura S500                 |       | kg        | 4      | 67.08          | 268.32  |                |                    |
| 16                                |          | Įdėtinių detalių plienas S355 |       | kg        | 4      | 40             | 160.00  |                |                    |
| 17                                | R-2.5    | Rygelis 300x400x4660          |       |           |        |                |         |                |                    |
| 18                                |          | Betonas C30/37 X0             |       | m³        | 2      | 0.559          | 1.118   |                |                    |
| 19                                |          | Armatura S500                 |       | kg        | 2      | 67.08          | 134.16  |                |                    |
| 20                                |          | Įdėtinių detalių plienas S355 |       | kg        | 2      | 50             | 100.00  |                |                    |
| Viso betono, m³:                  |          |                               |       |           |        |                | 20.134  |                |                    |
| Viso armatūros, kg:               |          |                               |       |           |        |                | 2416.1  |                |                    |
| Viso įdėtinių detalių plieno, kg: |          |                               |       |           |        |                | 1260.0  |                |                    |

|                            |                                                                                                                                |                                                                                                                                                                               |                                                                                                                       |                                                  |            |
|----------------------------|--------------------------------------------------------------------------------------------------------------------------------|-------------------------------------------------------------------------------------------------------------------------------------------------------------------------------|-----------------------------------------------------------------------------------------------------------------------|--------------------------------------------------|------------|
| KVAL.<br>PATV.<br>DOK. NR. |                                           | <b>UAB "Konstrukcijų pasaulis"</b><br>Jonavos g. 260, Kaunas<br>Im. k.: 304690224<br>Tel.: +370 (613) 980989<br>El.p.: k.pazereckas@gmail.com<br>www.konstrukciju-pasaulis.lt | STATINIO PROJEKTO PAVADINIMAS<br>Negyvenamasis 2 aukštų surenkamo gelžbetonio konstrukcijų mokslo paskirties pastatas |                                                  |            |
| 37603                      | PDV                                                                                                                            | Kęstutis Pažereckas                                                                                                                                                           | 2018 08                                                                                                               | DOKUMENTO PAVADINIMAS<br>Denginio rygelių planas | LAIDA      |
| 37603                      | Konstr.                                                                                                                        | Kęstutis Pažereckas                                                                                                                                                           | 2018 08                                                                                                               |                                                  | O          |
|                            |                                                                                                                                |                                                                                                                                                                               |                                                                                                                       |                                                  |            |
| LT                         | UŽSAKOVAS<br>Miškų institutas, Lietuvos agrarinių ir miškų mokslų centro filialas, Liepų g. 1, Girionių k., LT-53101, Kauno r. |                                                                                                                                                                               |                                                                                                                       | BRĖŽINIO ŽYMUO<br>KPRS18/02-TP-SK-1.12           | LAPAS<br>1 |
|                            |                                                                                                                                |                                                                                                                                                                               |                                                                                                                       |                                                  | LAPŲ<br>1  |

The architectural floor plan shows a rectangular building layout with a grid system. The columns are numbered 1 through 6, and the rows are lettered A through D. Each column contains a series of vertical rectangular units, each labeled 'PP.20.120.460-4.0'. The plan includes detailed dimensions for columns, rows, and individual units. The total width is 25300 and the total height is 15300. The plan also shows structural details like walls, doors, and windows.

**Column Dimensions:**

- Column 1: 150 (left), 300 (top/bottom), 50 (right)
- Column 2: 5000 (width), 7x1200=8400 (width)
- Column 3: 5000 (width), 3x1200=3600 (width)
- Column 4: 5000 (width), 2x1200=2400 (width)
- Column 5: 5000 (width), 7x1200=8400 (width)
- Column 6: 150 (right), 300 (top/bottom), 50 (left)

**Row Dimensions:**

- Row A: 150 (left), 300 (top), 50 (right)
- Row B: 5000 (height), 4600 (height), 300 (top/bottom), 50 (right)
- Row C: 5000 (height), 4600 (height), 300 (top/bottom), 50 (right)
- Row D: 5000 (height), 4600 (height), 300 (top/bottom), 50 (right)

**Unit Dimensions:**

- Unit width: 1200
- Unit height: 460
- Unit label: PP.20.120.460-4.0

**Structural Details:**

- Walls: 300 (thickness)
- Doors: 150 (width)
- Windows: 50 (width)

4.0 - skaičiuojamoji apkrova ant plokštės,  
be plokštės savojo svorio, kN/m<sup>2</sup>

1. Surenkamos g/b plokštės ir monolitinės perdangos ant rygių atremiamos ne mažiau kaip 150 mm.
2. Visos perdangos plokštės inkaruojamos tarpusavyje, monolitiniuose ruožuose ir rygiuose.
3. Tarpai tarp plokščių užtaisomi C30/37 klasės betonu.
4. Monolitinėms perdangoms naudojamas C30/37 stiprumo klasės betonas, pagal LST EN 206-1:2002. Perdangos armuojamos S500 stiprumo klasės armatūros tinklais ir strypais, pagal LST EN ISO 15630-1:2003.
5. Surenkamos perdangos plokštės atitinka UAB "Betonika" gaminių sortimentą (gali būti pakeistos analogiški parametru plokštėmis).
6. Perdangos atsparumas ugniai REI 45 min.

| Eil. Nr. | Pozicija | Pavadinimas                 | Žymuo | Mato vnt. | Kiekis | Sąnaudos                   |         | Svoris vnt., t | Papildomi duomenys |
|----------|----------|-----------------------------|-------|-----------|--------|----------------------------|---------|----------------|--------------------|
|          |          |                             |       |           |        | Vien.                      | Iš viso |                |                    |
| 1        |          | <b>PP.20.120.460-7.0</b>    |       | vnt.      | 57     |                            |         | 1.750          | 99.8 t (viso)      |
| 2        |          | Betonas C30/37 X0           |       | m³        | 57     | 0.700                      | 39.900  |                |                    |
| 3        |          | Armatūra A800               |       | kg        | 57     | 35.00                      | 1995.0  |                |                    |
| 4        |          | <b>PP.20.60.460-7.0</b>     |       | vnt.      | 9      |                            |         | 0.875          | 7.9 t (viso)       |
| 5        |          | Betonas C30/37 X0           |       | m³        | 9      | 0.350                      | 3.150   |                |                    |
| 6        |          | Armatūra A800               |       | kg        | 9      | 17.50                      | 157.5   |                |                    |
| 7        |          | <b>Plokščių monolitinis</b> |       |           |        |                            |         |                |                    |
| 8        |          | Betonas C30/37 X0           |       | m³        | -      | -                          | 4.700   |                |                    |
| 9        |          | Armatūra S500               |       | kg        | -      | -                          | 470.0   |                |                    |
|          |          |                             |       |           |        | <b>Viso betono, m³:</b>    |         | <b>47.750</b>  |                    |
|          |          |                             |       |           |        | <b>Viso armatūros, kg:</b> |         | <b>2622.5</b>  |                    |

|                            |                                                                                                                                   |                                                                                                                                                                             |         |                                                                                                                          |  |  |       |      |
|----------------------------|-----------------------------------------------------------------------------------------------------------------------------------|-----------------------------------------------------------------------------------------------------------------------------------------------------------------------------|---------|--------------------------------------------------------------------------------------------------------------------------|--|--|-------|------|
| KVAL.<br>PATV.<br>DOK. NR. |                                              | <b>UAB "Konstrukcijų pasaulis"</b><br>Jonavos g. 260, Kaunas<br>Įm. k.: 304690224<br>Tel. +370 (613) 98089<br>El.p.: k.pazereckas@gmail.com<br>www.konstrukciju-pasaulis.lt |         | STATINIO PROJEKTO PAVADINIMAS<br>Negyvenamasis 2 aukštų surenkamo gelžbetonio konstrukcijų<br>mokslo paskirties pastatas |  |  |       |      |
| 37603                      | PDV                                                                                                                               | Kęstutis Pažereckas                                                                                                                                                         | 2018 08 | DOKUMENTO PAVADINIMAS<br>Deginio plokštės planas                                                                         |  |  | LAIDA |      |
| 37603                      | Konstr.                                                                                                                           | Kęstutis Pažereckas                                                                                                                                                         | 2018 08 |                                                                                                                          |  |  | O     |      |
| LT                         | UŽSAKOVAS<br>Miškų institutas, Lietuvos agrarinių ir miškų mokslų<br>centro filialas, Liepų g. 1, Girionių k., LT-53101, Kauno r. |                                                                                                                                                                             |         | BRĖŽINIO ŽYMUO<br>KPRS18/02-TP-SK-1.13                                                                                   |  |  | LAPAS | LAPŲ |
|                            |                                                                                                                                   |                                                                                                                                                                             |         |                                                                                                                          |  |  | 1     | 1    |

PJŪVIS A-A MASTELIS 1:50

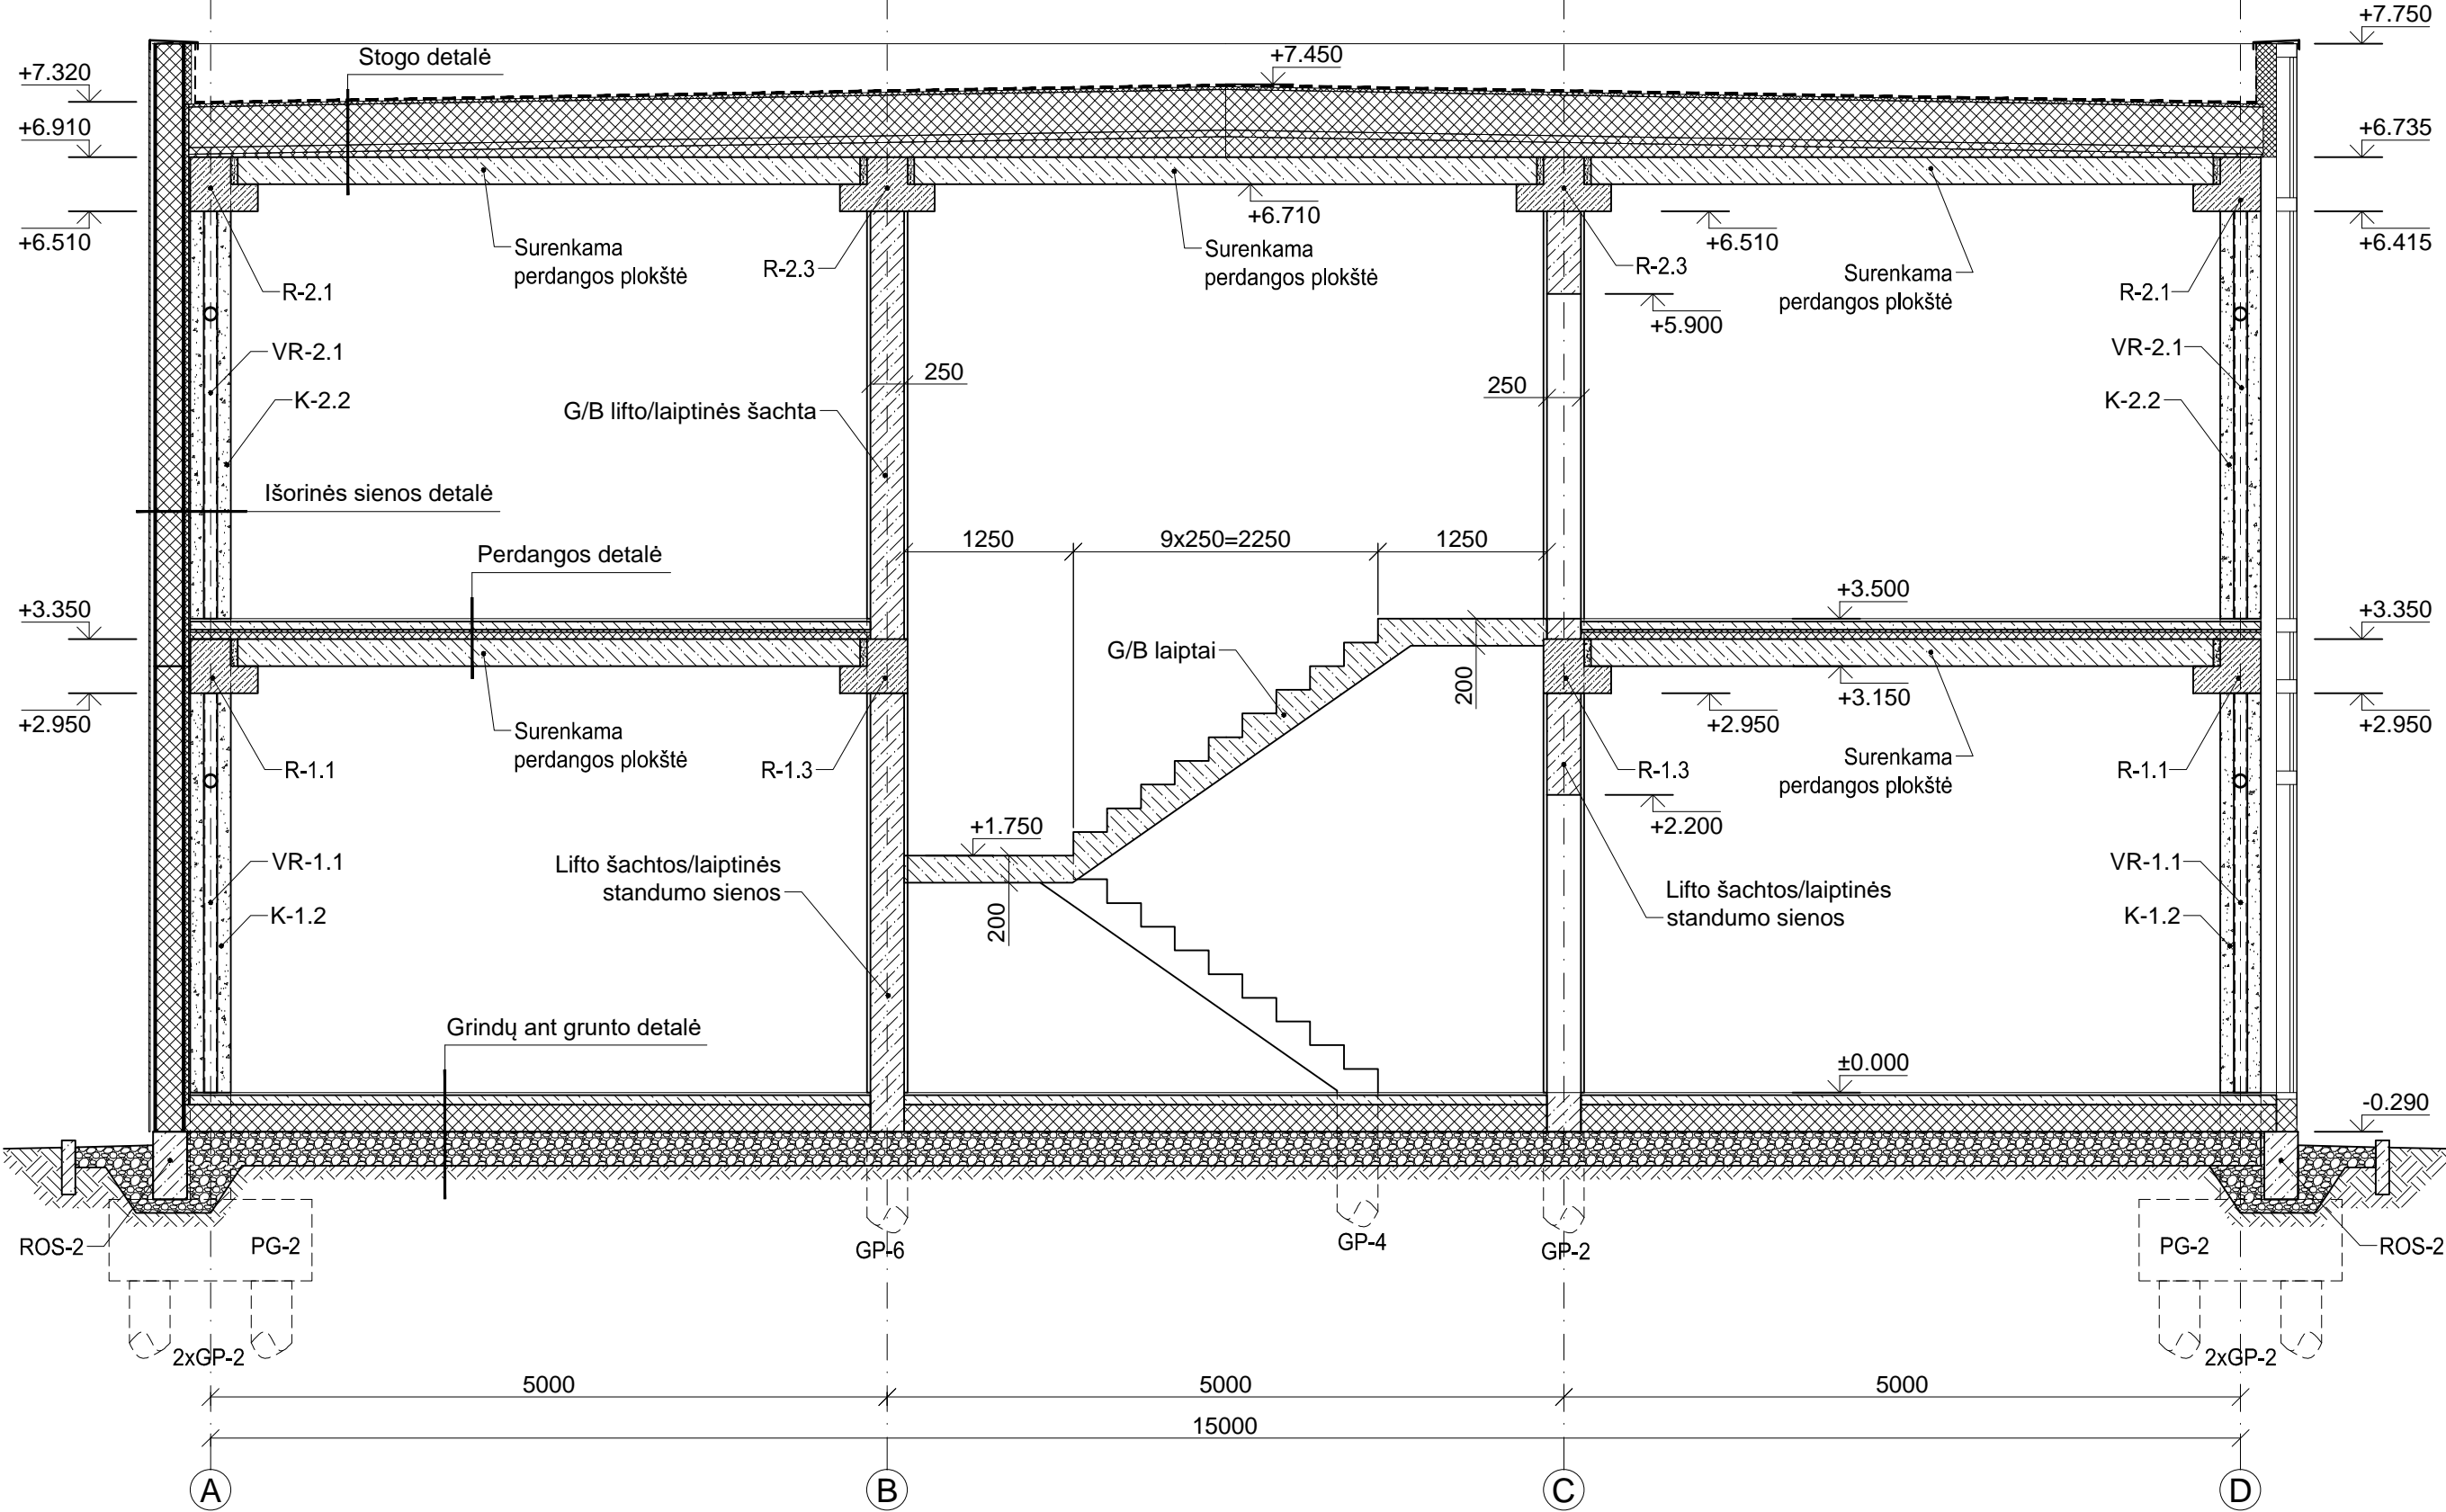

|                            |                                                                                                                      |                                                                                                                                       |         |                                                                                         |         |                                     |       |       |
|----------------------------|----------------------------------------------------------------------------------------------------------------------|---------------------------------------------------------------------------------------------------------------------------------------|---------|-----------------------------------------------------------------------------------------|---------|-------------------------------------|-------|-------|
| KVAL.<br>PATV.<br>DOK. NR. |                                 | UAB "Konstrukcijų pasaulis"                                                                                                           |         | STATINIO PROJEKTO PAVADINIMAS                                                           |         |                                     |       |       |
|                            |                                                                                                                      | Jonavos g. 260, Kaunas<br>Įm. k.: 304690224<br>Tel. +370 (613) 98089<br>El.p.: k.pazereckas@gmail.com<br>www.konstrukciju-pasaulis.lt |         | Negyvenamasis 2 aukštų surenkamo gelžbetonio konstrukcijų<br>mokslo paskirties pastatas |         |                                     |       |       |
|                            |                                                                                                                      | 37603                                                                                                                                 | PDV     | Kęstutis Pažereckas                                                                     | 2018 08 | DOKUMENTO PAVADINIMAS<br>Pjūvis A-A |       | LAIDA |
|                            |                                                                                                                      | 37603                                                                                                                                 | Konstr. | Kęstutis Pažereckas                                                                     | 2018 08 |                                     |       | O     |
|                            |                                                                                                                      |                                                                                                                                       |         |                                                                                         |         |                                     |       |       |
| LT                         | UŽSAKOVAS                                                                                                            |                                                                                                                                       |         | BRĖŽINIO ŽYMUO<br><br>KPRS18/02-TP-SK-1.14                                              |         |                                     | LAPAS | LAPŲ  |
|                            | Miškų institutas, Lietuvos agrarinių ir miškų mokslų<br>centro filialas, Liepų g. 1, Girionių k., LT-53101, Kauno r. |                                                                                                                                       |         |                                                                                         |         |                                     | 1     | 1     |



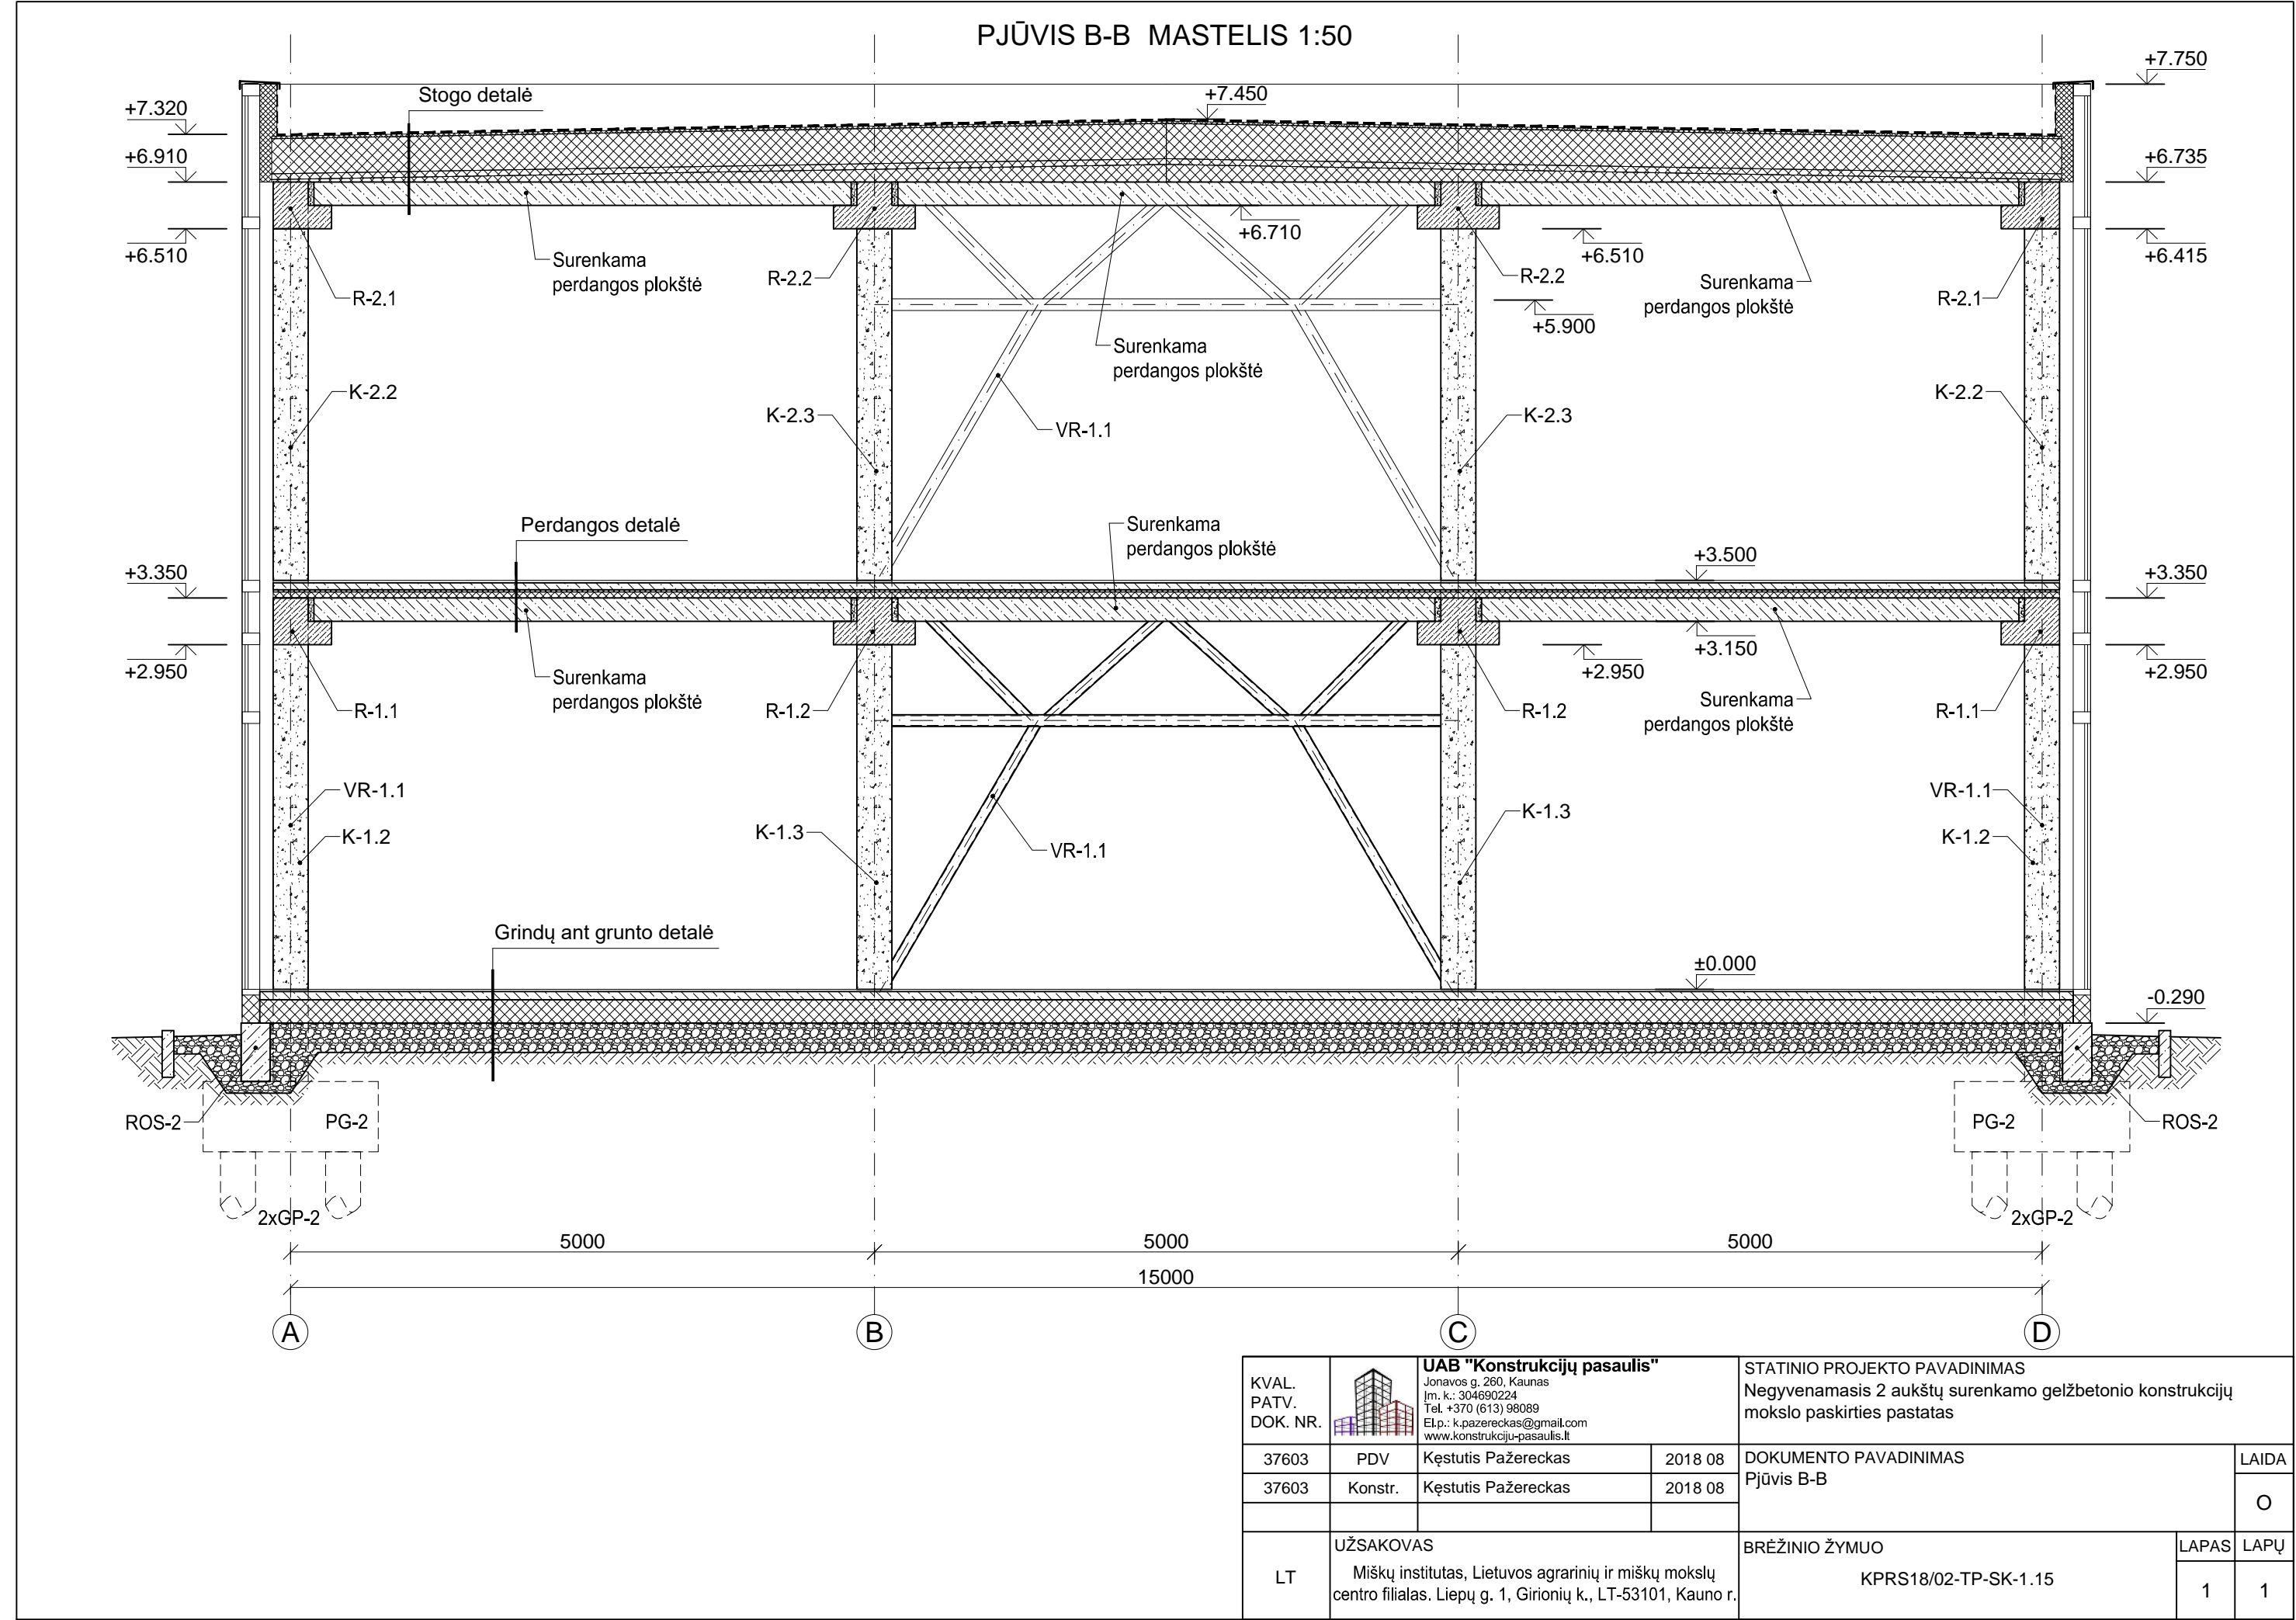

|                            |                                                                                                                   |                                                                                                                                       |         |                                                                                      |  |  |       |      |
|----------------------------|-------------------------------------------------------------------------------------------------------------------|---------------------------------------------------------------------------------------------------------------------------------------|---------|--------------------------------------------------------------------------------------|--|--|-------|------|
| KVAL.<br>PATV.<br>DOK. NR. |                              | UAB "Konstrukcijų pasaulis"                                                                                                           |         | STATINIO PROJEKTO PAVADINIMAS                                                        |  |  |       |      |
|                            |                                                                                                                   | Jonavos g. 260, Kaunas<br>Įm. k.: 304690224<br>Tel. +370 (613) 98089<br>El.p.: k.pazereckas@gmail.com<br>www.konstrukciju-pasaulis.lt |         | Negyvenamasis 2 aukštų surenkamo gelžbetonio konstrukcijų mokslo paskirties pastatas |  |  |       |      |
|                            |                                                                                                                   |                                                                                                                                       |         |                                                                                      |  |  |       |      |
|                            |                                                                                                                   |                                                                                                                                       |         |                                                                                      |  |  |       |      |
| 37603                      | PDV                                                                                                               | Kęstutis Pažereckas                                                                                                                   | 2018 08 | DOKUMENTO PAVADINIMAS<br>Pjūvis B-B                                                  |  |  | LAIDA |      |
| 37603                      | Konstr.                                                                                                           | Kęstutis Pažereckas                                                                                                                   | 2018 08 |                                                                                      |  |  | O     |      |
|                            |                                                                                                                   |                                                                                                                                       |         |                                                                                      |  |  |       |      |
| LT                         | UŽSAKOVAS                                                                                                         |                                                                                                                                       |         | BRĖŽINIO ŽYMUO<br><br>KPRS18/02-TP-SK-1.15                                           |  |  | LAPAS | LAPŲ |
|                            | Miškų institutas, Lietuvos agrarinių ir miškų mokslų centro filialas, Liepų g. 1, Girionių k., LT-53101, Kauno r. |                                                                                                                                       |         |                                                                                      |  |  | 1     | 1    |

|                                                         |
|---------------------------------------------------------|
| Bituminė / EPDM stogo danga                             |
| Nuolydį formuojantis akm. vatos sluoksnis - 20...150 mm |
| Akmens vatos šiltinamasis sluoksnis - 300 mm            |
| Garo izoliacinė plėvelė - 1 sl.                         |
| Akmens vatos šiltinamasis sluoksnis - 50 mm             |
| Surenkamos g/b perdangos plokštės - 200 mm              |
| Inžinerinės sistemos                                    |
| Pakabinamos lubos (pagal poreikį)                       |

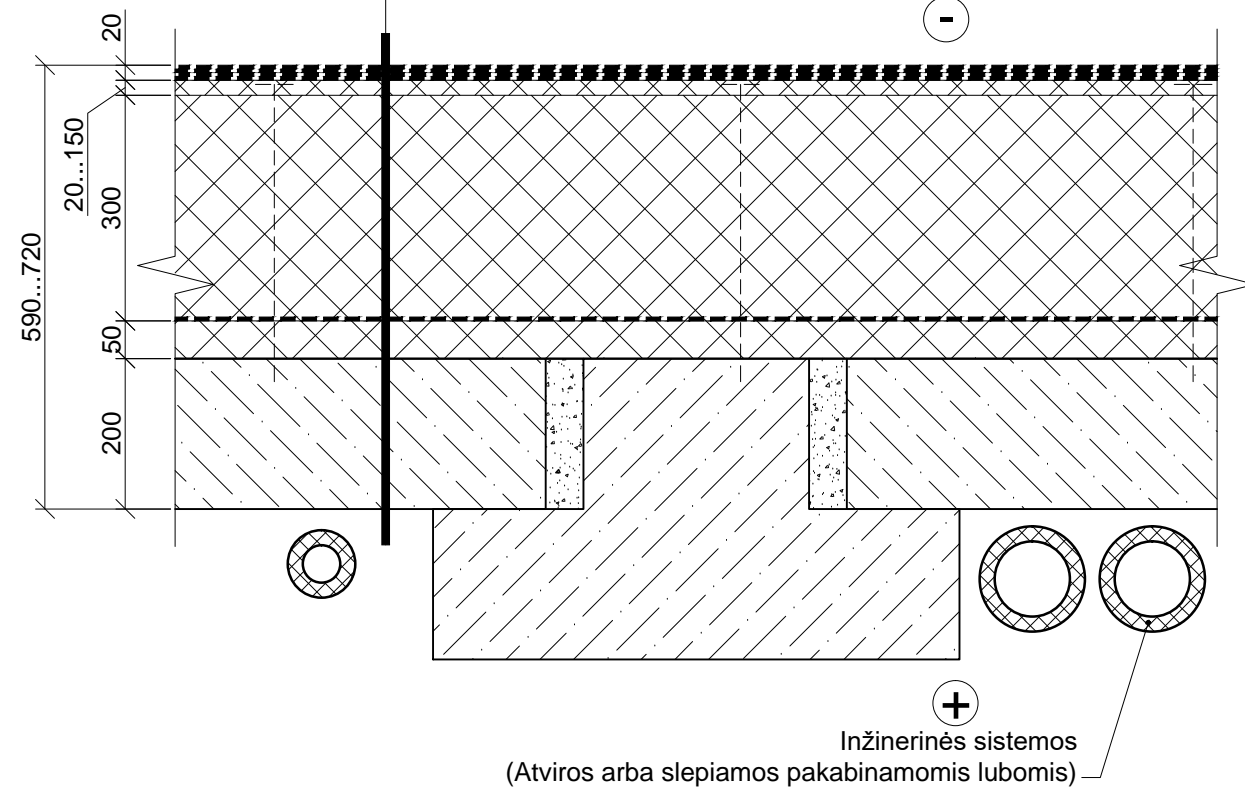

## GRINDŲ ANT GRUNTO DETALĖ MASTELIS 1:10

|                                                     |
|-----------------------------------------------------|
| Grindų danga - 20 mm                                |
| 2 sl. tepinės hidroizoliacijos (drėgnoms patalpoms) |
| Armutos išlyginamasis sluoksnis - 70 mm             |
| Polietileno plėvelė - 200 μm                        |
| Polistireninis putplastis EPS 100 - 200 mm          |
| Hidroizoliacija - 1 sl.                             |
| Sutankintas skaldos sluoksnis (fr.0/32) - 250 mm    |
| Sutankintas vietinis gruntas                        |

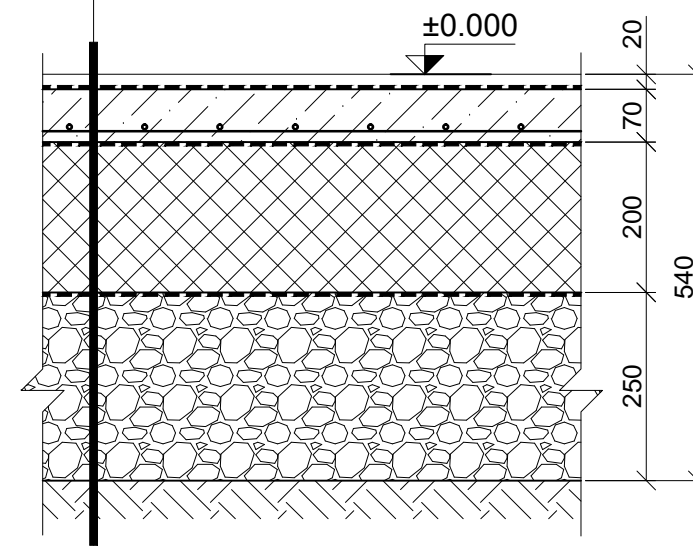

## VERTIKALIEJI RYŠIAI VR-1 MASTELIS 1:40

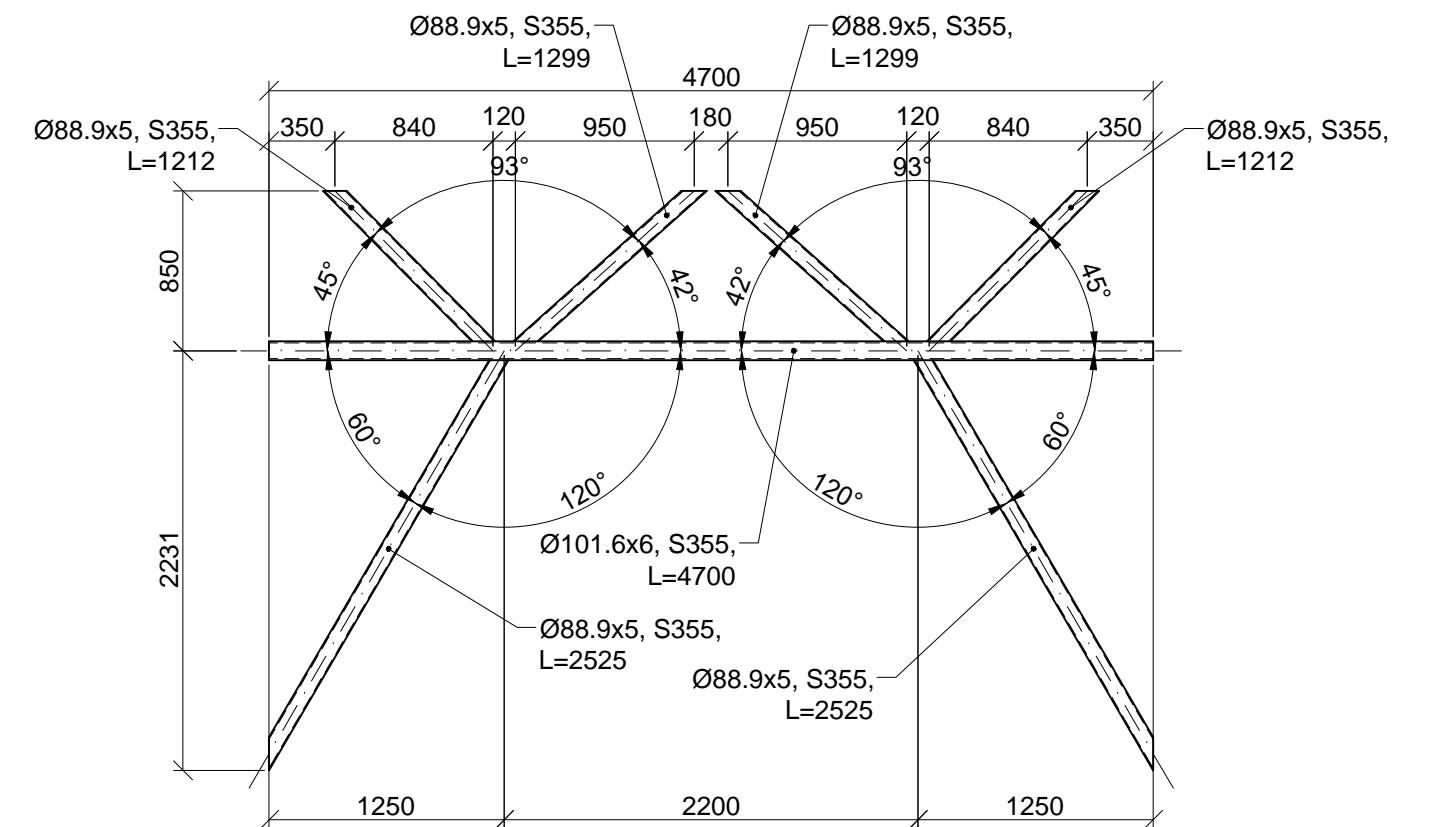

PERDANGOS DETALĖ MASTELIS 1:10

|                                                                          |
|--------------------------------------------------------------------------|
| Grindų danga - 20mm                                                      |
| Teptinė hidroizoliacija (drėgnose patalpose) - 1 sl.                     |
| Armutos išlyginamasis sl., betonas C25/30, Ø4 S500 akutė 150x150 - 60 mm |
| Polietileno plėvelė 0.2 mm - 1 sl.                                       |
| Smūgio izoliacija PAROC SSB-1 - 20 mm                                    |
| Polistireninis putplasčio EPS 100 - 50 mm                                |
| Surenkamos g/b perdangos plokštės - 200 mm                               |

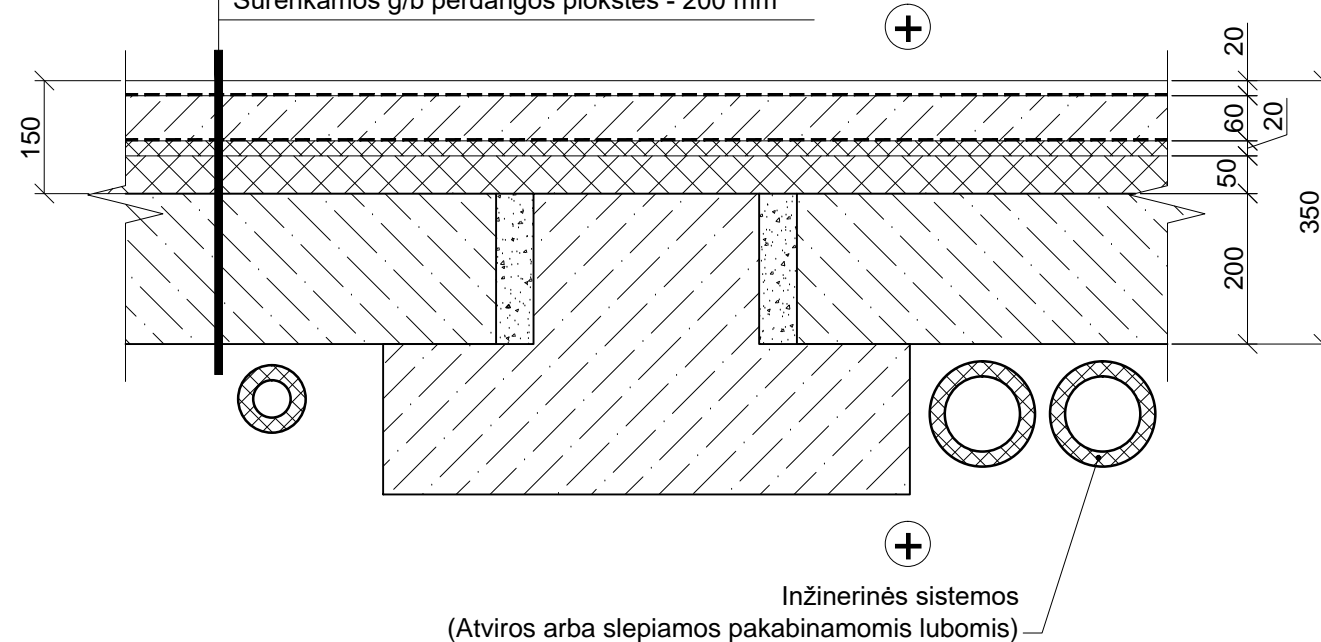

IŠORINĒS SIENOS SKYDO  
DETALĒ MASTELIS 1:10

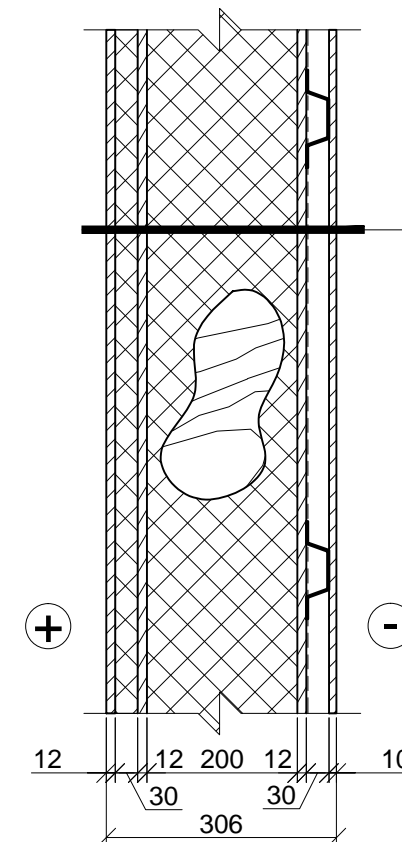

|                                                                                                 |
|-------------------------------------------------------------------------------------------------|
| Vidaus apdaila (gipso/kartono plokštė) - 12,5 mm                                                |
| Kingspan Therma TP10 ( $\lambda_d=0.023$ W/m·K) - 30 mm                                         |
| OSB 3 plokštė - 12 mm                                                                           |
| Putų poliuretanas ( $\lambda_d=0.022$ W/m·K)<br>tarp 50x200, C24 karkaso tašų, kas 600 - 200 mm |
| OSB 3 plokštė - 12 mm                                                                           |
| Difuzinė plėvelė - 1 sl.                                                                        |
| "Omega" skardiniai grebėstai fasado apdailai tvirtinti - 30 mm                                  |
| Fasado apdaila cementinės plokštės - 10 mm                                                      |

|                            |                                                                                                                      |                                                                                                                                                                               |         |                                                                                                                          |  |       |      |
|----------------------------|----------------------------------------------------------------------------------------------------------------------|-------------------------------------------------------------------------------------------------------------------------------------------------------------------------------|---------|--------------------------------------------------------------------------------------------------------------------------|--|-------|------|
| KVAL.<br>PATV.<br>DOK. NR. |                                 | <b>UAB "Konstrukcijų pasaulis"</b><br>Jonavos g. 26D, Kšainas<br>Įm. k.: 304690224<br>Tel. +370 (613) 98089<br>El. p.: k.pazereckas@gmail.com<br>www.konstrukciju-pasaulis.lt |         | STATINIO PROJEKTO PAVADINIMAS<br>Negyvenamasis 2 aukštų surenkamo gelžbetonio konstrukcijų<br>mokslo paskirties pastatas |  |       |      |
| 37603                      | PDV                                                                                                                  | Kęstutis Pažereckas                                                                                                                                                           | 2018 08 | DOKUMENTO PAVADINIMAS                                                                                                    |  | LAIDA |      |
| 37603                      | Konstr.                                                                                                              | Kęstutis Pažereckas                                                                                                                                                           | 2018 08 | Aitvarų detalės;<br>Vertikalieji ryšiai VR-1                                                                             |  | O     |      |
| LT                         | UŽSAKOVAS                                                                                                            |                                                                                                                                                                               |         | BRĖŽINIO ŽYMUO                                                                                                           |  | LAPAS | LAPŲ |
|                            | Miškų institutas, Lietuvos agrarinių ir miškų mokslų<br>centro filialas. Liepų g. 1, Girionių k., LT-53101, Kauno r. |                                                                                                                                                                               |         | KPRS18/02-TP-SK-1.16                                                                                                     |  | 1     | 1    |



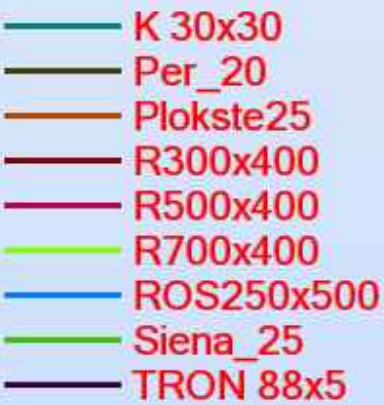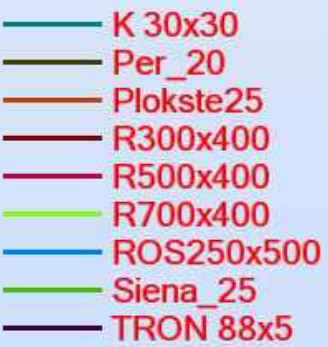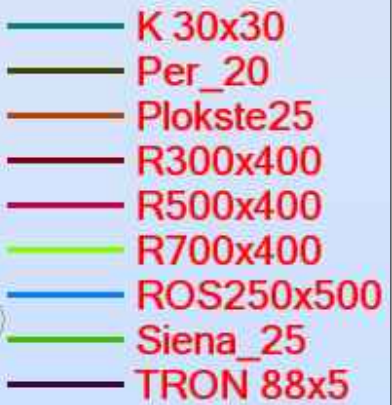

|                            |                                                                                                                                |                                                                                                                                                                          |         |                                                                                                                       |            |
|----------------------------|--------------------------------------------------------------------------------------------------------------------------------|--------------------------------------------------------------------------------------------------------------------------------------------------------------------------|---------|-----------------------------------------------------------------------------------------------------------------------|------------|
| KVAL.<br>PATV.<br>DOK. NR. |                                           | <b>UAB "Konstrukcijų pasaulis"</b><br>Jonas g. 260, Kaunas<br>Im. k. 304890224<br>Tel. +370 (613) 98089<br>El.p.: k.pazereckas@gmail.com<br>www.konstrukciju-pasaulis.lt |         | STATINIO PROJEKTO PAVADINIMAS<br>Negyvenamasis 2 aukštų surenkamo gelžbetonio konstrukcijų mokslo paskirties pastatas |            |
| 37603                      | PDV                                                                                                                            | Kęstutis Pažereckas                                                                                                                                                      | 2018 08 | DOKUMENTO PAVADINIMAS<br>Konstrukcinio modelio vizualizacijos                                                         | LAIDA      |
| 37603                      | Konstr.                                                                                                                        | Kęstutis Pažereckas                                                                                                                                                      | 2018 08 |                                                                                                                       | O          |
|                            |                                                                                                                                |                                                                                                                                                                          |         |                                                                                                                       |            |
| LT                         | UŽSAKOVAS<br>Miškų institutas, Lietuvos agrarinių ir miškų mokslų centro filialas. Liepų g. 1, Girionių k., LT-53101, Kauno r. |                                                                                                                                                                          |         | BRĖŽINIO ŽYMUO<br>KPRS18/02-TP-SK-1-17                                                                                | LAPAS<br>1 |
|                            |                                                                                                                                |                                                                                                                                                                          |         |                                                                                                                       | LAPŲ<br>1  |
