# Supplementary material for: Sustainability Impacts of Wood- and Concrete-Based Frame Buildings
Source: MDPI journal article supplement (doi:10.3390/su15021560), 2023-01-13
Supplement: s1 [file s1]

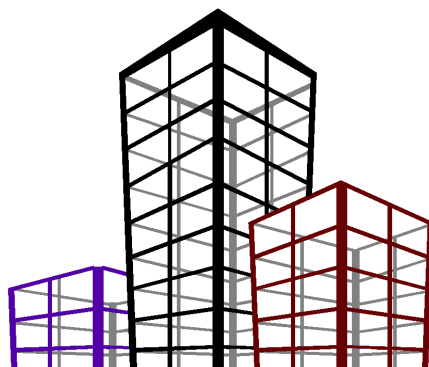

**UAB „KONSTRUKCIJŲ PASAULIS“**

Jonavos g. 260, Kaunas, LT-44131  
 Įm. k.: 304690224. Tel.: +370 (613) 98089;  
 el. p.: k.pazereckas@gmail.com  
 www.konstrukciju-pasaulis.lt

|                               |                                                                                                                   |                     |       |
|-------------------------------|-------------------------------------------------------------------------------------------------------------------|---------------------|-------|
| <b>Projekto pavadinimas</b>   | <b>Negyvenamasis 5 aukštų surenkamo gelžbetonio konstrukcijų mokslo paskirties pastatas</b>                       |                     |       |
| Užsakovas                     | Miškų institutas, Lietuvos agrarinių ir miškų mokslų centro filialas. Liepų g. 1, Girionių k., LT-53101, Kauno r. |                     |       |
| Statybos rūšis                | Nauja statyba                                                                                                     |                     |       |
| Naudojimo paskirtis           | Negyvenamoji (mokslo paskirties)                                                                                  |                     |       |
| Kategorija                    | Ypatingas                                                                                                         |                     |       |
| Projekto etapas               | Techninis projektas (TP)                                                                                          |                     |       |
| <b>Projekto dalis / žymuo</b> | <b>Konstrukcijų dalis KPRS18/02-TP-SK</b>                                                                         |                     |       |
| UAB Konstrukcijų pasaulis     | Direktorius                                                                                                       | Kęstutis Pažereckas |       |
|                               | Projekto dalies vadovas                                                                                           | Kęstutis Pažereckas | 37603 |
|                               | Projektuotojas                                                                                                    | Kęstutis Pažereckas | 37603 |

Kaunas 2018 m.

**2. DOKUMENTŲ ŽINIARAŠTIS****2.1. Projekto dalies bylos (segtuvo) dokumentų sudėties žiniaraštis**

| Dokumento žymuo      | Lapų sk. | Laida | Dokumento pavadinimas                                    | Pastabos |
|----------------------|----------|-------|----------------------------------------------------------|----------|
| KPRS18/02-TP-SK-DŽ   | 1        | 0     | Dokumentų sudėties žiniaraštis                           |          |
| KPRS18/02-TP-SK-3.1  | 1        | 0     | Polių skaičiuotinių apkrovų planas                       |          |
| KPRS18/02-TP-SK-3.2  | 1        | 0     | Polių charakteristinių apkrovų planas                    |          |
| KPRS18/02-TP-SK-3.3  | 1        | 0     | Polių pamatų planas                                      |          |
| KPRS18/02-TP-SK-3.4  | 1        | 0     | Polių galvenų ir rostverkų planas                        |          |
| KPRS18/02-TP-SK-3.5  | 1        | 0     | Polių galvenos                                           |          |
| KPRS18/02-TP-SK-3.6  | 1        | 0     | Rostverkai                                               |          |
| KPRS18/02-TP-SK-3.7  | 1        | 0     | Pirmo aukšto planas                                      |          |
| KPRS18/02-TP-SK-3.8  | 1        | 0     | Kolonų ir pamato principinis jungimo mazgas              |          |
| KPRS18/02-TP-SK-3.9  | 1        | 0     | Pirmo/antro/trečio/ketvirto aukštų perdangų rygių planas |          |
| KPRS18/02-TP-SK-3.10 | 1        | 0     | Pirmo/antro/trečio/ketvirto aukštų perdangų planas       |          |
| KPRS18/02-TP-SK-3.11 | 1        | 0     | Antro/trečio/ketvirto/penkto aukštų planas               |          |
| KPRS18/02-TP-SK-3.12 | 1        | 0     | Deginio rygių planas                                     |          |
| KPRS18/02-TP-SK-3.13 | 1        | 0     | Deginio plokštės planas                                  |          |
| KPRS18/02-TP-SK-3.14 | 1        | 0     | Pjūvis A-A                                               |          |
| KPRS18/02-TP-SK-3.15 | 1        | 0     | Pjūvis B-B                                               |          |
| KPRS18/02-TP-SK-3.16 | 1        | 0     | Atitvarų detalės;<br>Vertikalieji ryšiai VR-1            |          |
| KPRS18/02-TP-SK-3.17 | 1        | 0     | Konstrukcinio modelio vizualizacijos                     |          |

|                               |                                                                                                                                |                                                                                                                                                                       |         |                                                                                                                       |  |       |
|-------------------------------|--------------------------------------------------------------------------------------------------------------------------------|-----------------------------------------------------------------------------------------------------------------------------------------------------------------------|---------|-----------------------------------------------------------------------------------------------------------------------|--|-------|
| KVAL.<br>PATV.<br>DOK.<br>NR. | 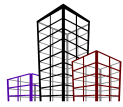                                            | UAB „Konstrukcijų pasaulis“<br>Jonavos g. 260, Kaunas.<br>Įm. k.: 304690224.<br>Tel. +370 (613) 98089<br>el.p. k.pazereckas@gmail.com<br>www.konstrukciju-pasaulis.lt |         | STATINIO PROJEKTO PAVADINIMAS<br>Negyvenamasis 5 aukštų surenkamo gelžbetonio konstrukcijų mokslo paskirties pastatas |  |       |
| 37603                         | PDV                                                                                                                            | K. Pažereckas                                                                                                                                                         | 2018 08 | DOKUMENTO PAVADINIMAS<br>Dokumentų žiniaraštis                                                                        |  | Laida |
| 37603                         | Konstr.                                                                                                                        | K. Pažereckas                                                                                                                                                         | 2018 08 |                                                                                                                       |  | 0     |
| LT                            | UŽSAKOVAS<br>Miškų institutas, Lietuvos agrarinių ir miškų mokslų centro filialas. Liepų g. 1, Girionių k., LT-53101, Kauno r. |                                                                                                                                                                       |         | DOKUMENTO ŽYMUO<br>KPRS18/02-TP-SK-DŽ                                                                                 |  | LAPAS |
|                               |                                                                                                                                |                                                                                                                                                                       |         |                                                                                                                       |  | 1     |
|                               |                                                                                                                                |                                                                                                                                                                       |         |                                                                                                                       |  | LAPŲ  |
|                               |                                                                                                                                |                                                                                                                                                                       |         |                                                                                                                       |  | 1     |

POLIŲ SKAIČIUOTINIŲ APKROVŲ PLANAS MASTELIS 1:100

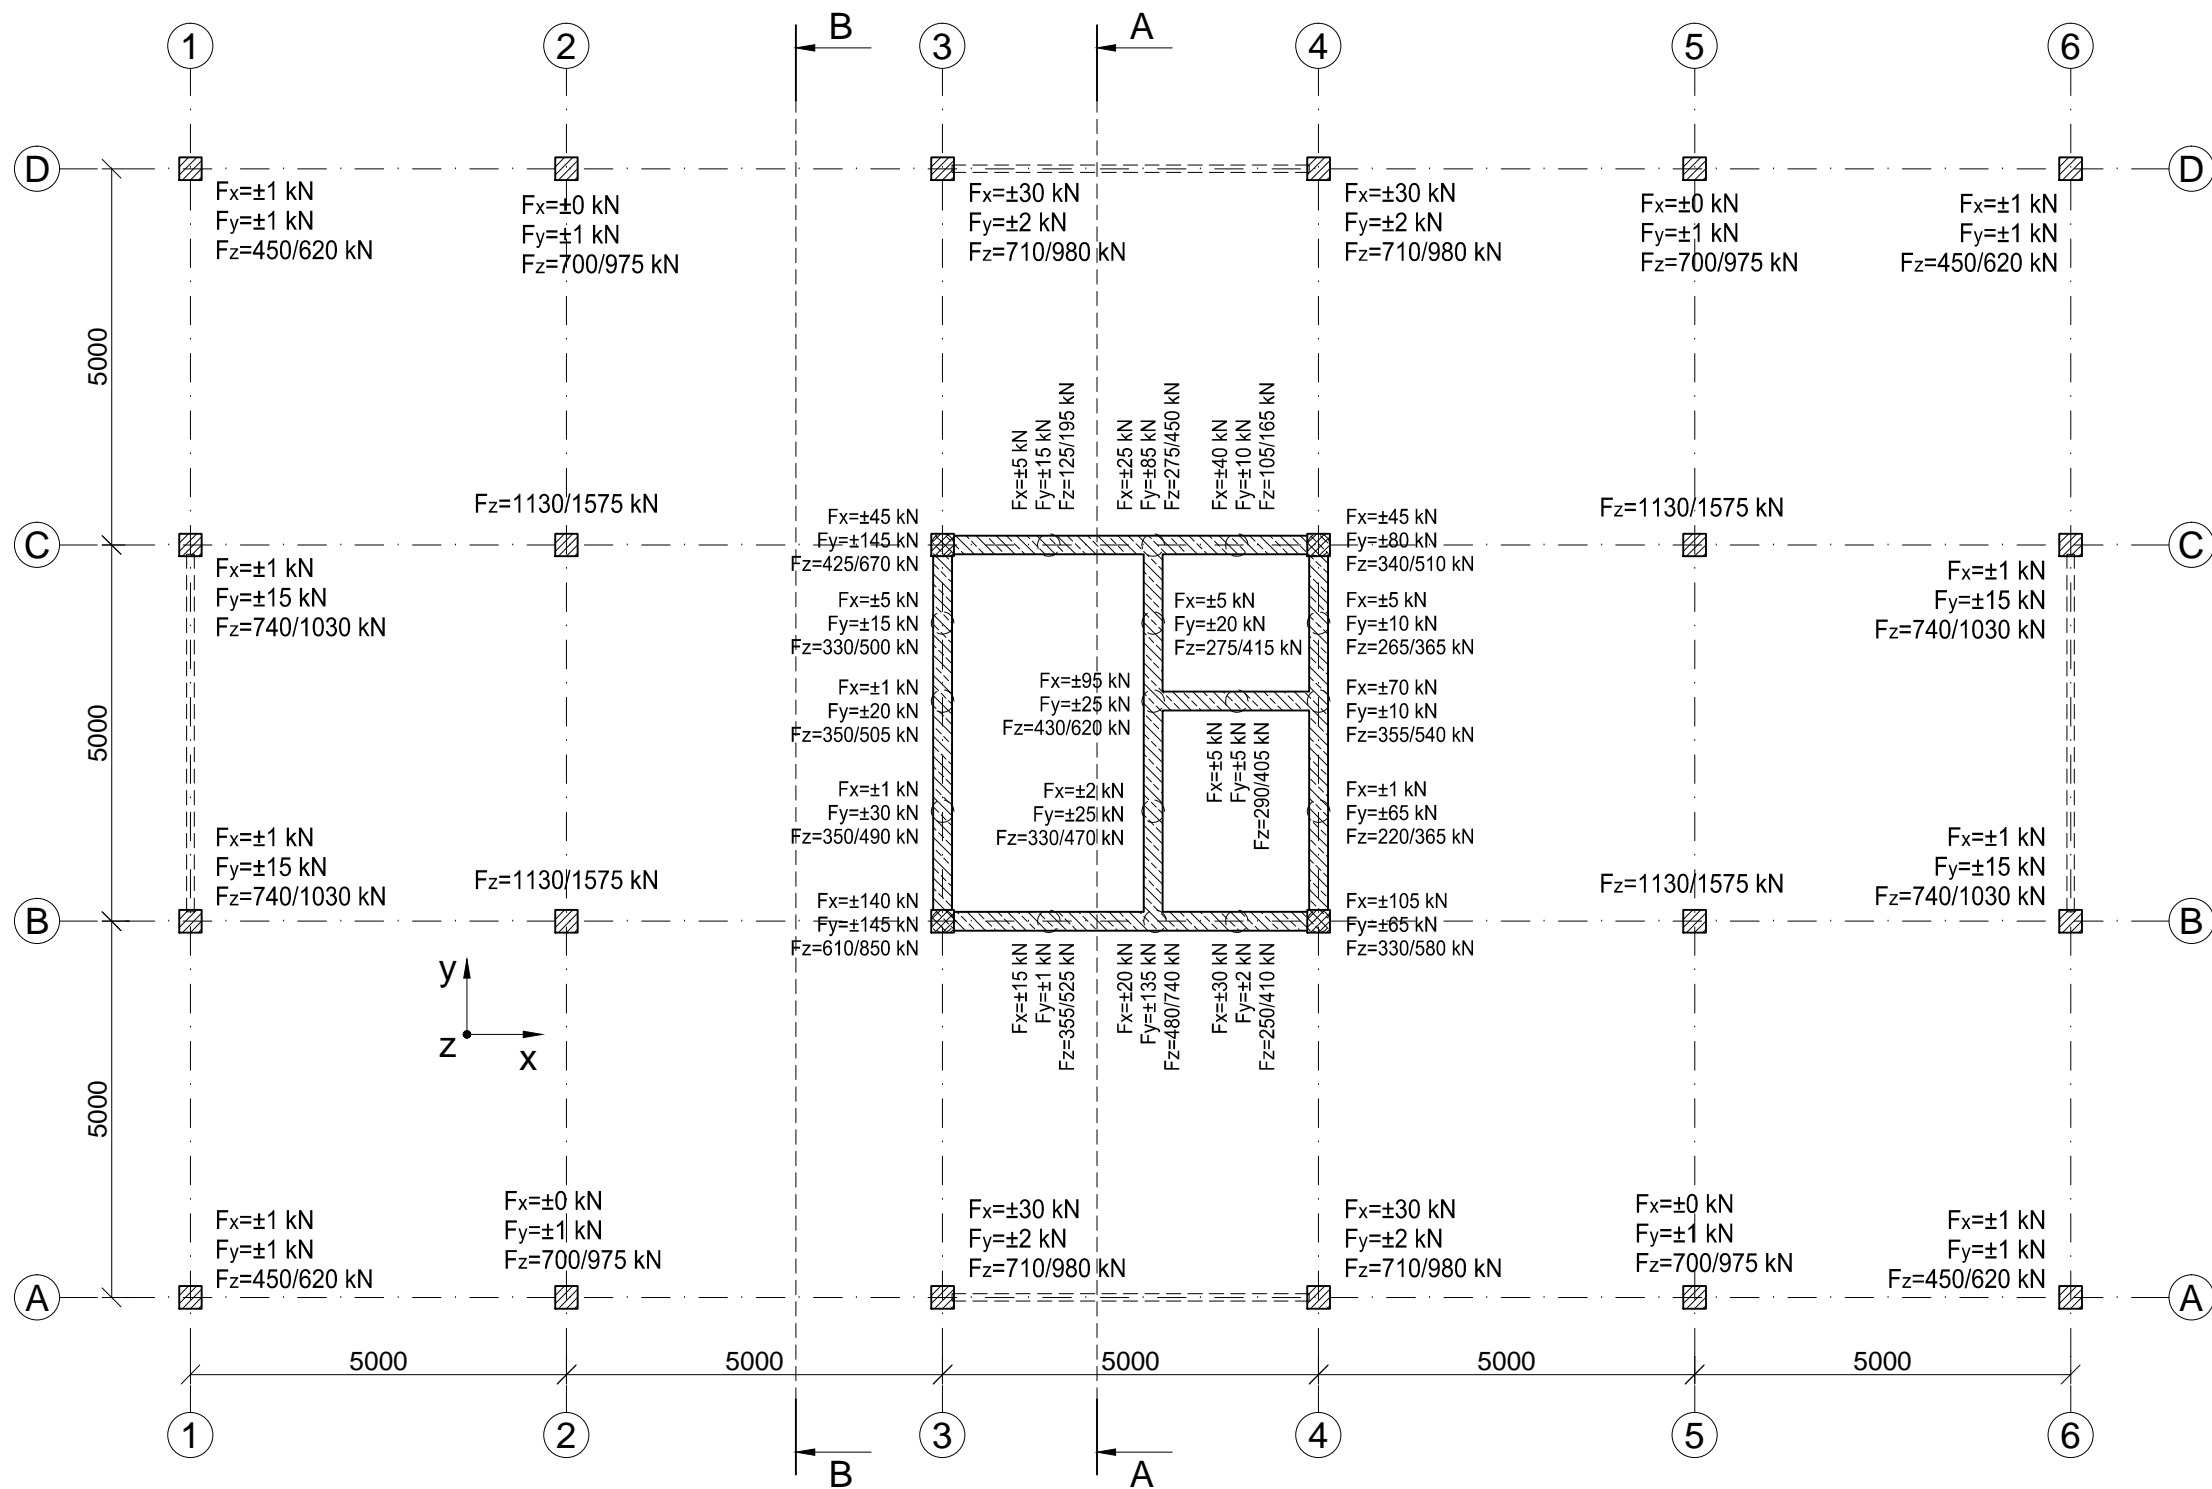

- PASTABOS:
- 1. Skaičiuojamosios pamatų apkrovos apskaičiuotos taikant  $\gamma_g=1.35$  koeficientą nuolatinėms apkrovoms,  $\gamma_q=\gamma_s=\gamma_w=1.30$  kintamoms (naudojimo, sniego ir vėjo) apkrovoms.
  - 2. Polinių pamatų ir polių galvenų svoris neįvertintas.
  - 3. Polinių pamatų skaičiuotiniai svoriai:
    - 5,5m poliaus - 13.0 kN
    - 7,0m poliaus - 16.5 kN
    - 8,0m poliaus - 19.0 kN
    - 9,0m poliaus - 21.5 kN
    - 10,0m poliaus - 24.0 kN
  - 4. Polių galvenų skaičiuotiniai svoriai:
    - PG-1 galvena - 53.0 kN
    - PG-2 galvena - 25.0 kN
    - PG-3 galvena - 95.5 kN
    - PP-1 galvena - 992.0 kN

|                            |                                                                                                                   |                                                                                                                                       |         |                                                                                      |  |       |      |
|----------------------------|-------------------------------------------------------------------------------------------------------------------|---------------------------------------------------------------------------------------------------------------------------------------|---------|--------------------------------------------------------------------------------------|--|-------|------|
| KVAL.<br>PATV.<br>DOK. NR. |                              | UAB "Konstrukcijų pasaulis"                                                                                                           |         | STATINIO PROJEKTO PAVADINIMAS                                                        |  |       |      |
|                            |                                                                                                                   | Jonavos g. 260, Kaunas<br>Įm. k.: 304690224<br>Tel. +370 (613) 98089<br>El.p.: k.pazereckas@gmail.com<br>www.konstrukciju-pasaulis.lt |         | Negyvenamasis 5 aukštų surenkamo gelžbetonio konstrukcijų mokslo paskirties pastatas |  |       |      |
|                            |                                                                                                                   |                                                                                                                                       |         |                                                                                      |  |       |      |
| 37603                      | PDV                                                                                                               | Kęstutis Pažereckas                                                                                                                   | 2018 08 | DOKUMENTO PAVADINIMAS<br>Polių skaičiuotinių apkrovų planas                          |  | LAIDA |      |
| 37603                      | Konstr.                                                                                                           | Kęstutis Pažereckas                                                                                                                   | 2018 08 |                                                                                      |  | O     |      |
|                            |                                                                                                                   |                                                                                                                                       |         |                                                                                      |  |       |      |
| LT                         | UŽSAKOVAS                                                                                                         |                                                                                                                                       |         | BRĖŽINIO ŽYMUO<br><br>KPRS18/02-TP-SK-3.1                                            |  | LAPAS | LAPŲ |
|                            | Miškų institutas, Lietuvos agrarinių ir miškų mokslų centro filialas, Liepų g. 1, Girionių k., LT-53101, Kauno r. |                                                                                                                                       |         |                                                                                      |  | 1     | 1    |

# POLIŲ CHARAKTERISTINIŲ APKROVŲ PLANAS MASTELIS 1:100

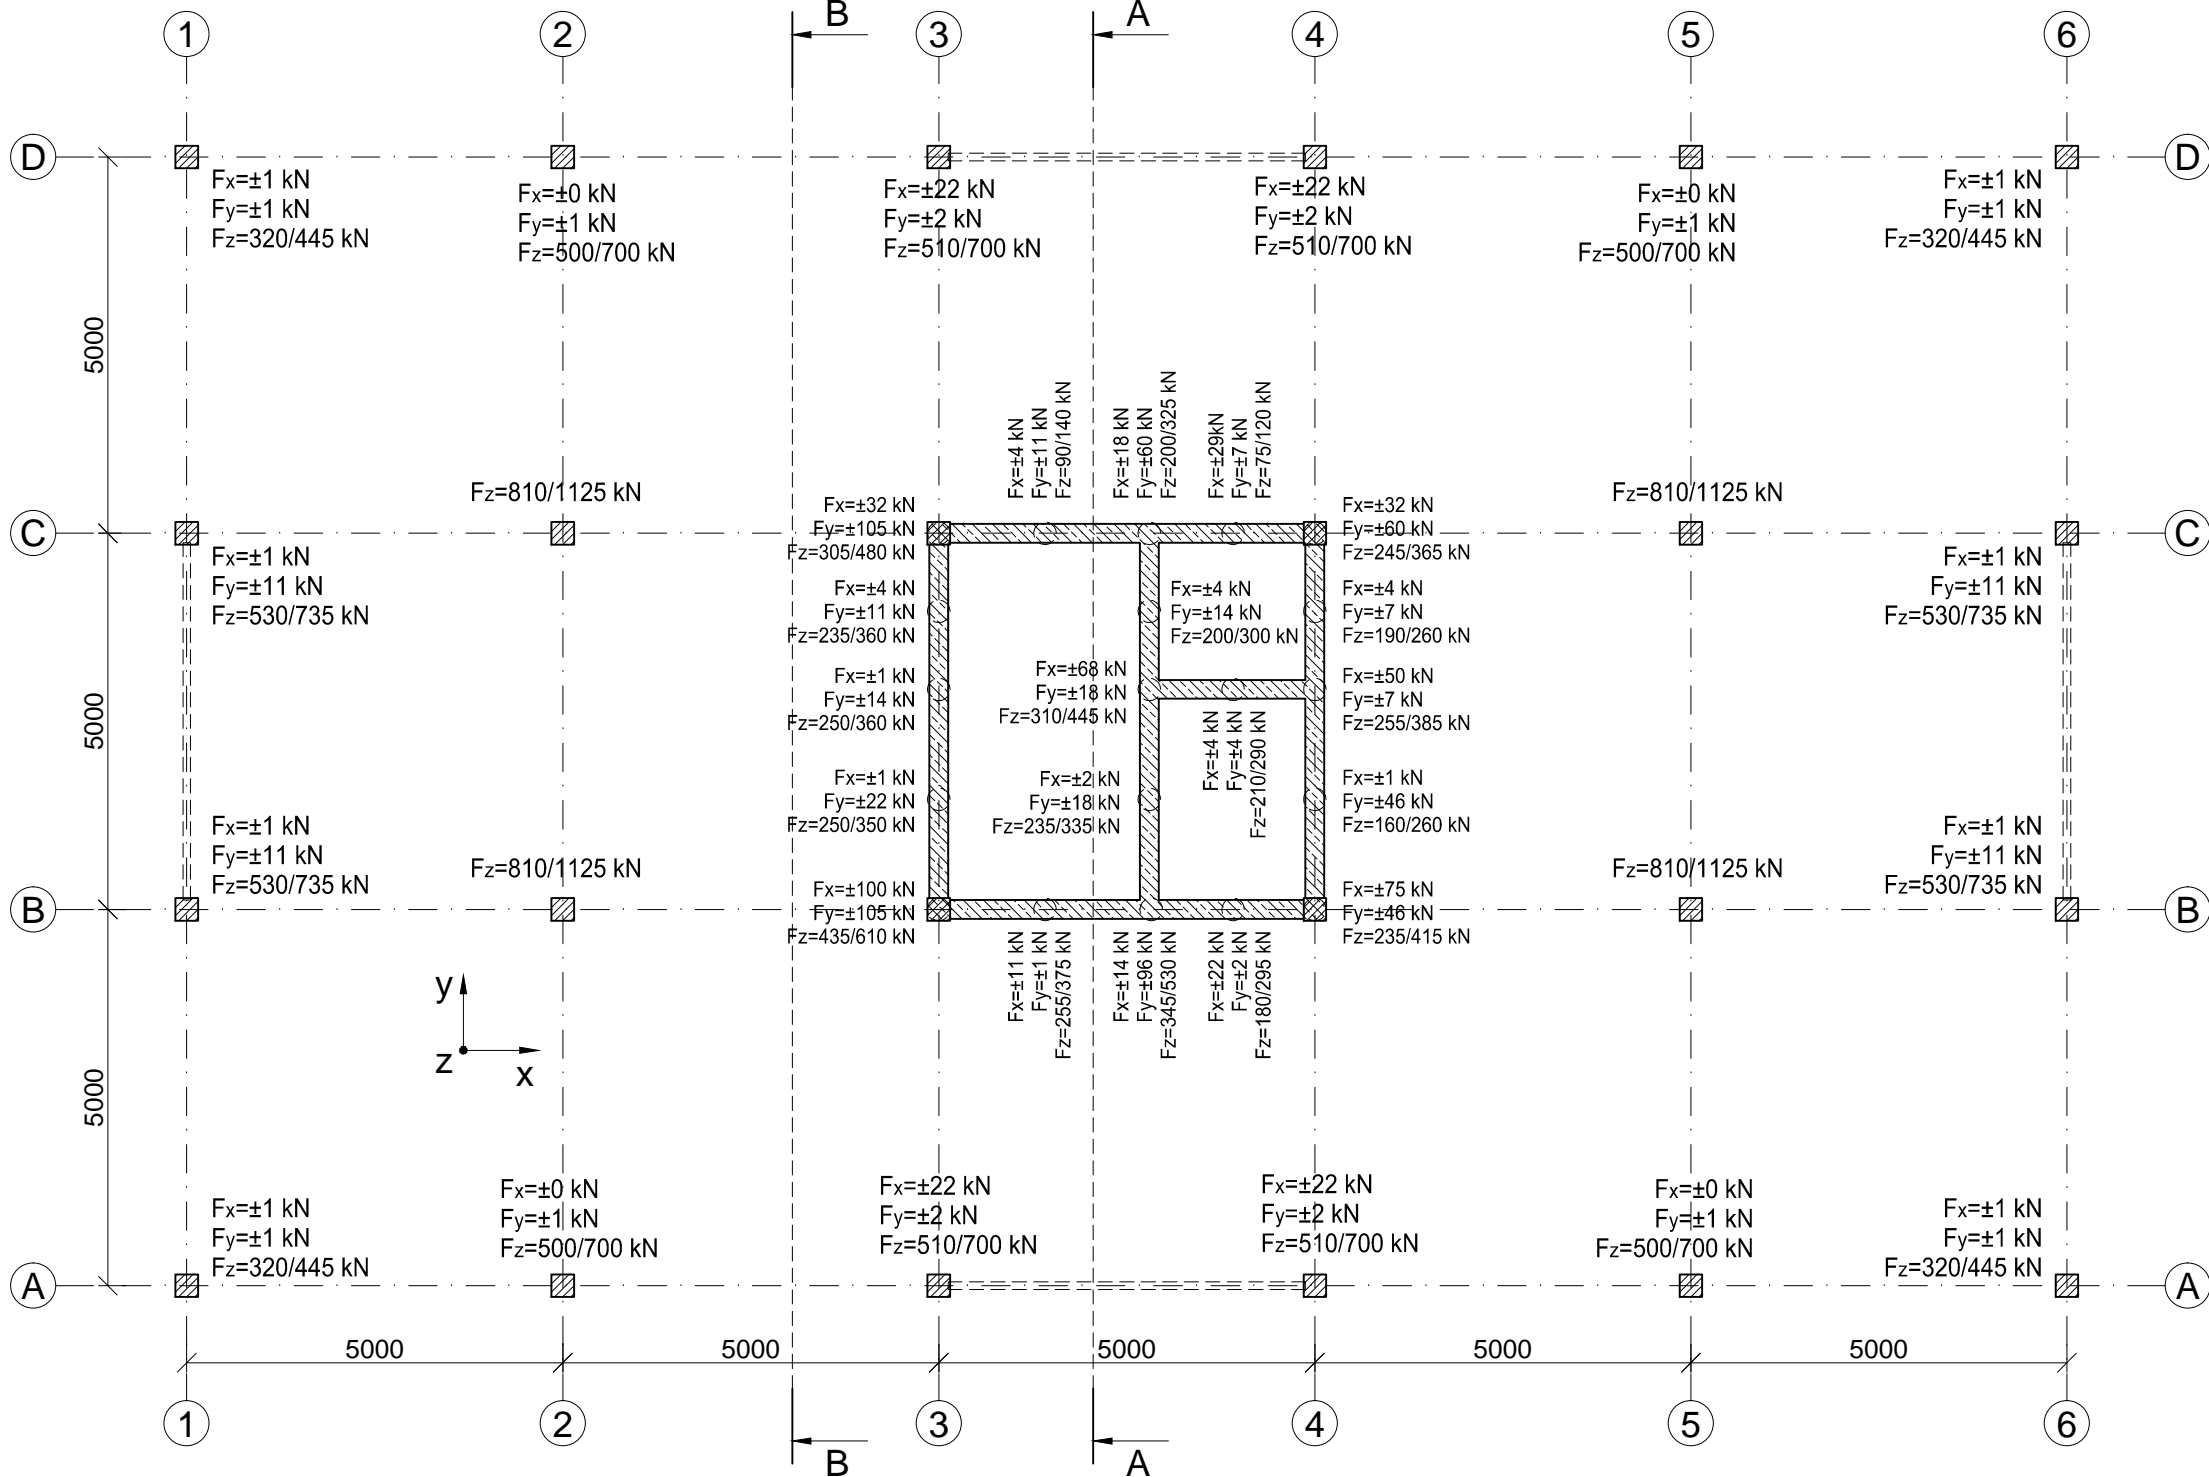

PASTABOS:

1. Charakteristinės pamatų apkrovos apskaičiuotos taikant  $\gamma_g=1.0$  koeficientą nuolatinėms apkrovoms,  $\gamma_q=\gamma_s=\gamma_w=1.00$  kintamoms (naudojimo, sniego ir vėjo) apkrovoms.

2. Polinių pamatų ir polių galvėnų svoris neįvertintas.

- ### 3. Polinių pamatų charakteristiniai svoriai:

- 5,5m poliaus - 10.0 kN  
7,0m poliaus - 12.0 kN  
8,0m poliaus - 14.0 kN  
9,0m poliaus - 16.0 kN  
10,0m poliaus - 17.5 kN

4. Polių galvenų charakteristiniai svoriai:

- PG-1 galvena - 39.5 kN  
PG-2 galvena - 18.2 kN  
PG-3 galvena - 70.5 kN  
PP-1 galvena - 735.0 kN

|                            |                                                                                                                                       |                                                                                                                                                                             |                     |                                                                                                                          |                                                                |                |
|----------------------------|---------------------------------------------------------------------------------------------------------------------------------------|-----------------------------------------------------------------------------------------------------------------------------------------------------------------------------|---------------------|--------------------------------------------------------------------------------------------------------------------------|----------------------------------------------------------------|----------------|
| KVAL.<br>PATV.<br>DOK. NR. |                                                  | <b>UAB "Konstrukcijų pasaulis"</b><br>Jonavos g. 260, Kaunas<br>Įm. k.: 304690224<br>Tel. +370 (613) 98089<br>El.p.: k.pazereckas@gmail.com<br>www.konstrukciju-pasaulis.lt |                     | STATINIO PROJEKTO PAVADINIMAS<br>Negyvenamasis 5 aukštų surenkamo gelžbetonio konstrukcijų<br>mokslo paskirties pastatas |                                                                |                |
|                            | 37603                                                                                                                                 | PDV                                                                                                                                                                         | Kęstutis Pažereckas | 2018 08                                                                                                                  | DOKUMENTO PAVADINIMAS<br>Polių charakteristinių apkrovų planas |                |
|                            | 37603                                                                                                                                 | Konstr.                                                                                                                                                                     | Kęstutis Pažereckas | 2018 08                                                                                                                  | LAIDA<br><br>O                                                 |                |
|                            |                                                                                                                                       |                                                                                                                                                                             |                     |                                                                                                                          |                                                                |                |
| LT                         | UŽSAKOVAS<br><br>Miškų institutas, Lietuvos agrarinių ir miškų mokslų<br>centro filialas, Liepų g. 1, Girionių k., LT-53101, Kauno r. |                                                                                                                                                                             |                     | BRĖŽINIO ŽYMUO<br><br>KPRS18/02-TP-SK-3.2                                                                                |                                                                | LAPAS<br><br>1 |
|                            |                                                                                                                                       |                                                                                                                                                                             |                     |                                                                                                                          |                                                                | LAPŲ<br><br>1  |

POLINIŲ PAMATŲ PLANAS MASTELIS 1:100

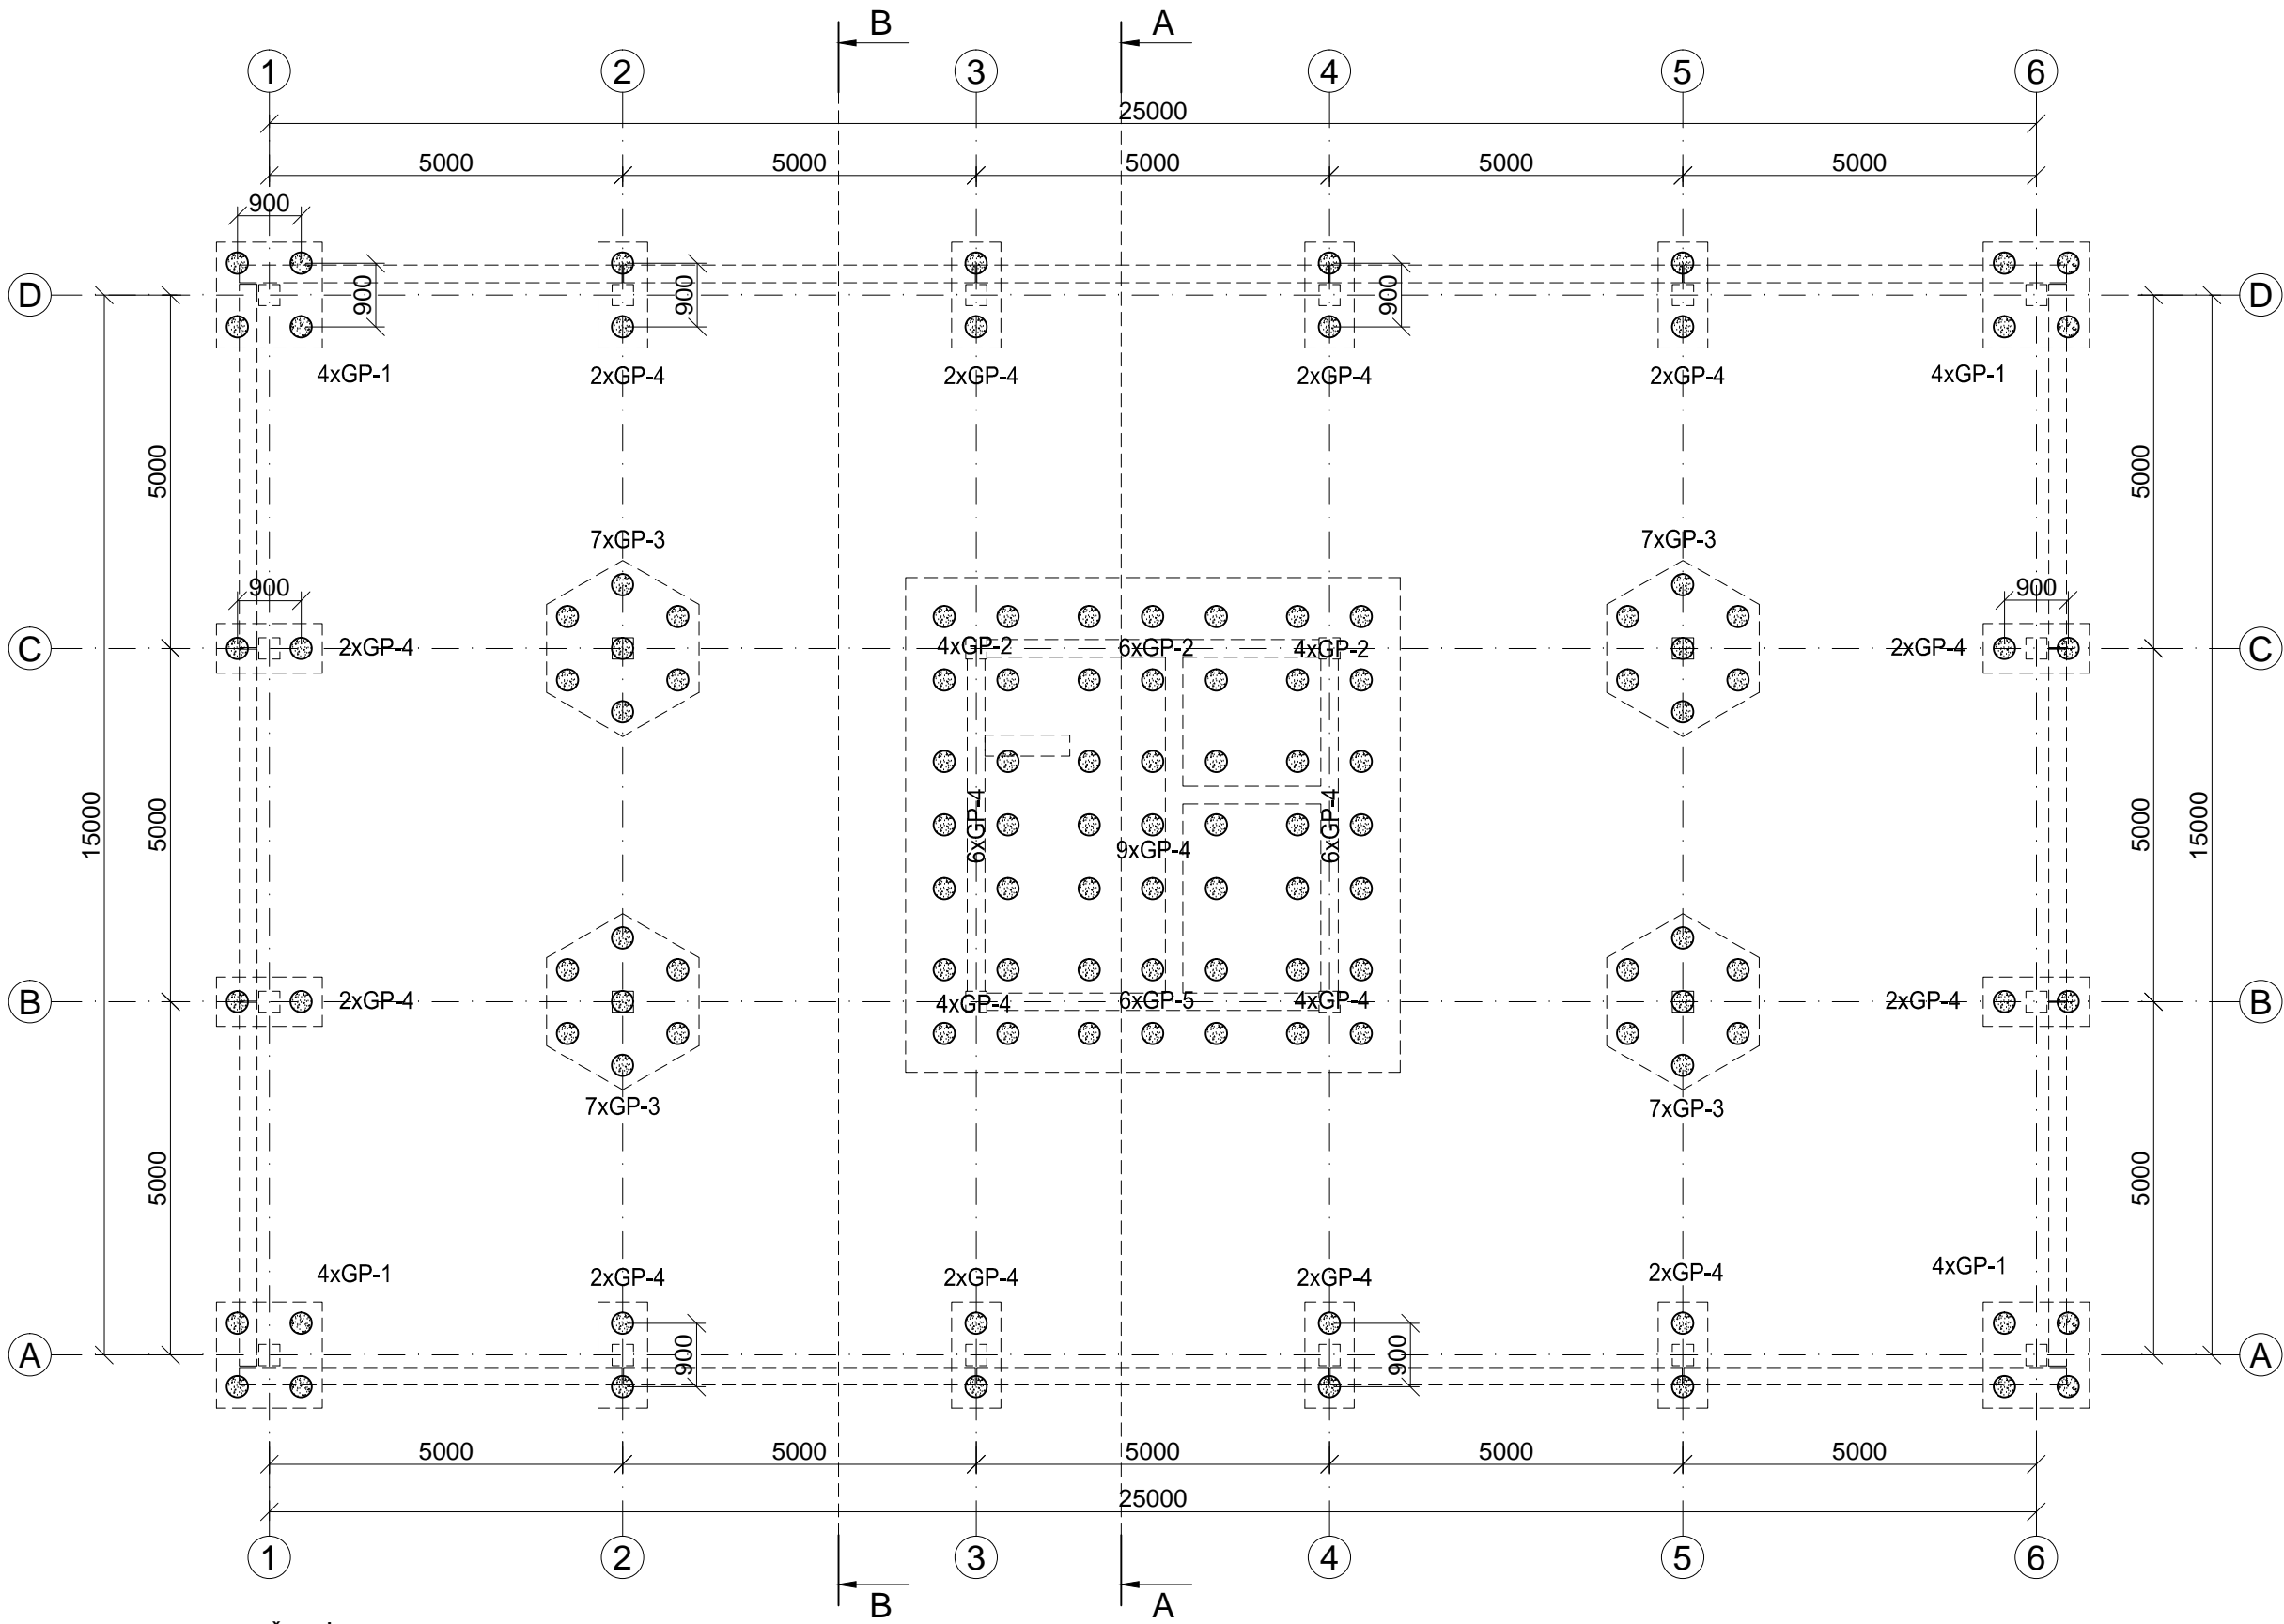

ŽYMĖJIMAS:  
GP-... - Gręžtinis polis;

PASTABOS:

1. Gręžtiniai poliniai pamatai suprojektuoti vidutinio stiprumo ir stipraus smėlingo, dulkingo moreninio molio pagrindui ( $q_c=2.1-3.1$  MPa,  $f_s= 79-60$  kPa).
2. Gręžtiniai poliai - Ø300 mm skersmens ir 5,5 - 10,0 m ilgių.
3. Pamatai gali būti įrengiami, tik vadovaujantis darbo projektu. Už pamatų įrengimo darbų kokybę atsako rangovas.
4. Prieš rengiant darbo projektą būtina atlikti vietovės inžinerinius-geologinius tyrinėjimus ir patikslinti polių tipą ir įgilinimą.
5. Pamatus gali įrengti tik kvalifikuotas rangovas.
6. Gruntas po pamatais turi būti nejudintas, vientisos struktūros.
7. Pamatai armuojami S500 stiprumo klasės armatūros strypynais, pagal LST EN ISO 15630-1:2010.
8. Pamatams naudojamas C20/25 XC2 stiprumo klasės betonas, pagal LST EN 206-1:2002.

POLINIŲ PAMATŲ ŽINIARAŠTIS

| Žymėjimas | Diametras, mm | Ilgis, mm | Kiekis, vnt. |
|-----------|---------------|-----------|--------------|
| GP-1      | Ø300          | 5500      | 16           |
| GP-2      | Ø300          | 7000      | 14           |
| GP-3      | Ø300          | 8000      | 28           |
| GP-4      | Ø300          | 9000      | 53           |
| GP-5      | Ø300          | 10000     | 6            |

|                            |                                                                                                                   |                                                                                                                                       |         |                                                                                      |   |       |
|----------------------------|-------------------------------------------------------------------------------------------------------------------|---------------------------------------------------------------------------------------------------------------------------------------|---------|--------------------------------------------------------------------------------------|---|-------|
| KVAL.<br>PATV.<br>DOK. NR. |                                                                                                                   | UAB "Konstrukcijų pasaulis"                                                                                                           |         | STATINIO PROJEKTO PAVADINIMAS                                                        |   |       |
|                            |                                                                                                                   | Jonavos g. 260, Kaunas<br>Įm. k.: 304690224<br>Tel. +370 (613) 98089<br>El.p.: k.pazereckas@gmail.com<br>www.konstrukciju-pasaulis.lt |         | Negyvenamasis 5 aukštų surenkamo gelžbetonio konstrukcijų mokslo paskirties pastatas |   |       |
| 37603                      | PDV                                                                                                               | Kęstutis Pažereckas                                                                                                                   | 2018 08 | DOKUMENTO PAVADINIMAS                                                                |   | LAIDA |
| 37603                      | Konstr.                                                                                                           | Kęstutis Pažereckas                                                                                                                   | 2018 08 | Polių pamatų planas                                                                  |   | O     |
|                            |                                                                                                                   |                                                                                                                                       |         |                                                                                      |   |       |
| LT                         | UŽSAKOVAS                                                                                                         |                                                                                                                                       |         | BRĖŽINIO ŽYMUO                                                                       |   | LAPAS |
|                            | Miškų institutas, Lietuvos agrarinių ir miškų mokslų centro filialas, Liepų g. 1, Girionių k., LT-53101, Kauno r. |                                                                                                                                       |         | KPRS18/02-TP-SK-3.3                                                                  |   | LAPŲ  |
|                            |                                                                                                                   |                                                                                                                                       |         |                                                                                      |   | 1     |
|                            |                                                                                                                   |                                                                                                                                       |         |                                                                                      | 1 | 1     |



POLIŲ GALVENŲ IR ROSTVERKŲ PLANAS MASTELIS 1:100

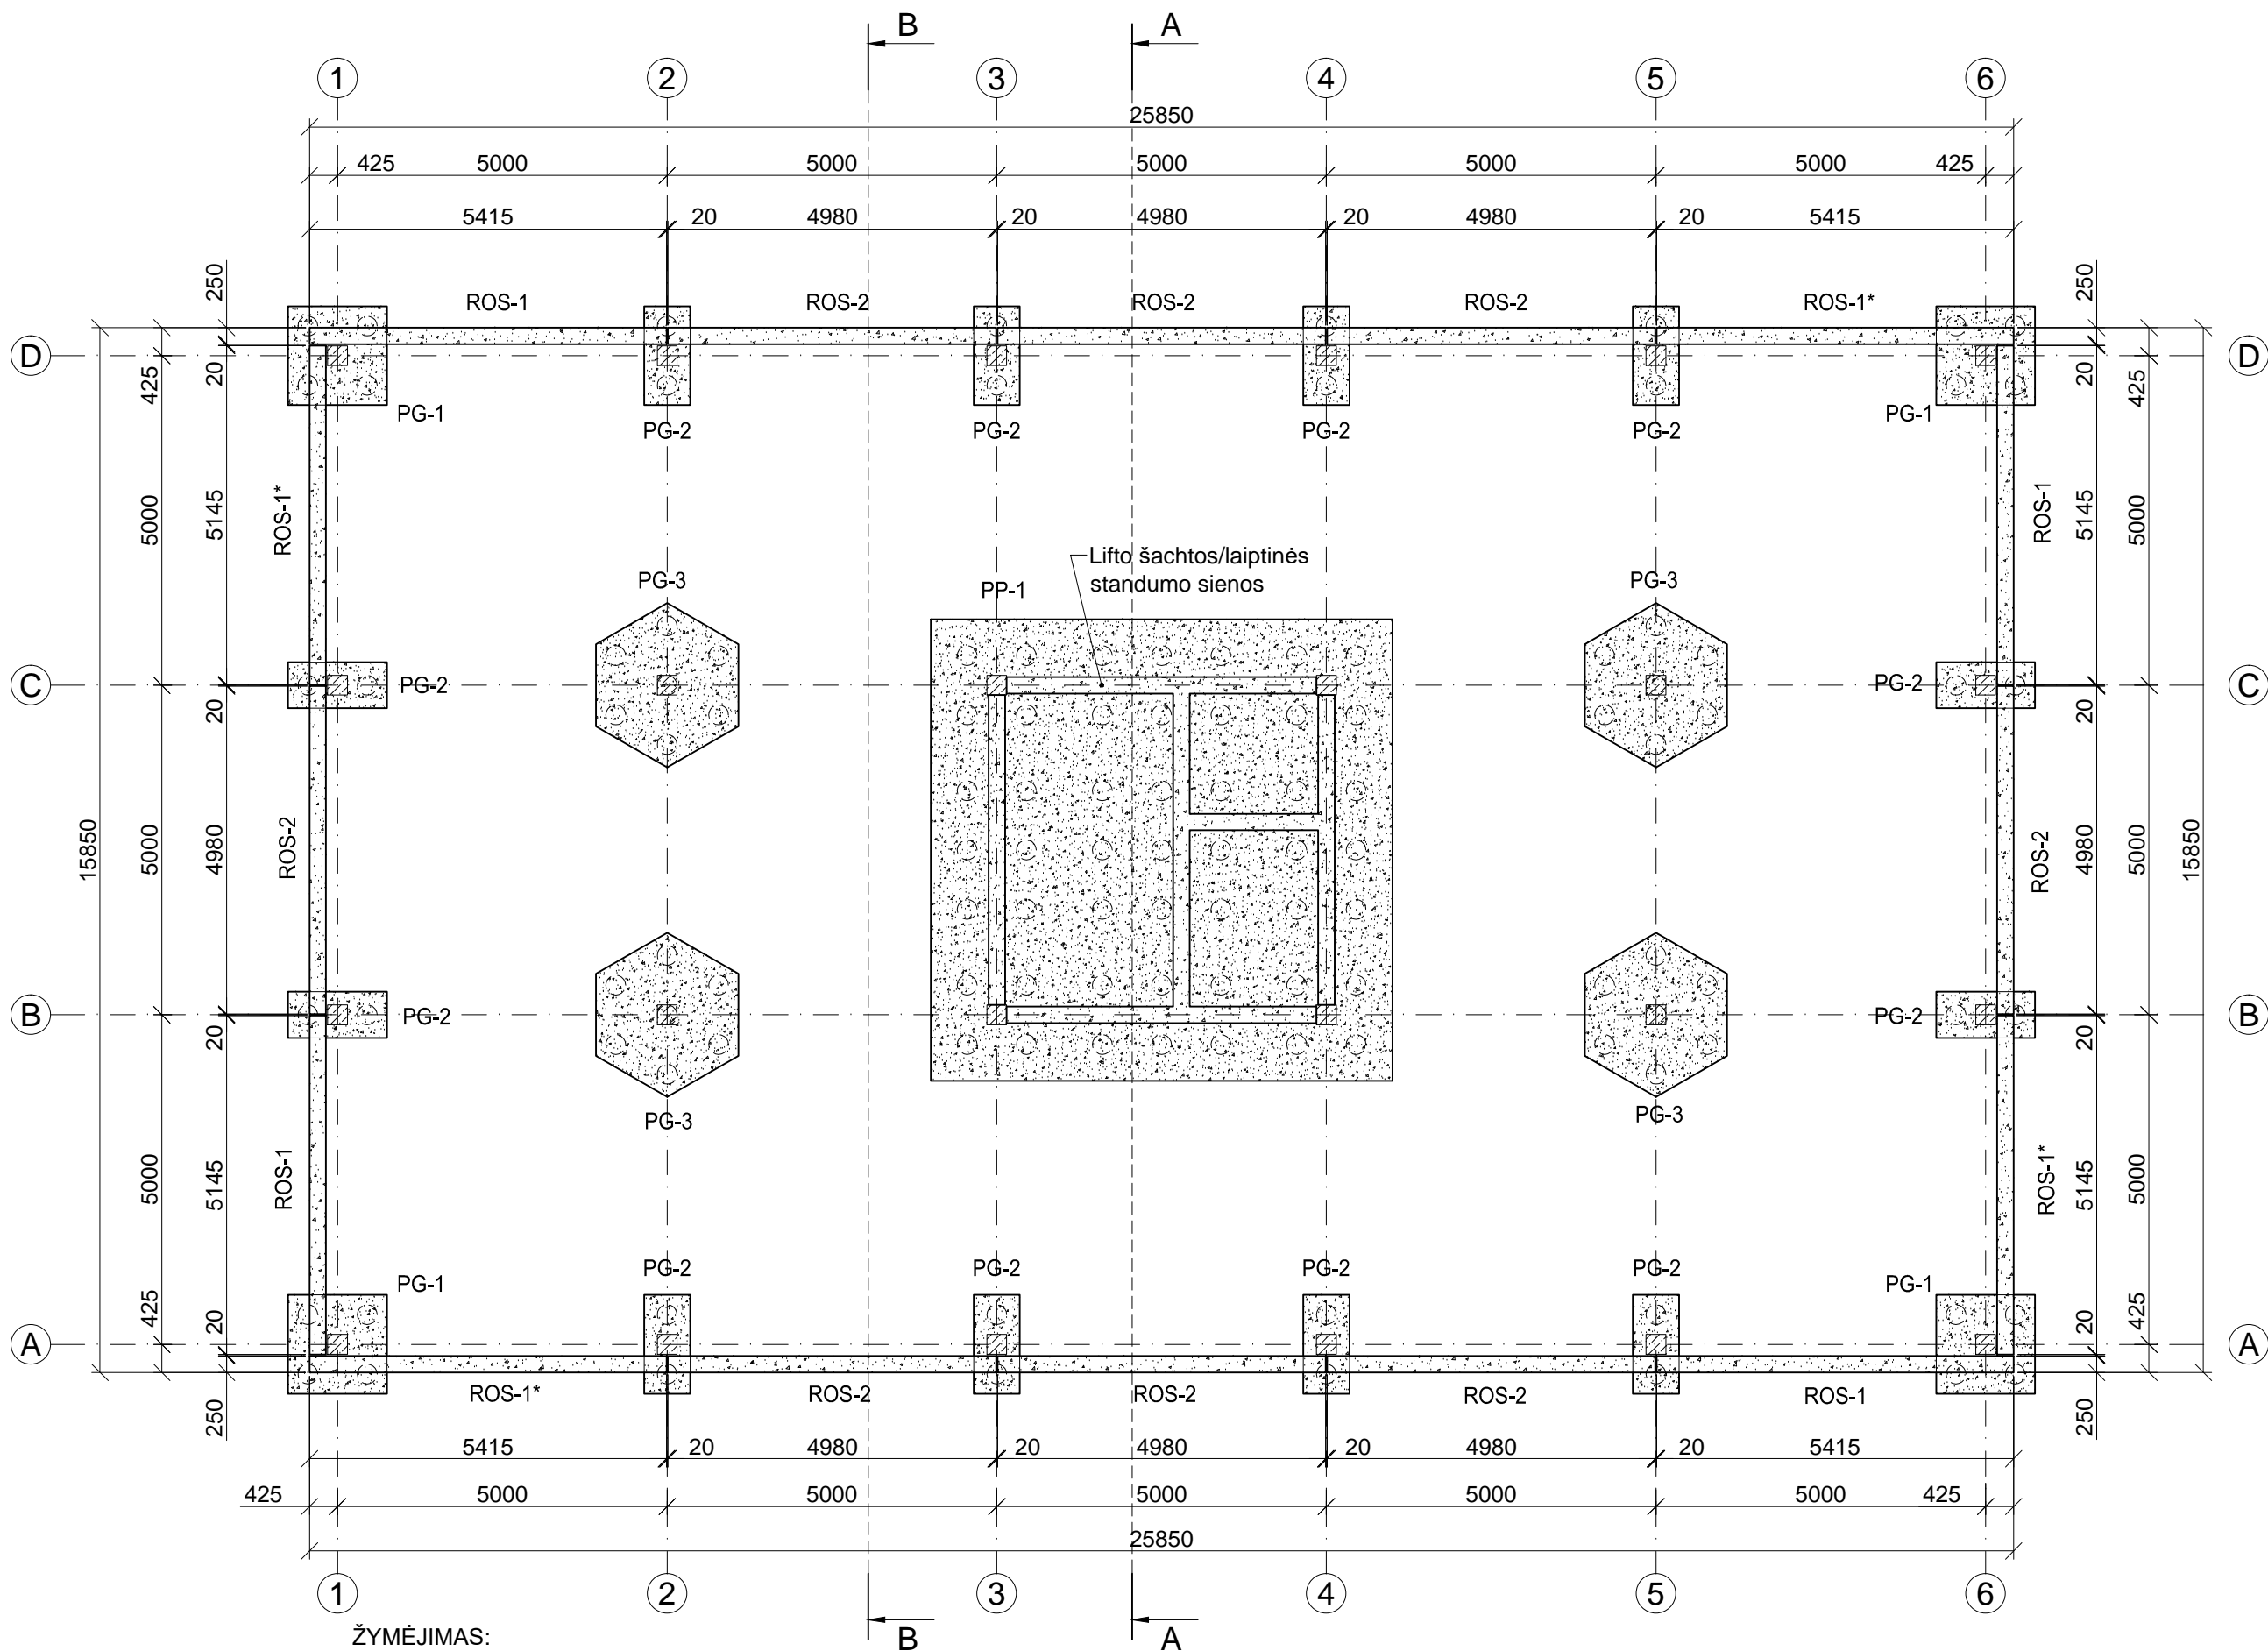

ROSTVERKŲ TVIRTINIMO PRIE KOLONOS MAZGAS MASTELIS 1:10

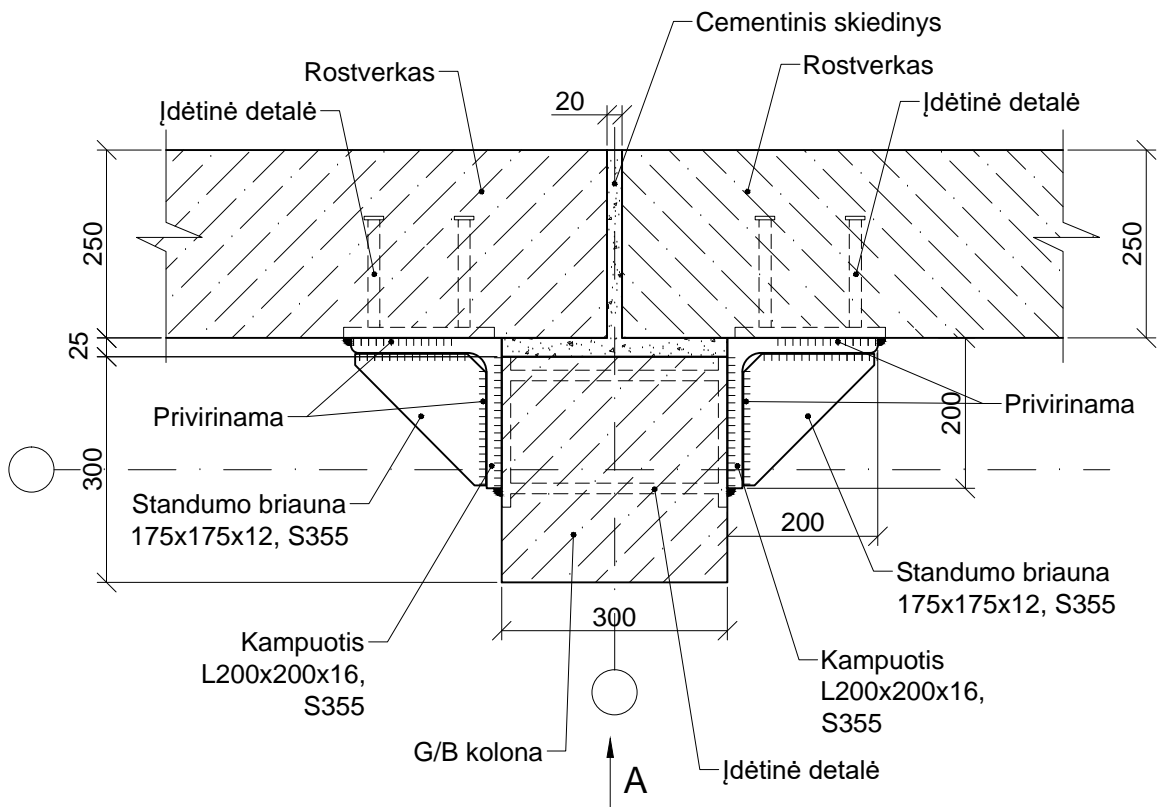

VAIZDAS A MASTELIS 1:10

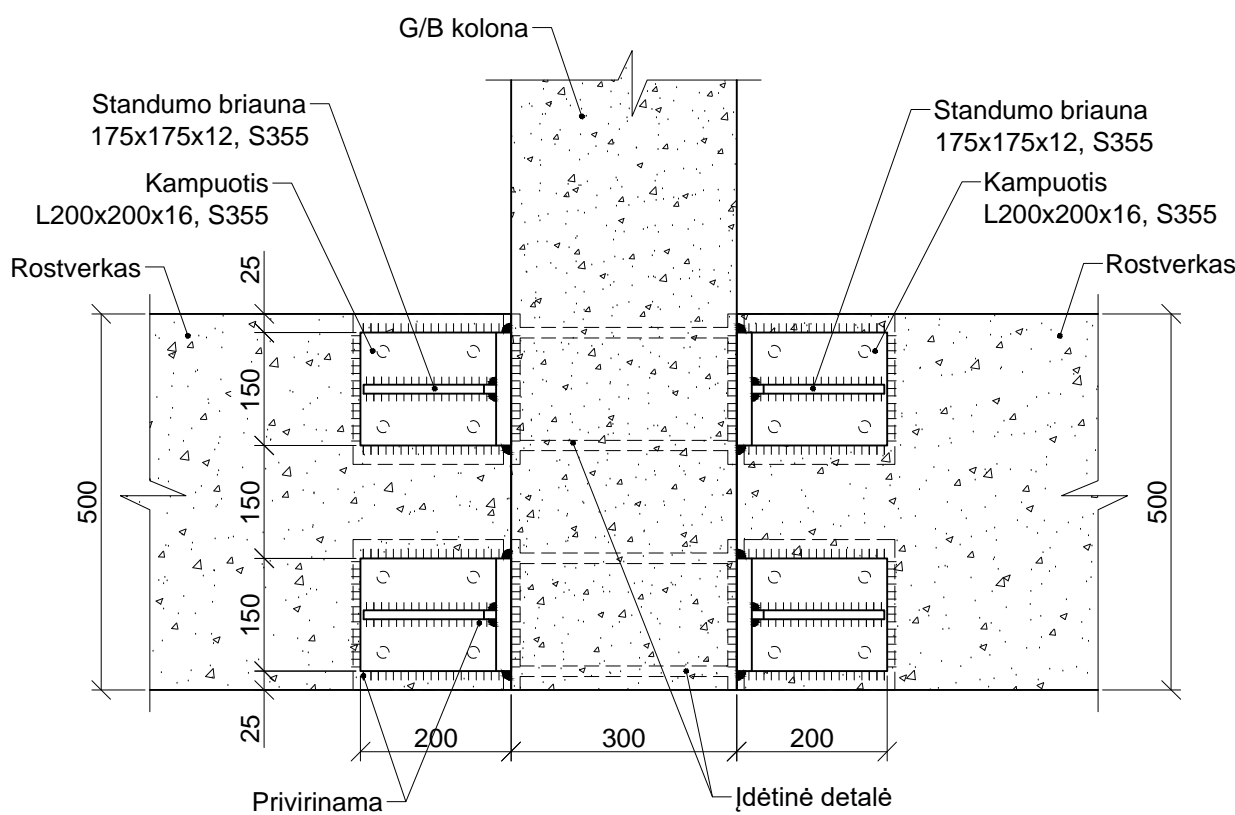

GALVENŲ PARUOŠIAMŲJŲ SLUOKSNIŲ SĄNAUDŲ KIEKIŲ ŽINIARAŠTIS

| Eil. Nr.         | Posicija | Pavadinimas                           | Žymuo | Mato vnt. | Kiekis | Sąnaudos Vien. | Iš viso | Svoris vnt., t | Papildomi duomenys |
|------------------|----------|---------------------------------------|-------|-----------|--------|----------------|---------|----------------|--------------------|
| 1                | PG-1     | Paruošiamasis sluoksnis 1700x1700x100 |       |           |        |                |         |                |                    |
| 2                |          | Betonas C8/10                         |       | m³        | 4      | 0.289          | 1.156   |                |                    |
| 3                | PG-2     | Paruošiamasis sluoksnis 1700x900x100  |       |           |        |                |         |                |                    |
| 4                |          | Betonas C8/10                         |       | m³        | 12     | 0.153          | 1.836   |                |                    |
| 5                | PG-3     | Paruošiamasis sluoksnis 2700x2400x100 |       |           |        |                |         |                |                    |
| 6                |          | Betonas C8/10                         |       | m³        | 4      | 0.404          | 1.616   |                |                    |
| 7                | PP-1     | Paruošiamasis sluoksnis 7200x7200x100 |       |           |        |                |         |                |                    |
| 8                |          | Betonas C8/10                         |       | m³        | 1      | 5.184          | 5.184   |                |                    |
| Viso betono, m³: |          |                                       |       |           |        |                | 9.792   |                |                    |

MONOLITINIŲ POLIŲ GALVENŲ SĄNAUDŲ KIEKIŲ ŽINIARAŠTIS

| Eil. Nr.                         | Posicija | Pavadinimas                     | Žymuo | Mato vnt. | Kiekis | Sąnaudos Vien. | Iš viso | Svoris vnt., t | Papildomi duomenys |
|----------------------------------|----------|---------------------------------|-------|-----------|--------|----------------|---------|----------------|--------------------|
| 1                                | PG-1     | Poliaus galvena 1500x1500x700   |       |           |        |                |         |                |                    |
| 2                                |          | Betonas C25/30 XC2              |       | m³        | 4      | 1.575          | 6.300   |                |                    |
| 3                                |          | Armatura S500                   |       | kg        | 4      | 157.5          | 630.0   |                |                    |
| 4                                |          | Idėtinų detalių plienas S355    |       | kg        | 4      | 20.00          | 80.00   |                |                    |
| 5                                | PG-2     | Poliaus galvena 1500x700x700    |       |           |        |                |         |                |                    |
| 6                                |          | Betonas C25/30 XC2              |       | m³        | 12     | 0.735          | 8.820   |                |                    |
| 7                                |          | Armatura S500                   |       | kg        | 12     | 73.5           | 882.0   |                |                    |
| 8                                |          | Idėtinų detalių plienas S355    |       | kg        | 12     | 20.00          | 240.00  |                |                    |
| 9                                | PG-3     | Poliaus galvena 2500x2160x700   |       |           |        |                |         |                |                    |
| 10                               |          | Betonas C25/30 XC2              |       | m³        | 4      | 2.826          | 11.304  |                |                    |
| 11                               |          | Armatura S500                   |       | kg        | 4      | 282.6          | 1130.4  |                |                    |
| 12                               |          | Idėtinų detalių plienas S355    |       | kg        | 4      | 20.00          | 80.00   |                |                    |
| 13                               | PP-1     | Plokštė ant polių 7000x7000x600 |       |           |        |                |         |                |                    |
| 14                               |          | Betonas C25/30 XC2              |       | m³        | 1      | 29.400         | 29.400  |                |                    |
| 15                               |          | Armatura S500                   |       | kg        | 1      | 2940.0         | 2940.0  |                |                    |
| 16                               |          | Idėtinų detalių plienas S355    |       | kg        | 1      | 80.00          | 80.00   |                |                    |
| Viso betono, m³:                 |          |                                 |       |           |        |                | 55.824  |                |                    |
| Viso armatūros, kg:              |          |                                 |       |           |        |                | 5582    |                |                    |
| Viso idėtinų detalių plieno, kg: |          |                                 |       |           |        |                | 480.00  |                |                    |

GELŽBETONINIŲ ROSTVERKŲ SĄNAUDŲ KIEKIŲ ŽINIARAŠTIS

| Eil. Nr.            | Posicija | Pavadinimas             | Žymuo | Mato vnt. | Kiekis | Sąnaudos Vien. | Iš viso | Svoris vnt., t | Papildomi duomenys |
|---------------------|----------|-------------------------|-------|-----------|--------|----------------|---------|----------------|--------------------|
| 1                   | ROS-1    | Rostverkas 5390x500x250 |       |           |        |                |         |                |                    |
| 2                   |          | Betonas C25/30 XC2      |       | m³        | 4      | 0.650          | 2.600   |                |                    |
| 3                   |          | Armatura S500           |       | kg        | 4      | 78.00          | 312.00  |                |                    |
| 4                   | ROS-1*   | Rostverkas 5390x500x250 |       |           |        |                |         |                |                    |
| 5                   |          | Betonas C25/30 XC2      |       | m³        | 4      | 0.650          | 2.600   |                |                    |
| 6                   |          | Armatura S500           |       | kg        | 4      | 78.00          | 312.00  |                |                    |
| 7                   | ROS-2    | Rostverkas 4980x500x250 |       |           |        |                |         |                |                    |
| 8                   |          | Betonas C25/30 XC2      |       | m³        | 8      | 0.611          | 4.888   |                |                    |
| 9                   |          | Armatura S500           |       | kg        | 8      | 73.32          | 586.56  |                |                    |
| Viso betono, m³:    |          |                         |       |           |        |                | 10.088  |                |                    |
| Viso armatūros, kg: |          |                         |       |           |        |                | 1210.6  |                |                    |

GELŽBETONINIŲ ROSTVERKŲ TVIRTINIMO SĄNAUDŲ KIEKIŲ ŽINIARAŠTIS

| Eil. Nr.         | Posicija | Pavadinimas                  | Žymuo | Mato vnt. | Kiekis | Sąnaudos Vien. | Iš viso | Svoris vnt., t | Papildomi duomenys |
|------------------|----------|------------------------------|-------|-----------|--------|----------------|---------|----------------|--------------------|
| 1                | ROS-1    | Rostverkas 5390x500x250      |       |           |        |                |         |                |                    |
| 2                |          | Idėtinės plieno detalės S355 |       | kg        | 4      | 20             | 80.0    |                |                    |
| 3                |          | Jungimo plienas S355         |       | kg        | 4      | 40             | 160.0   |                |                    |
| 4                | ROS-1*   | Rostverkas 5390x500x250      |       |           |        |                |         |                |                    |
| 5                |          | Idėtinės plieno detalės S355 |       | kg        | 4      | 20             | 80.0    |                |                    |
| 6                |          | Jungimo plienas S355         |       | kg        | 4      | 40             | 160.0   |                |                    |
| 7                | ROS-2    | Rostverkas 4980x500x250      |       |           |        |                |         |                |                    |
| 8                |          | Idėtinės plieno detalės S355 |       | kg        | 8      | 20             | 160.0   |                |                    |
| 9                |          | Jungimo plienas S355         |       | kg        | 8      | 40             | 320.0   |                |                    |
| Viso plieno, kg: |          |                              |       |           |        |                | 960.0   |                |                    |

PASTABOS:

- Pamatus gali įrengti tik kvalifikuotas rangovas.
- Pamatų gali būti įrengiami, tik vadovaujantis darbo projektu. Už pamatų įrengimo darbų kokybę atsako rangovas.
- Gruntas po pamatais turi būti nejudintas, vientisos struktūros.
- Pamatų galvenos įrengiamos ant C8/10 paruošiamojo betono sluoksnio, prieš tai sutankinus esamą žvyraingą smėlį, k=0.96.
- Pamatų galvenos užpilamos žvyro/smėlio mišiniu, pastarąjį sutankinant, k=0.96.
- Ant galvenos viršaus tepama hidroizoliacija, jei ant jos įrengiama gelžbetoninė konstrukcija.
- Monolitinės galvenos ir rostvergai armuojami S500 stiprumo klasės armatūros tinklais ir strypynais, pagal LST EN ISO 15630-1:2010.
- Monolitinėms galvenoms ir rostverkams naudojamas C25/30, XC2, stiprumo klasės betonas, pagal LST EN 206-1:2002.

|                            |                                                                                                                   |                                                                                                                                                                      |         |                                                                                                                       |  |        |      |
|----------------------------|-------------------------------------------------------------------------------------------------------------------|----------------------------------------------------------------------------------------------------------------------------------------------------------------------|---------|-----------------------------------------------------------------------------------------------------------------------|--|--------|------|
| KVAL.<br>PATV.<br>DOK. NR. |                              | UAB "Konstrukcijų pasaulis"<br>Jonavos g. 260, Kaunas<br>Įm. k.: 304690224<br>Tel. +370 (613) 98089<br>El.p.: k.pazereckas@gmail.com<br>www.konstrukciju-pasaulis.lt |         | STATINIO PROJEKTO PAVADINIMAS<br>Negyvenamasis 5 aukštų surenkamo gelžbetonio konstrukcijų mokslo paskirties pastatas |  |        |      |
| 37603                      | PDV                                                                                                               | Kęstutis Pažereckas                                                                                                                                                  | 2018 08 | DOKUMENTO PAVADINIMAS<br>Polių galvenų ir rostverkų planas                                                            |  | LAIDAI |      |
| 37603                      | Konstr.                                                                                                           | Kęstutis Pažereckas                                                                                                                                                  | 2018 08 |                                                                                                                       |  | O      |      |
|                            |                                                                                                                   |                                                                                                                                                                      |         |                                                                                                                       |  |        |      |
| LT                         | UŽSAKOVAS                                                                                                         |                                                                                                                                                                      |         | BRĖŽINIO ŽYMUO                                                                                                        |  | LAPAS  | LAPŲ |
|                            | Miškų institutas, Lietuvos agrarinių ir miškų mokslų centro filialas, Liepų g. 1, Girionių k., LT-53101, Kauno r. |                                                                                                                                                                      |         | KPRS18/02-TP-SK-3.4                                                                                                   |  |        |      |
|                            |                                                                                                                   |                                                                                                                                                                      |         |                                                                                                                       |  | 1      | 1    |

POLIAUS GALVENA PG-1 MASTELIS 1:25

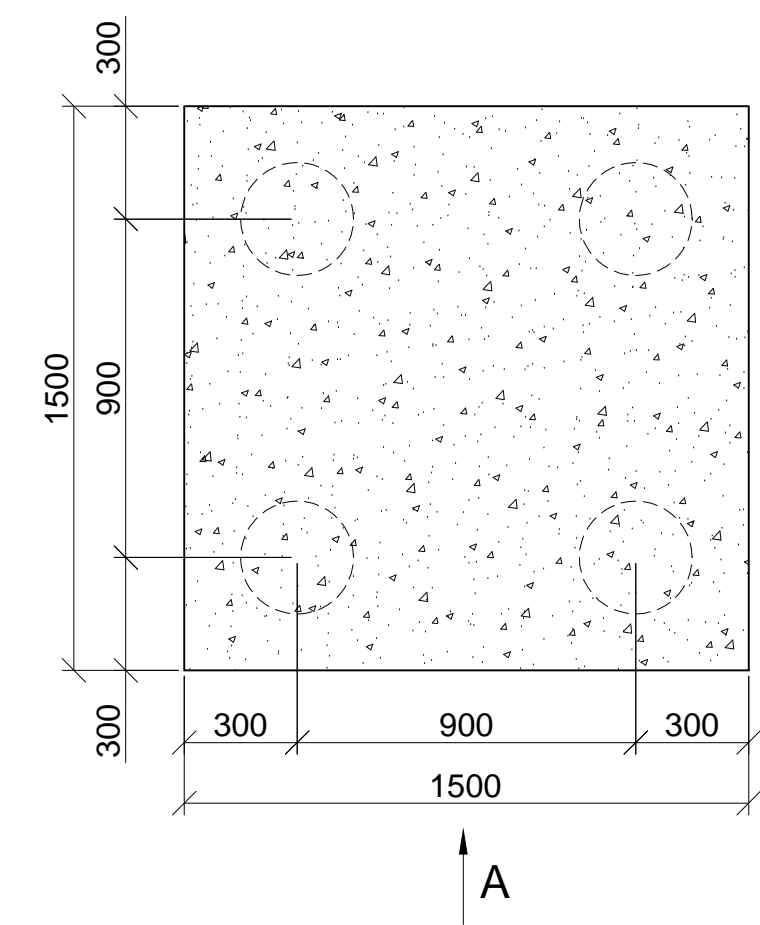

VAIZDAS A MASTELIS 1:25

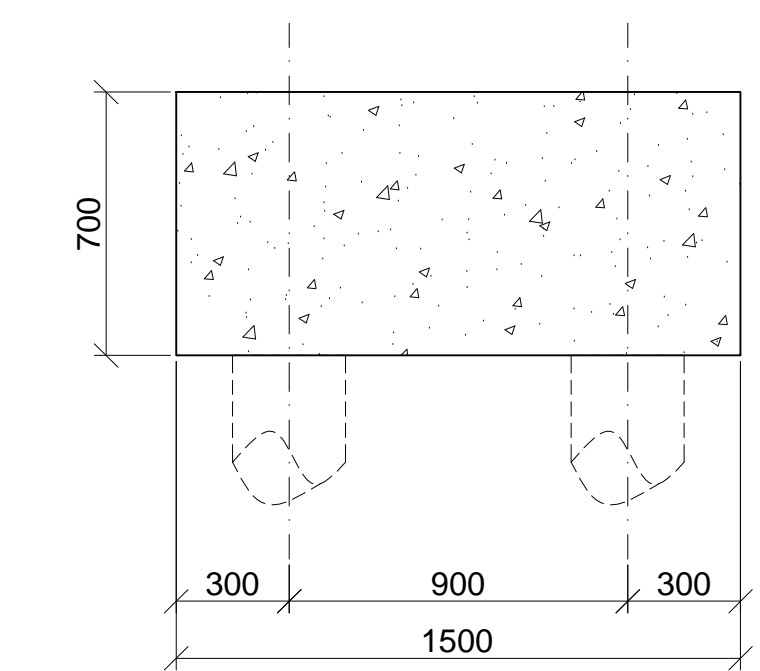

PLOKŠTĖ ANT POLIŲ  
PP-1 MASTELIS 1:100

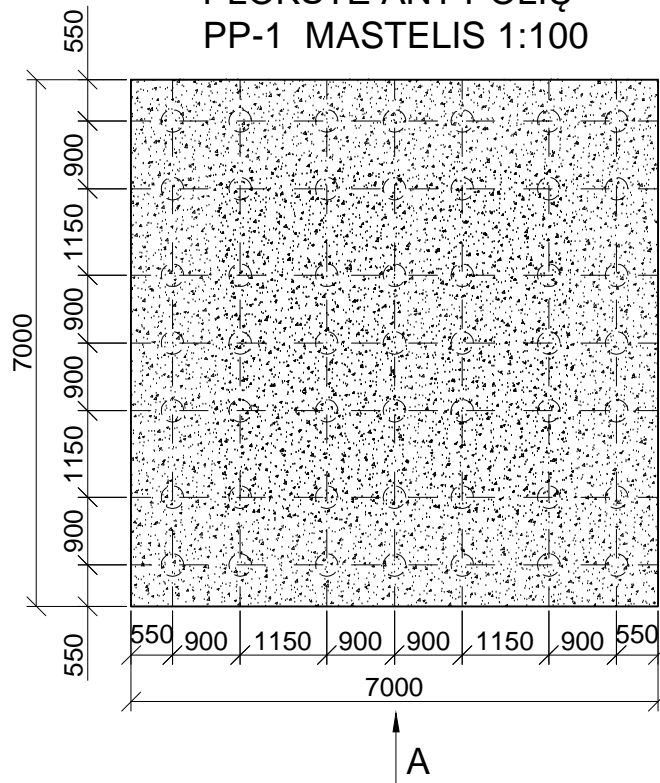

POLIAUS GALVENA PG-2 MASTELIS 1:25

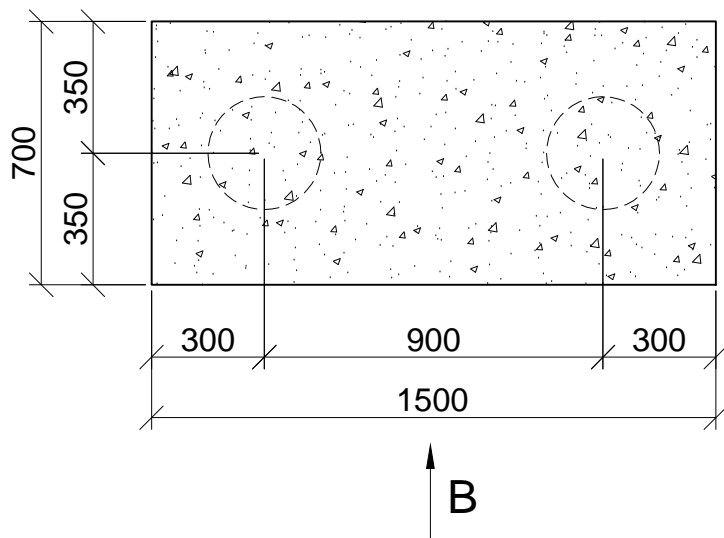

VAIZDAS B MASTELIS 1:25

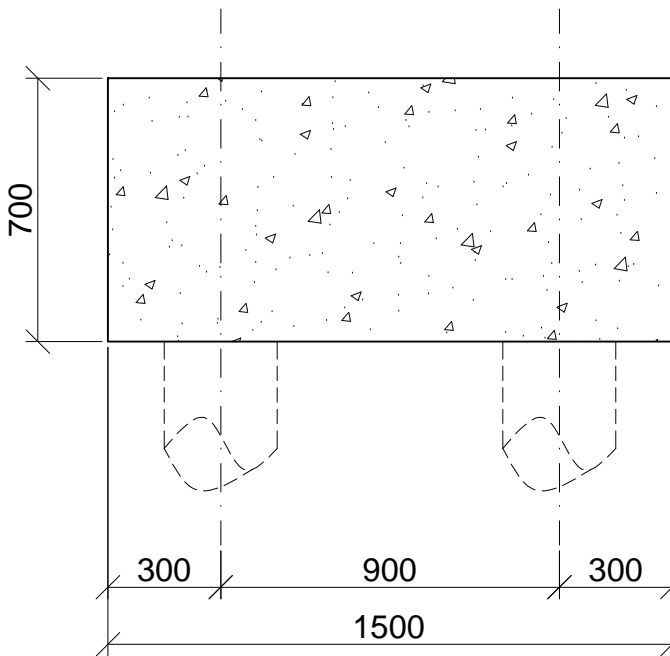

POLIAUS GALVENA PG-3 MASTELIS 1:25

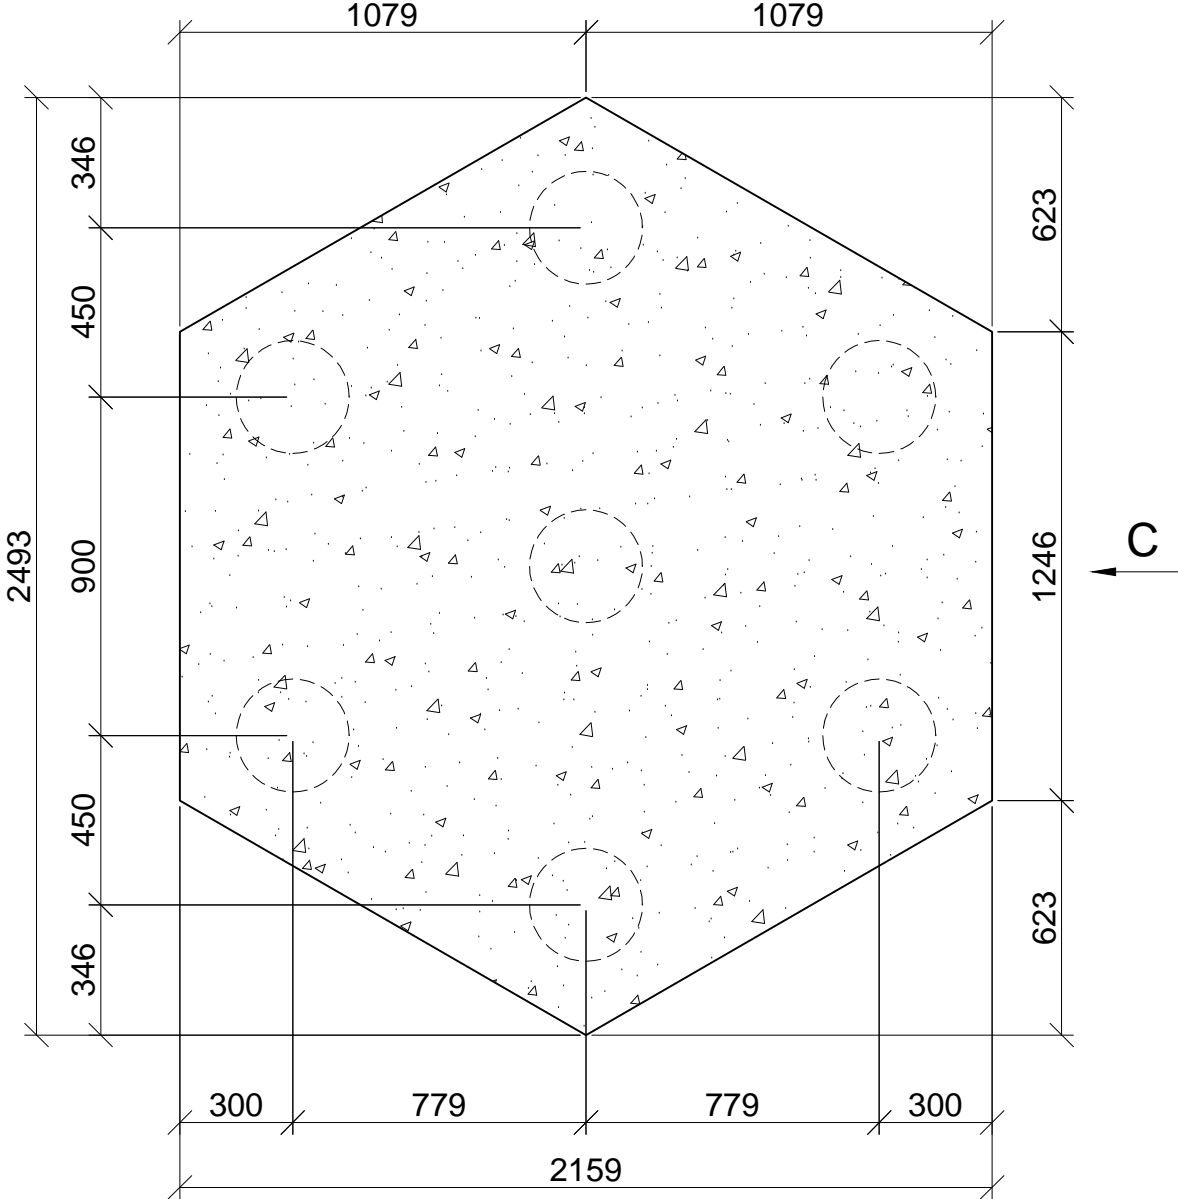

VAIZDAS C MASTELIS 1:25

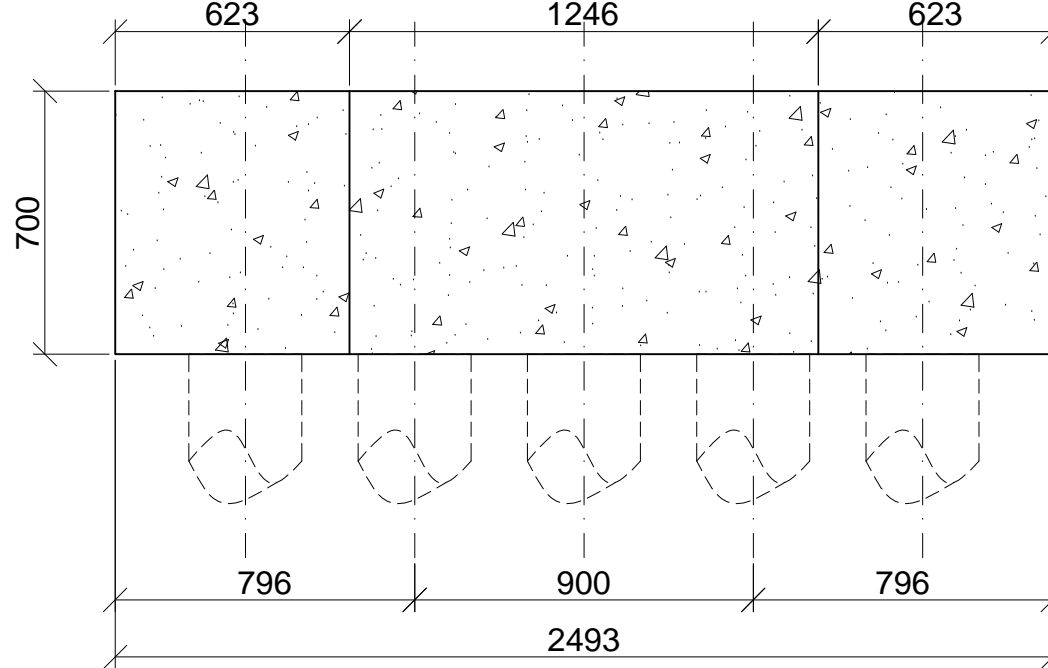

VAIZDAS A MASTELIS 1:50

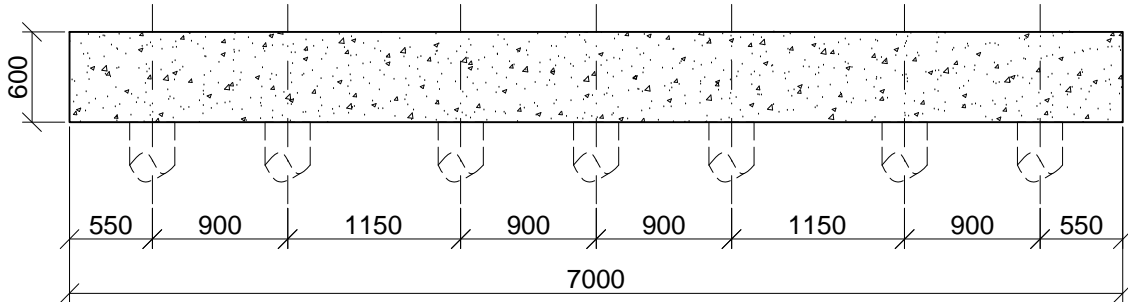

|                            |                                                                                                                      |                                                                                                                                     |         |                     |                                                                                         |                       |       |       |
|----------------------------|----------------------------------------------------------------------------------------------------------------------|-------------------------------------------------------------------------------------------------------------------------------------|---------|---------------------|-----------------------------------------------------------------------------------------|-----------------------|-------|-------|
| KVAL.<br>PATV.<br>DOK. NR. |                                                                                                                      | UAB "Konstrukcijų pasaulis"                                                                                                         |         |                     | STATINIO PROJEKTO PAVADINIMAS                                                           |                       |       |       |
|                            |                                                                                                                      | Jonavos g. 260, Kaunas<br>Įm. k. 304690224<br>Tel. +370 (613) 98089<br>El.p. k.pazereckas@gmail.com<br>www.konstrukciju-pasaulis.lt |         |                     | Negyvenamasis 5 aukštų surenkamo gelžbetonio konstrukcijų<br>mokslo paskirties pastatas |                       |       |       |
|                            |                                                                                                                      | 37603                                                                                                                               | PDV     | Kęstutis Pažereckas | 2018 08                                                                                 | DOKUMENTO PAVADINIMAS |       | LAIDA |
|                            |                                                                                                                      | 37603                                                                                                                               | Konstr. | Kęstutis Pažereckas | 2018 08                                                                                 | Polijų galvenos       |       | O     |
|                            |                                                                                                                      |                                                                                                                                     |         |                     |                                                                                         |                       |       |       |
| LT                         | UŽSAKOVAS                                                                                                            |                                                                                                                                     |         |                     | BRĖŽINIO ŽYMUO                                                                          |                       | LAPAS | LAPŲ  |
|                            | Miškų institutas, Lietuvos agrarinių ir miškų mokslų<br>centro filialas, Liepų g. 1, Girionių k., LT-53101, Kauno r. |                                                                                                                                     |         |                     | KPRS18/02-TP-SK-3.5                                                                     |                       | 1     | 1     |
|                            |                                                                                                                      |                                                                                                                                     |         |                     |                                                                                         |                       |       |       |

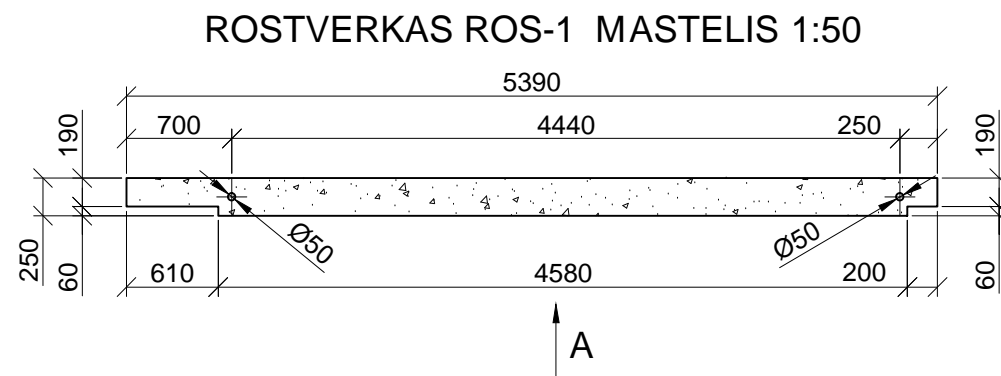

VAIZDAS A MASTELIS 1:50

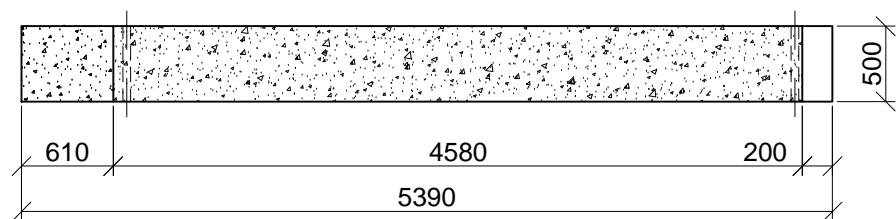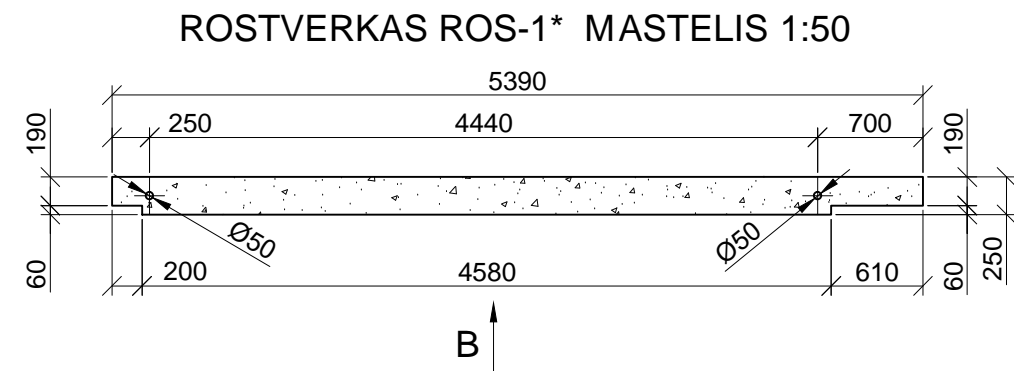

VAIZDAS B MASTELIS 1:50

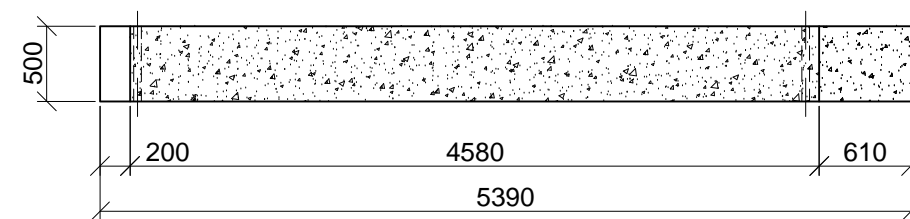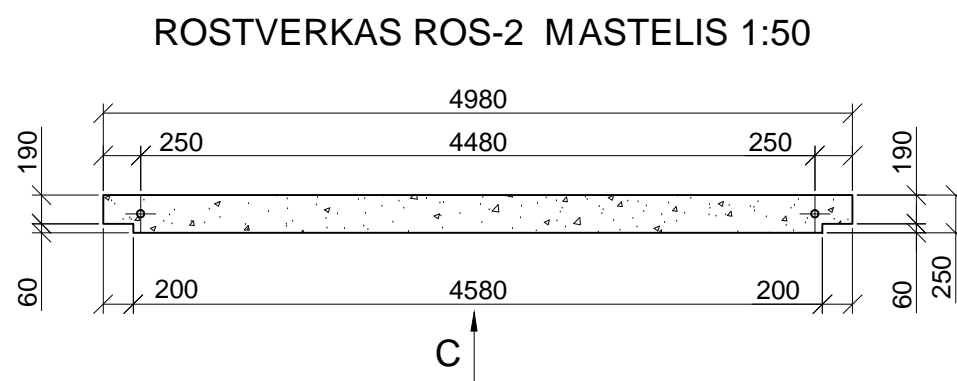

VAIZDAS B MASTELIS 1:50

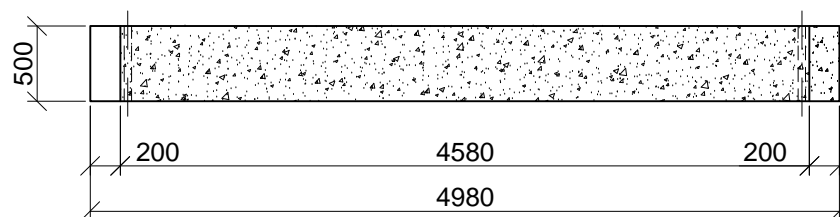

|                              |                                                                                                                      |                               |         |                                                           |  |  |       |
|------------------------------|----------------------------------------------------------------------------------------------------------------------|-------------------------------|---------|-----------------------------------------------------------|--|--|-------|
| KVAL.<br>PATV.<br>DOK. NR.   |                                                                                                                      | UAB "Konstrukcijų pasaulis"   |         | STATINIO PROJEKTO PAVADINIMAS                             |  |  |       |
|                              |                                                                                                                      | Jonavos g. 260, Kaunas        |         | Negyvenamasis 5 aukštų surenkamo gelžbetonio konstrukcijų |  |  |       |
|                              |                                                                                                                      | Įm. k.: 304690224             |         | mokslo paskirties pastatas                                |  |  |       |
|                              |                                                                                                                      | Tel. +370 (613) 98089         |         |                                                           |  |  |       |
|                              |                                                                                                                      | El.p.: k.pazereckas@gmail.com |         |                                                           |  |  |       |
| www.konstrukciju-pasaulis.lt |                                                                                                                      |                               |         |                                                           |  |  |       |
| 37603                        | PDV                                                                                                                  | Kęstutis Pažereckas           | 2018 08 | DOKUMENTO PAVADINIMAS                                     |  |  | LAIDA |
| 37603                        | Konstr.                                                                                                              | Kęstutis Pažereckas           | 2018 08 | Rostverkai                                                |  |  | O     |
|                              |                                                                                                                      |                               |         |                                                           |  |  |       |
| LT                           | UŽSAKOVAS                                                                                                            |                               |         | BRĖŽINIO ŽYMUO                                            |  |  | LAPAS |
|                              | Miškų institutas, Lietuvos agrarinių ir miškų mokslų<br>centro filialas, Liepų g. 1, Girionių k., LT-53101, Kauno r. |                               |         | KPRS18/02-TP-SK-3.6                                       |  |  | 1     |
|                              |                                                                                                                      |                               |         |                                                           |  |  | 1     |



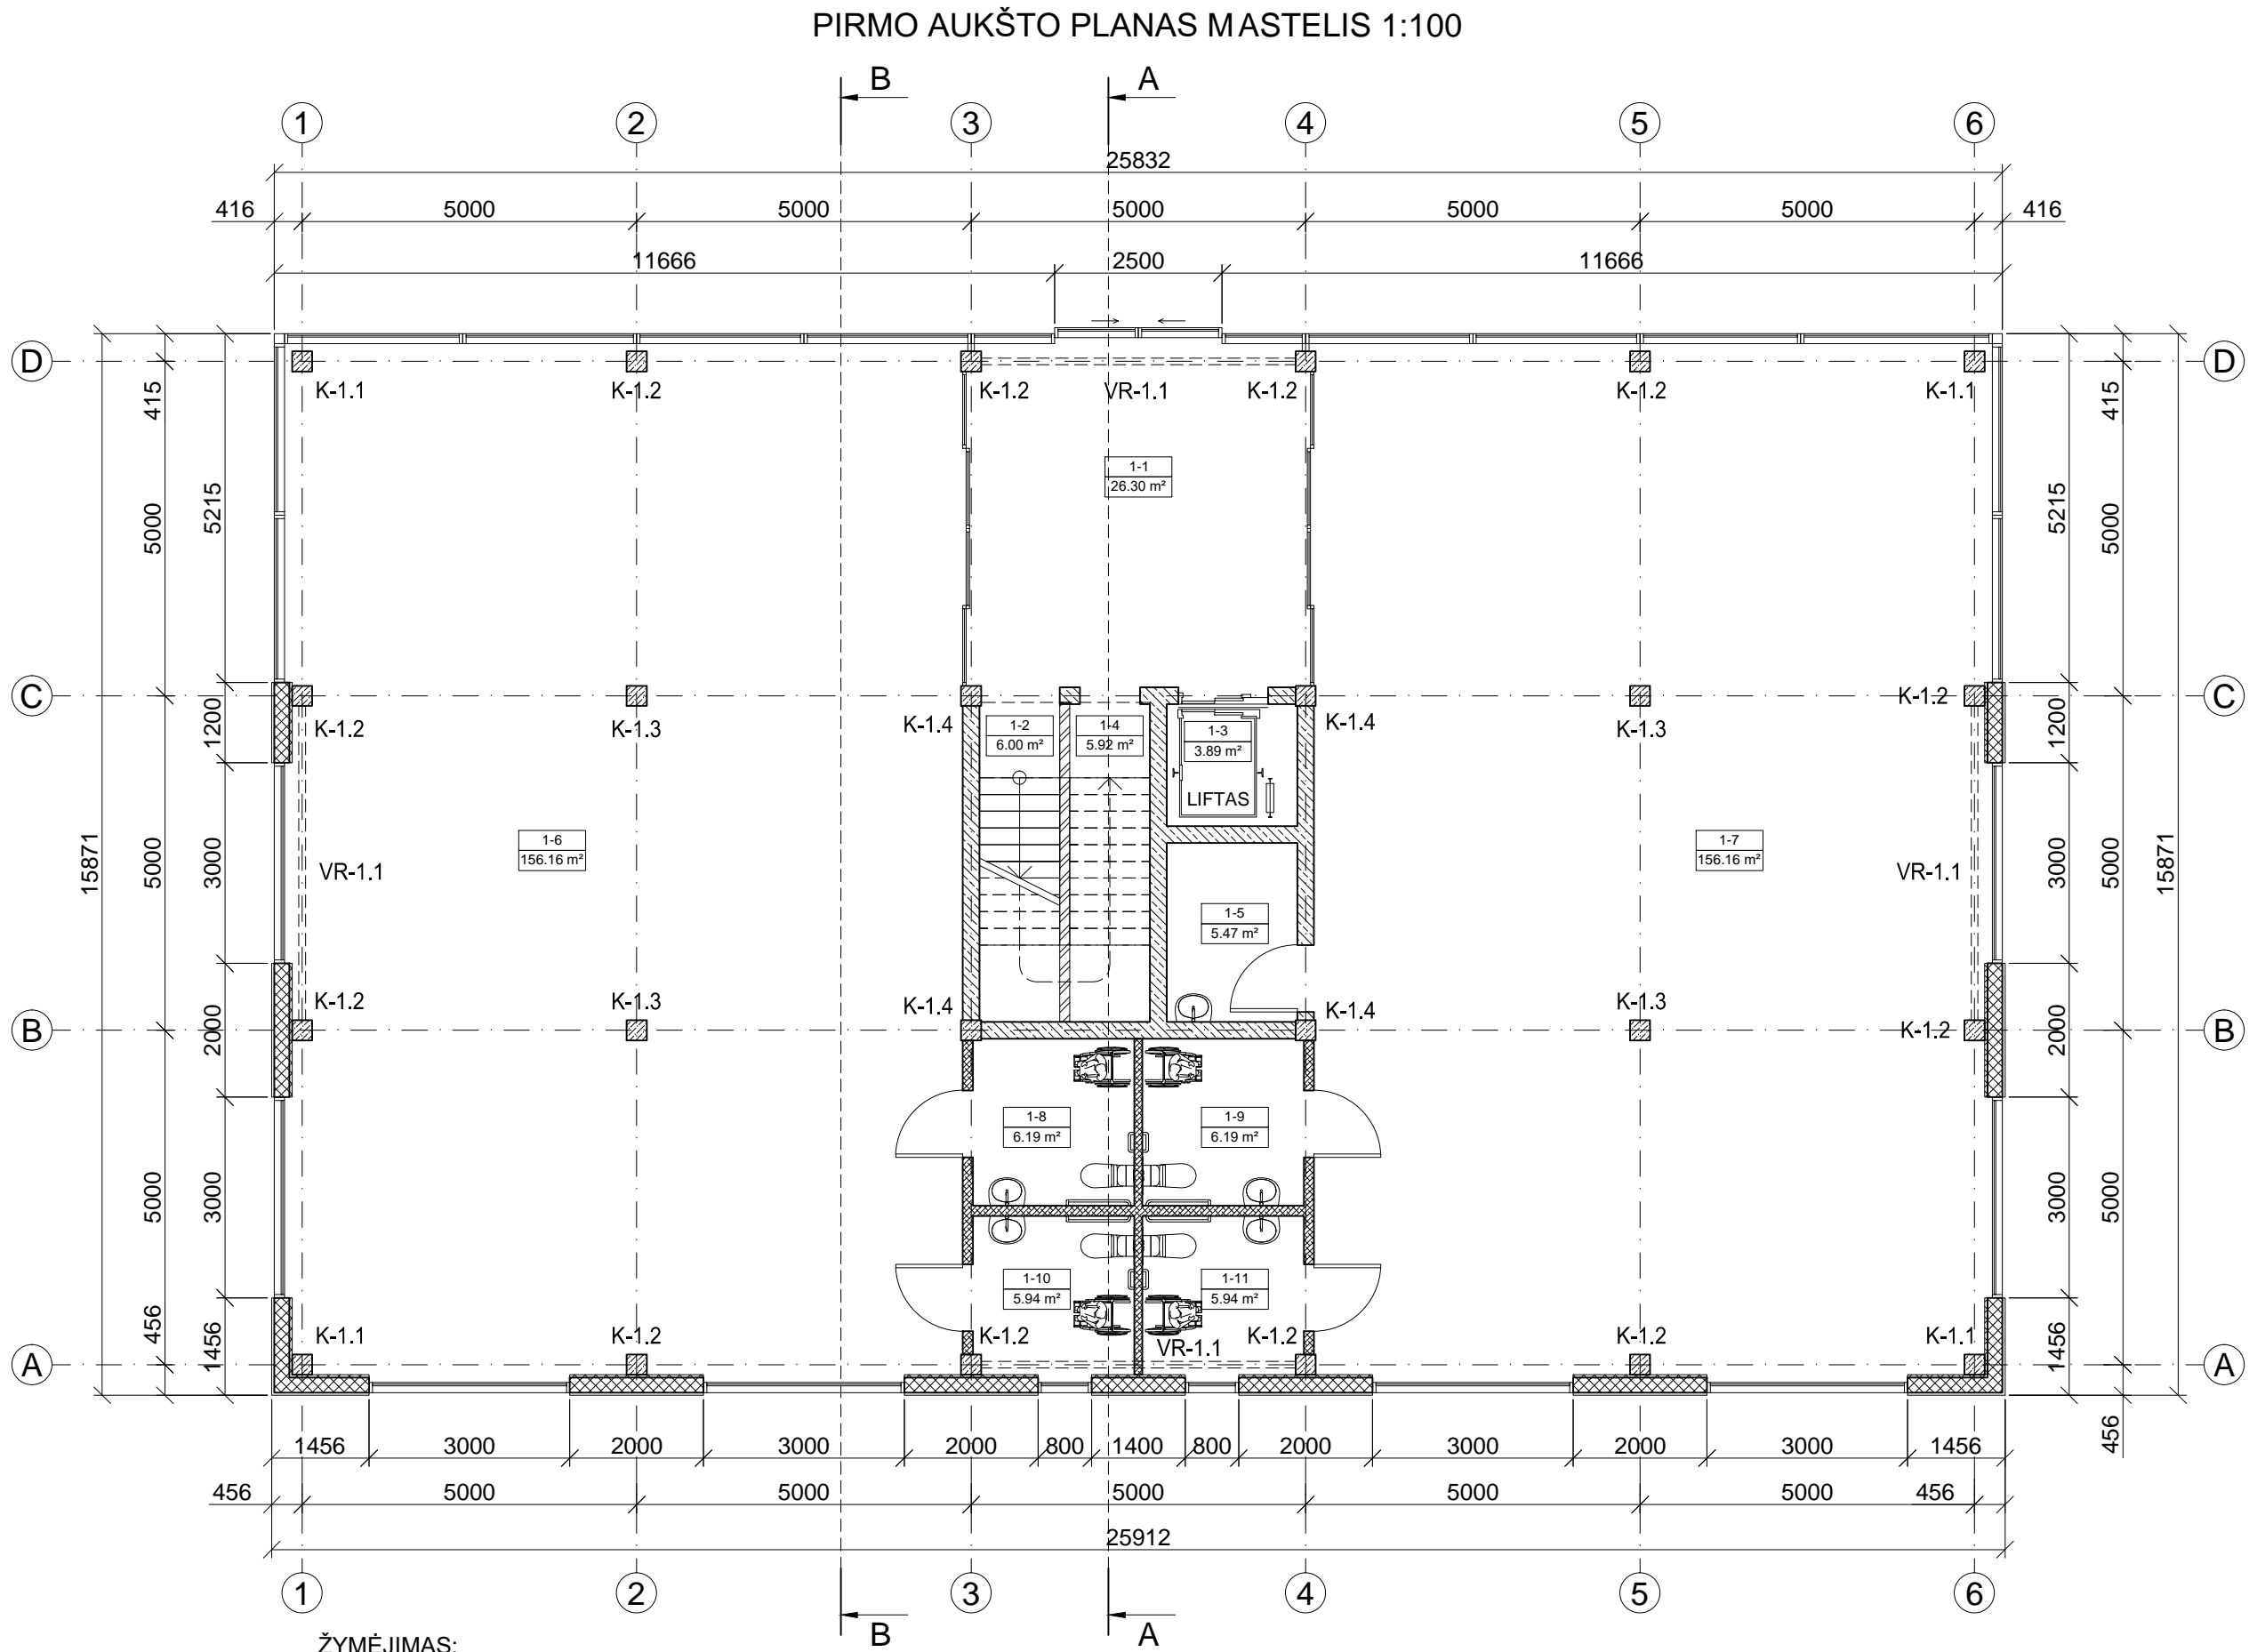

ŽYMĖJIMAS:  
K-... - Gelžbetoninė surenkama kolona;  
VR-... - Plieniniai vertikalieji ryšiai;

| Patalpų eksplikacija |                  |           |
|----------------------|------------------|-----------|
| Numeris              | Patalpa          | Plotas    |
| 1-1                  | Fojė             | 26.30 m²  |
| 1-2                  | Laiptinė         | 6.00 m²   |
| 1-3                  | Lifto šachta     | 3.89 m²   |
| 1-4                  | Tech. patalpa    | 5.92 m²   |
| 1-5                  | Tech. patalpa    | 5.47 m²   |
| 1-6                  | Ištaigų patalpos | 156.16 m² |
| 1-7                  | Ištaigų patalpos | 156.16 m² |
| 1-8                  | San. mazgas      | 6.19 m²   |
| 1-9                  | San. mazgas      | 6.19 m²   |
| 1-10                 | San. mazgas      | 5.94 m²   |
| 1-11                 | San. mazgas      | 5.94 m²   |
| Viso aukšte:         |                  | 384.16 m² |
| Viso pastate:        |                  | 768.01 m² |

- PASTABOS:
- Surenkamų g/b kolonų montavimui ant pamato bei tarpusavio sujungimams naudojami inkariniai varžtai ir kolonų padai.
  - Surenkamų g/b kolonų įdėtinės detalės projektuojamos darbo projekto stadijoje.
  - Gelžbetoninėms kolonoms naudojamas C30/37, F150, XC1 stiprumo klasės betonas, pagal LST EN 206-1:2002.
  - Gelžbetoninės kolonos armuojamos S500 stiprumo klasės armatūros strypynais, pagal LST EN ISO 15630-1:2010. Gelžbetoninių kolonų išilginė armatūra sujungiama užleidimu, praeičiant ne mažiau 40·d (d - didesnio iš jungiamųjų strypų skersmuo).
  - Gelžbetonio kolonų atsparumas ugniai R60 min.
  - Monolitinėms laiptinių ir lifto šachtų standumo sienoms naudojamas C30/37 X0 klasės betonas, pagal LST EN 206-1:2002.
  - Monolitiniai elementai armuojami S500 stiprumo klasės armatūros tinklais ir/ar strypynais, pagal LST EN ISO 15630-1:2010.
  - Metalinėms konstrukcijoms ir elementams naudojamas S355 stiprumo klasės plienas.
  - Suvirinimo jungčių briaunų paruošimas turi būti atliekamas pagal EN ISO 9692-1.
  - Metaliniai elementai tarpusavyje suvirinami, siūlės aukštis 1,2·kf - plonesniojo iš jungiamųjų elementų storis (jei nenurodyta kitaip), pagal LST EN ISO 9692-1:2004.
  - Konstrukcijų suvirinimui naudojamas suvirinimo medžiagos užtikrinančios suvirinimo siūlės skaičiuojamuosius stiprius ne mažesnius nei suvirinamo metalo.
  - Metaliniai paviršiai gruntuojami ir dažomi, pagal LST EN ISO 12944-2:2000.
  - Skylės varžtams daromos 2 mm didesnės nei varžto diametras (jei brėžinyje nenurodyta kitaip).
  - Darbai vykdomi pagal darbo projektą.

GELŽBETONINIŲ PIRMO AUKŠTO KOLONŲ SĄNAUDŲ KIEKIŲ ŽINIARAŠTIS

| Eil. Nr. | Pozicija | Pavadinimas                  | Žymuo | Mato vnt. | Kiekis | Sąnaudos                         |         | Svoris vnt., t | Papildomi duomenys |
|----------|----------|------------------------------|-------|-----------|--------|----------------------------------|---------|----------------|--------------------|
|          |          |                              |       |           |        | Vien.                            | Iš viso |                |                    |
| 1        | K-1.1    | Kolona 300x300x4090          |       |           |        |                                  |         |                |                    |
| 2        |          | Betonas C30/37 X0            |       | m³        | 4      | 0.368                            | 1.472   |                |                    |
| 3        |          | Armatūra S500                |       | kg        | 4      | 36.80                            | 147.20  |                |                    |
| 4        |          | Įdėtinų detalių plienas S355 |       | kg        | 4      | 60.00                            | 240.00  |                |                    |
| 5        | K-1.2    | Kolona 300x300x4090          |       |           |        |                                  |         |                |                    |
| 6        |          | Betonas C30/37 X0            |       | m³        | 12     | 0.368                            | 4.416   |                |                    |
| 7        |          | Armatūra S500                |       | kg        | 12     | 36.80                            | 441.60  |                |                    |
| 8        |          | Įdėtinų detalių plienas S355 |       | kg        | 12     | 60.00                            | 720.00  |                |                    |
| 9        | K-1.3    | Kolona 300x300x4090          |       |           |        |                                  |         |                |                    |
| 10       |          | Betonas C30/37 X0            |       | m³        | 4      | 0.368                            | 1.472   |                |                    |
| 11       |          | Armatūra S500                |       | kg        | 4      | 36.80                            | 147.20  |                |                    |
| 12       |          | Įdėtinų detalių plienas S355 |       | kg        | 4      | 60.00                            | 240.00  |                |                    |
| 13       | K-1.4    | Kolona 300x300x4090          |       |           |        |                                  |         |                |                    |
| 14       |          | Betonas C30/37 X0            |       | m³        | 4      | 0.368                            | 1.472   |                |                    |
| 15       |          | Armatūra S500                |       | kg        | 4      | 36.80                            | 147.20  |                |                    |
| 16       |          | Įdėtinų detalių plienas S355 |       | kg        | 4      | 60.00                            | 240.00  |                |                    |
|          |          |                              |       |           |        | Viso betono, m³:                 |         | 8.832          |                    |
|          |          |                              |       |           |        | Viso armatūros, kg:              |         | 883.2          |                    |
|          |          |                              |       |           |        | Viso įdėtinų detalių plieno, kg: |         | 1440.0         |                    |

GELŽBETONINIŲ PIRMO AUKŠTO KOLONŲ MONOLITINIMO SĄNAUDŲ KIEKIŲ ŽINIARAŠTIS

| Eil. Nr. | Pozicija | Pavadinimas                      | Žymuo | Mato vnt. | Kiekis | Sąnaudos                                   |         | Svoris vnt., t | Papildomi duomenys |
|----------|----------|----------------------------------|-------|-----------|--------|--------------------------------------------|---------|----------------|--------------------|
|          |          |                                  |       |           |        | Vien.                                      | Iš viso |                |                    |
| 1        | K-1.1    | Kolona 300x300x4090              |       |           |        |                                            |         |                |                    |
| 2        |          | Nesitraukiantis skiedinys C30/37 |       | m³        | 4      | 0.019                                      | 0.074   |                |                    |
| 3        | K-1.2    | Kolona 300x300x4090              |       |           |        |                                            |         |                |                    |
| 4        |          | Nesitraukiantis skiedinys C30/37 |       | m³        | 12     | 0.019                                      | 0.222   |                |                    |
| 5        | K-1.3    | Kolona 300x300x4090              |       |           |        |                                            |         |                |                    |
| 6        |          | Nesitraukiantis skiedinys C30/37 |       | m³        | 4      | 0.019                                      | 0.074   |                |                    |
| 7        | K-1.4    | Kolona 300x300x4090              |       |           |        |                                            |         |                |                    |
| 8        |          | Nesitraukiantis skiedinys C30/37 |       | m³        | 4      | 0.019                                      | 0.074   |                |                    |
|          |          |                                  |       |           |        | Viso nesitraukiančio skiedinio C30/37, m³: |         | 0.444          |                    |

PIRMO AUKŠTO PLIENINIŲ RYŠIŲ SĄNAUDŲ KIEKIŲ ŽINIARAŠTIS

| Eil. Nr. | Pozicija | Pavadinimas                  | Žymuo | Mato vnt. | Kiekis | Sąnaudos         |         | Svoris vnt., t | Papildomi duomenys |
|----------|----------|------------------------------|-------|-----------|--------|------------------|---------|----------------|--------------------|
|          |          |                              |       |           |        | Vien.            | Iš viso |                |                    |
| 1        | VR-1.1   | Plieniniai vertikalūs ryšiai |       | vnt.      | 4      | 170.03           | 680.12  |                |                    |
| 2        |          | Ø101.6x6, S355, L=4700       |       | kg        | 1      | 66.27            | 66.27   |                |                    |
| 3        |          | Ø88.9x5, S355, L=2525        |       | kg        | 2      | 26.01            | 52.02   |                |                    |
| 4        |          | Ø88.9x5, S355, L=1212        |       | kg        | 2      | 12.49            | 24.98   |                |                    |
| 5        |          | Ø88.9x5, S355, L=1299        |       | kg        | 2      | 13.38            | 26.76   |                |                    |
|          |          |                              |       |           |        | Viso plieno, kg: |         | 680.12         |                    |

GELŽBETONINIŲ PIRMO AUKŠTO KOLONŲ MONOLITINIMO SĄNAUDŲ KIEKIŲ ŽINIARAŠTIS

| Eil. Nr. | Pozicija | Pavadinimas                      | Žymuo | Mato vnt. | Kiekis | Sąnaudos                                   |         | Svoris vnt., t | Papildomi duomenys |
|----------|----------|----------------------------------|-------|-----------|--------|--------------------------------------------|---------|----------------|--------------------|
|          |          |                                  |       |           |        | Vien.                                      | Iš viso |                |                    |
| 1        | K-1.1    | Kolona 300x300x4090              |       |           |        |                                            |         |                |                    |
| 2        |          | Nesitraukiantis skiedinys C30/37 |       | m³        | 4      | 0.019                                      | 0.074   |                |                    |
| 3        | K-1.2    | Kolona 300x300x4090              |       |           |        |                                            |         |                |                    |
| 4        |          | Nesitraukiantis skiedinys C30/37 |       | m³        | 12     | 0.019                                      | 0.222   |                |                    |
| 5        | K-1.3    | Kolona 300x300x4090              |       |           |        |                                            |         |                |                    |
| 6        |          | Nesitraukiantis skiedinys C30/37 |       | m³        | 4      | 0.019                                      | 0.074   |                |                    |
| 7        | K-1.4    | Kolona 300x300x4090              |       |           |        |                                            |         |                |                    |
| 8        |          | Nesitraukiantis skiedinys C30/37 |       | m³        | 4      | 0.019                                      | 0.074   |                |                    |
|          |          |                                  |       |           |        | Viso nesitraukiančio skiedinio C30/37, m³: |         | 0.444          |                    |

MONOLITINIŲ LAIPTINIŲ/LIFTO ŠACHTŲ/STANDUMO SIENŲ SĄNAUDŲ KIEKIŲ ŽINIARAŠTIS

| Eil. Nr. | Pozicija | Pavadinimas                     | Žymuo | Mato vnt. | Kiekis | Sąnaudos                         |         | Svoris vnt., t | Papildomi duomenys |
|----------|----------|---------------------------------|-------|-----------|--------|----------------------------------|---------|----------------|--------------------|
|          |          |                                 |       |           |        | Vien.                            | Iš viso |                |                    |
| 1        |          | Laiptinės/lifto standumo sienos |       |           |        |                                  |         |                |                    |
| 2        |          | Betonas C30/37 X0               |       | m³        | 1      | -                                | 91.700  |                |                    |
| 3        |          | Armatūra S500                   |       | kg        | 1      | -                                | 9170.0  |                |                    |
| 4        |          | Įdėtinų detalių plienas S355    |       | kg        | 1      | -                                | 3000.0  |                |                    |
| 5        |          | Standumo bloko perdangos        |       |           |        |                                  |         |                |                    |
| 6        |          | Betonas C30/37 X0               |       | m³        | 1      | -                                | 4.400   |                |                    |
| 7        |          | Armatūra S500                   |       | kg        | 1      | -                                | 440.00  |                |                    |
| 8        |          | Laiptai ir laiptų aikštelės     |       |           |        |                                  |         |                |                    |
| 9        |          | Betonas C30/37 X0               |       | m³        | 1      | -                                | 10.400  |                |                    |
| 10       |          | Armatūra S500                   |       | kg        | 1      | -                                | 1040.0  |                |                    |
|          |          |                                 |       |           |        | Viso betono, m³:                 |         | 106.50         |                    |
|          |          |                                 |       |           |        | Viso armatūros, kg:              |         | 10650          |                    |
|          |          |                                 |       |           |        | Viso įdėtinų detalių plieno, kg: |         | 3000.0         |                    |

|                            |                                                                                                                   |                                                                                                                                       |         |                       |                                                                                      |  |       |      |
|----------------------------|-------------------------------------------------------------------------------------------------------------------|---------------------------------------------------------------------------------------------------------------------------------------|---------|-----------------------|--------------------------------------------------------------------------------------|--|-------|------|
| KVAL.<br>PATV.<br>DOK. NR. |                                                                                                                   | UAB "Konstrukcijų pasaulis"                                                                                                           |         |                       | STATINIO PROJEKTO PAVADINIMAS                                                        |  |       |      |
|                            |                                                                                                                   | Jonavos g. 260, Kaunas<br>Įm. k.: 304690224<br>Tel. +370 (613) 98089<br>El.p.: k.pazereckas@gmail.com<br>www.konstrukciju-pasaulis.lt |         |                       | Negyvenamasis 5 aukštų surenkamo gelžbetonio konstrukcijų mokslo paskirties pastatas |  |       |      |
|                            |                                                                                                                   |                                                                                                                                       |         |                       |                                                                                      |  |       |      |
| 37603                      | PDV                                                                                                               | Kęstutis Pažereckas                                                                                                                   | 2018 08 | DOKUMENTO PAVADINIMAS |                                                                                      |  | LAIDA |      |
| 37603                      | Konstr.                                                                                                           | Kęstutis Pažereckas                                                                                                                   | 2018 08 | Pirmo aukšto planas   |                                                                                      |  | O     |      |
|                            |                                                                                                                   |                                                                                                                                       |         |                       |                                                                                      |  |       |      |
| LT                         | UŽSAKOVAS                                                                                                         |                                                                                                                                       |         | BRĖŽINIO ŽYMUO        |                                                                                      |  | LAPAS | LAPŲ |
|                            | Miškų institutas, Lietuvos agrarinių ir miškų mokslų centro filialas, Liepų g. 1, Girionių k., LT-53101, Kauno r. |                                                                                                                                       |         | KPRS18/02-TP-SK-3.7   |                                                                                      |  | 1     | 1    |
|                            |                                                                                                                   |                                                                                                                                       |         |                       |                                                                                      |  |       |      |

300

surenkama g/b kolona

4 vnt. kolonos "batai"  
Peikko HPKM20/HPKM24

Nesitraukiantis betono skiedinys  
ne žemesnės kaip C30/37  
ir kolonos betono klasės

50

50

85

65

50

A

A

pamato viršaus alt.

pamatas

200

4 vnt. inkariniai varžtai  
Peikko HPM20L/HPM24L/HPM30L

Technical drawing of a square plate with a side length of 300. The plate features four circular holes, each with a diameter of 50, located at the corners. The distance from the center of each hole to the nearest edge is 50. A central cross pattern is formed by four lines intersecting at the center, with a width of 100 for each arm. The drawing includes dimension lines and numerical values indicating the geometry and spacing.

|                            |                                                                                                                                   |         |                                                                                                                                                                             |                                       |                                                                                                                          |       |       |
|----------------------------|-----------------------------------------------------------------------------------------------------------------------------------|---------|-----------------------------------------------------------------------------------------------------------------------------------------------------------------------------|---------------------------------------|--------------------------------------------------------------------------------------------------------------------------|-------|-------|
| KVAL.<br>PATV.<br>DOK. NR. |                                              |         | <b>UAB "Konstrukcijų pasaulis"</b><br>Jonavos g. 260, Kaunas<br>Įm. k.: 304690224<br>Tel. +370 (613) 98089<br>El.p.: k.pazereckas@gmail.com<br>www.konstrukciju-pasaulis.lt |                                       | STATINIO PROJEKTO PAVADINIMAS<br>Negyvenamasis 5 aukštų surenkamo gelžbetonio konstrukcijų<br>mokslo paskirties pastatas |       |       |
|                            | 37603                                                                                                                             | PDV     | Kęstutis Pažereckas                                                                                                                                                         | 2018 08                               | DOKUMENTO PAVADINIMAS                                                                                                    |       | LAIDA |
|                            | 37603                                                                                                                             | Konstr. | Kęstutis Pažereckas                                                                                                                                                         | 2018 08                               | Kolonų ir pamato principinis jungimo mazgas                                                                              |       | O     |
|                            |                                                                                                                                   |         |                                                                                                                                                                             |                                       |                                                                                                                          |       |       |
| LT                         | UŽSAKOVAS<br>Miškų institutas, Lietuvos agrarinių ir miškų mokslų<br>centro filialas, Liepų g. 1, Girionių k., LT-53101, Kauno r. |         |                                                                                                                                                                             | BRĖŽINIO ŽYMUO<br>KPRS18/02-TP-SK-3.8 |                                                                                                                          | LAPAS | LAPŲ  |
|                            |                                                                                                                                   |         |                                                                                                                                                                             |                                       |                                                                                                                          | 1     | 1     |

PIRMO / ANTRO / TREČIO / KETVIRTO AUKŠTŲ PERDANGŲ RYGELIŲ PLANAS MASTELIS 1:100

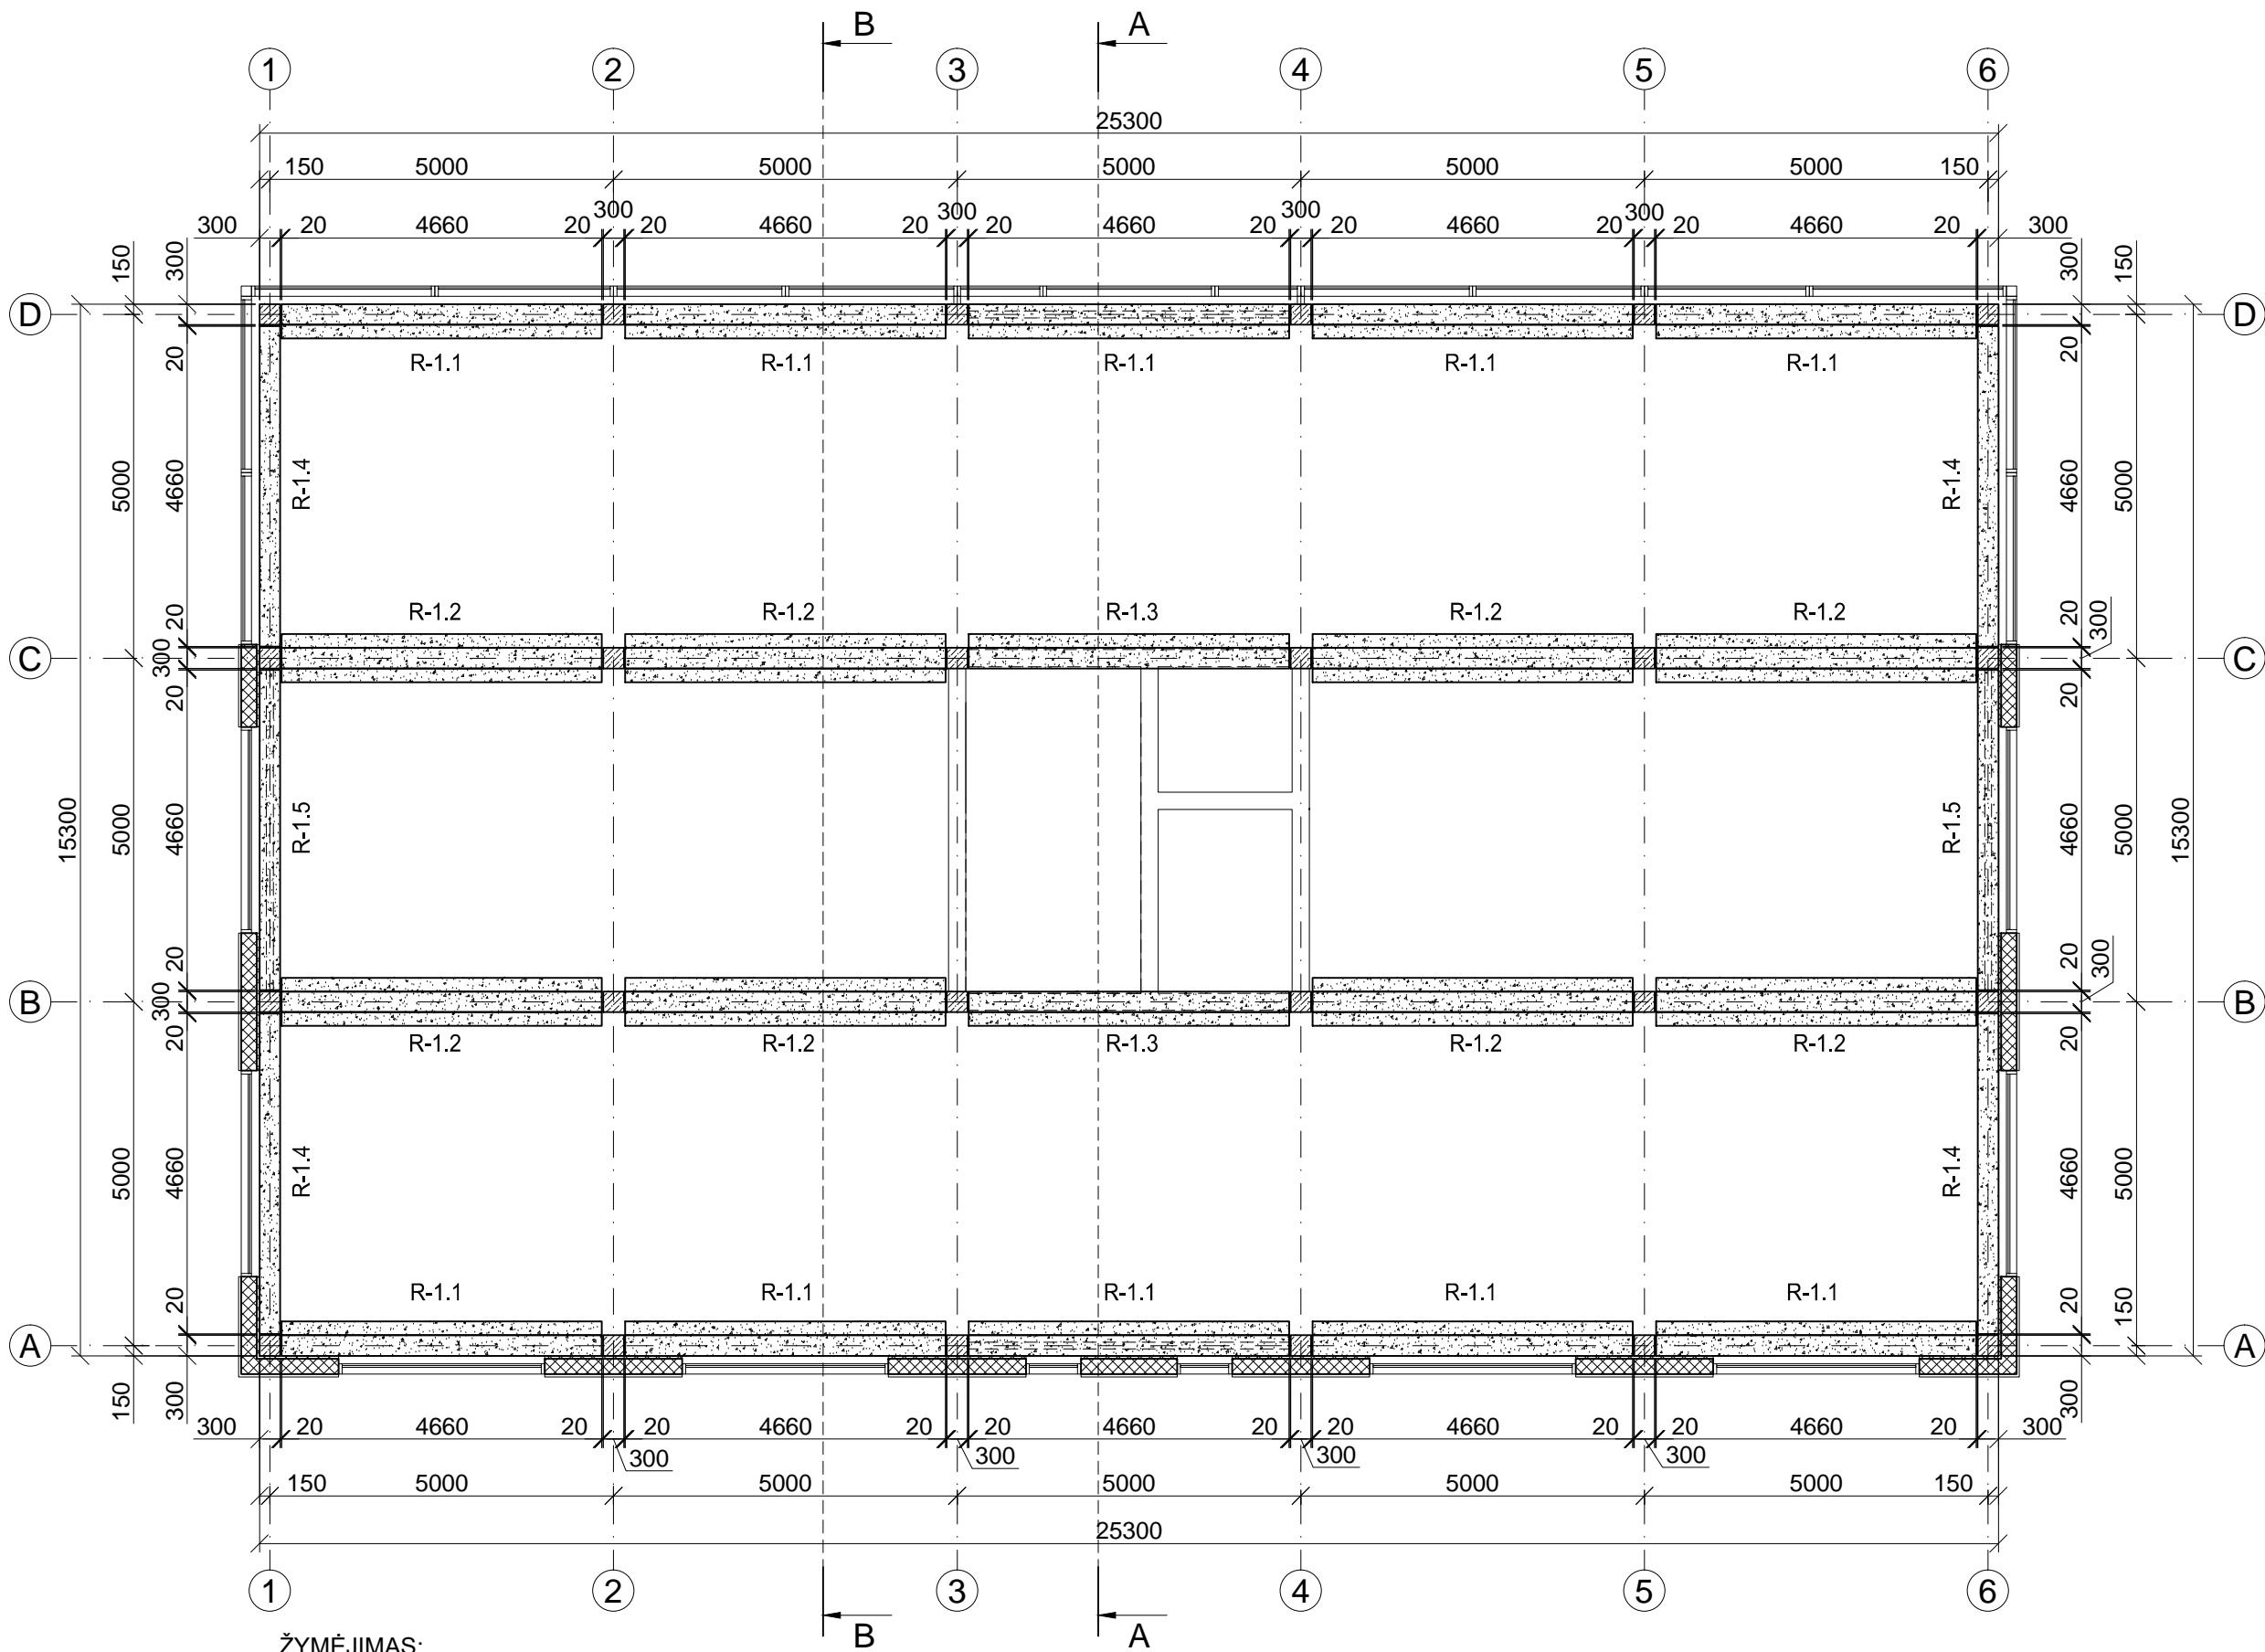

ŽYMĖJIMAS:  
R-... - Gelžbetoninis rygelis;

RYGELIŲ IR KRAŠTINIŲ VIRŠUTINIŲ KOLONŲ JUNGIMO MAZGAS M 1:10

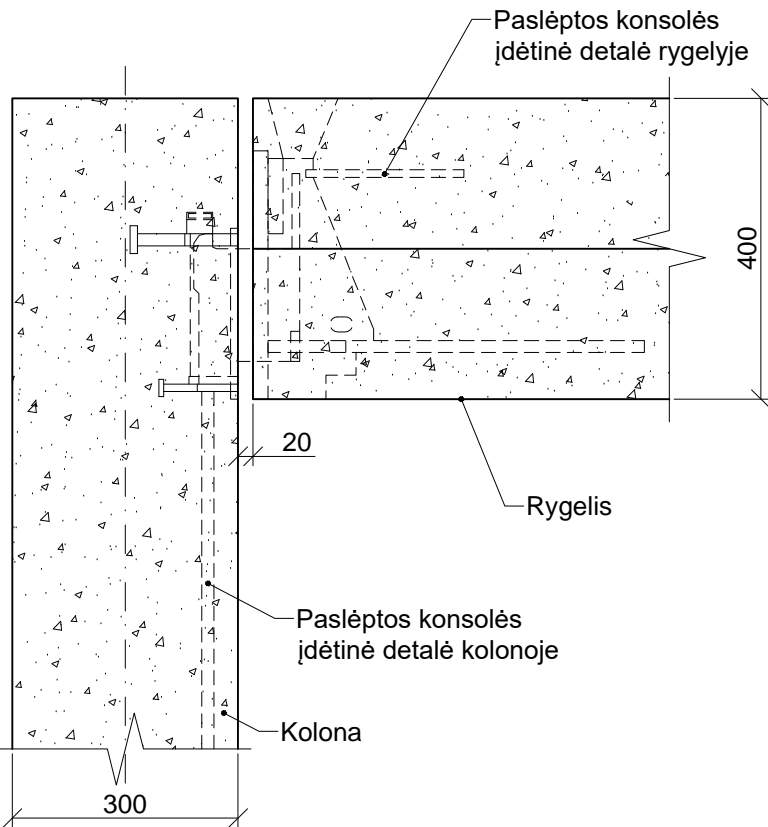

- PASTABOS:
- Surenkamų g/b rygelių montavimui ant kolonų naudojamos paslėptos plieninės jungtys.
  - Surenkamų g/b rygelių įdėtinės detalės projektuojamos darbo projekto stadijoje.
  - Gelžbetoniniams rygeliams naudojamas C30/37,X0 stiprumo klasės betonas, pagal LST EN 206-1:2002.
  - Gelžbetoniniai rygeliai armuojami S500 stiprumo klasės armatūros strypynais, pagal LST EN ISO 15630-1:2010. Gelžbetoninių rygelių išilginė armatūra sujungiama užleidimu, praeičiant ne mažiau 40-d (d - didesnio iš jungiamų strypų skersmuo).
  - Gelžbetonio rygelių atsparumas ugniai R60 min.
  - Monolitinėms laiptinių ir lifto šachtų standumo sienoms naudojamas C30/37 X0 klasės betonas, pagal LST EN 206-1:2002.
  - Monolitiniai elementai armuojami S500 stiprumo klasės armatūros tinklais ir/ar strypynais, pagal LST EN ISO 15630-1:2010.
  - Darbai vykdomi pagal darbo projektą.

SUMINIS GELŽBETONINIŲ PIRMO - KETVIRTO AUKŠTŲ RYGELIŲ SAŪAUDŲ KIEKIŲ ŽINIARAŠTIS

| Eil. Nr.                         | Pozicija | Pavadinimas                  | Žymuo | Mato vnt. | Kiekis | Sąnaudos Vien. | Iš viso | Svoris vnt., t | Papildomi duomenys |
|----------------------------------|----------|------------------------------|-------|-----------|--------|----------------|---------|----------------|--------------------|
| 1                                | R-x.1    | Rygelis L500x400x4660        |       |           |        |                |         |                |                    |
| 2                                |          | Betonas C30/37 X0            |       | m³        | 40     | 0.746          | 29.840  |                |                    |
| 3                                |          | Armatūra S500                |       | kg        | 40     | 89.52          | 3580.8  |                |                    |
| 4                                |          | Įdėtinų detalių plienas S355 |       | kg        | 40     | 50             | 2000.0  |                |                    |
| 5                                | R-x.2    | Rygelis T700x400x4660        |       |           |        |                |         |                |                    |
| 6                                |          | Betonas C30/37 X0            |       | m³        | 32     | 0.932          | 29.824  |                |                    |
| 7                                |          | Armatūra S500                |       | kg        | 32     | 111.84         | 3578.9  |                |                    |
| 8                                |          | Įdėtinų detalių plienas S355 |       | kg        | 32     | 50             | 1600.0  |                |                    |
| 9                                | R-x.3    | Rygelis L500x400x4660        |       |           |        |                |         |                |                    |
| 10                               |          | Betonas C30/37 X0            |       | m³        | 8      | 0.746          | 5.968   |                |                    |
| 11                               |          | Armatūra S500                |       | kg        | 8      | 89.52          | 716.2   |                |                    |
| 12                               |          | Įdėtinų detalių plienas S355 |       | kg        | 8      | 50             | 400.0   |                |                    |
| 13                               | R-x.4    | Rygelis 300x400x4660         |       |           |        |                |         |                |                    |
| 14                               |          | Betonas C30/37 X0            |       | m³        | 16     | 0.559          | 8.944   |                |                    |
| 15                               |          | Armatūra S500                |       | kg        | 16     | 67.08          | 1073.3  |                |                    |
| 16                               |          | Įdėtinų detalių plienas S355 |       | kg        | 16     | 40             | 640.0   |                |                    |
| 17                               | R-x.5    | Rygelis 300x400x4660         |       |           |        |                |         |                |                    |
| 18                               |          | Betonas C30/37 X0            |       | m³        | 8      | 0.559          | 4.472   |                |                    |
| 19                               |          | Armatūra S500                |       | kg        | 8      | 67.08          | 536.7   |                |                    |
| 20                               |          | Įdėtinų detalių plienas S355 |       | kg        | 8      | 50             | 400.0   |                |                    |
| Viso betono, m³:                 |          |                              |       |           |        |                | 79.048  |                |                    |
| Viso armatūros, kg:              |          |                              |       |           |        |                | 9485.9  |                |                    |
| Viso įdėtinų detalių plieno, kg: |          |                              |       |           |        |                | 5040.0  |                |                    |

RYGELIŲ IR VIDURINIŲ KOLONŲ JUNGIMO MAZGAS M 1:10

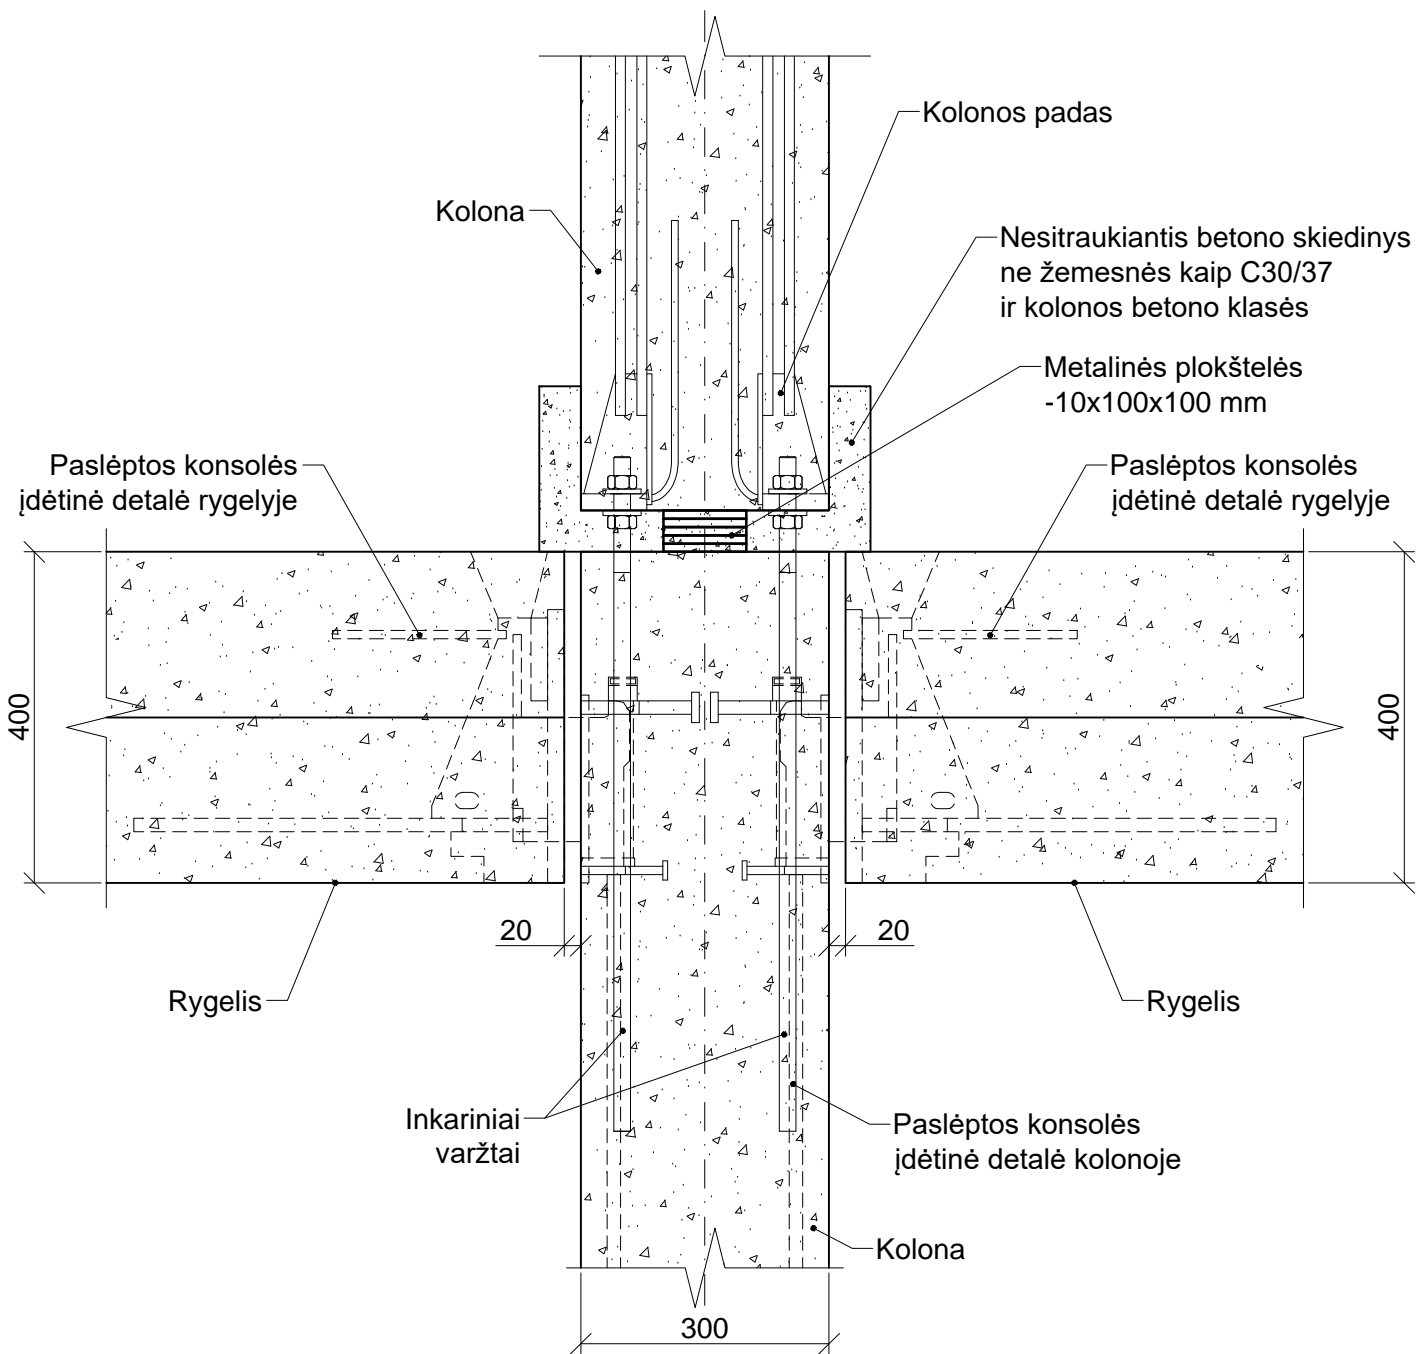

|                            |                                                                                                                                |                                                                                                                                                                    |         |                                                                                                                       |   |       |
|----------------------------|--------------------------------------------------------------------------------------------------------------------------------|--------------------------------------------------------------------------------------------------------------------------------------------------------------------|---------|-----------------------------------------------------------------------------------------------------------------------|---|-------|
| KVAL.<br>PATV.<br>DOK. NR. |                                           | UAB "Konstrukcijų pasaulis"<br>Jonas g. 260, Kaunas<br>Įm. k.: 304690224<br>Tel. +370 (613) 98089<br>El.p.: k.pazereckas@gmail.com<br>www.konstrukciju-pasaulis.lt |         | STATINIO PROJEKTO PAVADINIMAS<br>Negyvenamasis 5 aukštų surenkamo gelžbetonio konstrukcijų mokslo paskirties pastatas |   |       |
| 37603                      | PDV                                                                                                                            | Kęstutis Pažereckas                                                                                                                                                | 2018 08 | DOKUMENTO PAVADINIMAS<br>Pirmo/antro/trečio/ketvirto aukštų perdangų rygielių planas                                  |   | LAIDA |
| 37603                      | Konstr.                                                                                                                        | Kęstutis Pažereckas                                                                                                                                                | 2018 08 |                                                                                                                       |   | O     |
|                            |                                                                                                                                |                                                                                                                                                                    |         |                                                                                                                       |   |       |
| LT                         | UŽSAKOVAS<br>Miškų institutas, Lietuvos agrarinių ir miškų mokslų centro filialas, Liepų g. 1, Girionių k., LT-53101, Kauno r. |                                                                                                                                                                    |         | BRĖŽINIO ŽYMUO<br>KPRS18/02-TP-SK-3.9                                                                                 |   | LAPAS |
|                            |                                                                                                                                |                                                                                                                                                                    |         |                                                                                                                       |   | LAPŲ  |
|                            |                                                                                                                                |                                                                                                                                                                    |         |                                                                                                                       | 1 | 1     |



PIRMO / ANTRO / TREČIO / KETVIRTO AUKŠTŲ PERDANGŲ PLANAS MASTELIS 1:100

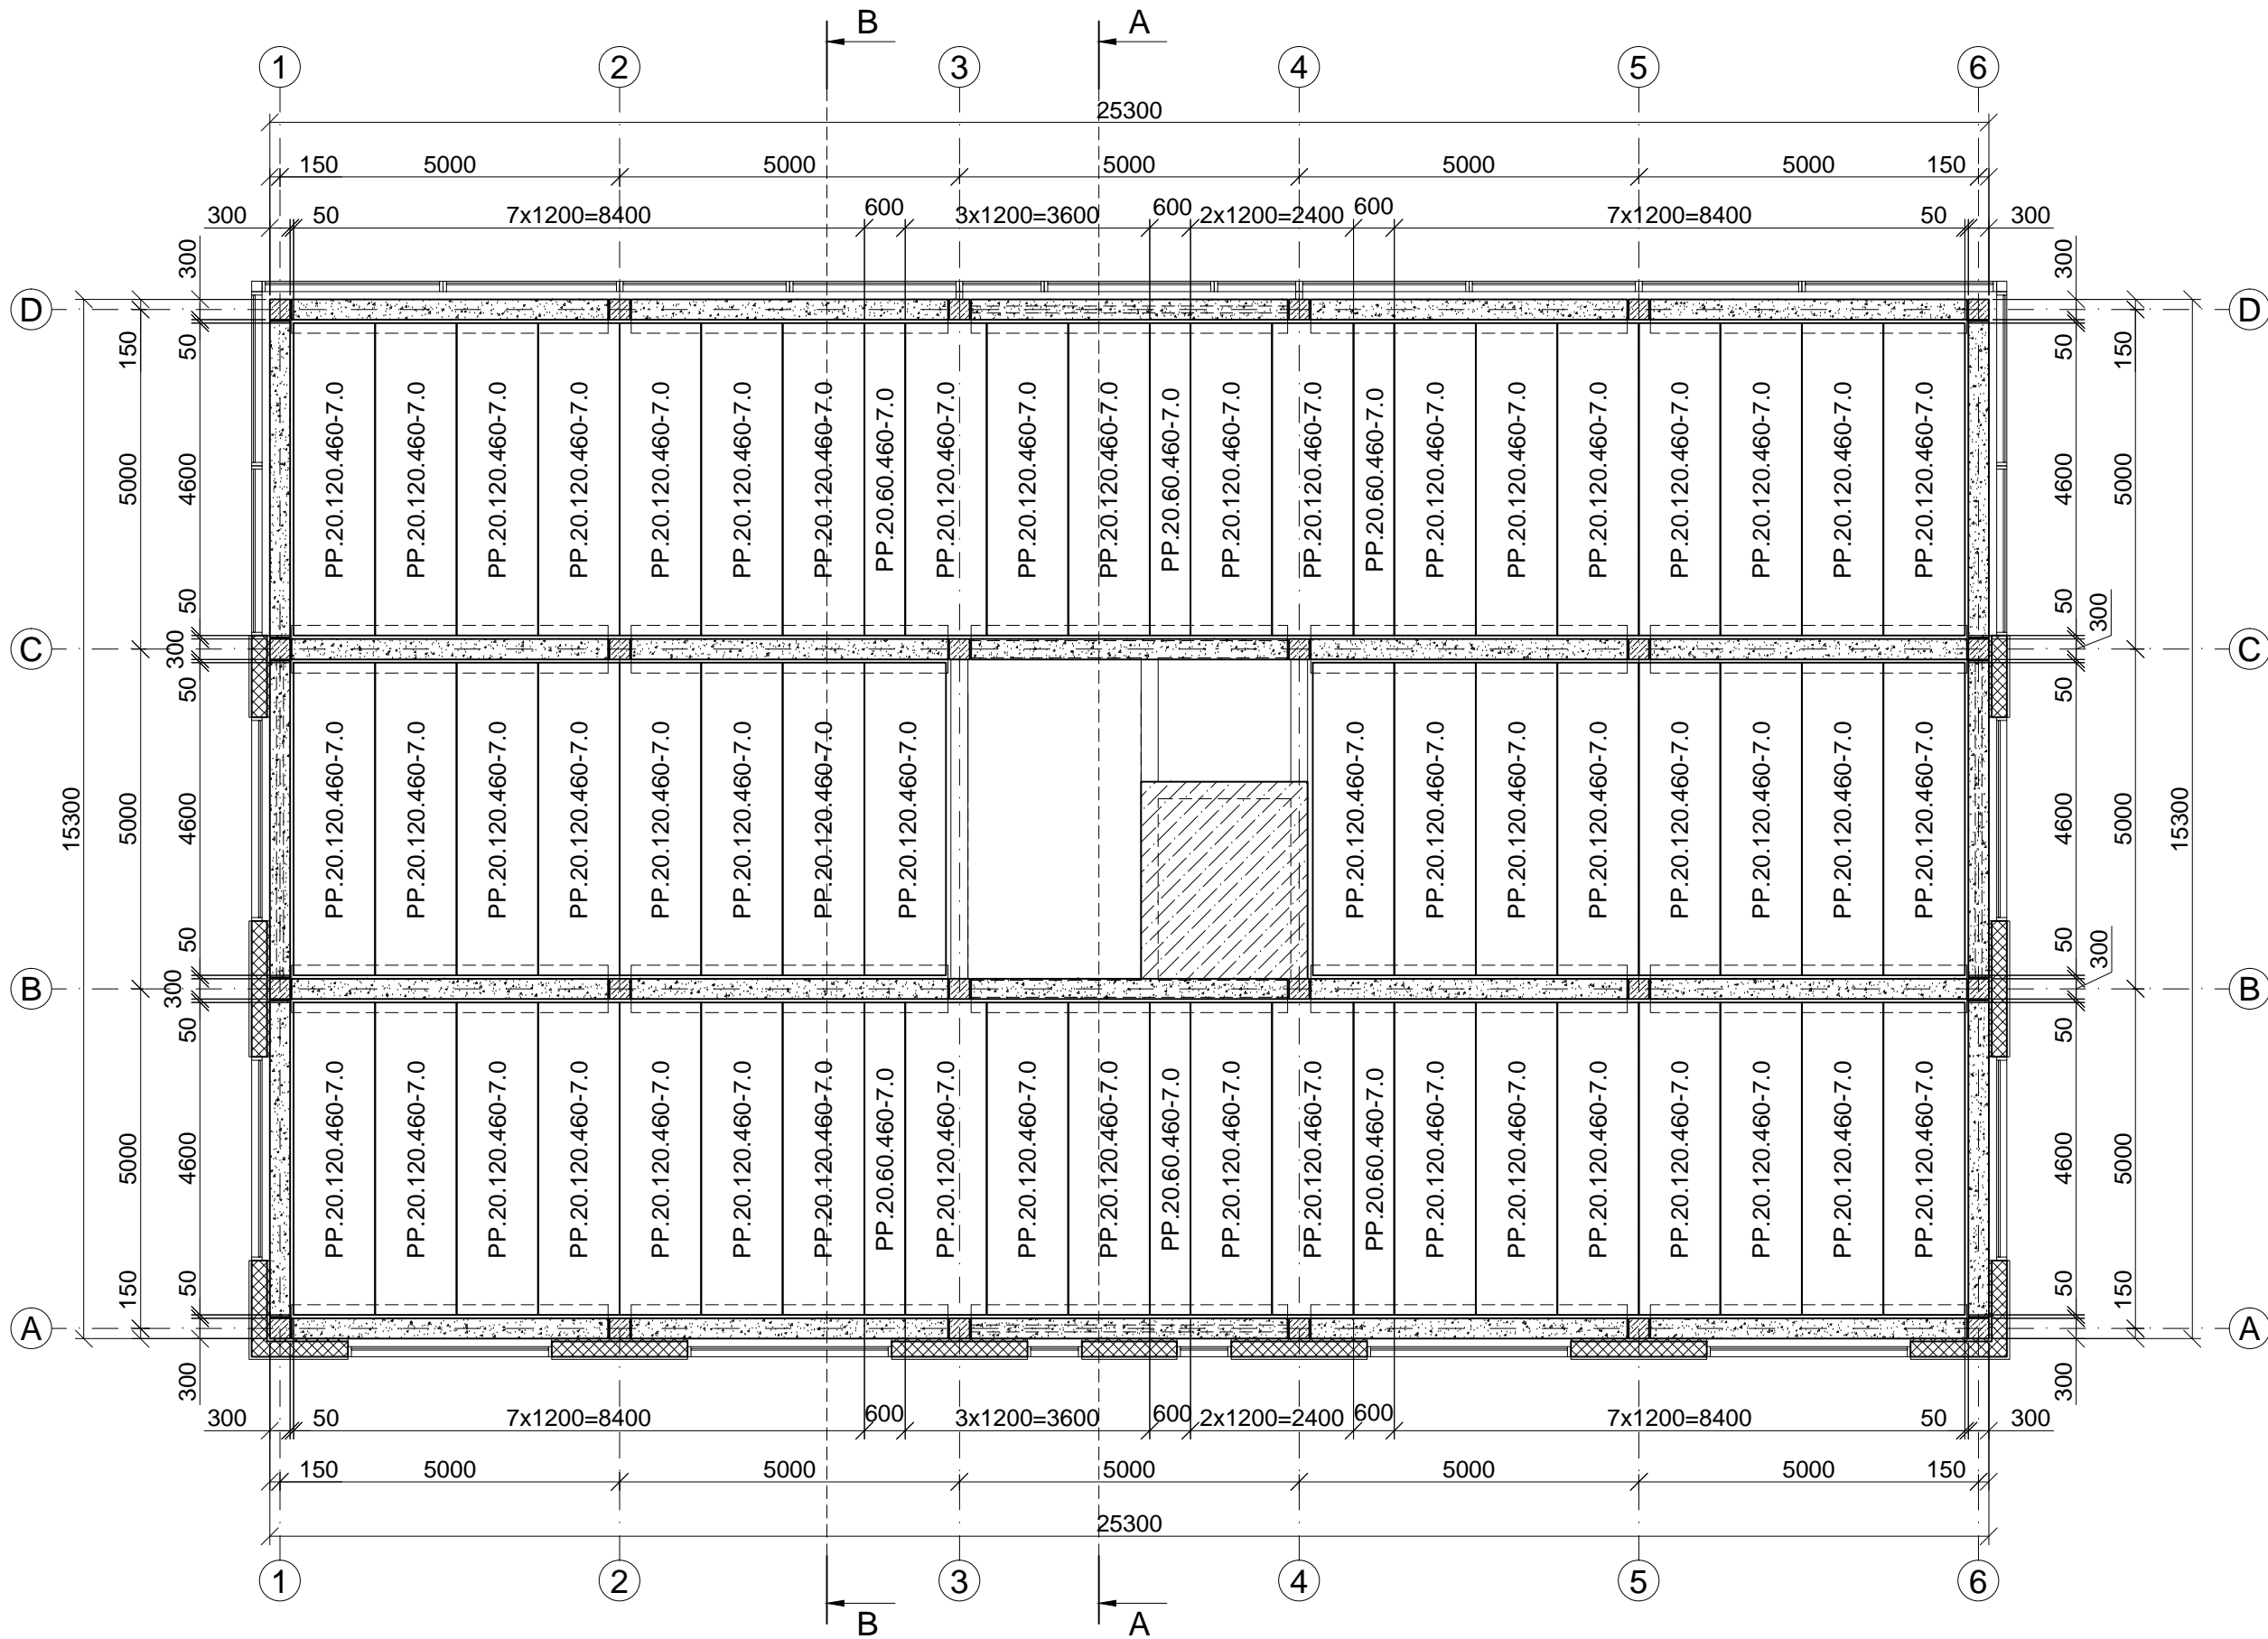

ŽYMĖJIMAS:

PP - surenkama kiaurymėta perdangos plokštė

PP.20.120-460-7.0:

20 - storis, cm

120 - plotis, cm

460 - ilgis, cm

7.0 - skaičiuojamoji apkrova ant plokštės,

7.0 - skaičiuojamoji apkrova ant plokštės,

KIAURYMĖTOSIOS DENGINIO PLOKŠTĖS ATRĖIMAS

ANT T FORMOS SKERSPJŪVIO RYGELIO M 1:10

principinis mazgas

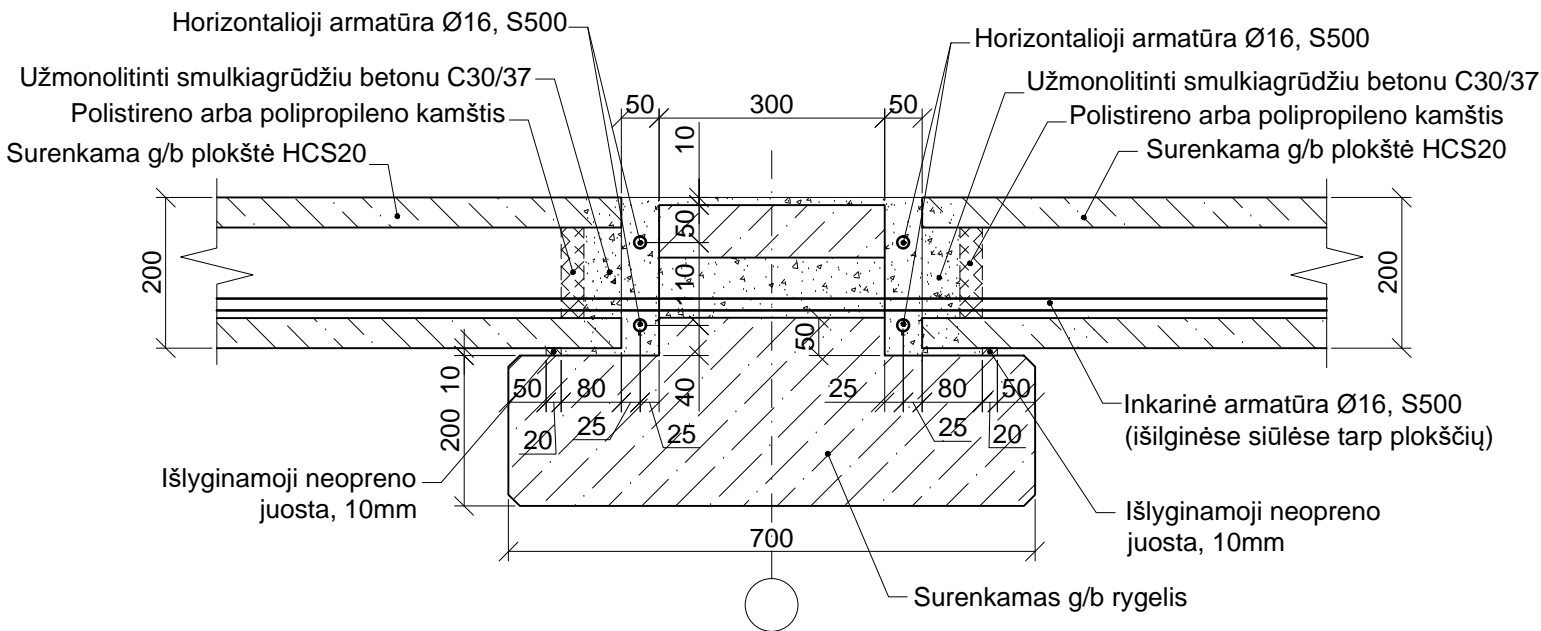

KIAURYMĖTOSIOS DENGINIO PLOKŠTĖS ATRĖIMAS

ANT L FORMOS SKERSPJŪVIO RYGELIO M 1:10

principinis mazgas

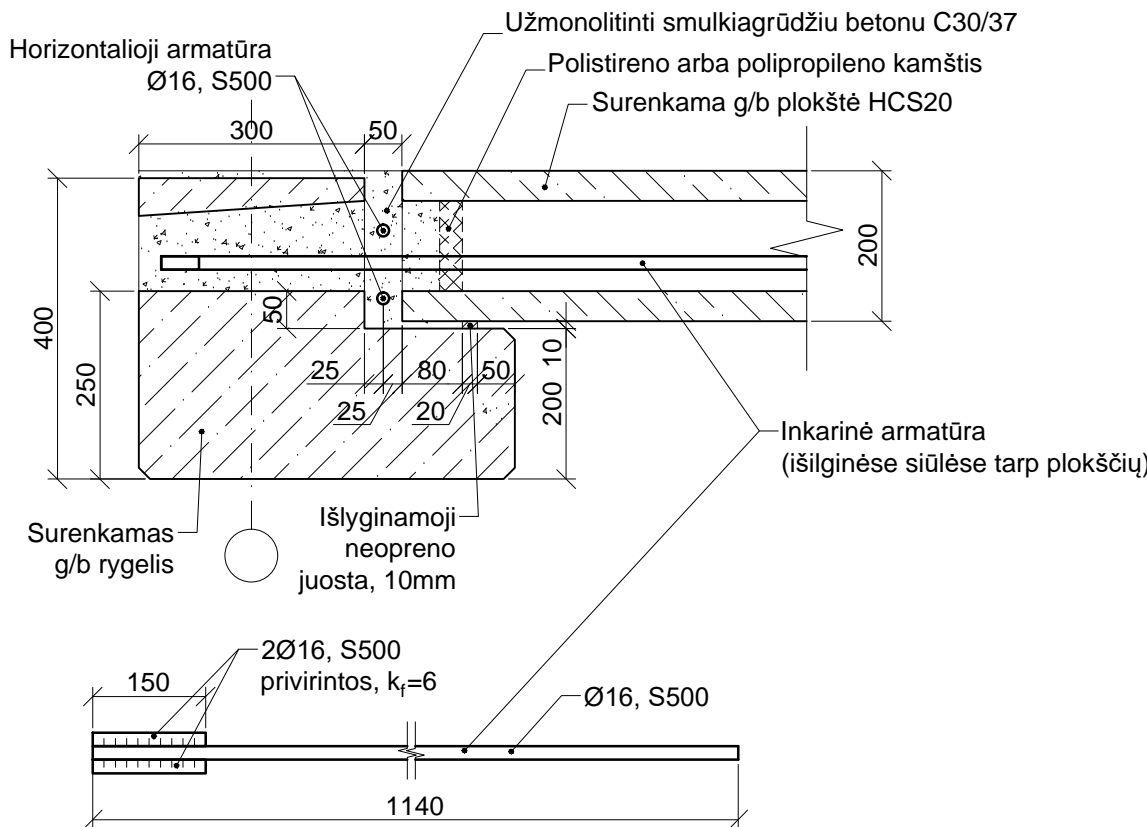

SUMINIS SURENKAMŲ GELŽBETONINIŲ PIRMO - KETVIRTO AUKŠTŲ PERDANGOS PLOKŠČIŲ IR JŲ MONOLITINIMO SĄNAUDŲ KIEKIŲ ŽINIARAŠTIS

| Eil. Nr. | Pozicija | Pavadinimas          | Žymuo | Mato vnt. | Kiekis | Sąnaudos            |         | Svoris vnt., t | Papildomi duomenys |
|----------|----------|----------------------|-------|-----------|--------|---------------------|---------|----------------|--------------------|
|          |          |                      |       |           |        | Vien.               | Iš viso |                |                    |
| 1        |          | PP.20.120.460-7.0    |       | vnt.      | 216    |                     |         | 1.750          | 378 t (viso)       |
| 2        |          | Betonas C30/37 X0    |       | m³        | 216    | 0.700               | 151.20  |                |                    |
| 3        |          | Armatura A800        |       | kg        | 216    | 35.00               | 7560.0  |                |                    |
| 4        |          | PP.20.60.460-7.0     |       | vnt.      | 24     |                     |         | 0.875          | 21 t (viso)        |
| 5        |          | Betonas C30/37 X0    |       | m³        | 24     | 0.350               | 8.400   |                |                    |
| 6        |          | Armatura A800        |       | kg        | 24     | 17.50               | 420.0   |                |                    |
| 7        |          | Plokščių monolitinis |       |           |        |                     |         |                |                    |
| 8        |          | Betonas C30/37 X0    |       | m³        | -      | -                   | 18.000  |                |                    |
| 9        |          | Armatura S500        |       | kg        | -      | -                   | 1800.0  |                |                    |
|          |          |                      |       |           |        | Viso betono, m³:    |         | 177.60         |                    |
|          |          |                      |       |           |        | Viso armatūros, kg: |         | 9780.0         |                    |

SUMINIS PIRMO - KETVIRTO AUKŠTŲ PERDANGOS MONOLITINIO IŠLYGINAMOJO SLUOKSNIO SĄNAUDŲ KIEKIŲ ŽINIARAŠTIS

| Eil. Nr. | Pozicija | Pavadinimas                  | Žymuo | Mato vnt. | Kiekis | Sąnaudos            |         | Svoris vnt., t | Papildomi duomenys |
|----------|----------|------------------------------|-------|-----------|--------|---------------------|---------|----------------|--------------------|
|          |          |                              |       |           |        | Vien.               | Iš viso |                |                    |
| 1        |          | Išlyginamasis sluoksnis 60mm |       | m²        | 4      | 360.0               | 1440.0  |                |                    |
| 2        |          | Betonas C25/30 X0            |       | m³        | 4      | 21.600              | 86.400  |                |                    |
| 3        |          | Armatura S500                |       | kg        | 4      | 530.0               | 2120.0  |                |                    |
|          |          |                              |       |           |        | Viso betono, m³:    |         | 86.400         |                    |
|          |          |                              |       |           |        | Viso armatūros, kg: |         | 2120.0         |                    |

PASTABOS:

- Surenkamos g/b plokštės ir monolitinės perdangos ant rygių atremiamos ne mažiau kaip 150 mm.
- Visos perdangos plokštės inkaruojamos tarpusavyje, monolitiniuose ruožuose ir rygiuose.
- Tarpai tarp plokščių užtaisomi C30/37 klasės betonu.
- Monolitinėms perdangoms naudojamas C30/37 stiprumo klasės betonas, pagal LST EN 206-1:2002. Perdangos armuojamos S500 stiprumo klasės armatūros tinklais ir strypynais, pagal LST EN ISO 15630-1:2003.
- Surenkamos perdangos plokštės atitinka UAB "Betonika" gaminių sortimentą (gali būti pakeistos analogiškų parametrų plokštėmis).
- Perdangos atsparumas ugniai REI 60 min.

|                            |                                                                                                                   |                                                                                                                                       |         |                                                                                      |  |       |
|----------------------------|-------------------------------------------------------------------------------------------------------------------|---------------------------------------------------------------------------------------------------------------------------------------|---------|--------------------------------------------------------------------------------------|--|-------|
| KVAL.<br>PATV.<br>DOK. NR. |                              | UAB "Konstrukcijų pasaulis"                                                                                                           |         | STATINIO PROJEKTO PAVADINIMAS                                                        |  |       |
|                            |                                                                                                                   | Jonavos g. 260, Kaunas<br>Įm. k.: 304690224<br>Tel. +370 (613) 98089<br>El.p.: k.pazereckas@gmail.com<br>www.konstrukciju-pasaulis.lt |         | Negyvenamasis 5 aukštų surenkamo gelžbetonio konstrukcijų mokslo paskirties pastatas |  |       |
|                            |                                                                                                                   |                                                                                                                                       |         |                                                                                      |  |       |
| 37603                      | PDV                                                                                                               | Kęstutis Pažereckas                                                                                                                   | 2018 08 | DOKUMENTO PAVADINIMAS                                                                |  | LAIDA |
| 37603                      | Konstr.                                                                                                           | Kęstutis Pažereckas                                                                                                                   | 2018 08 | Pirmo/antro/trečio/ketvirto aukštų perdangų planas                                   |  | O     |
|                            |                                                                                                                   |                                                                                                                                       |         |                                                                                      |  |       |
| LT                         | UŽSAKOVAS                                                                                                         |                                                                                                                                       |         | BRĖŽINIO ŽYMUO                                                                       |  | LAPAS |
|                            | Miškų institutas, Lietuvos agrarinių ir miškų mokslų centro filialas, Liepų g. 1, Girionių k., LT-53101, Kauno r. |                                                                                                                                       |         | KPRS18/02-TP-SK-3.10                                                                 |  | LAPŲ  |
|                            |                                                                                                                   |                                                                                                                                       |         |                                                                                      |  | 1     |
|                            |                                                                                                                   |                                                                                                                                       |         |                                                                                      |  | 1     |



ANTRO / TREČIO / KETVIRTO / PENKTO AUKŠTŲ PLANAS MASTELIS 1:100

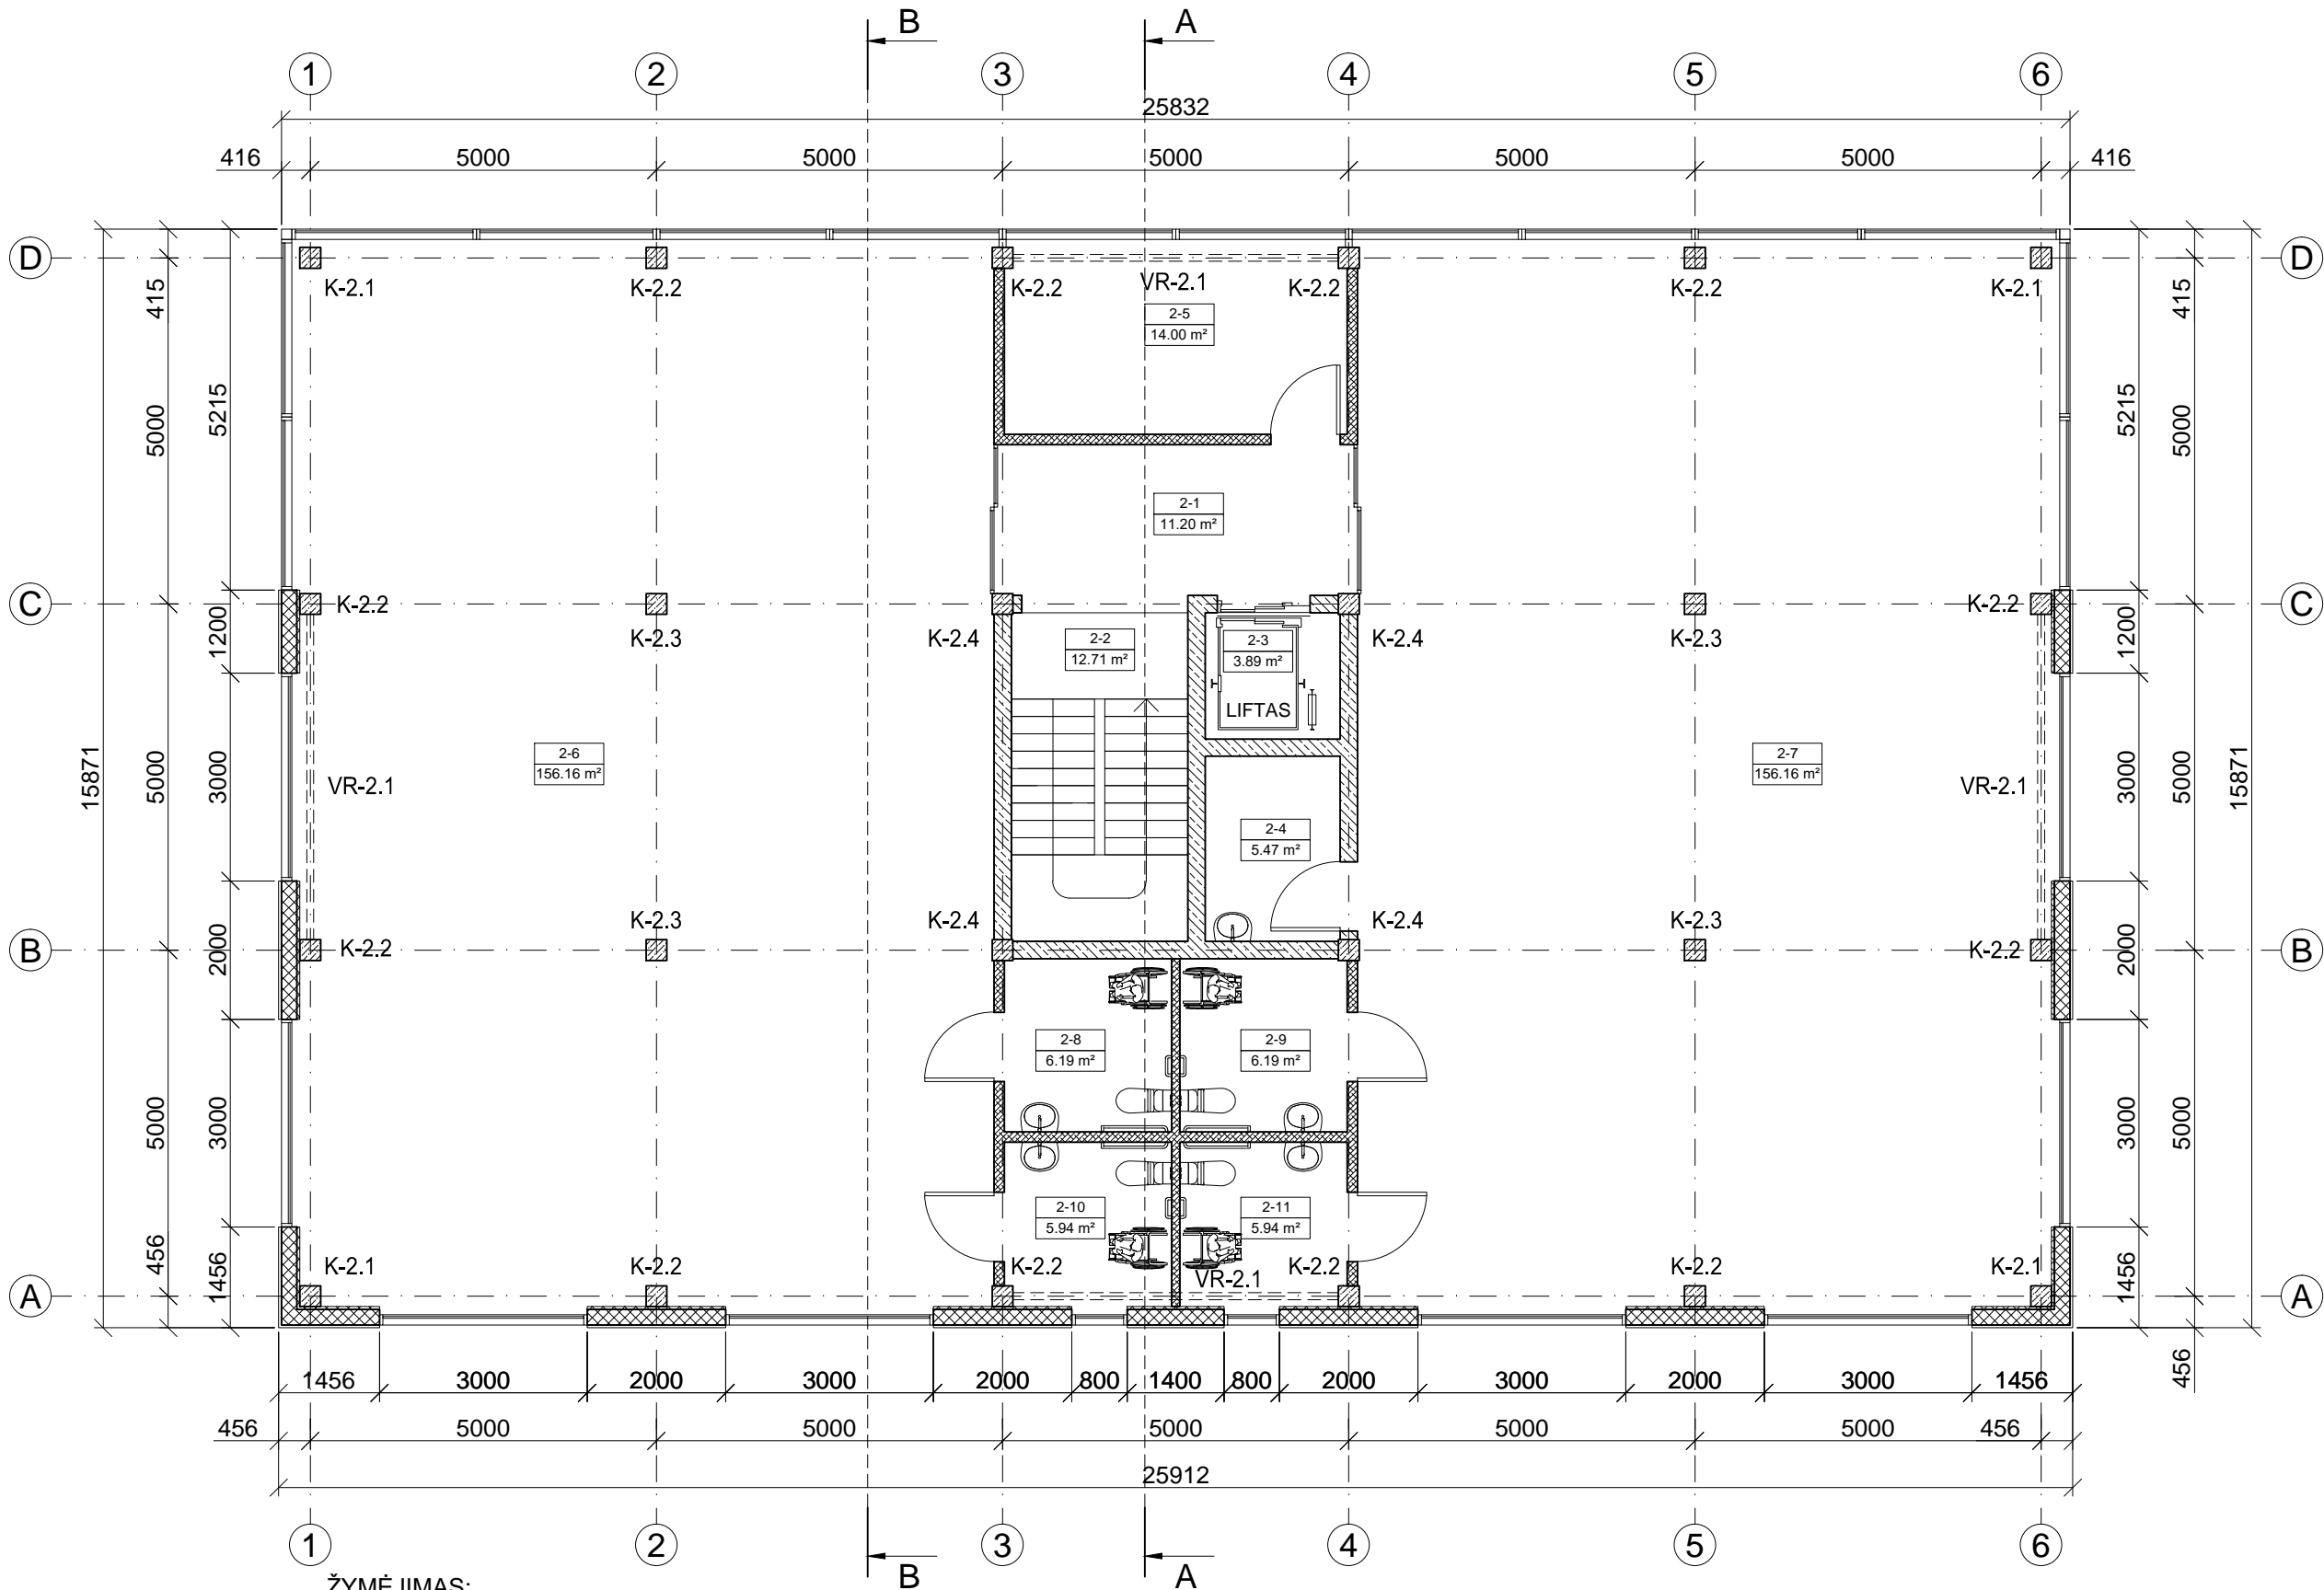

ŽYMĖJIMAS:  
K-... - Gelžbetoninė surenkama kolona;  
VR-... - Plieniniai vertikalieji ryšiai;

| Patalpų eksplikacija |                  |           |
|----------------------|------------------|-----------|
| Numeris              | Patalpa          | Plotas    |
| 2-1                  | Fojė             | 11.20 m²  |
| 2-2                  | Laiptinė         | 12.71 m²  |
| 2-3                  | Lifto šachta     | 3.89 m²   |
| 2-4                  | Tech. patalpa    | 5.47 m²   |
| 2-5                  | Tech. patalpa    | 14.00 m²  |
| 2-6                  | Ištaigų patalpos | 156.16 m² |
| 2-7                  | Ištaigų patalpos | 156.16 m² |
| 2-8                  | San. mazgas      | 6.19 m²   |
| 2-9                  | San. mazgas      | 6.19 m²   |
| 2-10                 | San. mazgas      | 5.94 m²   |
| 2-11                 | San. mazgas      | 5.94 m²   |
| Viso aukšte:         |                  | 383.85 m² |
| Viso pastate:        |                  | 768.01 m² |

PASTABOS:

- Surenkamų g/b kolonų tarpusavio sujungimams naudojami inkariniai varžtai ir kolonų padai.
- Surenkamų g/b kolonų įdėtinės detalės projektuojamos darbo projekto studijoje.
- Gelžbetoninėms kolonoms naudojamas C30/37, F150, XC1 stiprumo klasės betonas, pagal LST EN 206-1:2002.
- Gelžbetoninės kolonos armuojamos S500 stiprumo klasės armatūros strypynais, pagal LST EN ISO 15630-1:2010. Gelžbetoninių kolonų išilginė armatūra sujungiama užleidimu, prakeičiant ne mažiau 40° d (d - didesnio iš jungiamųjų strypų skersmuo).
- Gelžbetonio kolonų atsparumas ugniai R60 min.
- Monolitinėms laiptinių ir lifto šachtų standumo sienoms naudojamas C30/37 X0 klasės betonas, pagal LST EN 206-1:2002.
- Monolitiniai elementai armuojami S500 stiprumo klasės armatūros tinklais ir/ar strypynais, pagal LST EN ISO 15630-1:2010.
- Metalinėms konstrukcijoms ir elementams naudojamas S355 stiprumo klasės plienas.
- Suvirinimo jungčių briaunų paruošimas turi būti atliekamas pagal EN ISO 9692-1.
- Metaliniai elementai tarpusavyje suvirinami, siūlės aukštis 1,2-kf - plonesniojo iš jungiamųjų elementų storis (jei nenurodyta kitaip), pagal LST EN ISO 9692-1:2004.
- Konstrukcijų suvirinimui naudojamos suvirinimo medžiagos užtikrinančios suvirinimo siūlės skaičiuojamuosius stiprius ne mažesnius nei suvirinamo metalo.
- Metaliniai paviršiai gruntuojami ir dažomi, pagal LST EN ISO 12944-2:2000.
- Skylės varžtams daromos 2 mm didesnės nei varžto diameteras (jei brėžinyje nenurodyta kitaip).
- Darbai vykdomi pagal darbo projektą.

GELŽBETONINIŲ PENKTO AUKŠTO KOLONŲ SAŃAUDŲ KIEKIŲ ŽINIARAŠTIS

| Eil. Nr.                          | Pozicija | Pavadinimas                   | Žymuo | Mato vnt. | Kiekis | SaŃaudos |         | Svoris vnt., t | Papildomi duomenys |
|-----------------------------------|----------|-------------------------------|-------|-----------|--------|----------|---------|----------------|--------------------|
|                                   |          |                               |       |           |        | Vien.    | Iš viso |                |                    |
| 1                                 | K-5.1    | Kolona 300x300x3510           |       |           |        |          |         |                |                    |
| 2                                 |          | Betonas C30/37 X0             |       | m³        | 4      | 0.316    | 1.264   |                |                    |
| 3                                 |          | Armatūra S500                 |       | kg        | 4      | 31.60    | 126.40  |                |                    |
| 4                                 |          | Įdėtinių detalių plienas S355 |       | kg        | 4      | 60.00    | 240.00  |                |                    |
| 5                                 | K-5.2    | Kolona 300x300x3510           |       |           |        |          |         |                |                    |
| 6                                 |          | Betonas C30/37 X0             |       | m³        | 12     | 0.316    | 3.792   |                |                    |
| 7                                 |          | Armatūra S500                 |       | kg        | 12     | 31.60    | 379.20  |                |                    |
| 8                                 |          | Įdėtinių detalių plienas S355 |       | kg        | 12     | 60.00    | 720.00  |                |                    |
| 9                                 | K-5.3    | Kolona 300x300x3510           |       |           |        |          |         |                |                    |
| 10                                |          | Betonas C30/37 X0             |       | m³        | 4      | 0.316    | 1.264   |                |                    |
| 11                                |          | Armatūra S500                 |       | kg        | 4      | 31.60    | 126.40  |                |                    |
| 12                                |          | Įdėtinių detalių plienas S355 |       | kg        | 4      | 60.00    | 240.00  |                |                    |
| 13                                | K-5.4    | Kolona 300x300x3510           |       |           |        |          |         |                |                    |
| 14                                |          | Betonas C30/37 X0             |       | m³        | 4      | 0.316    | 1.264   |                |                    |
| 15                                |          | Armatūra S500                 |       | kg        | 4      | 31.60    | 126.40  |                |                    |
| 16                                |          | Įdėtinių detalių plienas S355 |       | kg        | 4      | 60.00    | 240.00  |                |                    |
| Viso betono, m³:                  |          |                               |       |           |        | 7.584    |         |                |                    |
| Viso armatūros, kg:               |          |                               |       |           |        | 758.40   |         |                |                    |
| Viso įdėtinių detalių plieno, kg: |          |                               |       |           |        | 1440.0   |         |                |                    |

GELŽBETONINIŲ PENKTO AUKŠTO KOLONŲ MONOLITINIMO SAŃAUDŲ KIEKIŲ ŽINIARAŠTIS

| Eil. Nr.                                   | Pozicija | Pavadinimas                      | Žymuo | Mato vnt. | Kiekis | SaŃaudos |         | Svoris vnt., t | Papildomi duomenys |
|--------------------------------------------|----------|----------------------------------|-------|-----------|--------|----------|---------|----------------|--------------------|
|                                            |          |                                  |       |           |        | Vien.    | Iš viso |                |                    |
| 1                                          | K-5.1    | Kolona 300x300x3510              |       |           |        |          |         |                |                    |
| 2                                          |          | Nesitraukiantis skiedinys C30/37 |       | m³        | 4      | 0.019    | 0.074   |                |                    |
| 3                                          | K-5.2    | Kolona 300x300x3510              |       |           |        |          |         |                |                    |
| 4                                          |          | Nesitraukiantis skiedinys C30/37 |       | m³        | 12     | 0.019    | 0.222   |                |                    |
| 5                                          | K-5.3    | Kolona 300x300x3510              |       |           |        |          |         |                |                    |
| 6                                          |          | Nesitraukiantis skiedinys C30/37 |       | m³        | 4      | 0.019    | 0.074   |                |                    |
| 7                                          | K-5.4    | Kolona 300x300x3510              |       |           |        |          |         |                |                    |
| 8                                          |          | Nesitraukiantis skiedinys C30/37 |       | m³        | 4      | 0.019    | 0.074   |                |                    |
| Viso nesitraukiančio skiedinio C30/37, m³: |          |                                  |       |           |        | 0.444    |         |                |                    |

ANTRO - PENKTO AUKŠTŲ PLIENINIŲ RYŠIŲ SAŃAUDŲ KIEKIŲ ŽINIARAŠTIS

| Eil. Nr.         | Pozicija | Pavadinimas                  | Žymuo | Mato vnt. | Kiekis | SaŃaudos |         | Svoris vnt., t | Papildomi duomenys |
|------------------|----------|------------------------------|-------|-----------|--------|----------|---------|----------------|--------------------|
|                  |          |                              |       |           |        | Vien.    | Iš viso |                |                    |
| 1                | VR-x.1   | Plieniniai vertikalūs ryšiai |       | vnt.      | 16     | 170.03   | 2720.5  |                |                    |
| 2                |          | Ø101.6x6, S355, L=4700       |       | kg        | 1      | 66.27    | 66.27   |                |                    |
| 3                |          | Ø88.9x5, S355, L=2525        |       | kg        | 2      | 26.01    | 52.02   |                |                    |
| 4                |          | Ø88.9x5, S355, L=1212        |       | kg        | 2      | 12.49    | 24.98   |                |                    |
| 5                |          | Ø88.9x5, S355, L=1299        |       | kg        | 2      | 13.38    | 26.76   |                |                    |
| Viso plieno, kg: |          |                              |       |           |        | 2720.5   |         |                |                    |

|                            |                                                                                                                   |                                                                                                                                       |         |                     |                                                                                      |                                             |  |       |      |
|----------------------------|-------------------------------------------------------------------------------------------------------------------|---------------------------------------------------------------------------------------------------------------------------------------|---------|---------------------|--------------------------------------------------------------------------------------|---------------------------------------------|--|-------|------|
| KVAL.<br>PATV.<br>DOK. NR. |                                                                                                                   | UAB "Konstrukcijų pasaulis"                                                                                                           |         |                     | STATINIO PROJEKTO PAVADINIMAS                                                        |                                             |  |       |      |
|                            |                                                                                                                   | Jonavos g. 260, Kaunas<br>Įm. k.: 304690224<br>Tel. +370 (613) 98089<br>El.p.: k.pazereckas@gmail.com<br>www.konstrukciju-pasaulis.lt |         |                     | Negyvenamasis 5 aukštų surenkamo gelžbetonio konstrukcijų mokslo paskirties pastatas |                                             |  |       |      |
|                            |                                                                                                                   | 37603                                                                                                                                 | PDV     | Kęstutis Pažereckas | 2018 08                                                                              | DOKUMENTO PAVADINIMAS                       |  | LAIDA |      |
|                            |                                                                                                                   | 37603                                                                                                                                 | Konstr. | Kęstutis Pažereckas | 2018 08                                                                              | Antro/trečio/ketvirtio/penkto aukštų planas |  | O     |      |
|                            |                                                                                                                   |                                                                                                                                       |         |                     |                                                                                      |                                             |  |       |      |
| LT                         | UŽSAKOVAS                                                                                                         |                                                                                                                                       |         |                     | BRĖŽINIO ŽYMUO                                                                       |                                             |  | LAPAS | LAPŲ |
|                            | Miškų institutas, Lietuvos agrarinių ir miškų mokslų centro filialas, Liepų g. 1, Girionių k., LT-53101, Kauno r. |                                                                                                                                       |         |                     | KPRS18/02-TP-SK-3.11                                                                 |                                             |  | 1     | 1    |
|                            |                                                                                                                   |                                                                                                                                       |         |                     |                                                                                      |                                             |  |       |      |

DENGINIO RYGELIŲ PLANAS MASTELIS 1:100

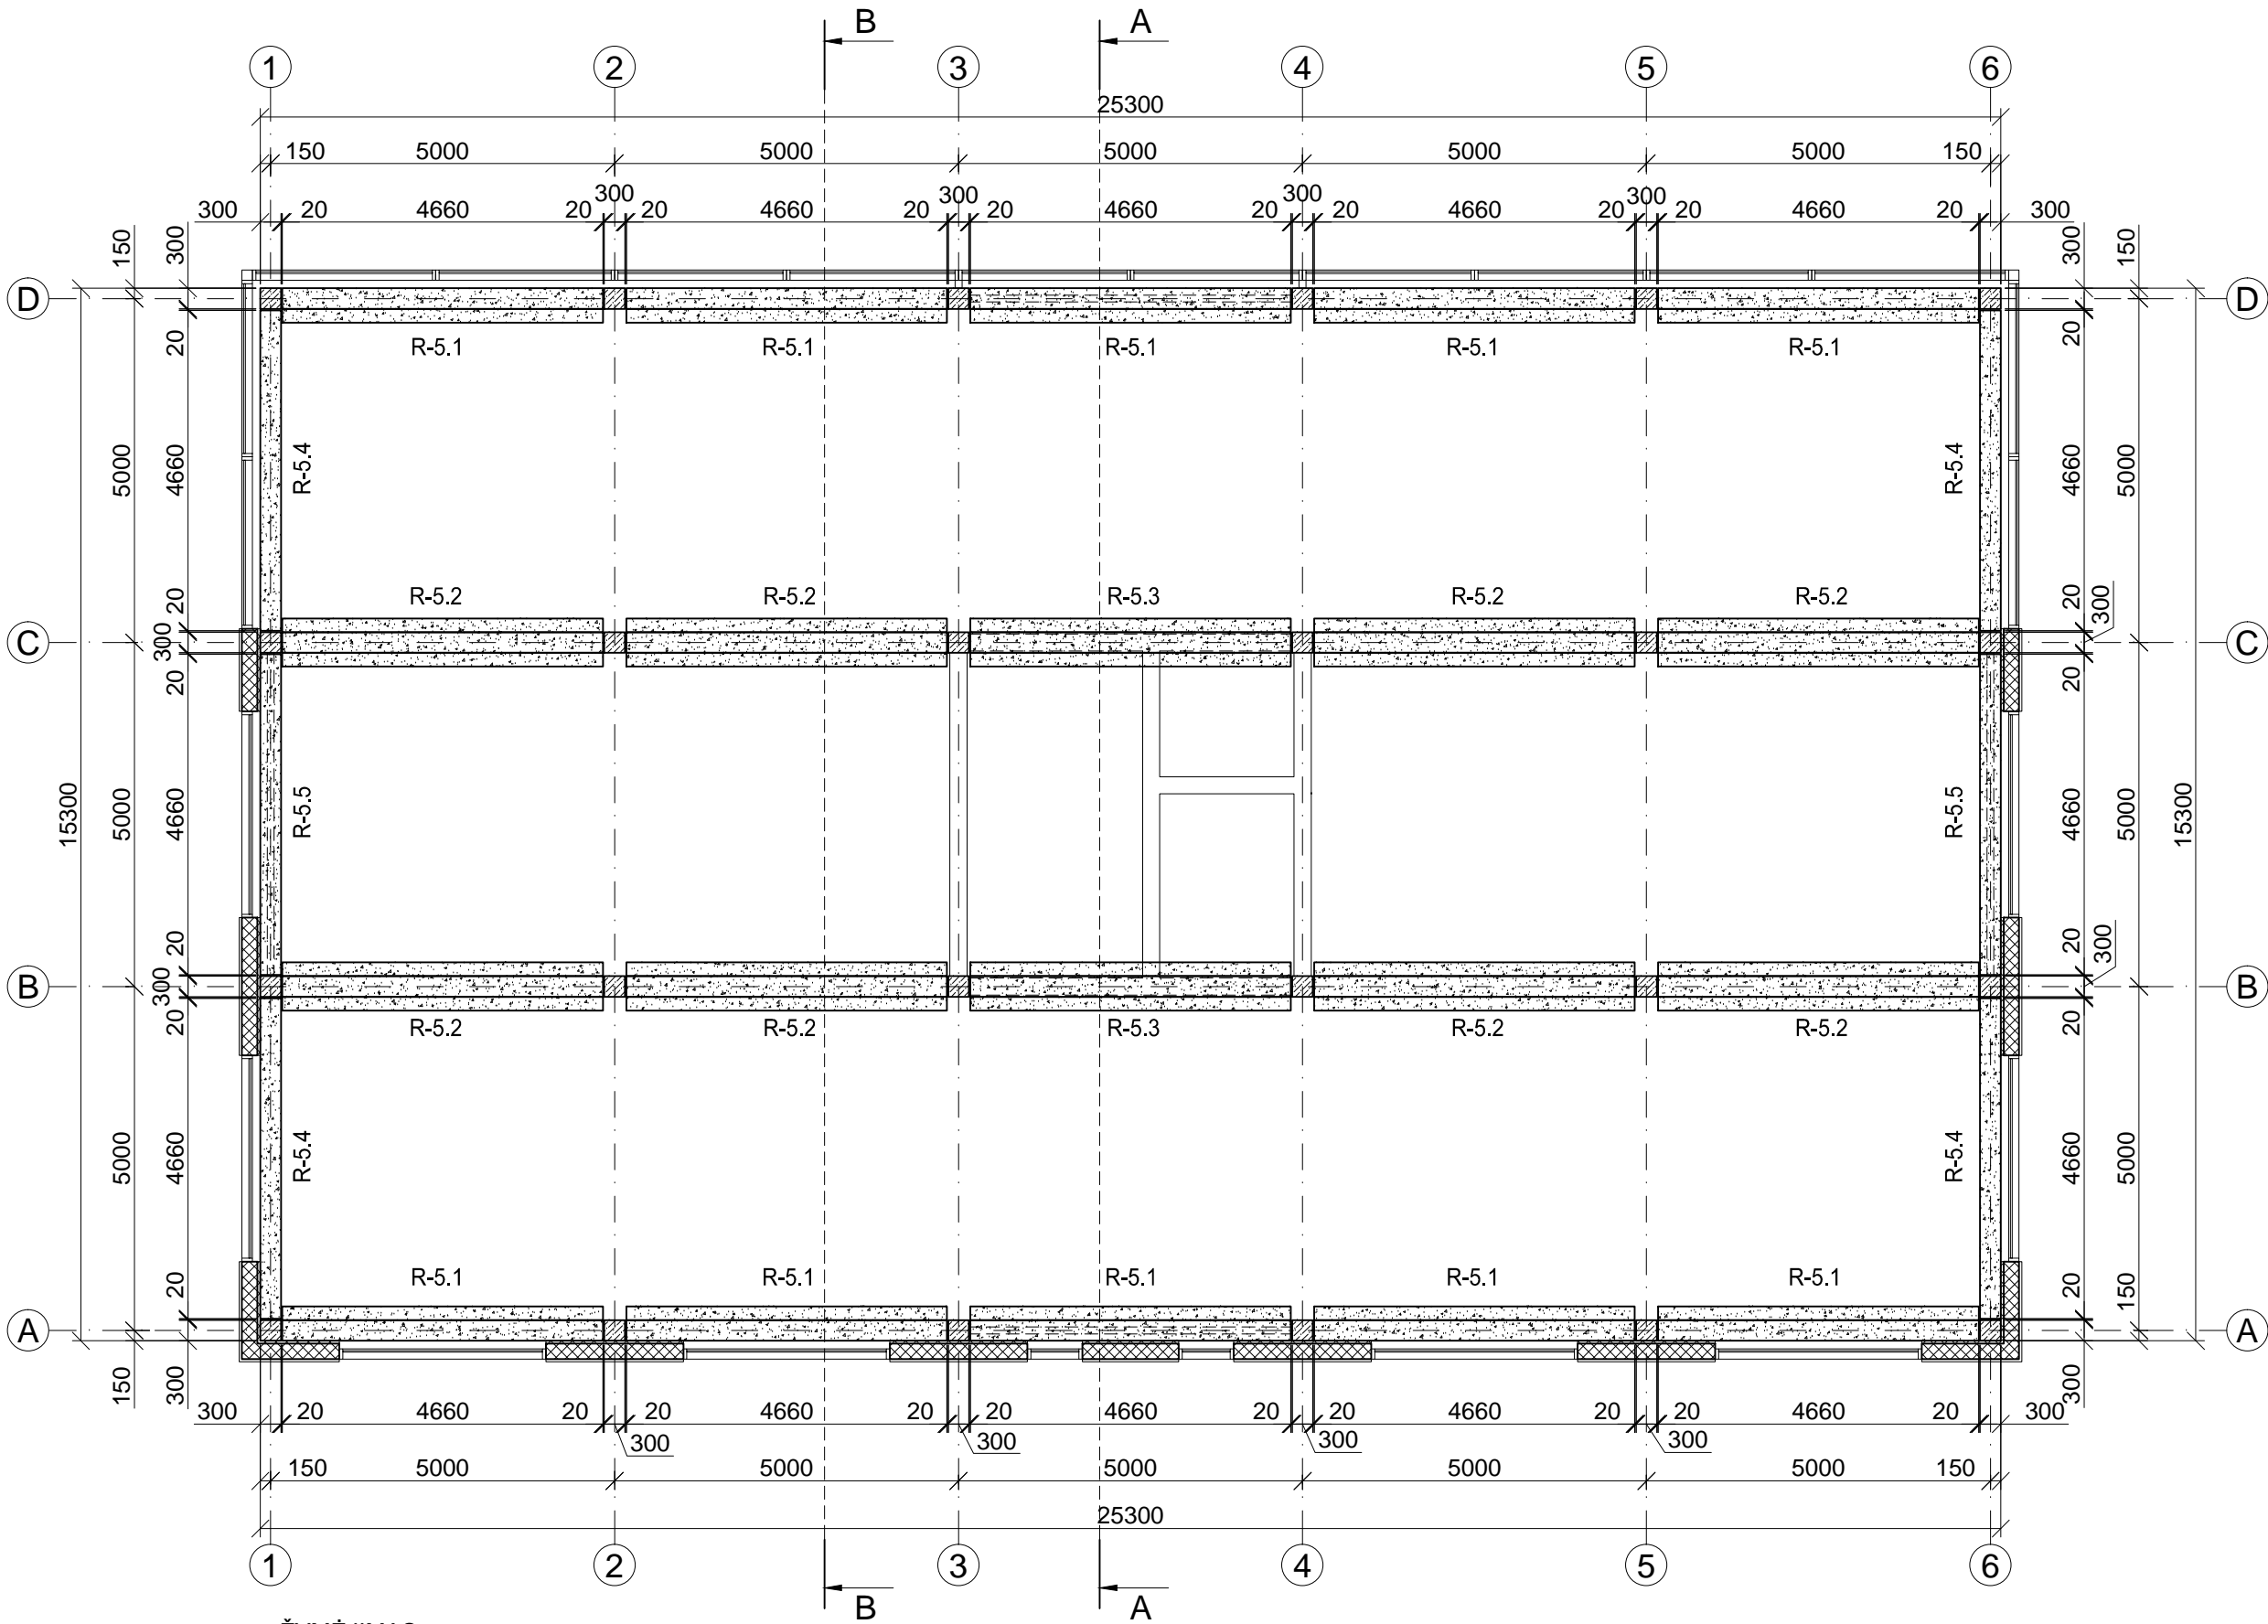

ŽYMĖJIMAS:  
R-... - Gelžbetoninis rygelis;

PASTABOS:

- Surenkamų g/b rygelių montavimui ant kolonų naudojamos paslėptos plieninės jungtys.
- Surenkamų g/b rygelių įdėtinės detalės projektuojamos darbo projekto stadijoje.
- Gelžbetoniniams rygeliams naudojamas C30/37,X0 stiprumo klasės betonas, pagal LST EN 206-1:2002.
- Gelžbetoniniai rygeliai armuojami S500 stiprumo klasės armatūros strypynais, pagal LST EN ISO 15630-1:2010. Gelžbetoninių rygelių išilginė armatūra sujungiama užleidimu, praeičiant ne mažiau 40·d (d - didesnio iš jungiamų strypų skersmuo).
- Gelžbetonio rygelių atsparumas ugniai R45 min.
- Monolitinėms laiptinių ir lifto šachtų standumo sienoms naudojamas C30/37 X0 klasės betonas, pagal LST EN 206-1:2002.
- Monolitiniai elementai armuojami S500 stiprumo klasės armatūros tinklais ir/ar strypynais, pagal LST EN ISO 15630-1:2010.
- Darbai vykdomi pagal darbo projektą.

GELŽBETONINIŲ DENGINIO RYGELIŲ SAŪAUDŲ KIEKIŲ ŽINIARAŠTIS

| Eil. Nr.                          | Pozicija | Pavadinimas                   | Žymuo | Mato vnt. | Kiekis | Šaūaudos Vien. | Iš viso | Svoris vnt., t | Papildomi duomenys |
|-----------------------------------|----------|-------------------------------|-------|-----------|--------|----------------|---------|----------------|--------------------|
| 1                                 | R-5.1    | Rygelis L500x400x4660         |       |           |        |                |         |                |                    |
| 2                                 |          | Betonas C30/37 X0             |       | m³        | 10     | 0.746          | 7.460   |                |                    |
| 3                                 |          | Armatūra S500                 |       | kg        | 10     | 89.52          | 895.2   |                |                    |
| 4                                 |          | Įdėtinių detalių plienas S355 |       | kg        | 10     | 50             | 500.00  |                |                    |
| 5                                 | R-5.2    | Rygelis T700x400x4660         |       |           |        |                |         |                |                    |
| 6                                 |          | Betonas C30/37 X0             |       | m³        | 8      | 0.932          | 7.456   |                |                    |
| 7                                 |          | Armatūra S500                 |       | kg        | 8      | 111.84         | 894.72  |                |                    |
| 8                                 |          | Įdėtinių detalių plienas S355 |       | kg        | 8      | 50             | 400.00  |                |                    |
| 9                                 | R-5.3    | Rygelis T700x400x4660         |       |           |        |                |         |                |                    |
| 10                                |          | Betonas C30/37 X0             |       | m³        | 2      | 0.932          | 1.864   |                |                    |
| 11                                |          | Armatūra S500                 |       | kg        | 2      | 111.84         | 223.68  |                |                    |
| 12                                |          | Įdėtinių detalių plienas S355 |       | kg        | 2      | 50             | 100.00  |                |                    |
| 13                                | R-5.4    | Rygelis 300x400x4660          |       |           |        |                |         |                |                    |
| 14                                |          | Betonas C30/37 X0             |       | m³        | 4      | 0.559          | 2.236   |                |                    |
| 15                                |          | Armatūra S500                 |       | kg        | 4      | 67.08          | 268.32  |                |                    |
| 16                                |          | Įdėtinių detalių plienas S355 |       | kg        | 4      | 40             | 160.00  |                |                    |
| 17                                | R-5.5    | Rygelis 300x400x4660          |       |           |        |                |         |                |                    |
| 18                                |          | Betonas C30/37 X0             |       | m³        | 2      | 0.559          | 1.118   |                |                    |
| 19                                |          | Armatūra S500                 |       | kg        | 2      | 67.08          | 134.16  |                |                    |
| 20                                |          | Įdėtinių detalių plienas S355 |       | kg        | 2      | 50             | 100.00  |                |                    |
| Viso betono, m³:                  |          |                               |       |           |        |                | 20.134  |                |                    |
| Viso armatūros, kg:               |          |                               |       |           |        |                | 2416.1  |                |                    |
| Viso įdėtinių detalių plieno, kg: |          |                               |       |           |        |                | 1260.0  |                |                    |

|                      |                                                                                                                   |                                                                                                                                       |                      |                                                                                      |         |                                                  |
|----------------------|-------------------------------------------------------------------------------------------------------------------|---------------------------------------------------------------------------------------------------------------------------------------|----------------------|--------------------------------------------------------------------------------------|---------|--------------------------------------------------|
| KVAL. PATV. DOK. NR. |                                                                                                                   | UAB "Konstrukcijų pasaulis"                                                                                                           |                      | STATINIO PROJEKTO PAVADINIMAS                                                        |         |                                                  |
|                      |                                                                                                                   | Jonavos g. 260, Kaunas<br>Įm. k.: 304690224<br>Tel. +370 (613) 98089<br>El.p.: k.pazereckas@gmail.com<br>www.konstrukciju-pasaulis.lt |                      | Negyvenamasis 5 aukštų surenkamo gelžbetonio konstrukcijų mokslo paskirties pastatas |         |                                                  |
|                      |                                                                                                                   | 37603                                                                                                                                 | PDV                  | Kęstutis Pažereckas                                                                  | 2018 08 | DOKUMENTO PAVADINIMAS<br>Denginio rygelių planas |
|                      |                                                                                                                   | 37603                                                                                                                                 | Konstr.              | Kęstutis Pažereckas                                                                  | 2018 08 |                                                  |
| LT                   | UŽSAKOVAS                                                                                                         |                                                                                                                                       | BRĖŽINIO ŽYMUO       |                                                                                      |         | LAPAS                                            |
|                      | Miškų institutas, Lietuvos agrarinių ir miškų mokslų centro filialas, Liepų g. 1, Girionių k., LT-53101, Kauno r. |                                                                                                                                       | KPRS18/02-TP-SK-3.12 |                                                                                      |         | LAPŲ                                             |
|                      |                                                                                                                   |                                                                                                                                       |                      |                                                                                      |         | 11                                               |

DENGINIO PLOKŠTĖS PLANAS MASTELIS 1:100

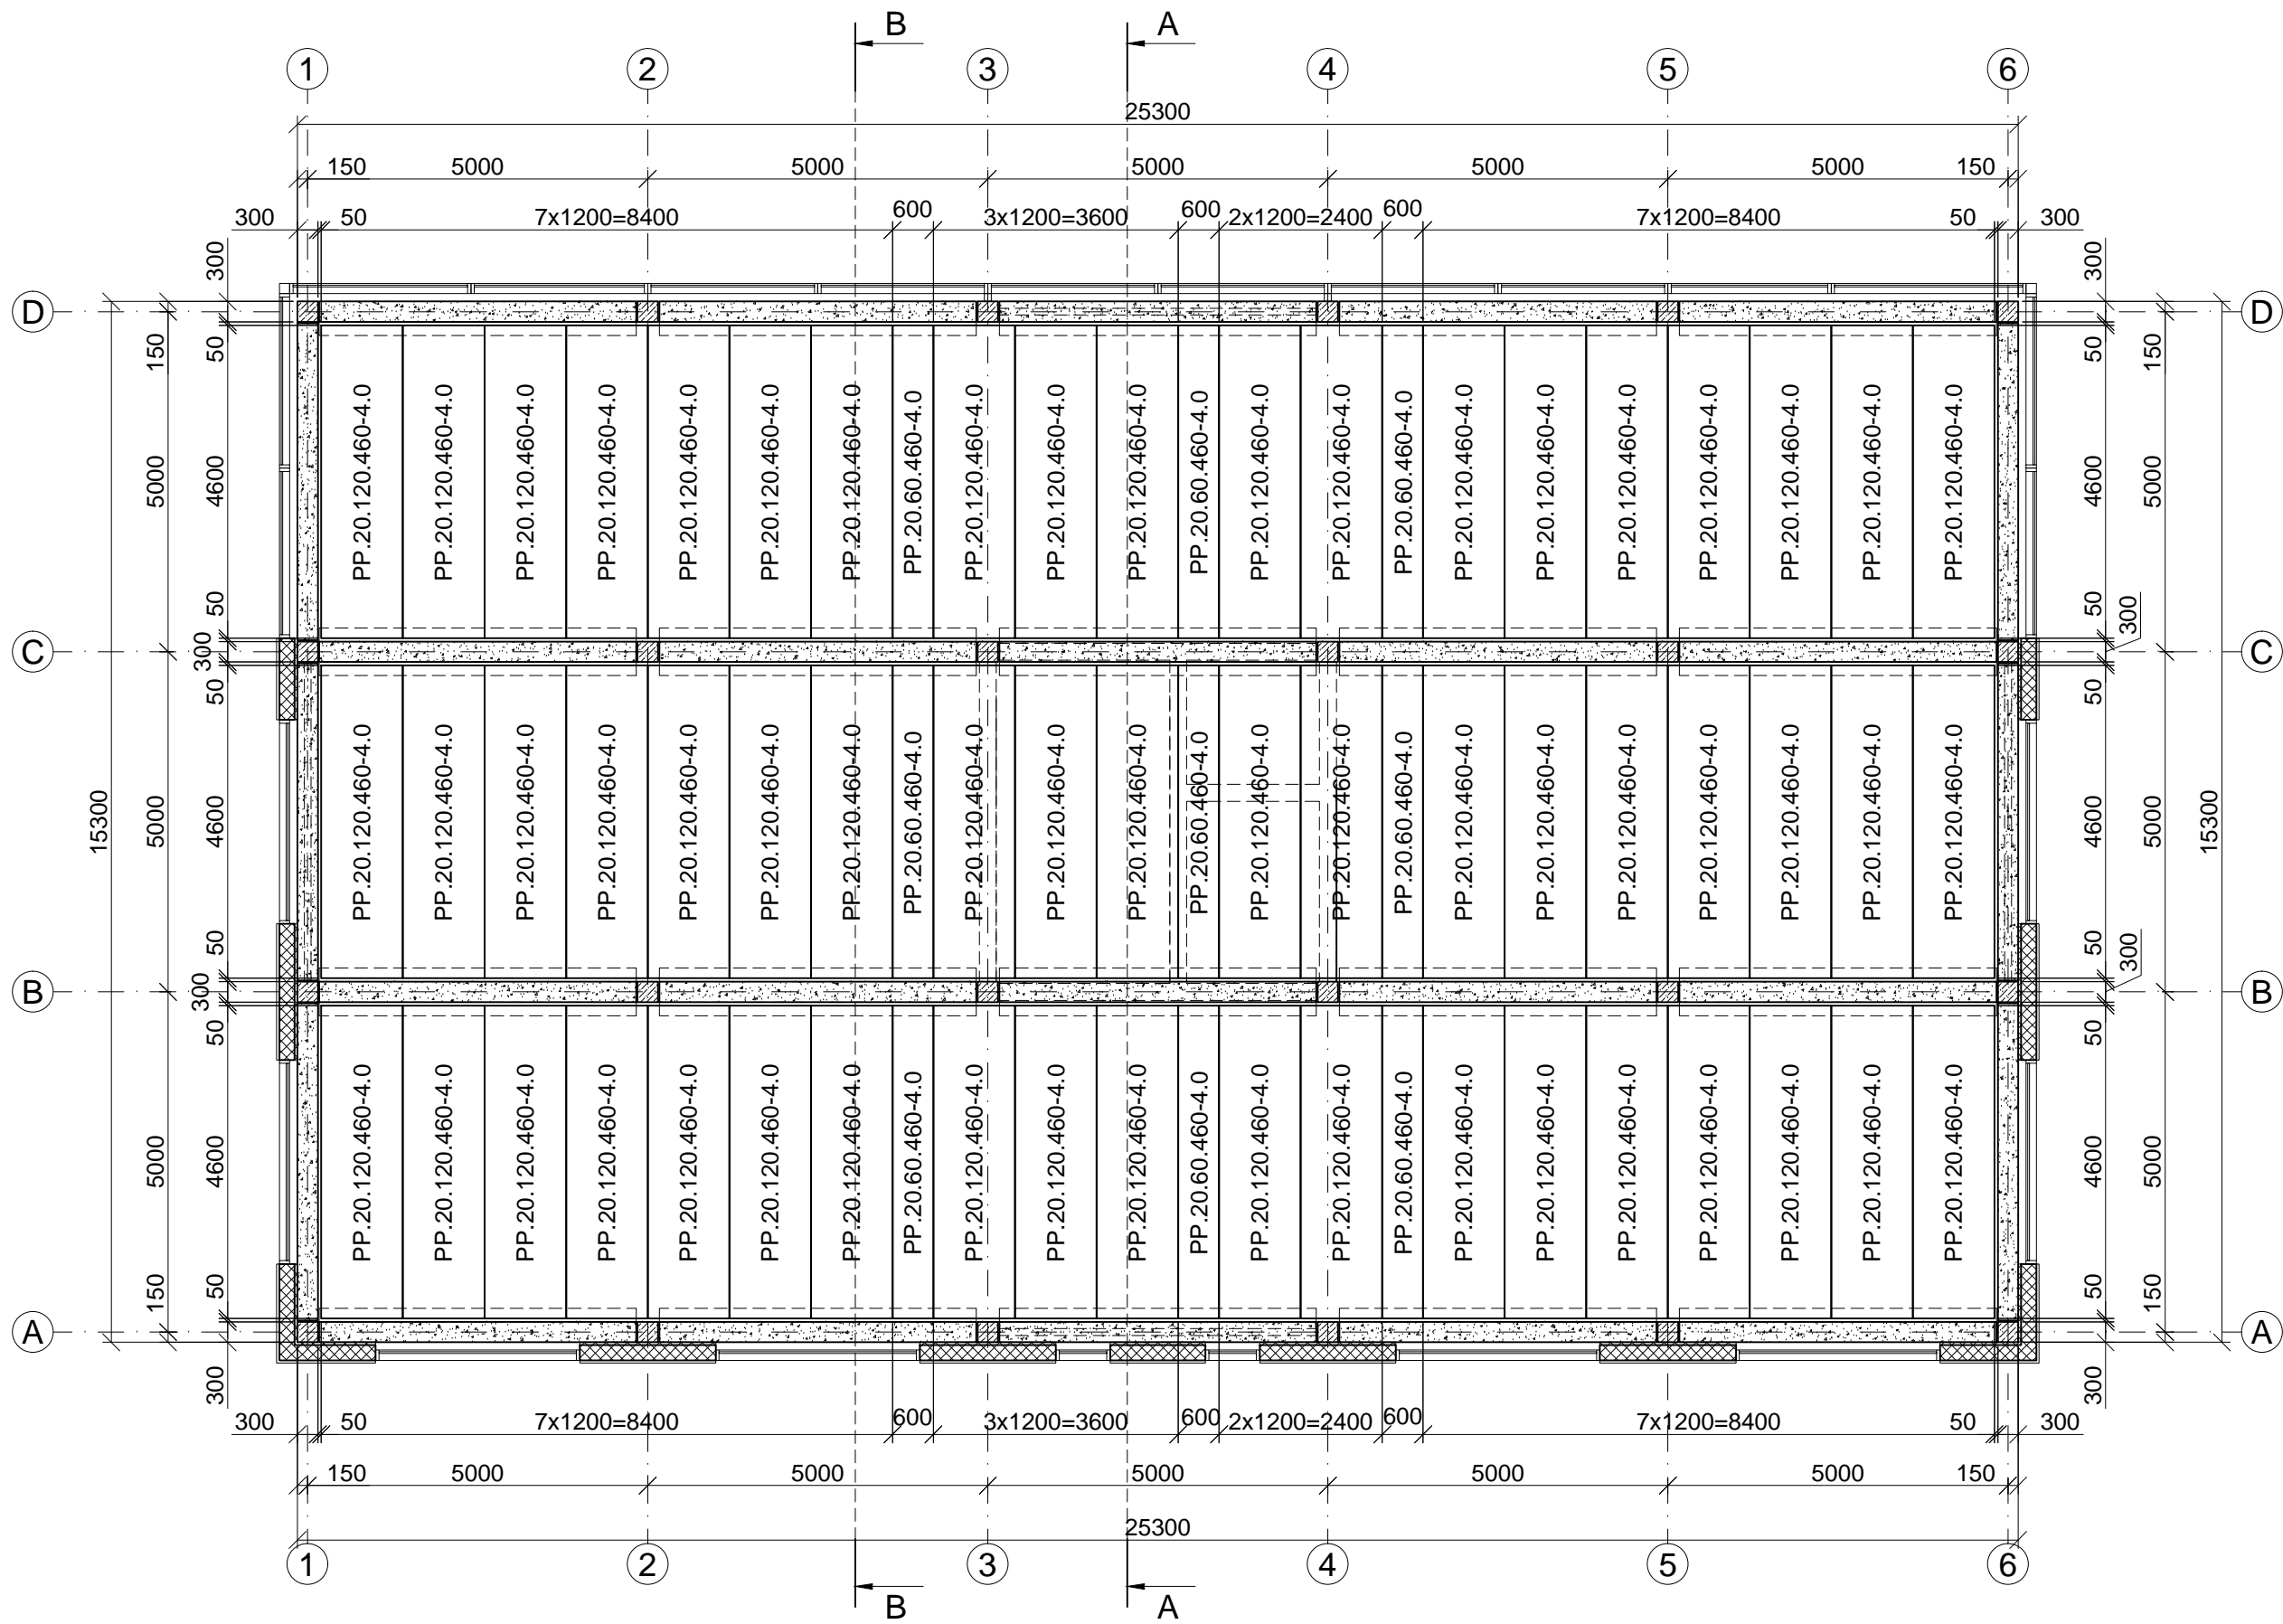

ŽYMĖJIMAS:  
PP - surenkama kiaurymėta perdangos plokštė  
PP.20.120-460-4.0:  
20 - storis, cm  
120 - plotis, cm  
460 - ilgis, cm  
4.0 - skaičiuojamoji apkrova ant plokštės,  
kN/m²

- PASTABOS:
- Surenkamos g/b plokštės ir monolitinės perdangos ant rygių atremiamos ne mažiau kaip 150 mm.
  - Visos perdangos plokštės inkaruojamos tarpusavyje, monolitiniuose ruožuose ir rygiuose.
  - Tarpai tarp plokščių užtaisomi C30/37 klasės betonu.
  - Monolitinėms perdangoms naudojamas C30/37 stiprumo klasės betonas, pagal LST EN 206-1:2002. Perdangos armuojamos S500 stiprumo klasės armatūros tinklais ir strypynais, pagal LST EN ISO 15630-1:2003.
  - Surenkamos perdangos plokštės atitinka UAB "Betonika" gaminių sortimentą (gali būti pakeistos analogiškų parametrų plokštėmis).
  - Perdangos atsparumas ugniai REI 60 min.

SURENKAMŲ GELŽBETONINIŲ DENGINIO PLOKŠČIŲ IR JŲ MONOLITINIMO SĄNAUDŲ KIEKIŲ ŽINIARAŠTIS

| Eil. Nr. | Pozicija | Pavadinimas          | Žymuo | Mato vnt. | Kiekis | Sąnaudos            |         | Svoris vnt., t | Papildomi duomenys |
|----------|----------|----------------------|-------|-----------|--------|---------------------|---------|----------------|--------------------|
|          |          |                      |       |           |        | Vien.               | Iš viso |                |                    |
| 1        |          | PP.20.120.460-7.0    |       | vnt.      | 57     |                     |         | 1.750          | 99.8 t (viso)      |
| 2        |          | Betonas C30/37 X0    |       | m³        | 57     | 0.700               | 39.900  |                |                    |
| 3        |          | Armatūra A800        |       | kg        | 57     | 35.00               | 1995.0  |                |                    |
| 4        |          | PP.20.60.460-7.0     |       | vnt.      | 9      |                     |         | 0.875          | 7.9 t (viso)       |
| 5        |          | Betonas C30/37 X0    |       | m³        | 9      | 0.350               | 3.150   |                |                    |
| 6        |          | Armatūra A800        |       | kg        | 9      | 17.50               | 157.5   |                |                    |
| 7        |          | Plokščių monolitinis |       |           |        |                     |         |                |                    |
| 8        |          | Betonas C30/37 X0    |       | m³        | -      | -                   | 4.700   |                |                    |
| 9        |          | Armatūra S500        |       | kg        | -      | -                   | 470.0   |                |                    |
|          |          |                      |       |           |        | Viso betono, m³:    |         | 47.750         |                    |
|          |          |                      |       |           |        | Viso armatūros, kg: |         | 2622.5         |                    |

|                      |                                                                                                                   |                                                                                                                                       |                      |                                                                                      |         |                                                   |
|----------------------|-------------------------------------------------------------------------------------------------------------------|---------------------------------------------------------------------------------------------------------------------------------------|----------------------|--------------------------------------------------------------------------------------|---------|---------------------------------------------------|
| KVAL. PATV. DOK. NR. |                                                                                                                   | UAB "Konstrukcijų pasaulis"                                                                                                           |                      | STATINIO PROJEKTO PAVADINIMAS                                                        |         |                                                   |
|                      |                                                                                                                   | Jonavos g. 260, Kaunas<br>Įm. k.: 304690224<br>Tel. +370 (613) 98089<br>El.p.: k.pazereckas@gmail.com<br>www.konstrukciju-pasaulis.lt |                      | Negyvenamasis 5 aukštų surenkamo gelžbetonio konstrukcijų mokslo paskirties pastatas |         |                                                   |
|                      |                                                                                                                   | 37603                                                                                                                                 | PDV                  | Kęstutis Pažereckas                                                                  | 2018 08 | DOKUMENTO PAVADINIMAS<br>Denginio plokštės planas |
|                      |                                                                                                                   | 37603                                                                                                                                 | Konstr.              | Kęstutis Pažereckas                                                                  | 2018 08 |                                                   |
| LT                   | UŽSAKOVAS                                                                                                         |                                                                                                                                       | BREŽINIO ŽYMUO       |                                                                                      |         | LAPAS                                             |
|                      | Miškų institutas, Lietuvos agrarinių ir miškų mokslų centro filialas, Liepų g. 1, Girionių k., LT-53101, Kauno r. |                                                                                                                                       | KPRS18/02-TP-SK-3.13 |                                                                                      |         | LAPŲ                                              |
|                      |                                                                                                                   |                                                                                                                                       |                      |                                                                                      |         | 1 1                                               |



PJŪVIS A-A MASTELIS 1:50

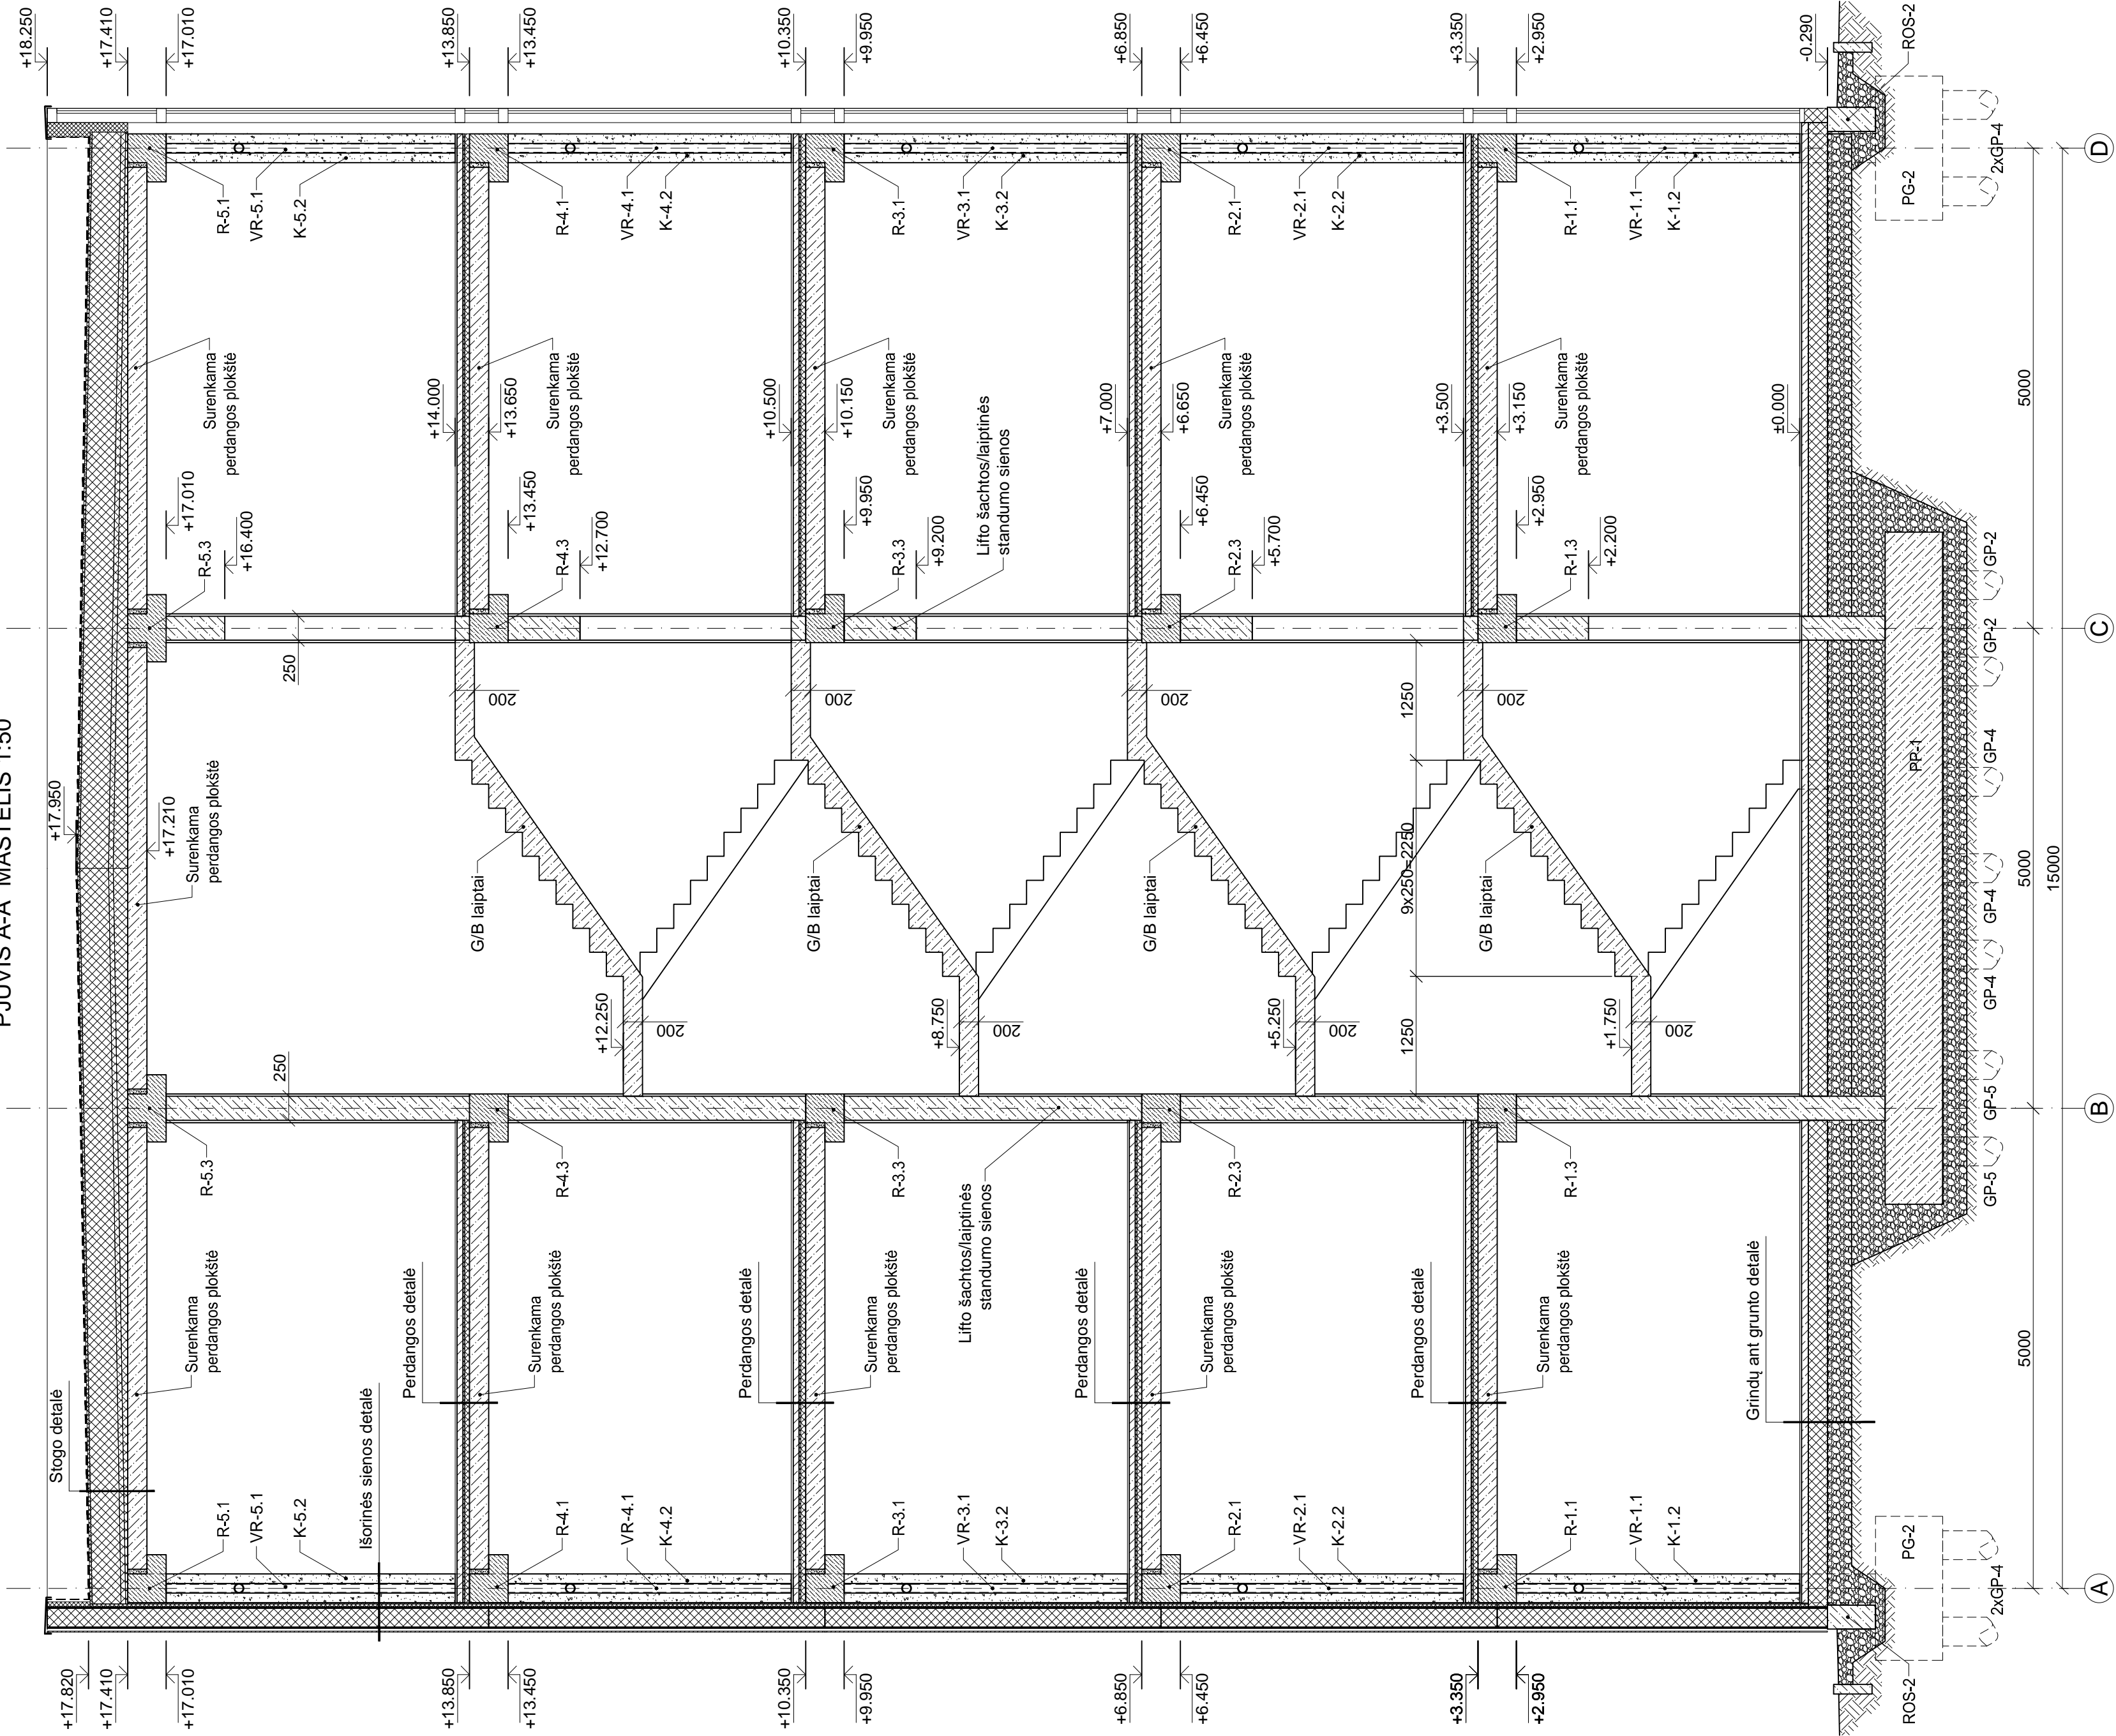

|                             |                                                                                                                      |                                                                                                                   |                     |      |  |
|-----------------------------|----------------------------------------------------------------------------------------------------------------------|-------------------------------------------------------------------------------------------------------------------|---------------------|------|--|
| K/VAL.<br>PATV.<br>DOK. NR. |                                 | UAB "Konstrukcijų pasaulis"                                                                                       |                     |      |  |
|                             |                                                                                                                      | Jonavos g. 260, Kaunas<br>Įm. k.: 304607070, kodas<br>Etp.: Kaizerredas@gmail.com<br>www.konstrukcija-pasaulis.lt |                     |      |  |
| 37603                       | PDV                                                                                                                  | 2018 08                                                                                                           | Kėstutis Pažereckas |      |  |
| 37603                       | Konstr.                                                                                                              | 2018 08                                                                                                           | Kėstutis Pažereckas |      |  |
| LT                          | UŽSAKOVAS                                                                                                            | BRĖŽINIO ŽYMŲO                                                                                                    |                     |      |  |
|                             |                                                                                                                      |                                                                                                                   |                     |      |  |
|                             | Miški institutas, Lietuvos agrarinių ir miškų mokslų<br>centro filialas, Liepų g. 1, Girionių k., LT-53101, Kauno r. | KPRS/18/02-TP-SK-3.14                                                                                             | LAPAS               | LAPŲ |  |
|                             |                                                                                                                      |                                                                                                                   | 1                   | 1    |  |



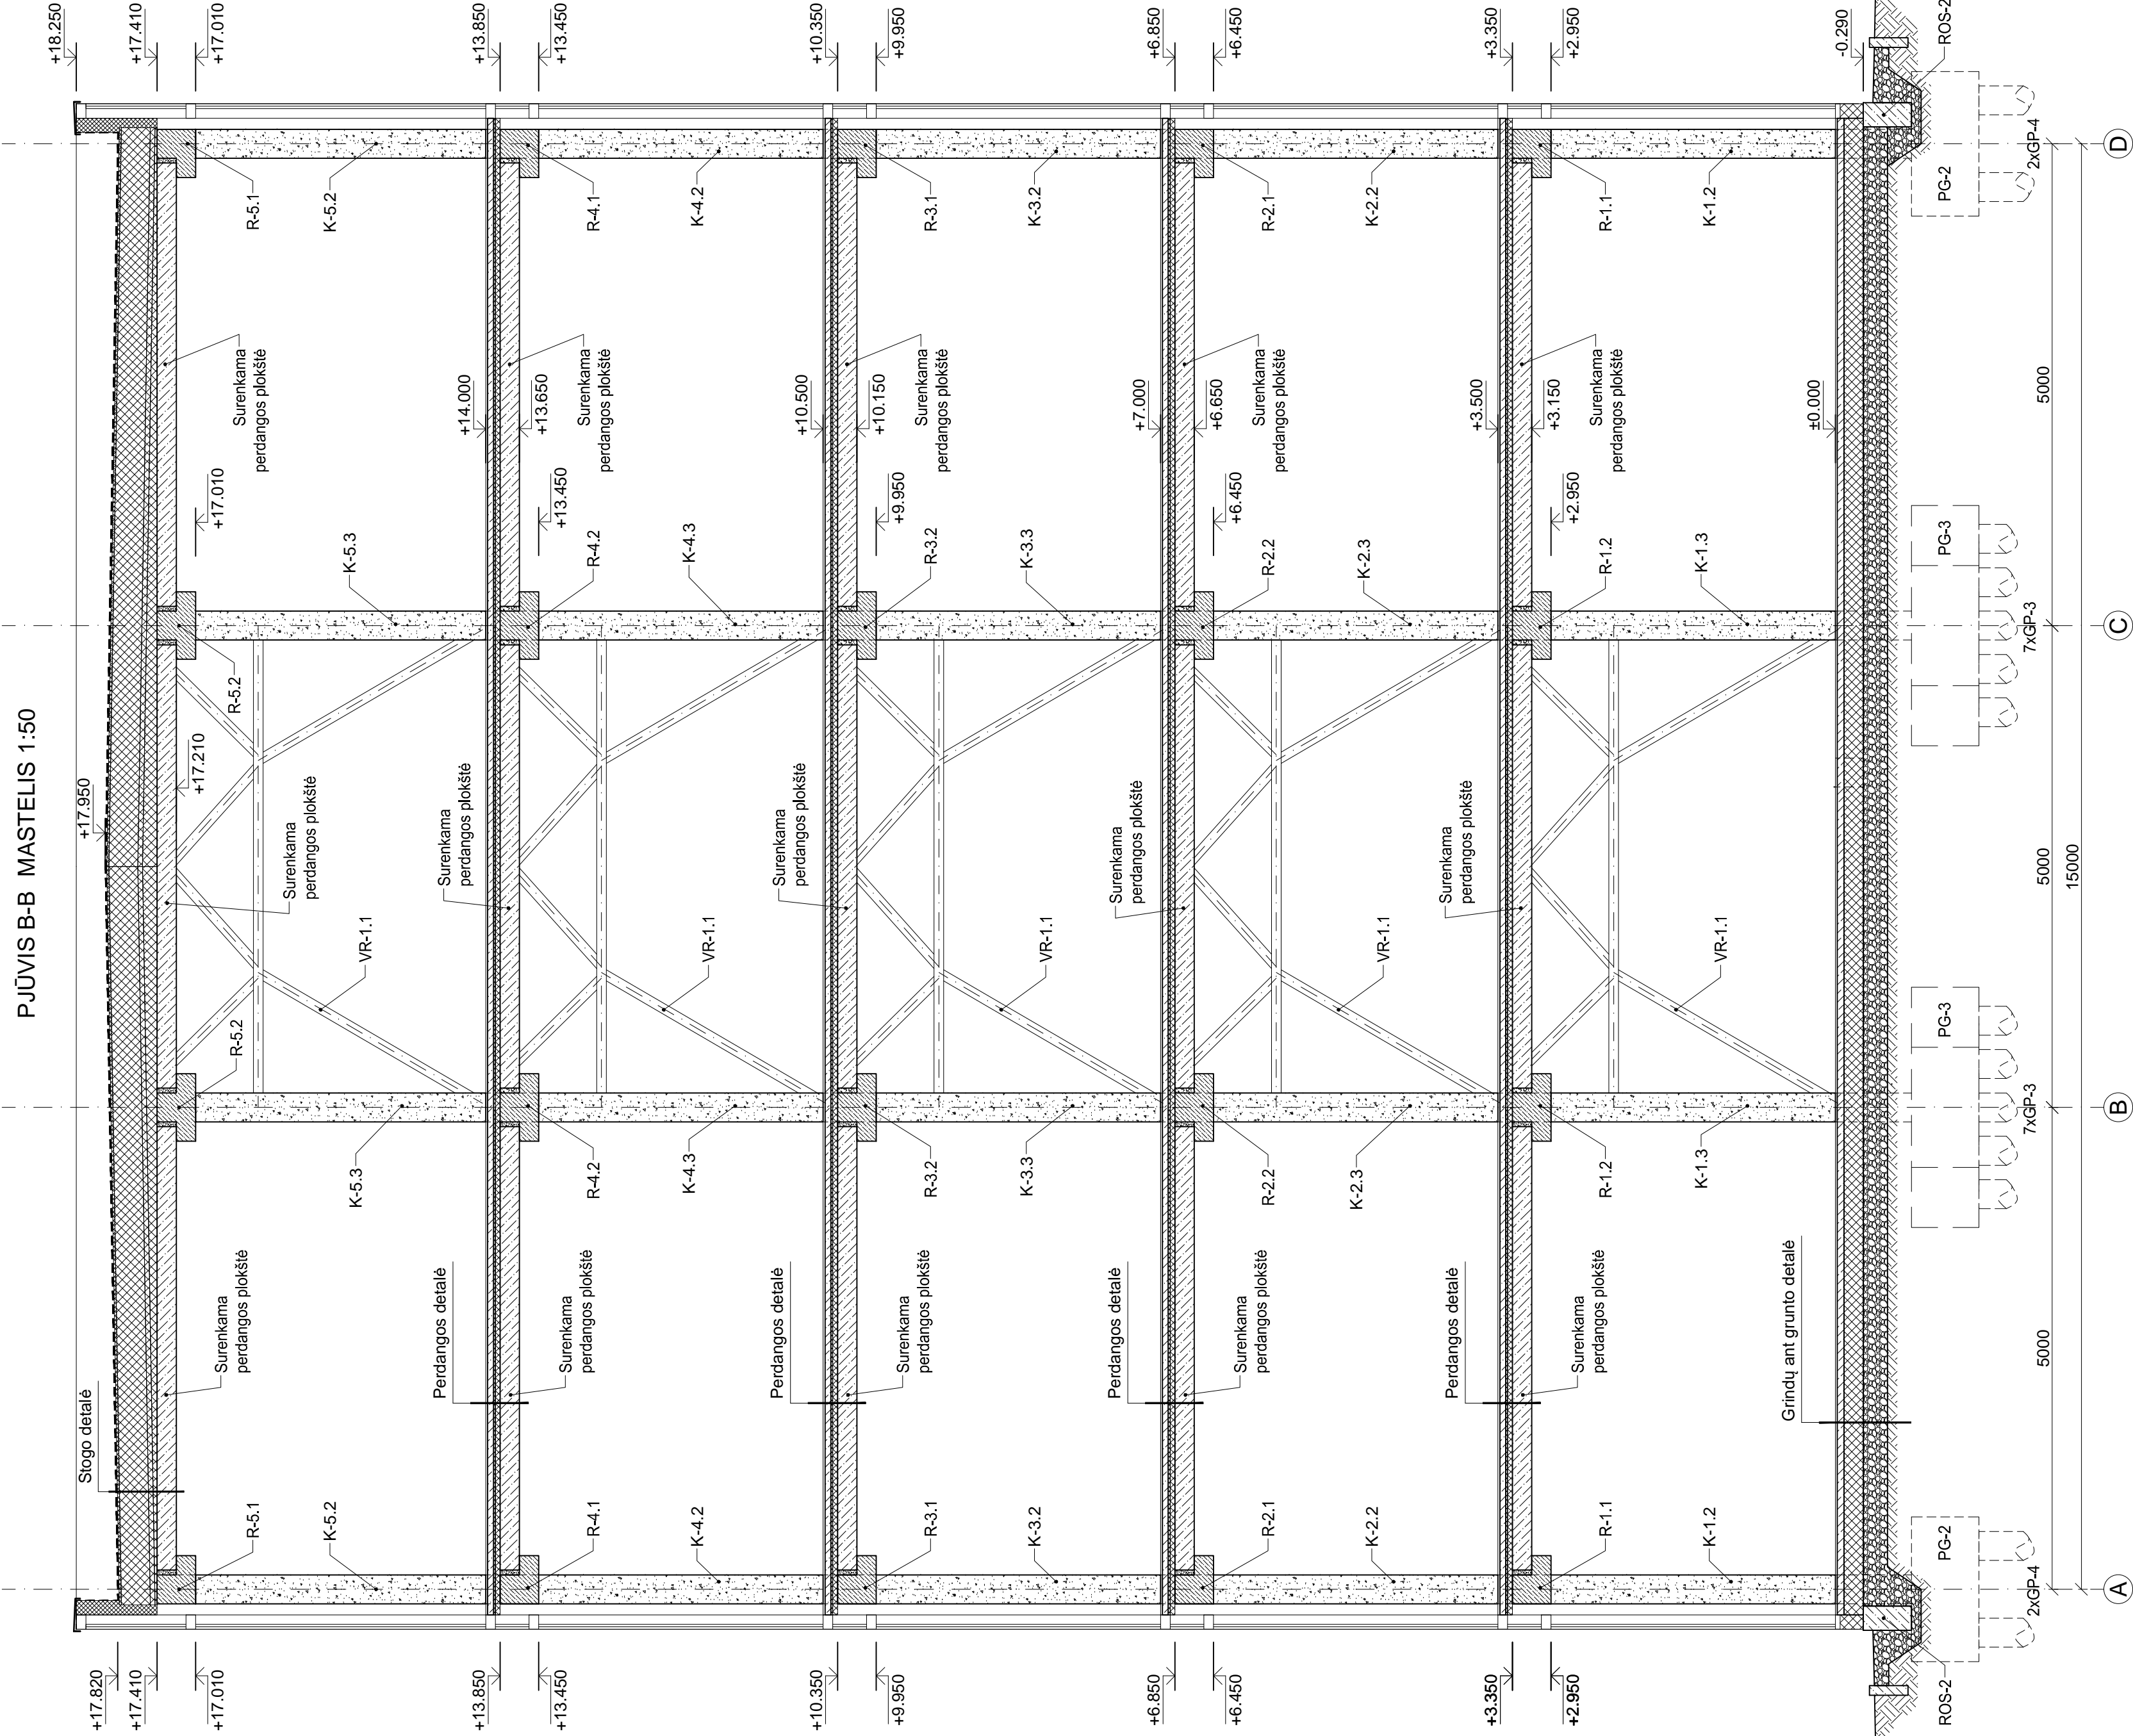

|                             |                                                                                       |                                                                                                                                               |                     |  |  |
|-----------------------------|---------------------------------------------------------------------------------------|-----------------------------------------------------------------------------------------------------------------------------------------------|---------------------|--|--|
| K/VAL.<br>PATV.<br>DOK. NR. |  | UAB "Konstrukcijų pasaulis"                                                                                                                   |                     |  |  |
|                             |                                                                                       | Jonavos g. 260, Kaunas<br>Įm. k.: 304607070, kodas<br>Etp.: Kaizeredzės@gmail.com<br>www.konstrukcija-pasaulis.lt                             |                     |  |  |
| 37603                       | PDV                                                                                   | 2018 08                                                                                                                                       | Kėstutis Pažereckas |  |  |
| 37603                       | Konstr.                                                                               | 2018 08                                                                                                                                       | Kėstutis Pažereckas |  |  |
| LT                          | UŽSAKOVAS                                                                             | BREŽINIO ŽYMUO                                                                                                                                |                     |  |  |
|                             |                                                                                       | Miškų institutas, Lietuvos agrarinių ir miškų mokslų<br>centro filialas, Liepų g. 1, Girionių k., LT-53101, Kauno r.<br>KPRS/18/02-TP-SK-3.15 |                     |  |  |
|                             |                                                                                       | LAPAS                                                                                                                                         | LAPŲ                |  |  |
|                             |                                                                                       | 1                                                                                                                                             | 1                   |  |  |

NEEKSPLOATUOJAMO STOGO DETALĖ  
MASTELIS 1:10

|                                                         |
|---------------------------------------------------------|
| Bituminė / EPDM stogo danga                             |
| Nuolydį formuojantis akm. vatos sluoksnis - 20...150 mm |
| Akmens vatos šiltinamasis sluoksnis - 300 mm            |
| Garo izoliacinė plėvelė - 1 sl.                         |
| Akmens vatos šiltinamasis sluoksnis - 50 mm             |
| Surenkamos g/b perdangos plokštės - 200 mm              |
| Inžinerinės sistemos                                    |
| Pakabinamos lubos (pagal poreikį)                       |

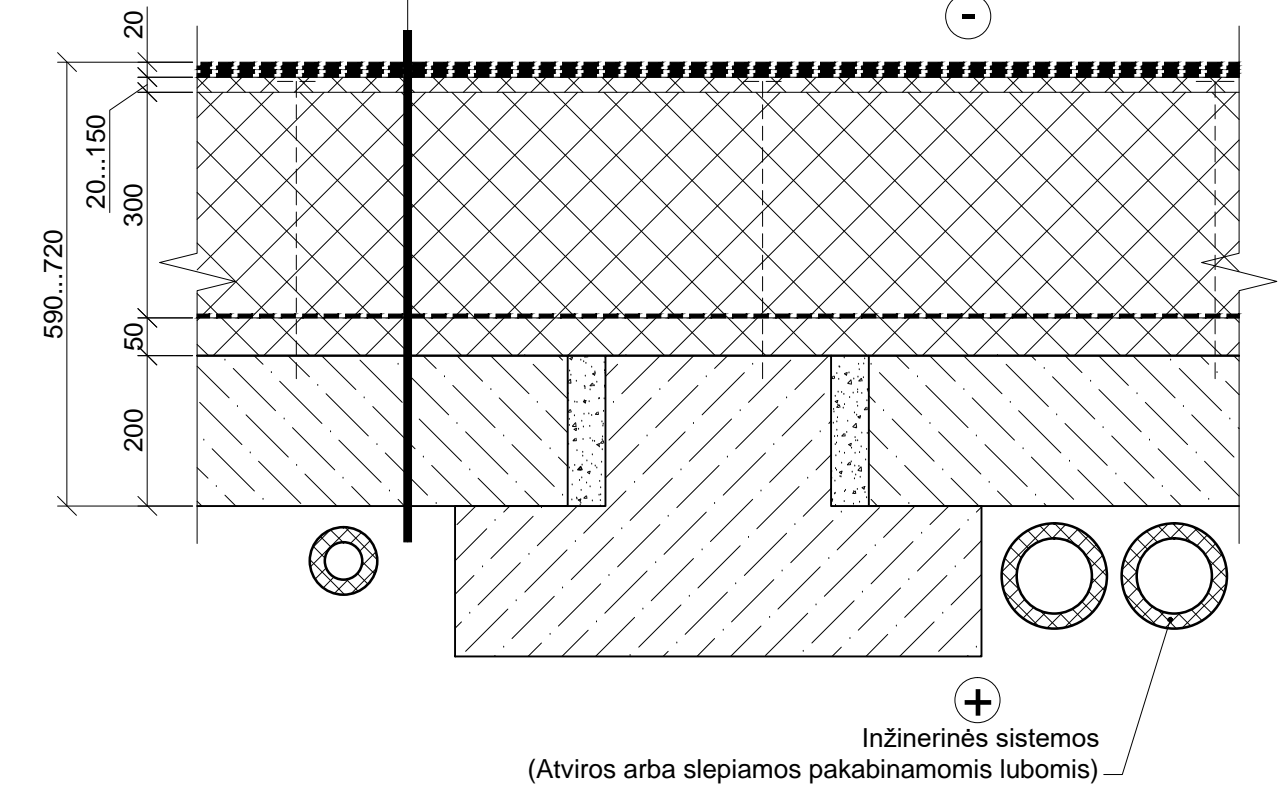

GRINDŲ ANT GRUNTO DETALĖ MASTELIS 1:10

|                                                      |
|------------------------------------------------------|
| Grindų danga - 20 mm                                 |
| 2 sl. teptinės hidroizoliacijos (drėgnoms patalpoms) |
| Armuotas išlyginamasis sluoksnis - 70 mm             |
| Polietileno plėvelė - 200 µm                         |
| Polistireninis putplastis EPS 100 - 200 mm           |
| Hidroizoliacija - 1 sl.                              |
| Sutankintas skaldos sluoksnis (fr.0/32) - 250 mm     |
| Sutankintas vietinis gruntas                         |

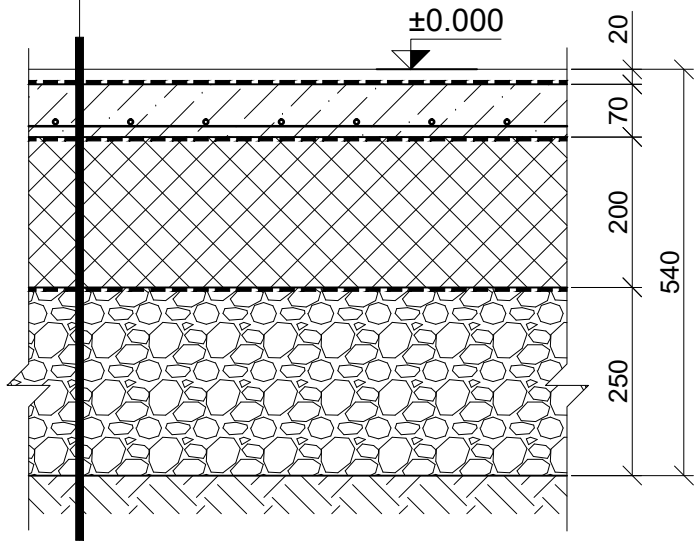

VERTIKALIEJI RYŠIAI VR-1 MASTELIS 1:40

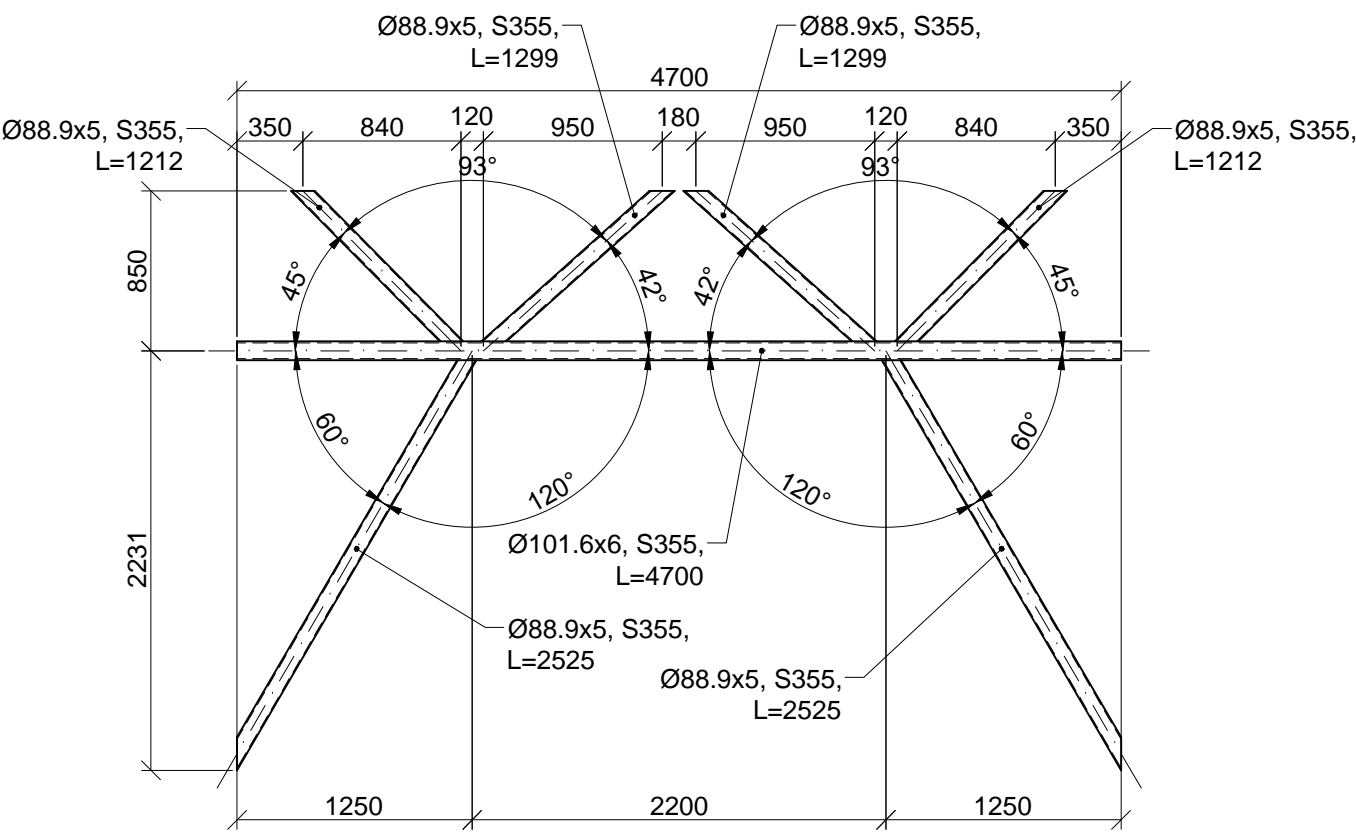

PERDANGOS DETALĖ MASTELIS 1:10

|                                                                           |
|---------------------------------------------------------------------------|
| Grindų danga - 20mm                                                       |
| Teptinė hidroizoliacija (drėgnose patalpose) - 1 sl.                      |
| Armuotas išlyginamasis sl., betonas C25/30, Ø4 S500 akutė 150x150 - 60 mm |
| Polietileno plėvelė 0.2 mm - 1 sl.                                        |
| Smūgio izoliacija PAROC SSB-1 - 20 mm                                     |
| Polistireninis putplastis EPS 100 - 50 mm                                 |
| Surenkamos g/b perdangos plokštės - 200 mm                                |

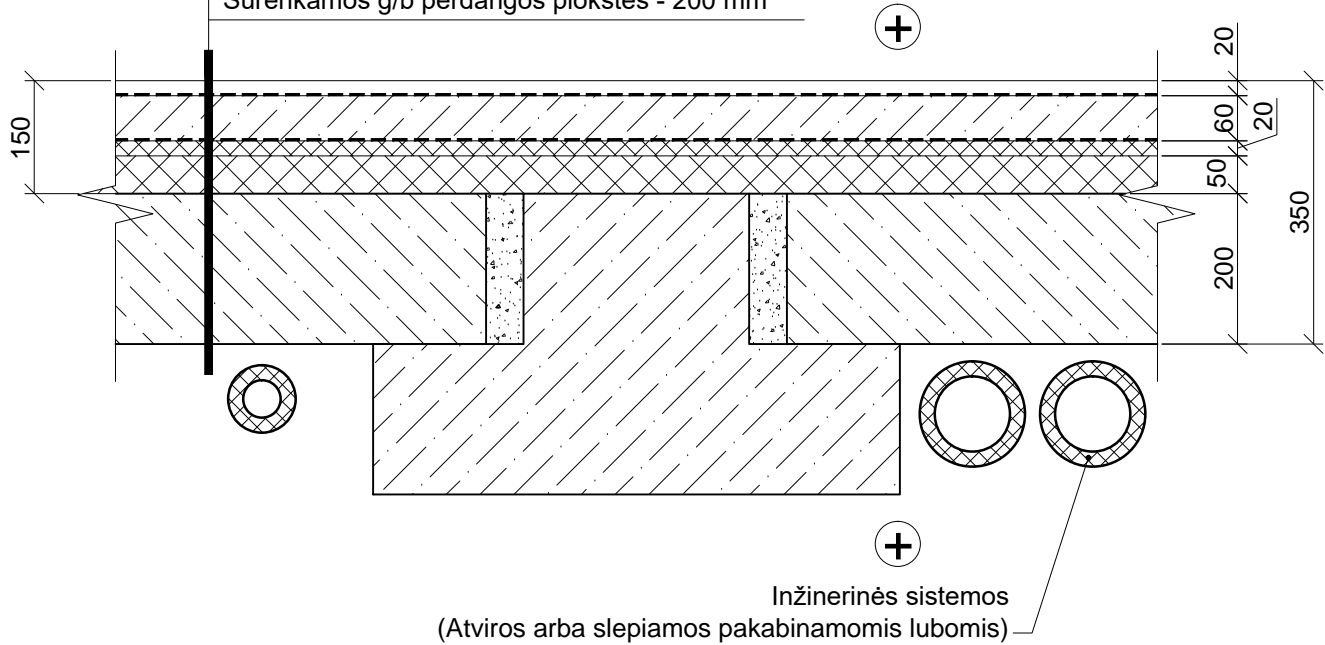

IŠORINĖS SIENOS SKYDO  
DETALĖ MASTELIS 1:10

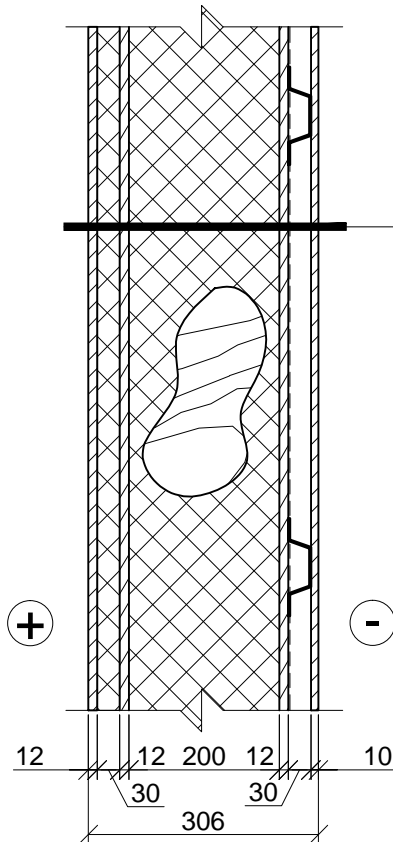

|                                                                                    |
|------------------------------------------------------------------------------------|
| Vidaus apdaila (gipso/kartono plokštė) - 12.5 mm                                   |
| Kingspan Therma TP10 (λd=0.023 W/m·K) - 30 mm                                      |
| OSB 3 plokštė - 12 mm                                                              |
| Putų poliuretanas (λd=0.022 W/m·K) tarp 50x200, C24 karkaso tašų, kas 600 - 200 mm |
| OSB 3 plokštė - 12 mm                                                              |
| Difuzinė plėvelė - 1 sl.                                                           |
| "Omega" skardiniai grebėstai fasado apdailai tvirtinti - 30 mm                     |
| Fasado apdaila cementinės plokštės - 10 mm                                         |

|                            |                                                                                                                   |                                                                                                                                       |         |                                               |                                                                                      |                       |       |        |
|----------------------------|-------------------------------------------------------------------------------------------------------------------|---------------------------------------------------------------------------------------------------------------------------------------|---------|-----------------------------------------------|--------------------------------------------------------------------------------------|-----------------------|-------|--------|
| KVAL.<br>PATV.<br>DOK. NR. |                                                                                                                   | UAB "Konstrukcijų pasaulis"                                                                                                           |         |                                               | STATINIO PROJEKTO PAVADINIMAS                                                        |                       |       |        |
|                            |                                                                                                                   | Jonavos g. 260, Kaunas<br>Įm. k.: 304690224<br>Tel. +370 (613) 98089<br>El.p.: k.pazereckas@gmail.com<br>www.konstrukciju-pasaulis.lt |         |                                               | Negyvenamasis 5 aukštų surenkamo gelžbetonio konstrukcijų mokslo paskirties pastatas |                       |       |        |
|                            |                                                                                                                   | 37603                                                                                                                                 | PDV     | Kęstutis Pažereckas                           | 2018 08                                                                              | DOKUMENTO PAVADINIMAS |       | LAI DA |
| 37603                      | Konstr.                                                                                                           | Kęstutis Pažereckas                                                                                                                   | 2018 08 | Atitvarų detalės;<br>Vertikalieji ryšiai VR-1 |                                                                                      | O                     |       |        |
|                            |                                                                                                                   |                                                                                                                                       |         |                                               |                                                                                      |                       |       |        |
| LT                         | UŽSAKOVAS                                                                                                         |                                                                                                                                       |         | BRĖŽINIO ŽYMUO                                |                                                                                      |                       | LAPAS | LAPŲ   |
|                            | Miškų institutas, Lietuvos agrarinių ir miškų mokslų centro filialas, Liepų g. 1, Girionių k., LT-53101, Kauno r. |                                                                                                                                       |         | KPRS18/02-TP-SK-3.16                          |                                                                                      |                       | 1     | 1      |



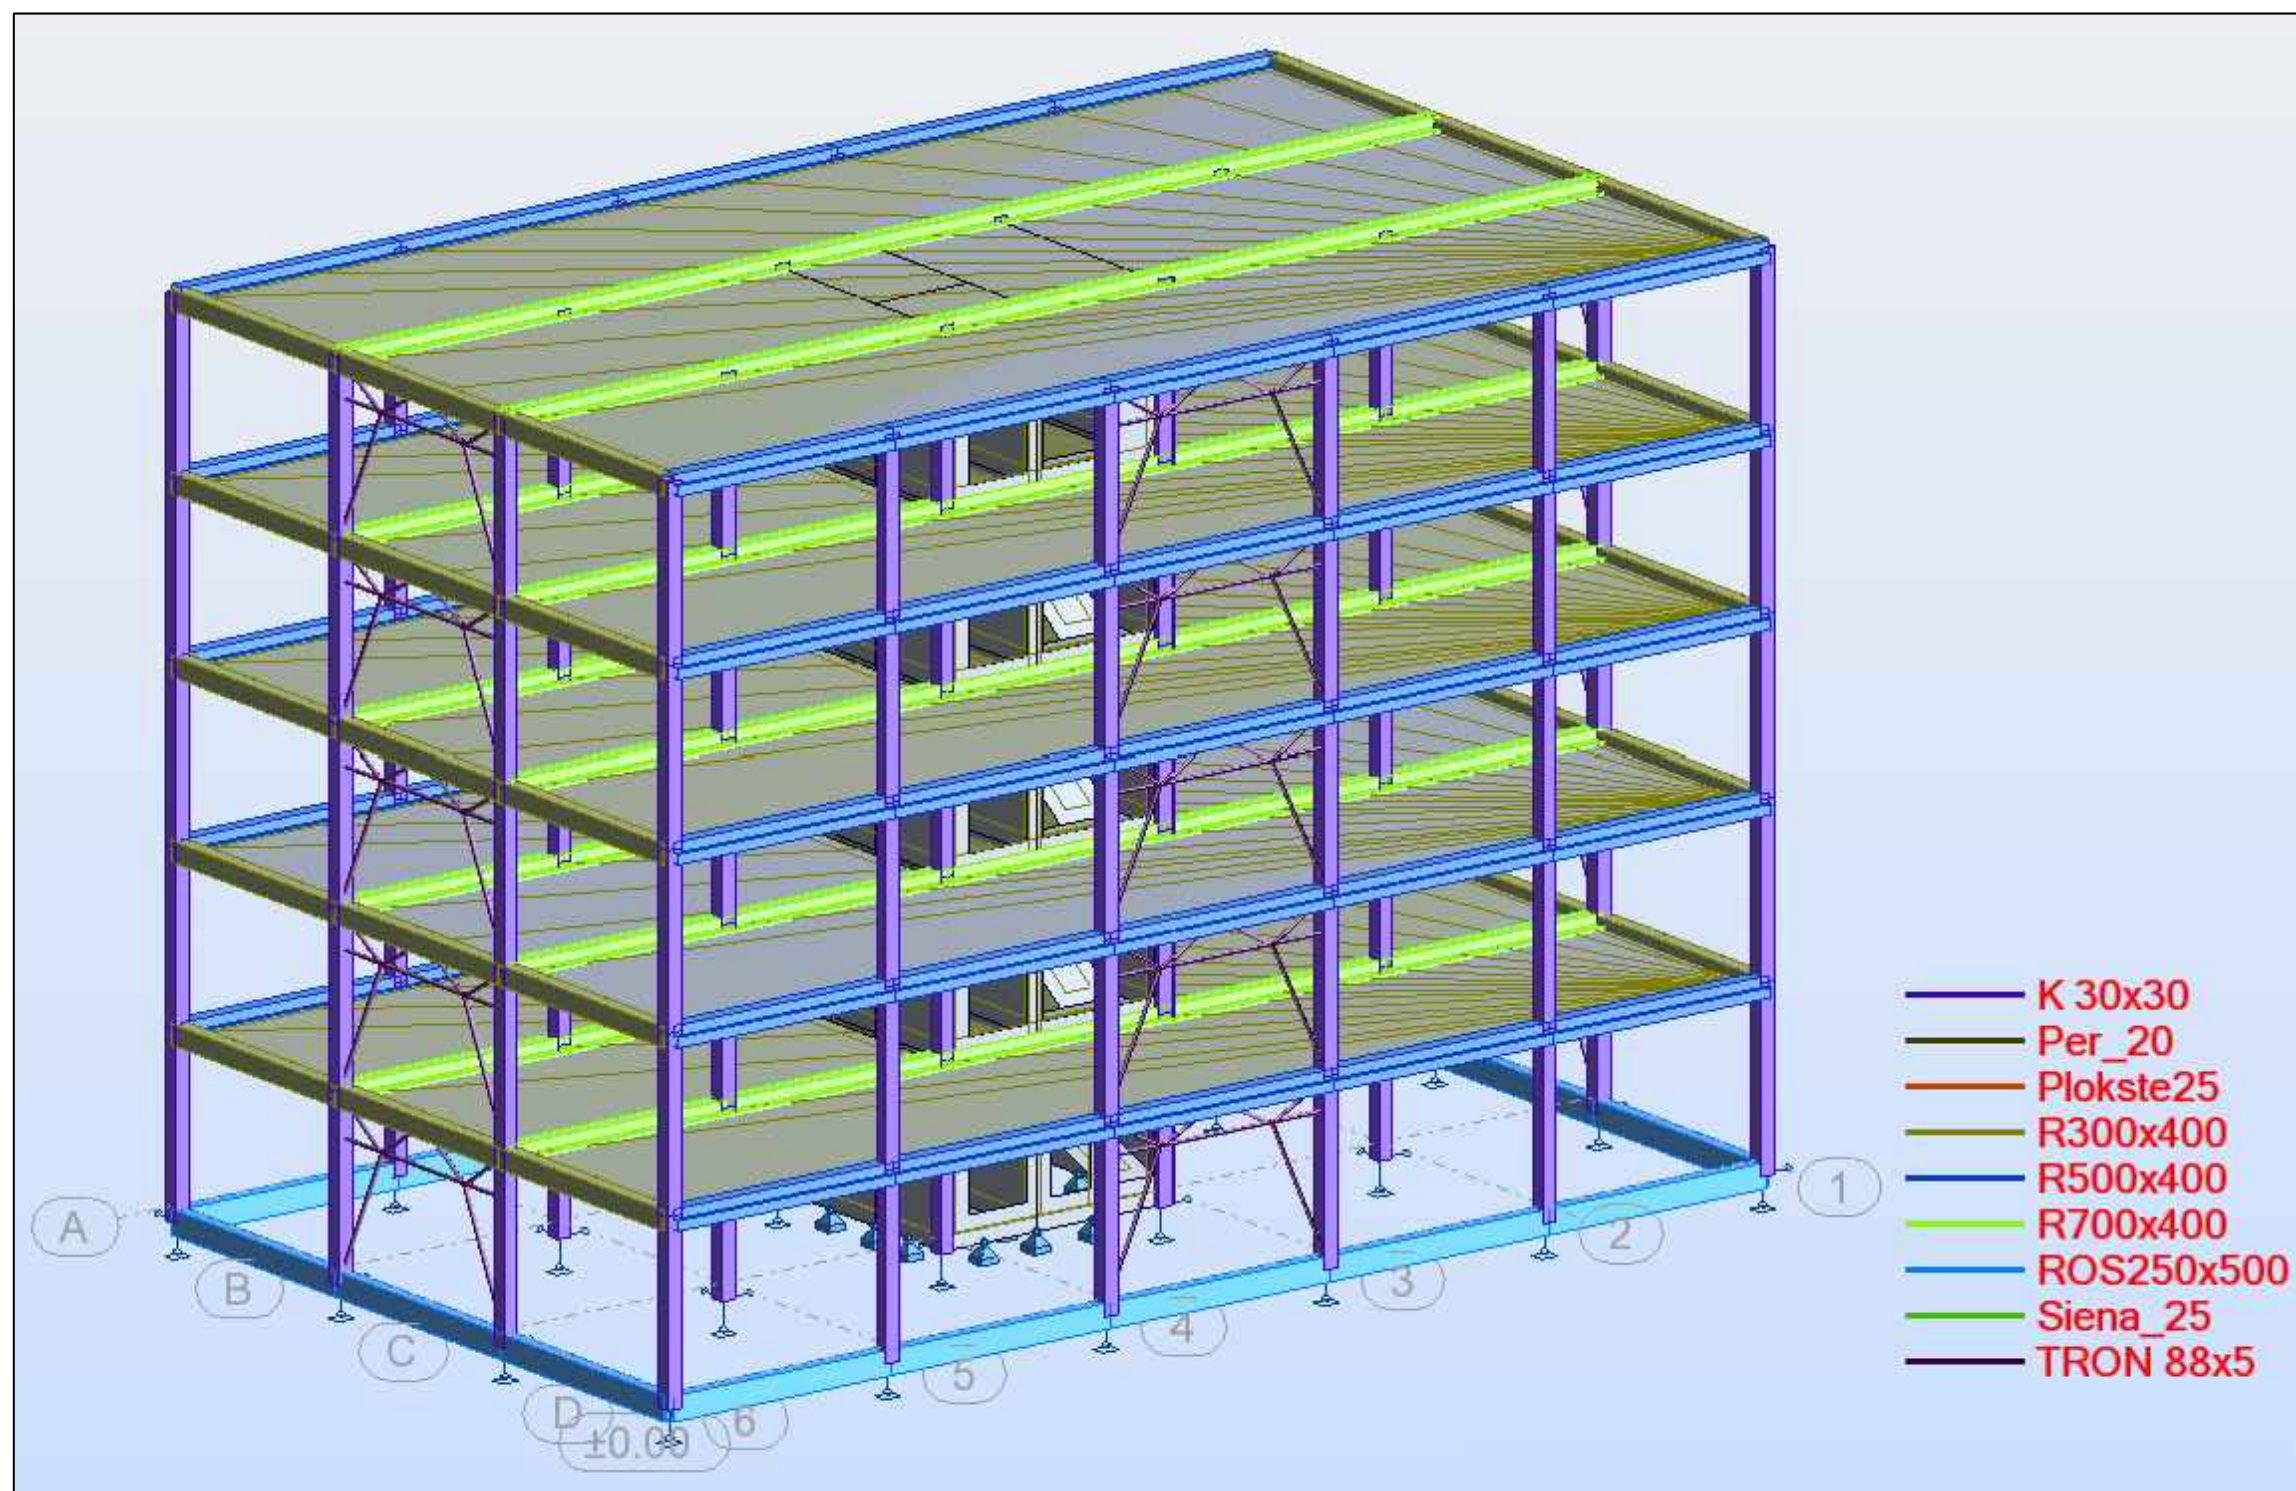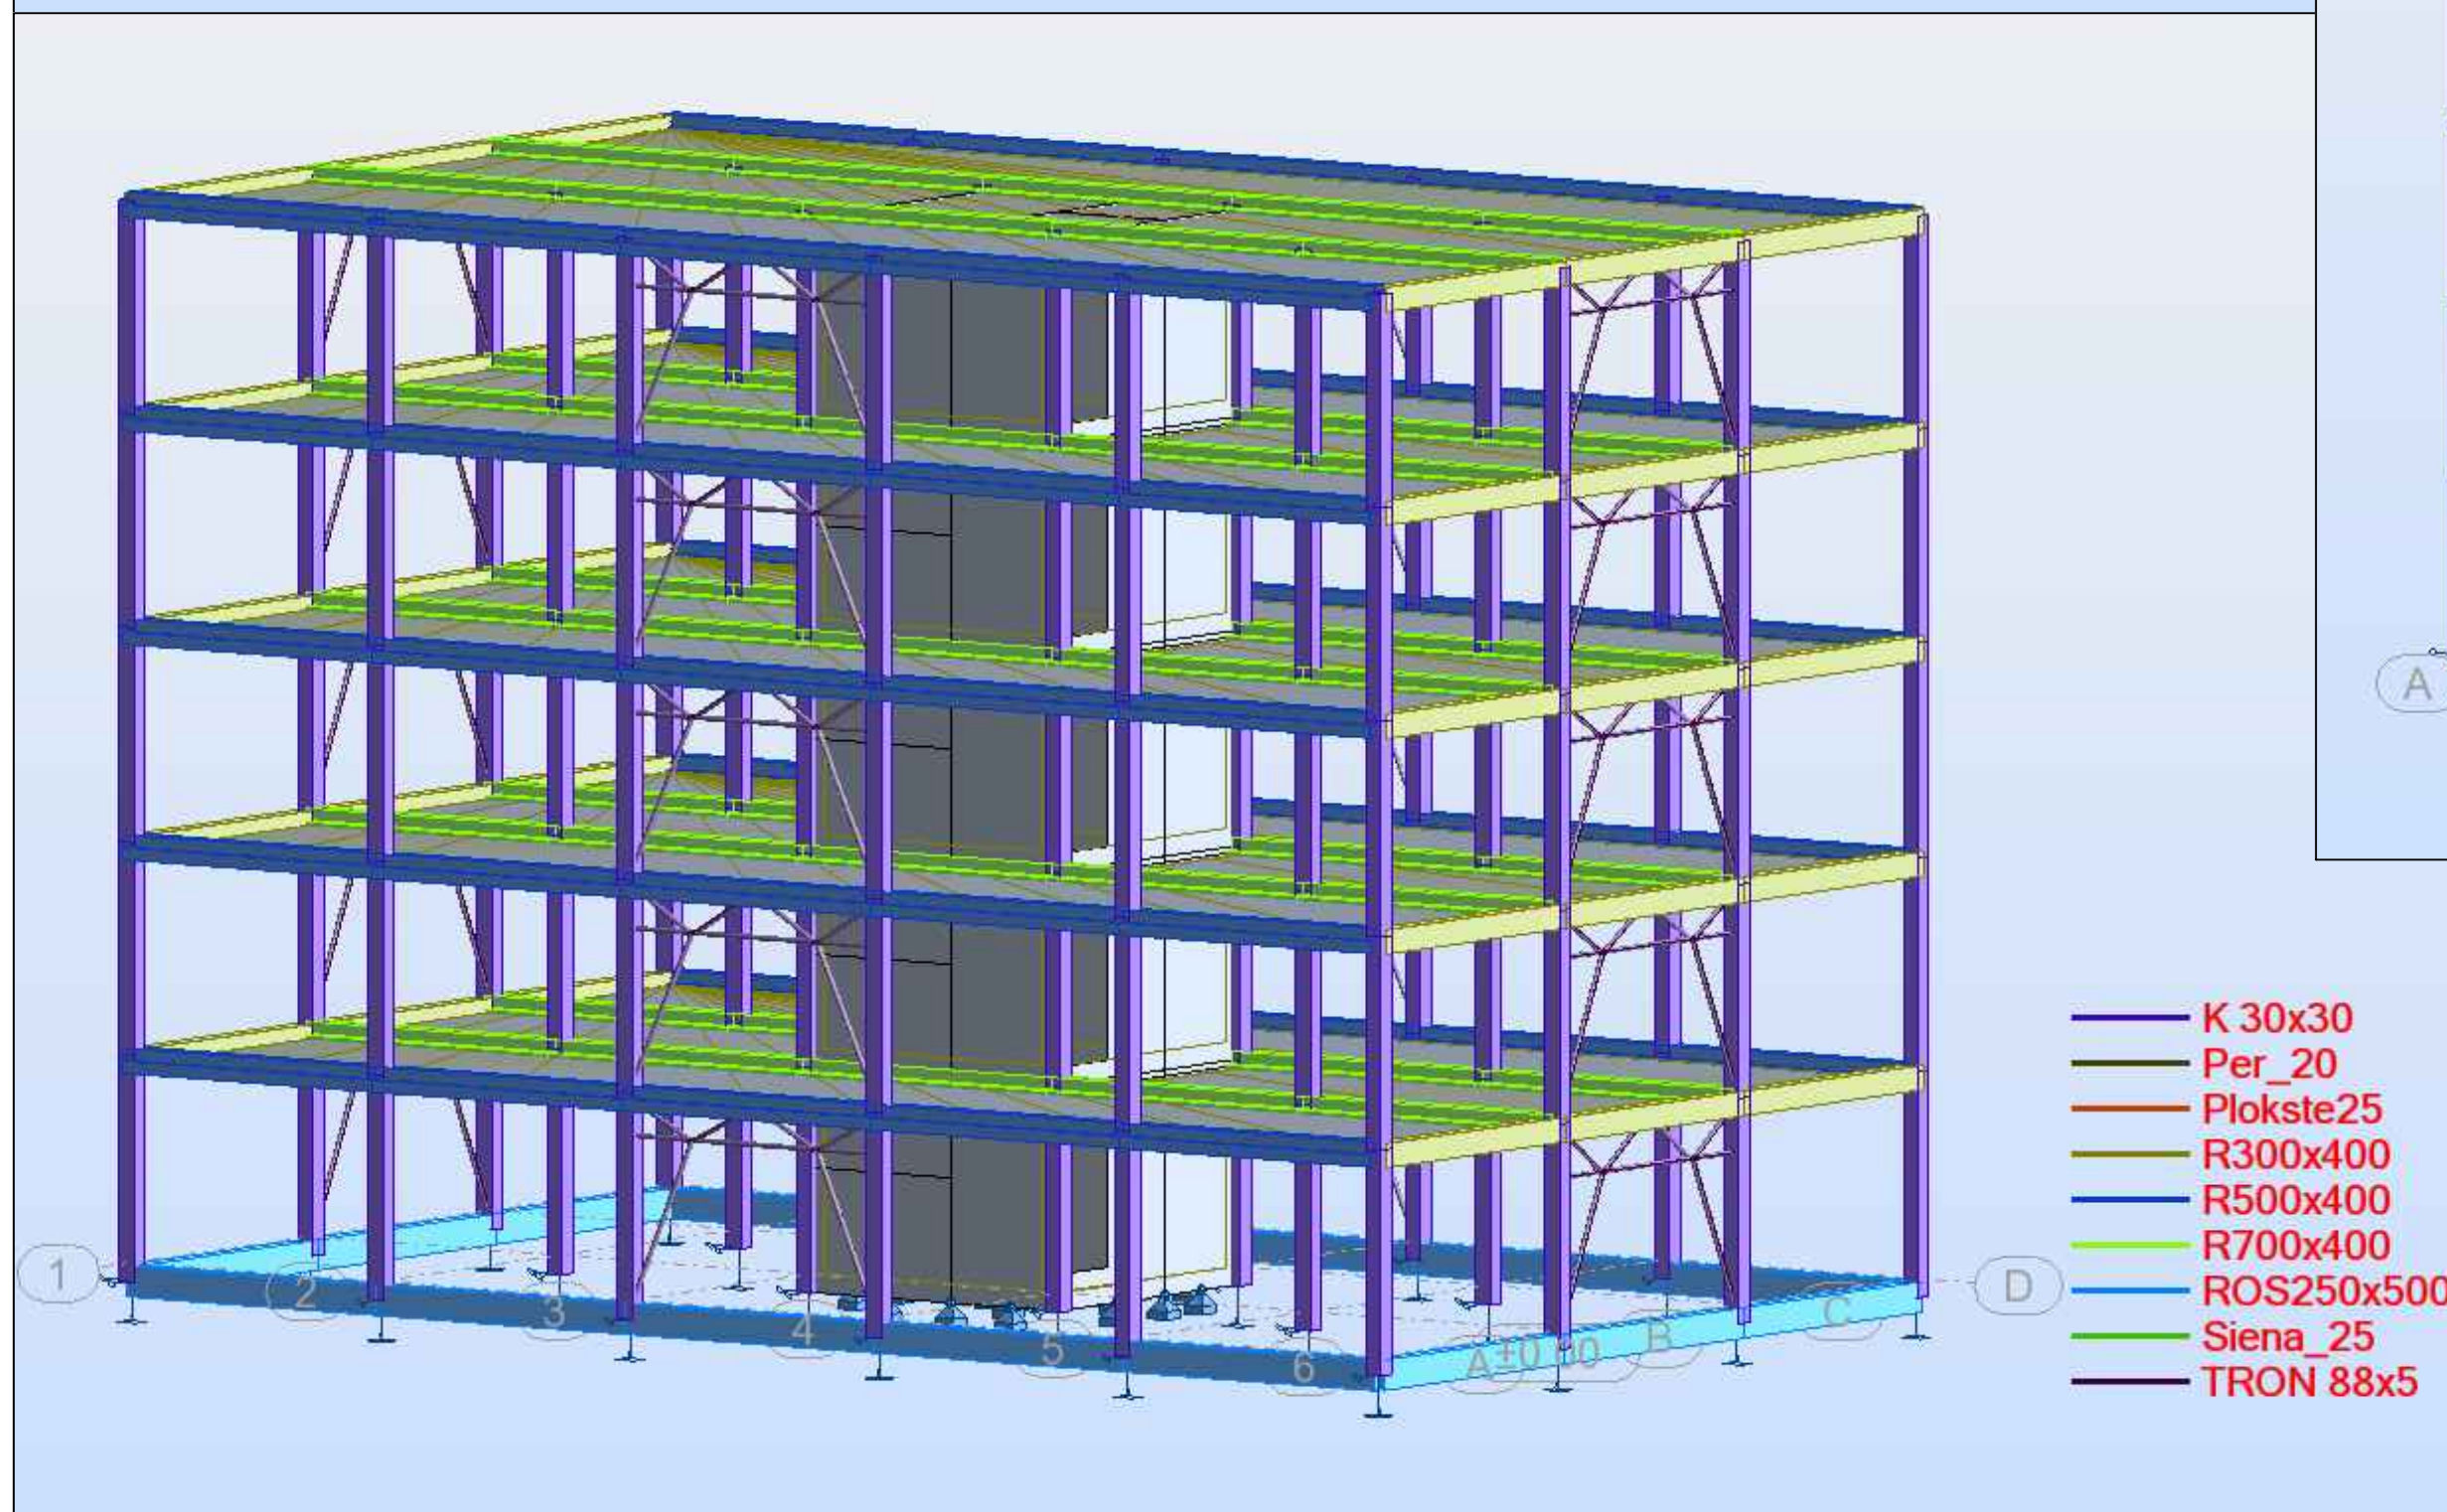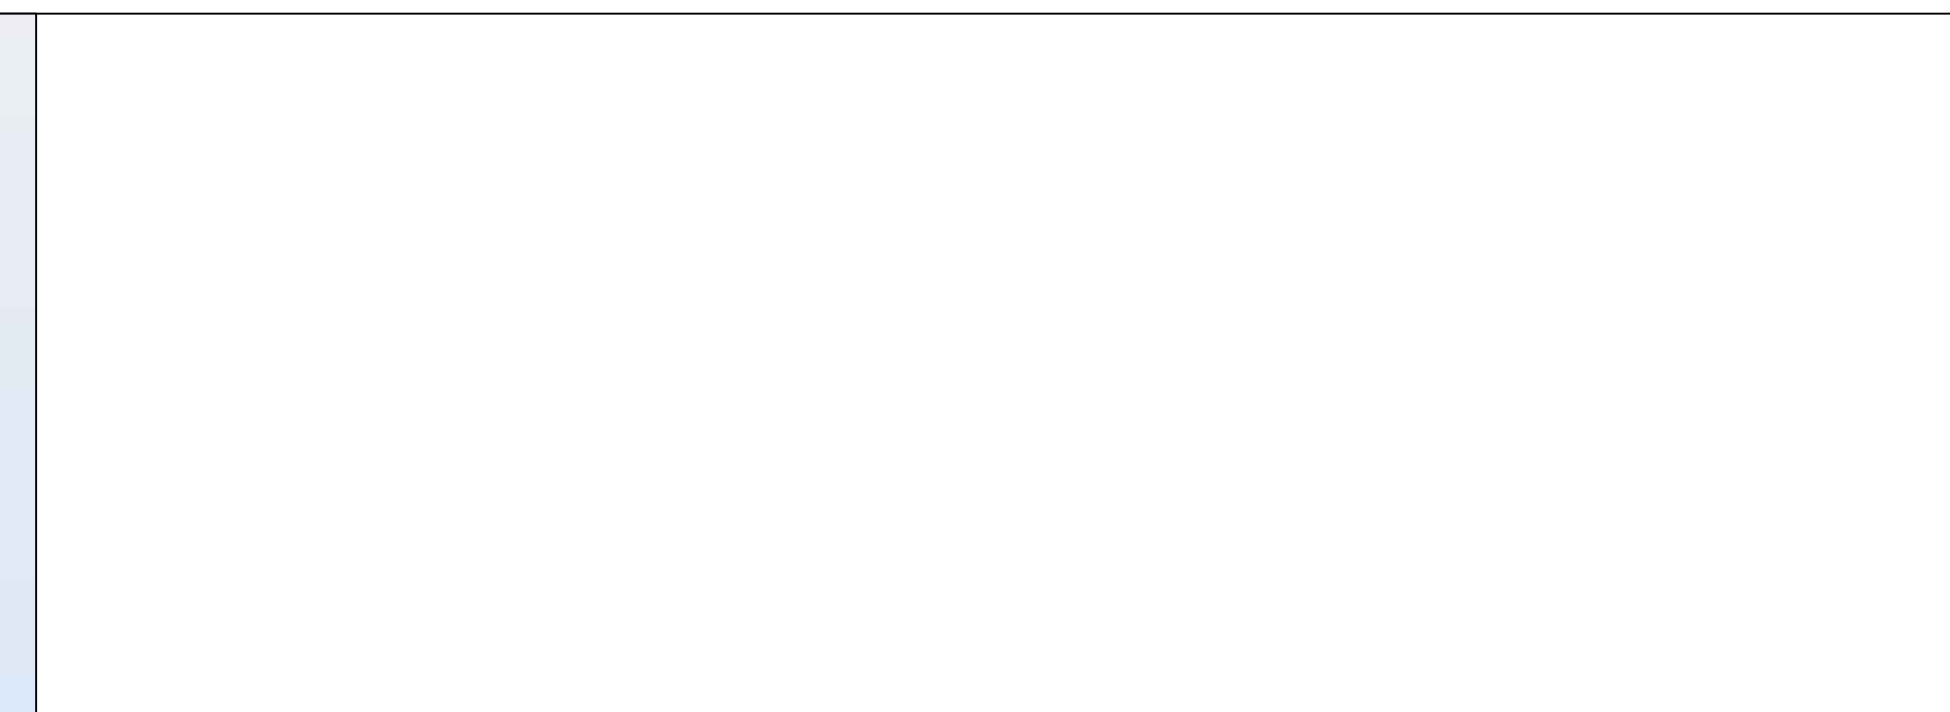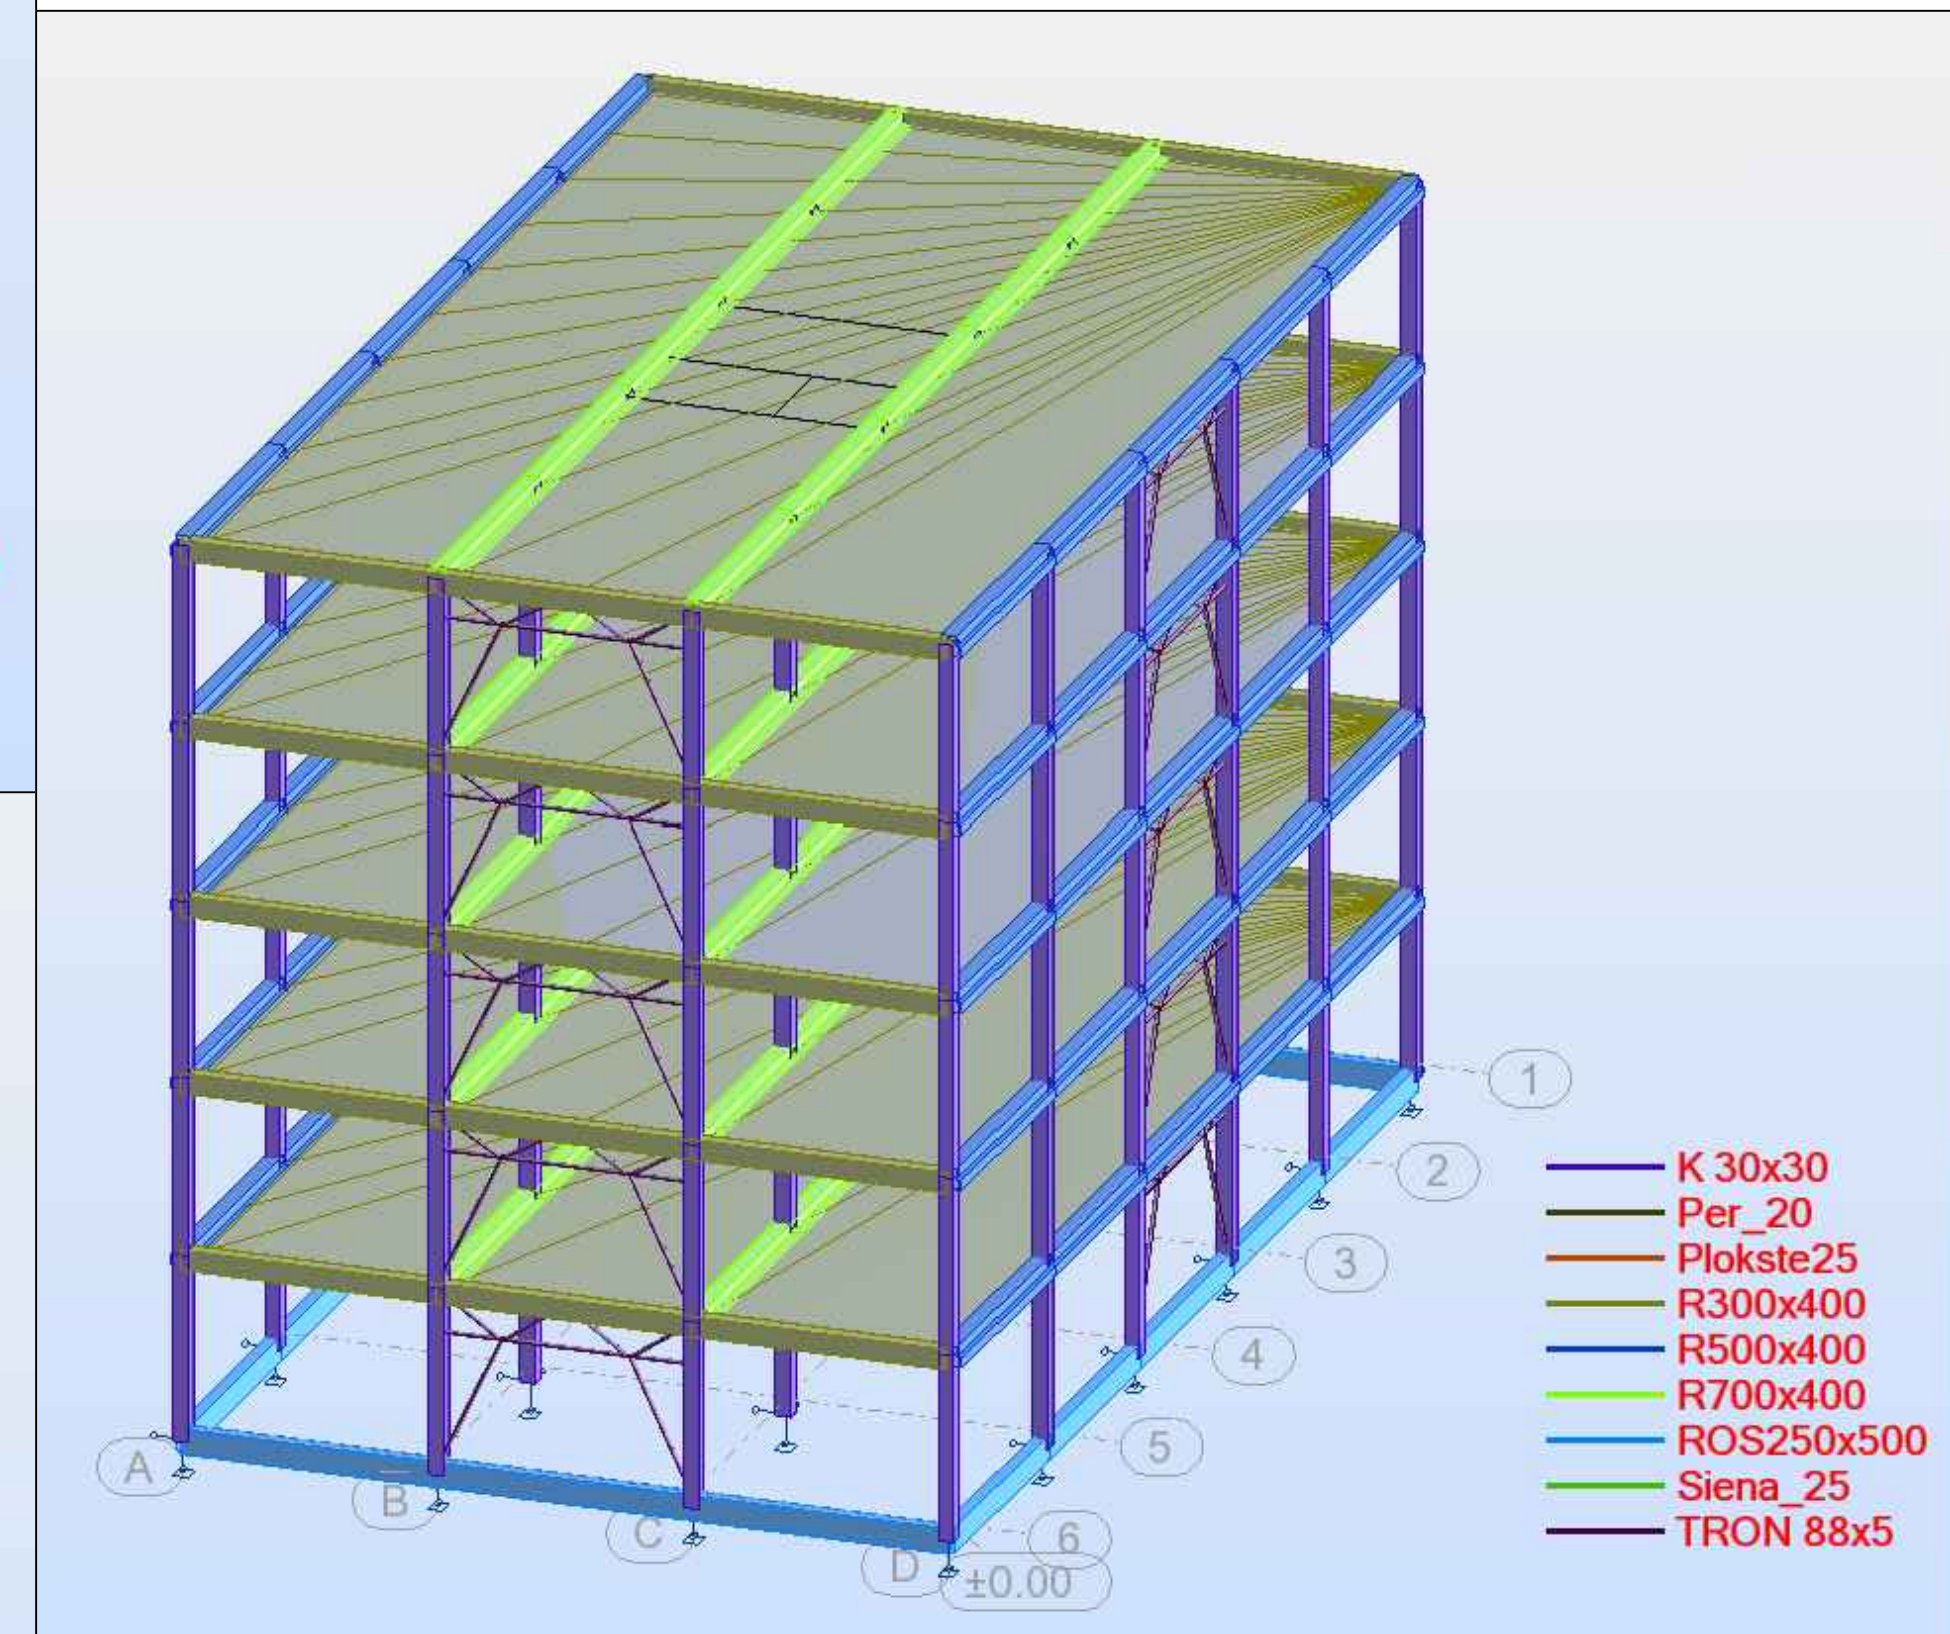

|                            |                                                                                                                   |                                                                                                                                       |         |                                                                                      |         |                                      |       |       |
|----------------------------|-------------------------------------------------------------------------------------------------------------------|---------------------------------------------------------------------------------------------------------------------------------------|---------|--------------------------------------------------------------------------------------|---------|--------------------------------------|-------|-------|
| KVAL.<br>PATV.<br>DOK. NR. |                              | UAB "Konstrukcijų pasaulis"                                                                                                           |         | STATINIO PROJEKTO PAVADINIMAS                                                        |         |                                      |       |       |
|                            |                                                                                                                   | Jonavos g. 260, Kaunas<br>Įm. k.: 304690224<br>Tel. +370 (613) 98089<br>El.p.: k.pazereckas@gmail.com<br>www.konstrukciju-pasaulis.lt |         | Negyvenamasis 5 aukštų surenkamo gelžbetonio konstrukcijų mokslo paskirties pastatas |         |                                      |       |       |
|                            |                                                                                                                   | 37603                                                                                                                                 | PDV     | Kęstutis Pažereckas                                                                  | 2018 08 | DOKUMENTO PAVADINIMAS                |       | LAIDA |
|                            |                                                                                                                   | 37603                                                                                                                                 | Konstr. | Kęstutis Pažereckas                                                                  | 2018 08 | Konstrukcinio modelio vizualizacijos |       |       |
|                            |                                                                                                                   |                                                                                                                                       |         |                                                                                      |         |                                      | O     |       |
| LT                         | UŽSAKOVAS                                                                                                         |                                                                                                                                       |         | BREŽINIO ŽYMUO                                                                       |         |                                      | LAPAS | LAPŲ  |
|                            | Miškų institutas, Lietuvos agrarinių ir miškų mokslų centro filialas, Liepų g. 1, Girionių k., LT-53101, Kauno r. |                                                                                                                                       |         | KPRS18/02-TP-SK-3.17                                                                 |         |                                      |       |       |
|                            |                                                                                                                   |                                                                                                                                       |         |                                                                                      |         |                                      | 1     | 1     |
