# Supplementary material for: Sustainability Impacts of Wood- and Concrete-Based Frame Buildings
Source: MDPI journal article supplement (doi:10.3390/su15021560), 2023-01-13
Supplement: s1 [file s1]

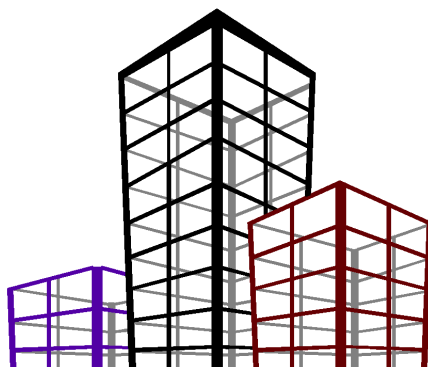

**UAB „KONSTRUKCIJŲ PASAULIS“**

Jonavos g. 260, Kaunas, LT-44131  
Įm. k.: 304690224. Tel.: +370 (613) 98089;  
el. p.: k.pazereckas@gmail.com  
www.konstrukciju-pasaulis.lt

|                               |                         |                                                                                                                   |       |
|-------------------------------|-------------------------|-------------------------------------------------------------------------------------------------------------------|-------|
| <b>Projekto pavadinimas</b>   |                         | <b>Negyvenamasis 2 aukštų klijuotosios medienos konstrukcijų mokslo paskirties pastatas</b>                       |       |
| Užsakovas                     |                         | Miškų institutas, Lietuvos agrarinių ir miškų mokslų centro filialas. Liepų g. 1, Girionių k., LT-53101, Kauno r. |       |
| Statybos rūšis                |                         | Nauja statyba                                                                                                     |       |
| Naudojimo paskirtis           |                         | Negyvenamoji (mokslo paskirties)                                                                                  |       |
| Kategorija                    |                         | Ypatingas                                                                                                         |       |
| Projekto etapas               |                         | Techninis projektas (TP)                                                                                          |       |
| <b>Projekto dalis / žymuo</b> |                         | <b>Konstrukcijų dalis KPRS18/02-TP-SK</b>                                                                         |       |
| UAB Konstrukcijų pasaulis     | Direktorius             | Kęstutis Pažereckas                                                                                               |       |
|                               | Projekto dalies vadovas | Kęstutis Pažereckas                                                                                               | 37603 |
|                               | Projektuotojas          | Kęstutis Pažereckas                                                                                               | 37603 |

Kaunas 2018 m.

**2. DOKUMENTŲ ŽINIARAŠTIS****2.1. Projekto dalies bylos (segtuvo) dokumentų sudėties žiniaraštis**

| Dokumento žymuo      | Lapų sk. | Laida | Dokumento pavadinimas                                      | Pastabos |
|----------------------|----------|-------|------------------------------------------------------------|----------|
| KPRS18/02-TP-SK-DŽ   | 1        | 0     | Dokumentų sudėties žiniaraštis                             |          |
| KPRS18/02-TP-SK-2.1  | 1        | 0     | Polių skaičiuotinių apkrovų planas                         |          |
| KPRS18/02-TP-SK-2.2  | 1        | 0     | Polių charakteristinių apkrovų planas                      |          |
| KPRS18/02-TP-SK-2.3  | 1        | 0     | Polių pamatų planas                                        |          |
| KPRS18/02-TP-SK-2.4  | 1        | 0     | Polių galvenų ir rostverkų planas                          |          |
| KPRS18/02-TP-SK-2.5  | 1        | 0     | Polių galvenos                                             |          |
| KPRS18/02-TP-SK-2.6  | 1        | 0     | Rostverkai                                                 |          |
| KPRS18/02-TP-SK-2.7  | 1        | 0     | Pirmo aukšto planas                                        |          |
| KPRS18/02-TP-SK-2.8  | 1        | 0     | Kolonos tvirtinimo su pamatu ir ryšiu mazgas               |          |
| KPRS18/02-TP-SK-2.9  | 1        | 0     | Pirmo aukšto perdangos sijų planas                         |          |
| KPRS18/02-TP-SK-2.10 | 1        | 0     | Pirmo aukšto perdangos ilginių (paskirstomųjų sijų) planas |          |
| KPRS18/02-TP-SK-2.11 | 1        | 0     | Antro aukšto planas                                        |          |
| KPRS18/02-TP-SK-2.12 | 1        | 0     | Denginio sijų planas                                       |          |
| KPRS18/02-TP-SK-2.13 | 1        | 0     | Denginio ilginių (paskirstomųjų sijų) planas               |          |
| KPRS18/02-TP-SK-2.14 | 1        | 0     | Pjūvis A-A                                                 |          |
| KPRS18/02-TP-SK-2.15 | 1        | 0     | Pjūvis B-B                                                 |          |
| KPRS18/02-TP-SK-2.16 | 1        | 0     | Atitvarų detalės                                           |          |
| KPRS18/02-TP-SK-2.17 | 1        | 0     | Vertikalieji ryšiai VR-1                                   |          |
| KPRS18/02-TP-SK-2.18 | 1        | 0     | Konstrukcinio modelio vizualizacijos                       |          |

|                               |                                                                                                                                |                                                                                                                                                                       |         |                                                                                                                       |  |        |
|-------------------------------|--------------------------------------------------------------------------------------------------------------------------------|-----------------------------------------------------------------------------------------------------------------------------------------------------------------------|---------|-----------------------------------------------------------------------------------------------------------------------|--|--------|
| KVAL.<br>PATV.<br>DOK.<br>NR. | 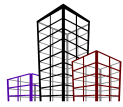                                            | UAB „Konstrukcijų pasaulis“<br>Jonavos g. 260, Kaunas.<br>Įm. k.: 304690224.<br>Tel. +370 (613) 98089<br>el.p. k.pazereckas@gmail.com<br>www.konstrukciju-pasaulis.lt |         | STATINIO PROJEKTO PAVADINIMAS<br>Negyvenamasis 2 aukštų klijuotosios medienos konstrukcijų mokslo paskirties pastatas |  |        |
| 37603                         | PDV                                                                                                                            | K. Pažereckas                                                                                                                                                         | 2018 08 | DOKUMENTO PAVADINIMAS<br>Dokumentų žiniaraštis                                                                        |  | LAI DA |
| 37603                         | Konstr.                                                                                                                        | K. Pažereckas                                                                                                                                                         | 2018 08 |                                                                                                                       |  | 0      |
| LT                            | UŽSAKOVAS<br>Miškų institutas, Lietuvos agrarinių ir miškų mokslų centro filialas. Liepų g. 1, Girionių k., LT-53101, Kauno r. |                                                                                                                                                                       |         | DOKUMENTO ŽYMUO<br>KPRS18/02-TP-SK-DŽ                                                                                 |  | LAPAS  |
|                               |                                                                                                                                |                                                                                                                                                                       |         |                                                                                                                       |  | LAPŲ   |
|                               |                                                                                                                                |                                                                                                                                                                       |         |                                                                                                                       |  | 1      |
|                               |                                                                                                                                |                                                                                                                                                                       |         |                                                                                                                       |  | 1      |

POLIŲ SKAIČIUOTINIŲ APKROVŲ PLANAS MASTELIS 1:100

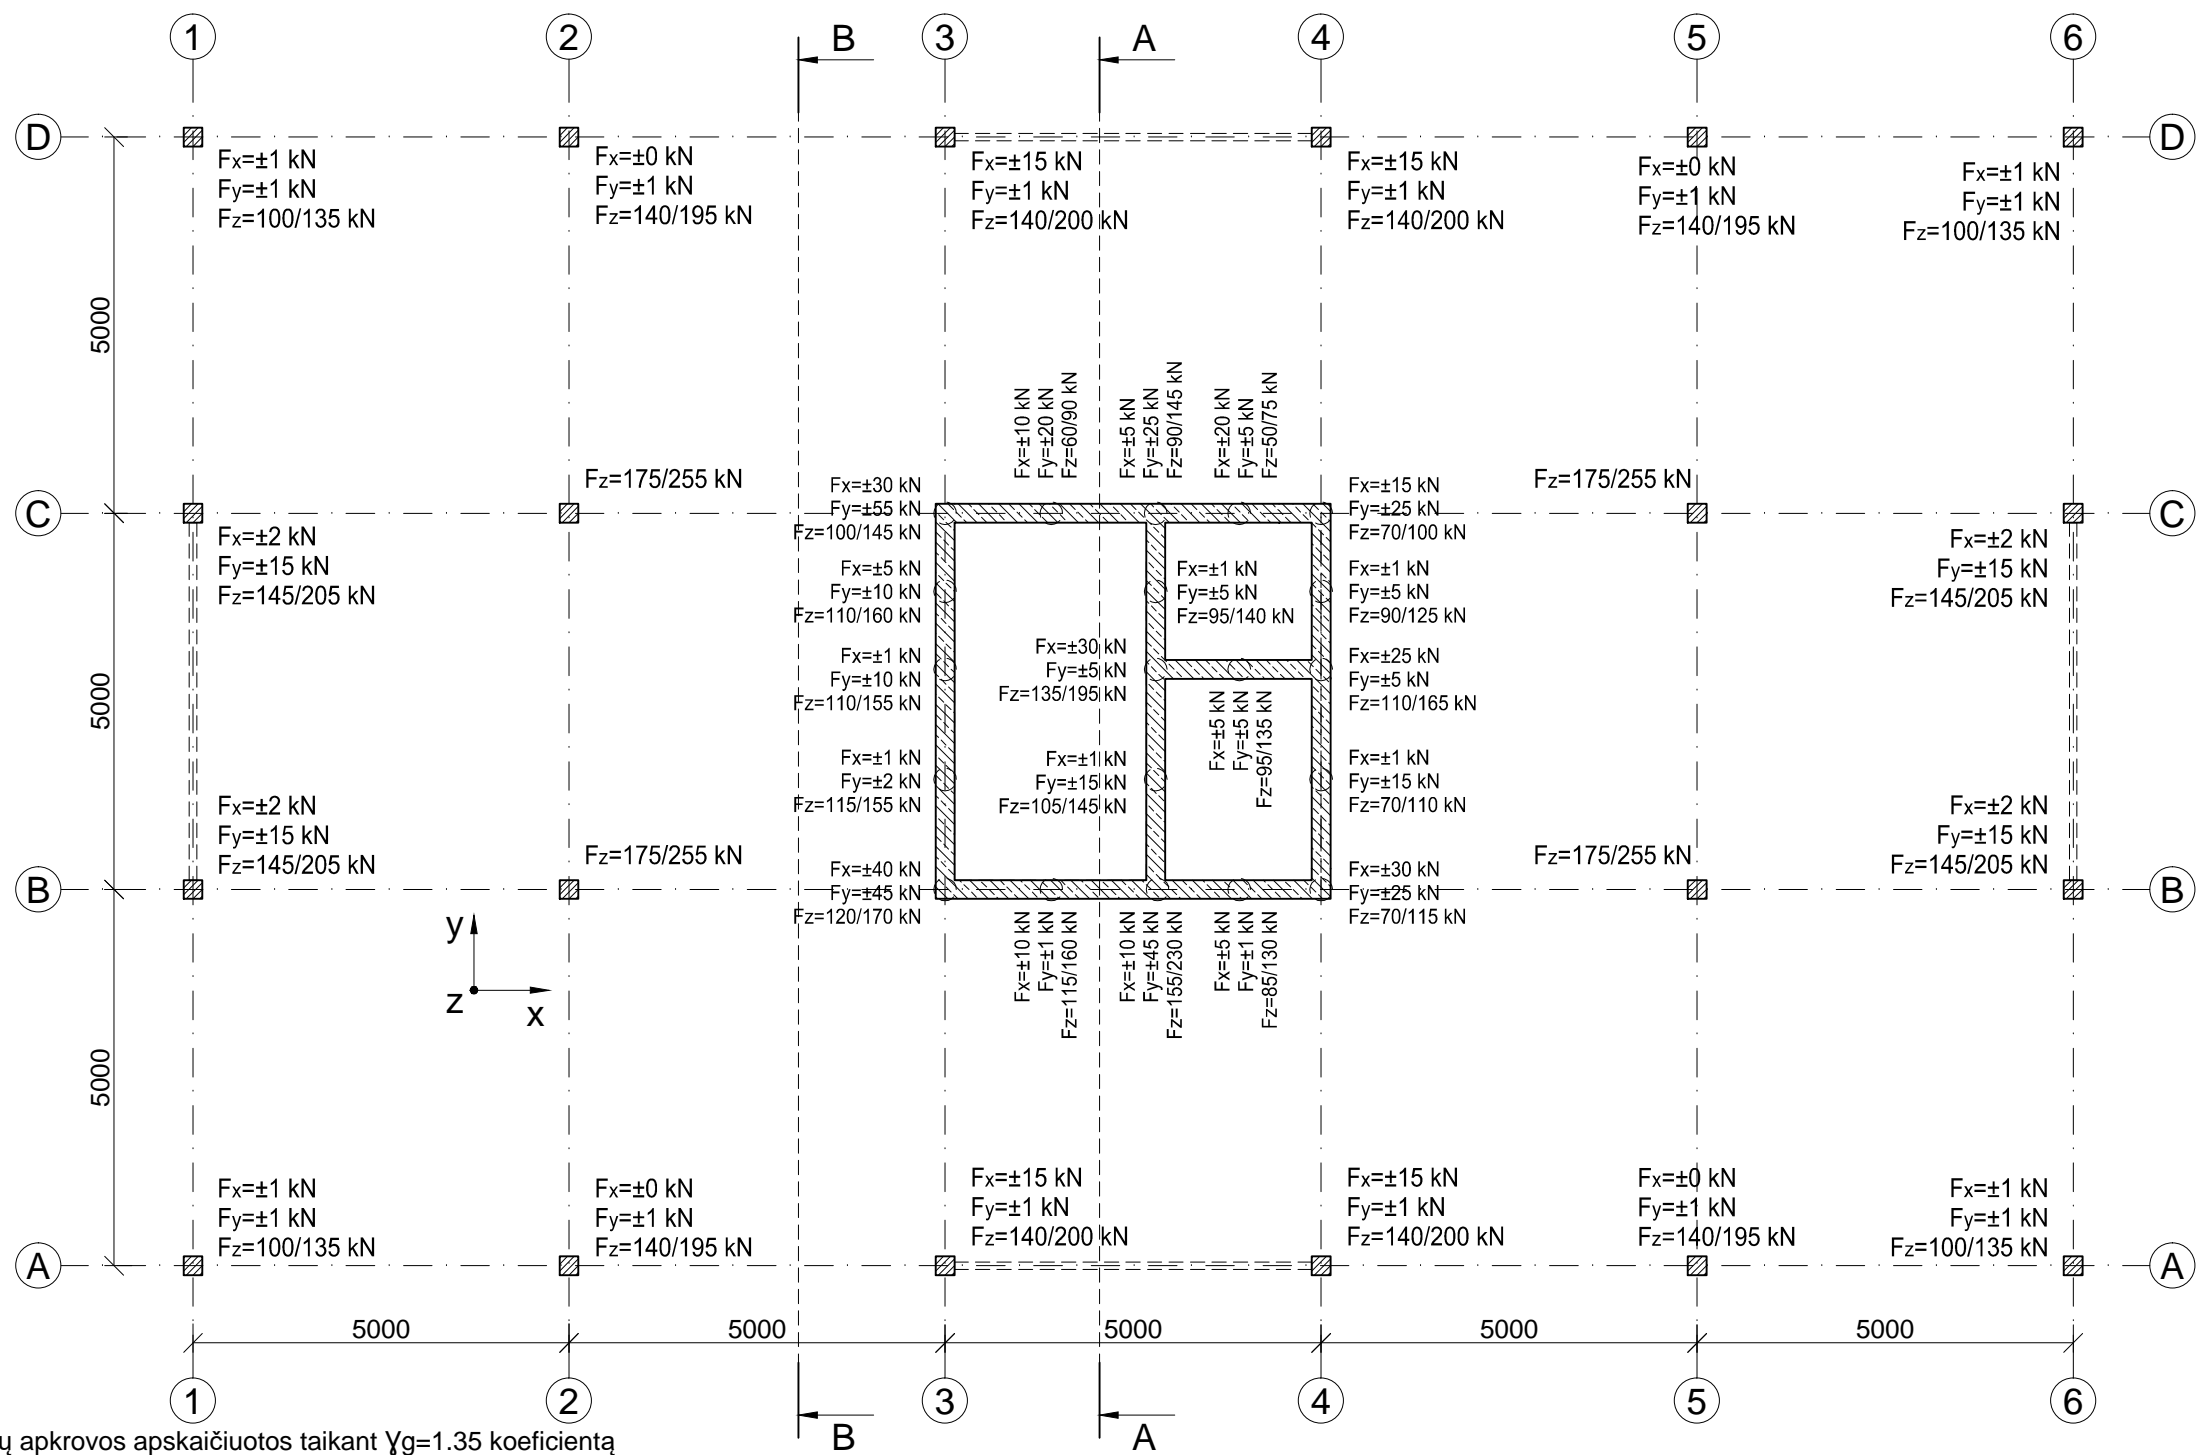

- PASTABOS:
1. Skaičiuojamosios pamatų apkrovos apskaičiuotos taikant  $\gamma_g=1.35$  koeficientą nuolatinėms apkrovoms,  $\gamma_q=\gamma_s=\gamma_w=1.30$  kintamoms (naudojimo, sniego ir vėjo) apkrovoms.
  2. Polinių pamatų ir polių galvenų svoris neįvertintas.
  3. Polinių pamatų skaičiuotiniai svoriai:
    - 2,0m poliaus - 5.0 kN
    - 3,0m poliaus - 7.0 kN
    - 3,5m poliaus - 8.5 kN
    - 4,0m poliaus - 9.5 kN
    - 4,5m poliaus - 10.5 kN
    - 5,0m poliaus - 12.0 kN
    - 6,5m poliaus - 15.5 kN
    - 7,5m poliaus - 18.0 kN
    - 9,0m poliaus - 21.5 kN
  4. Polių galvenų skaičiuotiniai svoriai:
    - PG-1 galvena - 29.5 kN
    - PG-2 galvena - 28.5 kN
    - PG-3 galvena - 4.5 kN

|                            |         |                                                                                                                                       |         |                                                                                                                   |  |       |
|----------------------------|---------|---------------------------------------------------------------------------------------------------------------------------------------|---------|-------------------------------------------------------------------------------------------------------------------|--|-------|
| KVAL.<br>PATV.<br>DOK. NR. |         | UAB "Konstrukcijų pasaulis"                                                                                                           |         | STATINIO PROJEKTO PAVADINIMAS                                                                                     |  |       |
|                            |         | Jonavos g. 260, Kaunas<br>Įm. k.: 304690224<br>Tel. +370 (613) 98089<br>El.p.: k.pazereckas@gmail.com<br>www.konstrukciju-pasaulis.lt |         | Negyvenamasis 2 aukštų klijuotosios medienos konstrukcijų mokslo paskirties pastatas                              |  |       |
|                            |         |                                                                                                                                       |         |                                                                                                                   |  |       |
| 37603                      | PDV     | Kęstutis Pažereckas                                                                                                                   | 2018 08 | DOKUMENTO PAVADINIMAS                                                                                             |  | LAIDA |
| 37603                      | Konstr. | Kęstutis Pažereckas                                                                                                                   | 2018 08 | Polių skaičiuotinių apkrovų planas                                                                                |  | O     |
|                            |         |                                                                                                                                       |         | BRĖŽINIO ŽYMUO                                                                                                    |  | LAPAS |
| LT                         |         |                                                                                                                                       |         | UŽSAKOVAS                                                                                                         |  | LAPŲ  |
|                            |         |                                                                                                                                       |         | Miškų institutas, Lietuvos agrarinių ir miškų mokslų centro filialas, Liepų g. 1, Girionių k., LT-53101, Kauno r. |  |       |
|                            |         |                                                                                                                                       |         | KPRS18/02-TP-SK-2.1                                                                                               |  | 1     |
|                            |         |                                                                                                                                       |         |                                                                                                                   |  | 1     |

POLIŲ CHARAKTERISTINIŲ APKROVŲ PLANAS MASTELIS 1:100

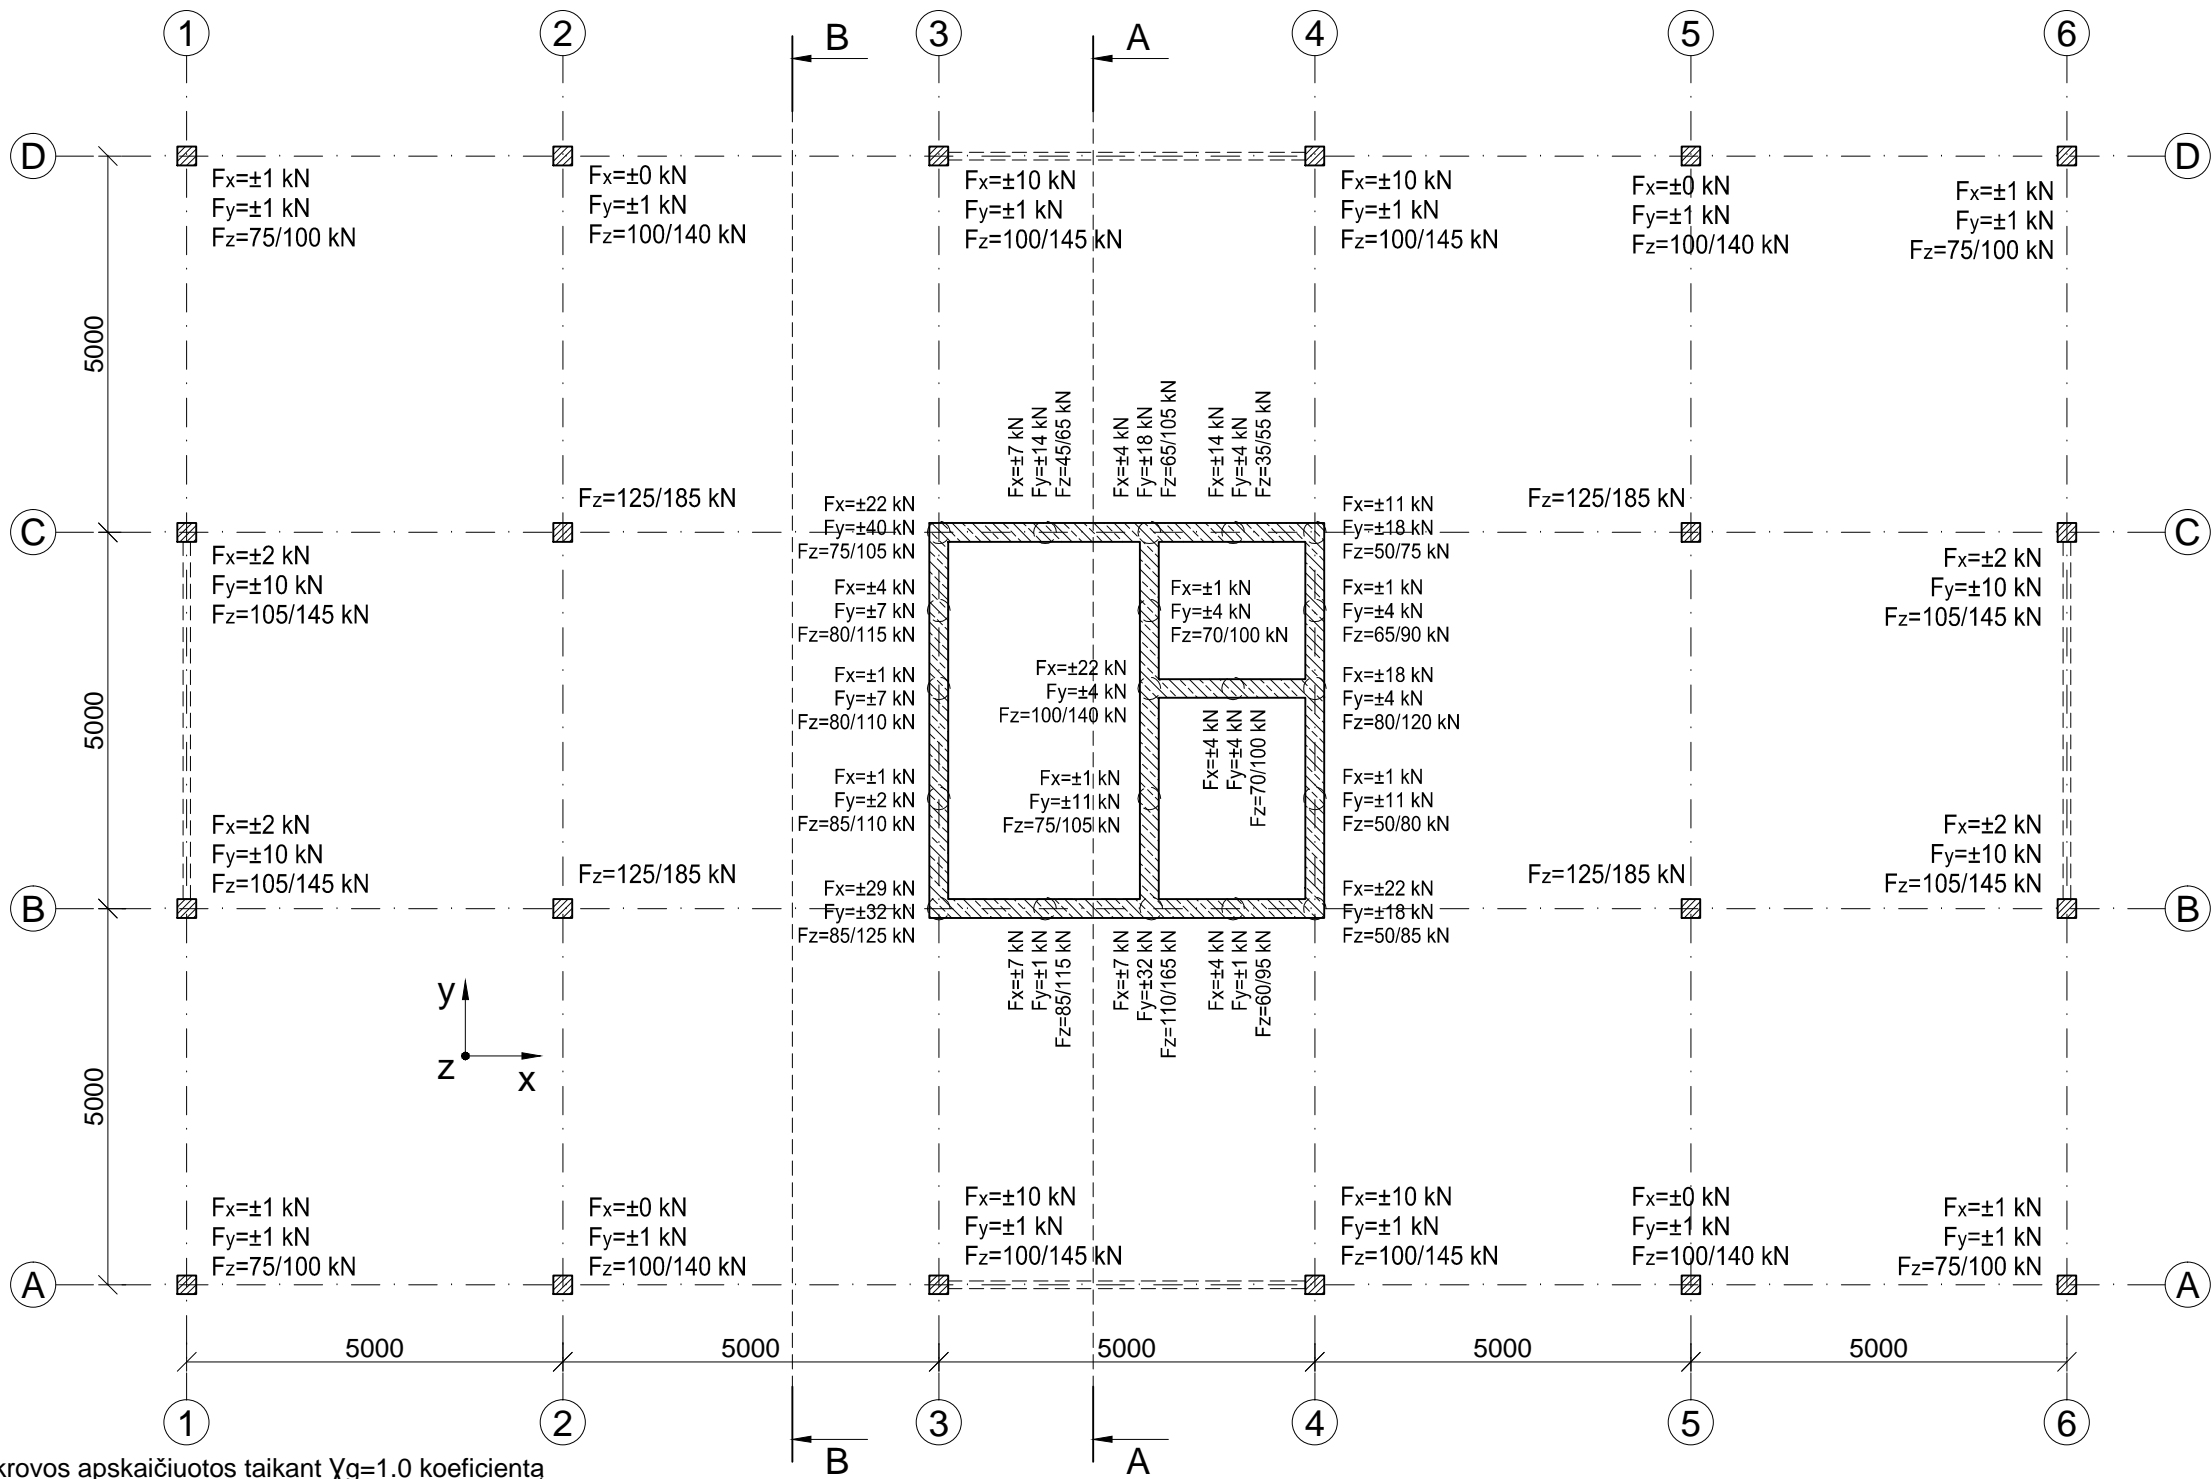

PASTABOS:

1. Charakteristinės pamatų apkrovos apskaičiuotos taikant  $\gamma_g=1.0$  koeficientą nuolatinėms apkrovoms,  $\gamma_q=\gamma_s=\gamma_w=1.00$  kintamoms (naudojimo, sniego ir vėjo) apkrovoms.
2. Polinių pamatų ir polių galvenų svoris neįvertintas.
3. Polinių pamatų charakteristiniai svoriai:
- 2,0m poliaus - 4.0 kN
  - 3,0m poliaus - 5.5 kN
  - 3,5m poliaus - 6.5 kN
  - 4,0m poliaus - 7.0 kN
  - 4,5m poliaus - 8.0 kN
  - 5,0m poliaus - 9.0 kN
  - 6,5m poliaus - 11.5 kN
  - 7,5m poliaus - 13.5 kN
  - 9,0m poliaus - 16.0 kN
4. Polių galvenų charakteristiniai svoriai:
- PG-1 galvena - 22.0 kN
  - PG-2 galvena - 21.0 kN
  - PG-3 galvena - 3.5 kN

|                            |                                                                                                                                |                                                                                                                                                                      |         |                                                                                                                       |  |       |      |
|----------------------------|--------------------------------------------------------------------------------------------------------------------------------|----------------------------------------------------------------------------------------------------------------------------------------------------------------------|---------|-----------------------------------------------------------------------------------------------------------------------|--|-------|------|
| KVAL.<br>PATV.<br>DOK. NR. |                                           | UAB "Konstrukcijų pasaulis"<br>Jonavos g. 260, Kaunas<br>Įm. k.: 304690224<br>Tel. +370 (613) 98089<br>El.p.: k.pazereckas@gmail.com<br>www.konstrukciju-pasaulis.lt |         | STATINIO PROJEKTO PAVADINIMAS<br>Negyvenamasis 2 aukštų klijuotosios medienos konstrukcijų mokslo paskirties pastatas |  |       |      |
| 37603                      | PDV                                                                                                                            | Kęstutis Pažereckas                                                                                                                                                  | 2018 08 | DOKUMENTO PAVADINIMAS<br>Polii charakteristinių apkrovų planas                                                        |  | LAIDA |      |
| 37603                      | Konstr.                                                                                                                        | Kęstutis Pažereckas                                                                                                                                                  | 2018 08 |                                                                                                                       |  | O     |      |
|                            |                                                                                                                                |                                                                                                                                                                      |         |                                                                                                                       |  |       |      |
| LT                         | UŽSAKOVAS<br>Miškų institutas, Lietuvos agrarinių ir miškų mokslų centro filialas, Liepų g. 1, Girionių k., LT-53101, Kauno r. |                                                                                                                                                                      |         | BRĖŽINIO ŽYMUO<br>KPRS18/02-TP-SK-2.2                                                                                 |  | LAPAS | LAPŲ |
|                            |                                                                                                                                |                                                                                                                                                                      |         |                                                                                                                       |  | 1     | 1    |

POLINIŲ PAMATŲ PLANAS MASTELIS 1:100

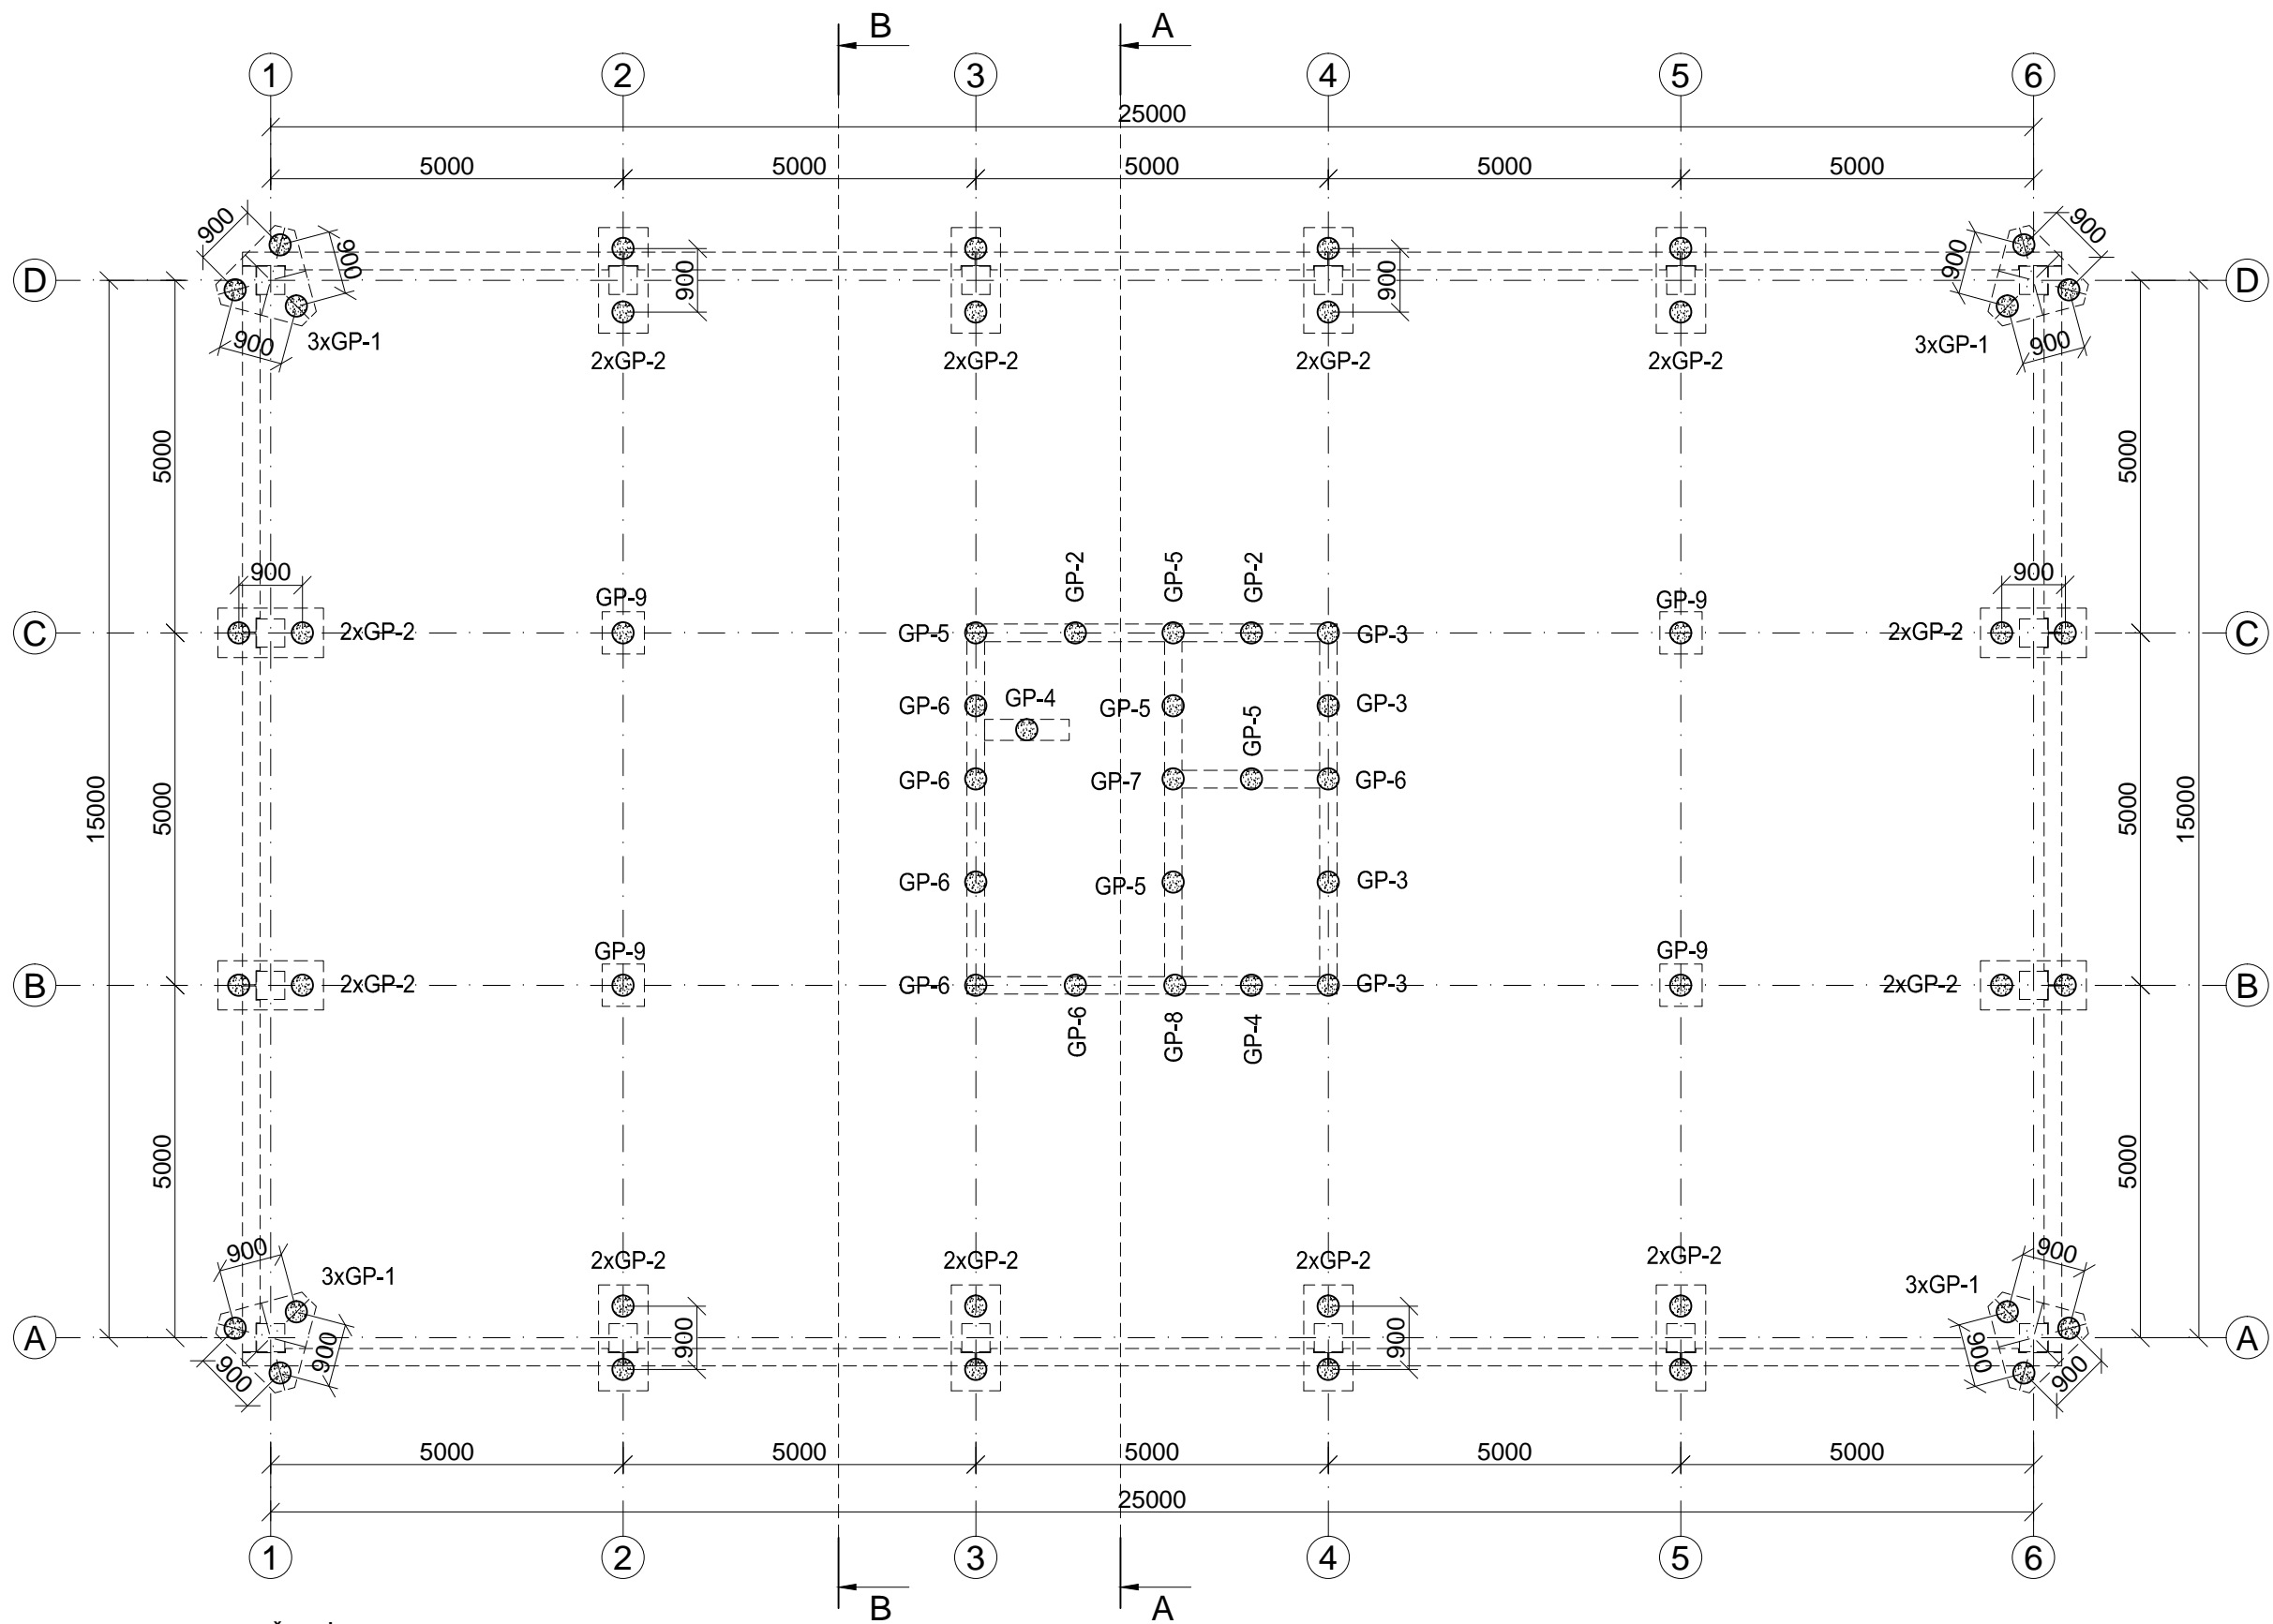

ŽYMĖJIMAS:  
GP-.... - Gręžtinis polis;

PASTABOS:

- Gręžtiniai poliniai pamatai suprojektuoti vidutinio stiprumo ir stipraus smėlingo, dulkingo moreninio molio pagrindui (qc=2.1-3.1 MPa, fs= 79-60 kPa).
- Gręžtiniai poliai - Ø300 mm skersmens ir 2,0 - 9,0 m ilgių.
- Pamatai gali būti įrengiami, tik vadovaujantis darbo projektu. Už pamatų įrengimo darbų kokybę atsako rangovas.
- Prieš rengiant darbo projektą būtina atlikti vietovės inžinerinius-geologinius tyrinėjimus ir patikslinti polių tipą ir įgilinimą.
- Pamatus gali įrengti tik kvalifikuotas rangovas.
- Gruntas po pamatais turi būti nejudintas, vientisos struktūros.
- Pamatai armuojami S500 stiprumo klasės armatūros strypynais, pagal LST EN ISO 15630-1:2010.
- Pamatams naudojamas C20/25 XC2 stiprumo klasės betonas, pagal LST EN 206-1:2002.

POLINIŲ PAMATŲ ŽINIARAŠTIS

| Žymėjimas | Diametras, mm | Ilgis, mm | Kiekis, vnt. |
|-----------|---------------|-----------|--------------|
| GP-1      | Ø300          | 2000      | 12           |
| GP-2      | Ø300          | 3000      | 26           |
| GP-3      | Ø300          | 3500      | 4            |
| GP-4      | Ø300          | 4000      | 2            |
| GP-5      | Ø300          | 4500      | 5            |
| GP-6      | Ø300          | 5000      | 6            |
| GP-7      | Ø300          | 6500      | 1            |
| GP-8      | Ø300          | 7500      | 1            |
| GP-9      | Ø300          | 9000      | 4            |

GRĘŽTINIŲ POLINIŲ PAMATŲ SĄNAUDŲ KIEKIŲ ŽINIARAŠTIS

| Eil. Nr. | Pozicija | Pavadinimas               | Žymuo | Mato vnt. | Kiekis | Sąnaudos Vien.      | Iš viso | Svoris vnt., t | Papildomi duomenys |
|----------|----------|---------------------------|-------|-----------|--------|---------------------|---------|----------------|--------------------|
| 1        | GP-1     | Polinis pamatas Ø300x2000 |       |           |        |                     |         |                |                    |
| 2        |          | Betonas C20/25 XC2        |       | m³        | 12     | 0.142               | 1.704   |                |                    |
| 3        |          | Armatūra S500             |       | kg        | 12     | 22.72               | 272.64  |                |                    |
| 4        | GP-2     | Polinis pamatas Ø300x3000 |       |           |        |                     |         |                |                    |
| 5        |          | Betonas C20/25 XC2        |       | m³        | 26     | 0.212               | 5.512   |                |                    |
| 6        |          | Armatūra S500             |       | kg        | 26     | 33.92               | 881.92  |                |                    |
| 7        | GP-3     | Polinis pamatas Ø300x3500 |       |           |        |                     |         |                |                    |
| 8        |          | Betonas C20/25 XC2        |       | m³        | 4      | 0.248               | 0.992   |                |                    |
| 9        |          | Armatūra S500             |       | kg        | 4      | 39.68               | 158.72  |                |                    |
| 10       | GP-4     | Polinis pamatas Ø300x4000 |       |           |        |                     |         |                |                    |
| 11       |          | Betonas C20/25 XC2        |       | m³        | 2      | 0.283               | 0.566   |                |                    |
| 12       |          | Armatūra S500             |       | kg        | 2      | 45.28               | 90.56   |                |                    |
| 13       | GP-5     | Polinis pamatas Ø300x4500 |       |           |        |                     |         |                |                    |
| 14       |          | Betonas C20/25 XC2        |       | m³        | 5      | 0.318               | 1.590   |                |                    |
| 15       |          | Armatūra S500             |       | kg        | 5      | 50.88               | 254.40  |                |                    |
| 16       | GP-6     | Polinis pamatas Ø300x5000 |       |           |        |                     |         |                |                    |
| 17       |          | Betonas C20/25 XC2        |       | m³        | 6      | 0.354               | 2.124   |                |                    |
| 18       |          | Armatūra S500             |       | kg        | 6      | 56.64               | 339.84  |                |                    |
| 19       | GP-7     | Polinis pamatas Ø300x6500 |       |           |        |                     |         |                |                    |
| 20       |          | Betonas C20/25 XC2        |       | m³        | 1      | 0.460               | 0.460   |                |                    |
| 21       |          | Armatūra S500             |       | kg        | 1      | 73.60               | 73.60   |                |                    |
| 22       | GP-8     | Polinis pamatas Ø300x7500 |       |           |        |                     |         |                |                    |
| 23       |          | Betonas C20/25 XC2        |       | m³        | 1      | 0.530               | 0.530   |                |                    |
| 24       |          | Armatūra S500             |       | kg        | 1      | 84.80               | 84.80   |                |                    |
| 25       | GP-9     | Polinis pamatas Ø300x9000 |       |           |        |                     |         |                |                    |
| 26       |          | Betonas C20/25 XC2        |       | m³        | 4      | 0.637               | 2.548   |                |                    |
| 27       |          | Armatūra S500             |       | kg        | 4      | 101.92              | 407.68  |                |                    |
|          |          |                           |       |           |        | Viso betono, m³:    | 16.026  |                |                    |
|          |          |                           |       |           |        | Viso armatūros, kg: | 2564.2  |                |                    |

|                            |                                                                                                                   |                                                                                                                                       |         |                                                                                     |         |                       |       |       |
|----------------------------|-------------------------------------------------------------------------------------------------------------------|---------------------------------------------------------------------------------------------------------------------------------------|---------|-------------------------------------------------------------------------------------|---------|-----------------------|-------|-------|
| KVAL.<br>PATV.<br>DOK. NR. |                                                                                                                   | UAB "Konstrukcijų pasaulis"                                                                                                           |         | STATINIO PROJEKTO PAVADINIMAS                                                       |         |                       |       |       |
|                            |                                                                                                                   | Jonavos g. 260, Kaunas<br>Įm. k.: 304690224<br>Tel. +370 (613) 98089<br>El.p.: k.pazereckas@gmail.com<br>www.konstrukciju-pasaulis.lt |         | Negyvenamasis 2 aukštų klijotosios medienos konstrukcijų mokslo paskirties pastatas |         |                       |       |       |
|                            |                                                                                                                   | 37603                                                                                                                                 | PDV     | Kęstutis Pažereckas                                                                 | 2018 08 | DOKUMENTO PAVADINIMAS |       | LAIDA |
|                            |                                                                                                                   | 37603                                                                                                                                 | Konstr. | Kęstutis Pažereckas                                                                 | 2018 08 | Polių pamatų planas   |       | O     |
| LT                         | UŽSAKOVAS                                                                                                         |                                                                                                                                       |         | BRĖŽINIO ŽYMUO                                                                      |         |                       | LAPAS | LAPŲ  |
|                            | Miškų institutas, Lietuvos agrarinių ir miškų mokslų centro filialas, Liepų g. 1, Girionių k., LT-53101, Kauno r. |                                                                                                                                       |         | KPRS18/02-TP-SK-2.3                                                                 |         |                       | 1     | 1     |
|                            |                                                                                                                   |                                                                                                                                       |         |                                                                                     |         |                       |       |       |
|                            |                                                                                                                   |                                                                                                                                       |         |                                                                                     |         |                       |       |       |



POLIŲ GALVENŲ IR ROSTVERKŲ PLANAS MASTELIS 1:100

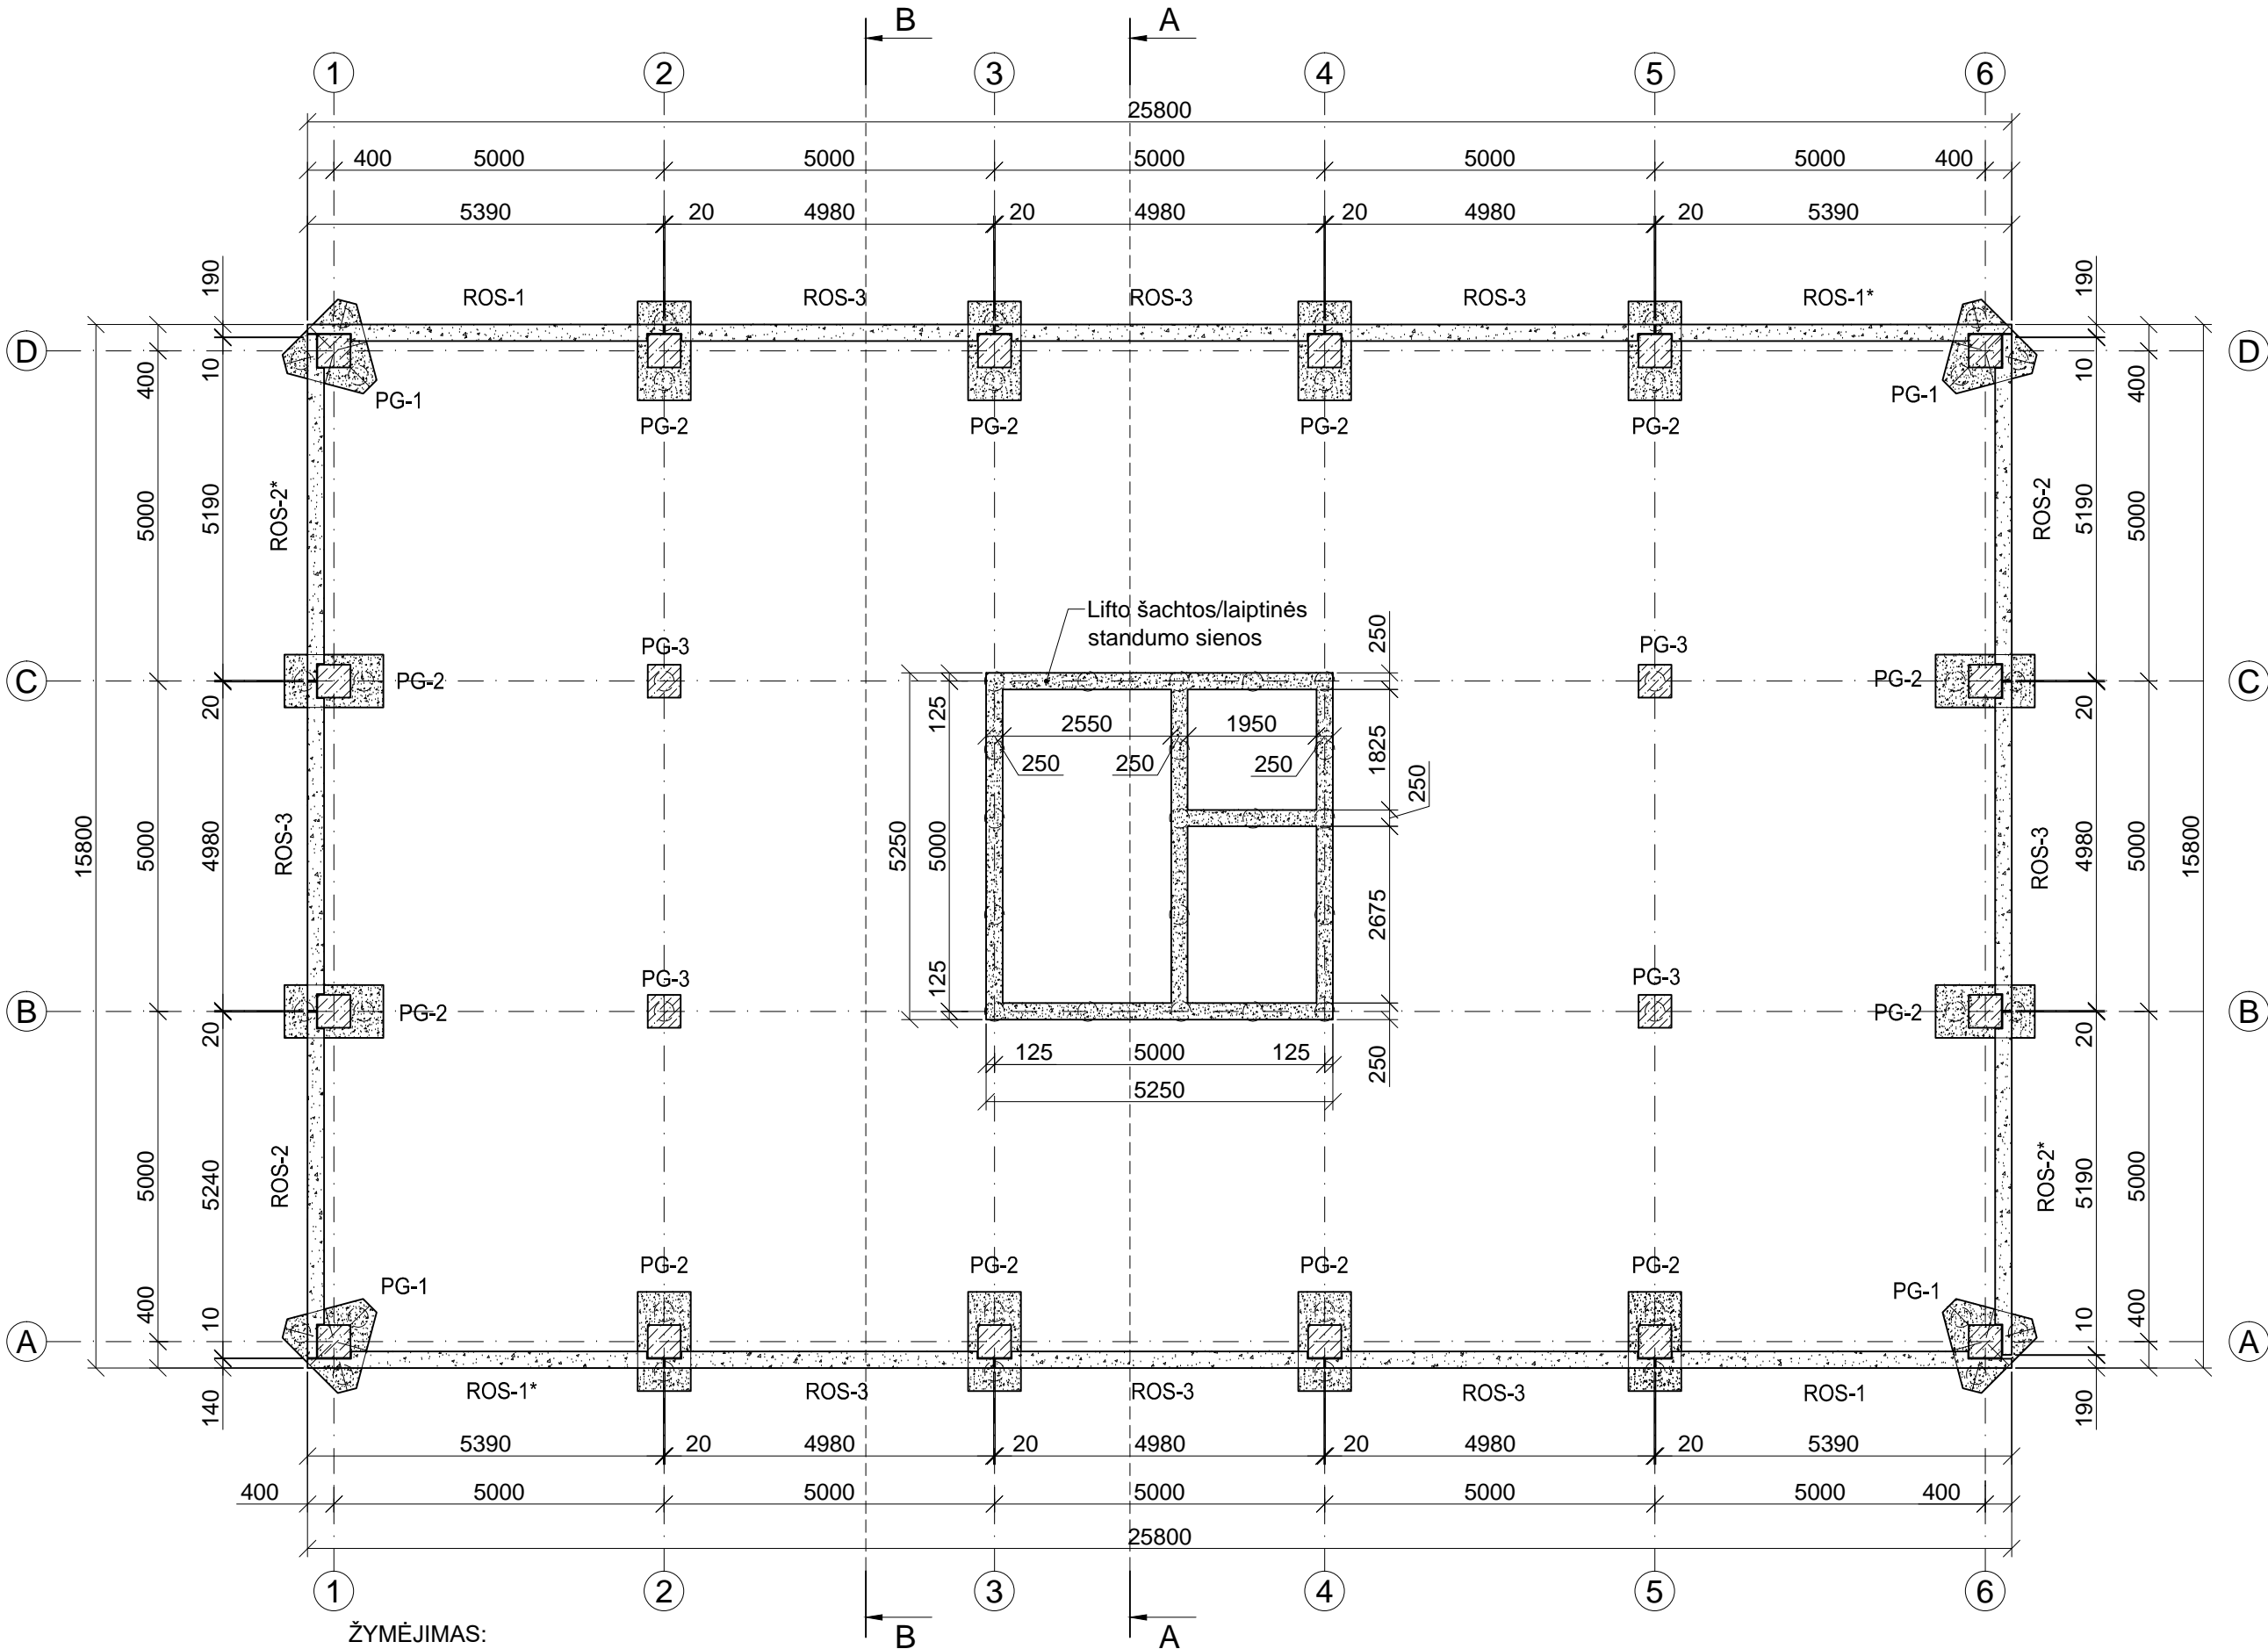

ŽYMĖJIMAS:  
PG-... - Polių galvena;  
ROS-x - Rostverkas;  
ROS-x\* - Veidrodiškas rostverkas;

ROSTVERKŲ TVIRTINIMO PRIE POLIŲ GALVENOS MAZGAS MASTELIS 1:10

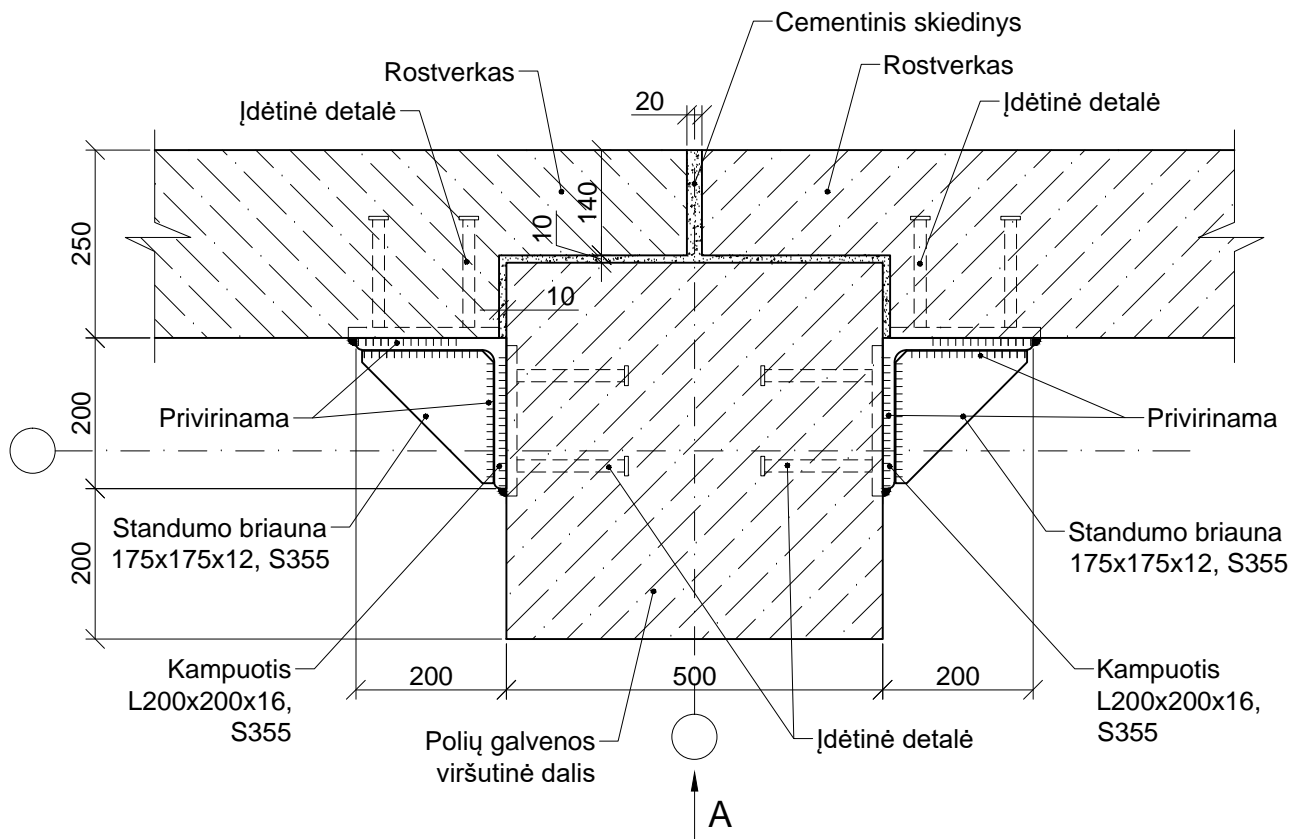

VAIZDAS A MASTELIS 1:10

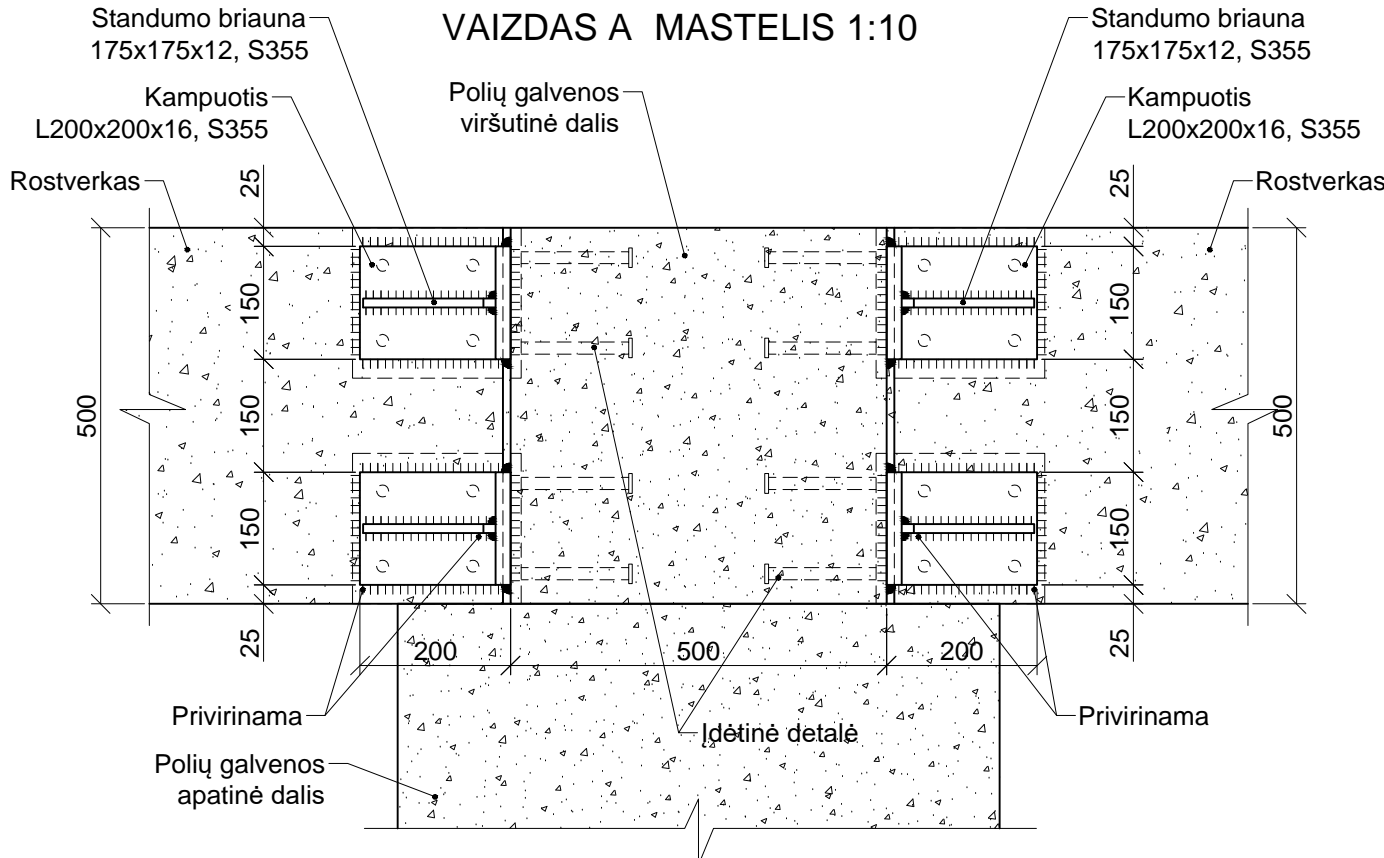

GALVENŲ PARUOŠIAMŲJŲ SLUOKSNIŲ SĄNAUDŲ KIEKIŲ ŽINIARAŠTIS

| Eil. Nr.         | Posicija | Pavadinimas                           | Žymuo | Mato vnt. | Kiekis | Sąnaudos Vien. | Iš viso | Svoris vnt., t | Papildomi duomenys |
|------------------|----------|---------------------------------------|-------|-----------|--------|----------------|---------|----------------|--------------------|
| 1                | PG-1     | Paruošiamasis sluoksnis 1700x1500x100 |       |           |        |                |         |                |                    |
| 2                |          | Betonas C8/10                         |       | m³        | 4      | 0.255          | 1.020   |                |                    |
| 3                | PG-2     | Paruošiamasis sluoksnis 1700x1000x100 |       |           |        |                |         |                |                    |
| 4                |          | Betonas C8/10                         |       | m³        | 12     | 0.170          | 2.040   |                |                    |
| 5                | PG-3     | Paruošiamasis sluoksnis 700x700x100   |       |           |        |                |         |                |                    |
| 6                |          | Betonas C8/10                         |       | m³        | 4      | 0.049          | 0.196   |                |                    |
| Viso betono, m³: |          |                                       |       |           |        |                | 3.256   |                |                    |

MONOLITINIŲ POLIŲ GALVENŲ SĄNAUDŲ KIEKIŲ ŽINIARAŠTIS

| Eil. Nr.                          | Posicija | Pavadinimas                   | Žymuo | Mato vnt. | Kiekis | Sąnaudos Vien. | Iš viso | Svoris vnt., t | Papildomi duomenys |
|-----------------------------------|----------|-------------------------------|-------|-----------|--------|----------------|---------|----------------|--------------------|
| 1                                 | PG-1     | Poliaus galvena 1477x1275x600 |       |           |        |                |         |                |                    |
| 2                                 |          | Betonas C25/30 XC2            |       | m³        | 4      | 0.746          | 2.984   |                |                    |
| 3                                 |          | Armatura S500                 |       | kg        | 4      | 74.60          | 298.40  |                |                    |
| 4                                 |          | Idėtinių detalių plienas S355 |       | kg        | 4      | 15.00          | 60.00   |                |                    |
| 5                                 | PG-2     | Poliaus galvena 1500x800x600  |       |           |        |                |         |                |                    |
| 6                                 |          | Betonas C25/30 XC2            |       | m³        | 12     | 0.720          | 8.640   |                |                    |
| 7                                 |          | Armatura S500                 |       | kg        | 12     | 72.00          | 864.00  |                |                    |
| 8                                 |          | Idėtinių detalių plienas S355 |       | kg        | 12     | 15.00          | 180.00  |                |                    |
| 9                                 | PG-3     | Poliaus galvena 500x500x600   |       |           |        |                |         |                |                    |
| 10                                |          | Betonas C25/30 XC2            |       | m³        | 4      | 0.150          | 0.600   |                |                    |
| 11                                |          | Armatura S500                 |       | kg        | 4      | 15.00          | 60.00   |                |                    |
| 12                                |          | Idėtinių detalių plienas S355 |       | kg        | 4      | 15.00          | 60.00   |                |                    |
| Viso betono, m³:                  |          |                               |       |           |        |                | 12.224  |                |                    |
| Viso armatūros, kg:               |          |                               |       |           |        |                | 1222.4  |                |                    |
| Viso idėtinių detalių plieno, kg: |          |                               |       |           |        |                | 300.00  |                |                    |

GELŽBETONINIŲ ROSTVERKŲ SĄNAUDŲ KIEKIŲ ŽINIARAŠTIS

| Eil. Nr.            | Posicija | Pavadinimas             | Žymuo | Mato vnt. | Kiekis | Sąnaudos Vien. | Iš viso | Svoris vnt., t | Papildomi duomenys |
|---------------------|----------|-------------------------|-------|-----------|--------|----------------|---------|----------------|--------------------|
| 1                   | ROS-1    | Rostverkas 5390x500x250 |       |           |        |                |         |                |                    |
| 2                   |          | Betonas C25/30 XC2      |       | m³        | 2      | 0.624          | 1.248   |                |                    |
| 3                   |          | Armatura S500           |       | kg        | 2      | 74.88          | 149.76  |                |                    |
| 4                   | ROS-1*   | Rostverkas 5390x500x250 |       |           |        |                |         |                |                    |
| 5                   |          | Betonas C25/30 XC2      |       | m³        | 2      | 0.624          | 1.248   |                |                    |
| 6                   |          | Armatura S500           |       | kg        | 2      | 74.88          | 149.76  |                |                    |
| 7                   | ROS-2    | Rostverkas 4980x500x250 |       |           |        |                |         |                |                    |
| 8                   |          | Betonas C25/30 XC2      |       | m³        | 2      | 0.613          | 1.226   |                |                    |
| 9                   |          | Armatura S500           |       | kg        | 2      | 73.56          | 147.12  |                |                    |
| 10                  | ROS-2*   | Rostverkas 4980x500x250 |       |           |        |                |         |                |                    |
| 11                  |          | Betonas C25/30 XC2      |       | m³        | 2      | 0.613          | 1.226   |                |                    |
| 12                  |          | Armatura S500           |       | kg        | 2      | 73.56          | 147.12  |                |                    |
| 13                  | ROS-3    | Rostverkas 4980x500x250 |       |           |        |                |         |                |                    |
| 14                  |          | Betonas C25/30 XC2      |       | m³        | 8      | 0.595          | 4.760   |                |                    |
| 15                  |          | Armatura S500           |       | kg        | 8      | 71.40          | 571.20  |                |                    |
| Viso betono, m³:    |          |                         |       |           |        |                | 9.708   |                |                    |
| Viso armatūros, kg: |          |                         |       |           |        |                | 1165.0  |                |                    |

GELŽBETONINIŲ ROSTVERKŲ TVIRTINIMO SĄNAUDŲ KIEKIŲ ŽINIARAŠTIS

| Eil. Nr.         | Posicija      | Pavadinimas                  | Žymuo | Mato vnt. | Kiekis | Sąnaudos Vien. | Iš viso | Svoris vnt., t | Papildomi duomenys |
|------------------|---------------|------------------------------|-------|-----------|--------|----------------|---------|----------------|--------------------|
| 1                | ROS-1/ ROS-1* | Rostverkas 5390x500x250      |       |           |        |                |         |                |                    |
| 2                |               | Idėtinės plieno detalės S355 |       | kg        | 4      | 20             | 80.0    |                |                    |
| 3                |               | Jungimo plienas S355         |       | kg        | 4      | 40             | 160.0   |                |                    |
| 4                | ROS-2/ ROS-2* | Rostverkas 5390x500x250      |       |           |        |                |         |                |                    |
| 5                |               | Idėtinės plieno detalės S355 |       | kg        | 4      | 20             | 80.0    |                |                    |
| 6                |               | Jungimo plienas S355         |       | kg        | 4      | 40             | 160.0   |                |                    |
| 7                | ROS-3         | Rostverkas 4980x500x250      |       |           |        |                |         |                |                    |
| 8                |               | Idėtinės plieno detalės S355 |       | kg        | 8      | 20             | 160.0   |                |                    |
| 9                |               | Jungimo plienas S355         |       | kg        | 8      | 40             | 320.0   |                |                    |
| Viso plieno, kg: |               |                              |       |           |        |                | 960.0   |                |                    |

PASTABOS:

- Pamatus gali įrengti tik kvalifikuotas rangovas.
- Pamatai gali būti įrengiami, tik vadovaujantis darbo projektu. Už pamatų įrengimo darbų kokybę atsako rangovas.
- Gruntas po pamatais turi būti nejudintas, vientisos struktūros.
- Pamatų galvenos įrengiamos ant C8/10 paruošiamojo betono sluoksnio, prieš tai sutankinus esamą žvyringą smėlį, k=0.96.
- Pamatų galvenos užpilamos žvyro/smėlio mišiniu, pastarąjį sutankinant, k=0.96.
- Ant galvenos viršaus tepama hidroiziacija, jei ant jos įrengiama medinė konstrukcija plienine baze.
- Monolitinės galvenos ir rostverkai armuojami S500 stiprumo klasės armatūros tinklais ir strypynais, pagal LST EN ISO 15630-1:2010.
- Monolitinės galvenoms ir rostverkams naudojamas C25/30, XC2, stiprumo klasės betonas, pagal LST EN 206-1:2002.

|                      |         |                                                                                                                                                                      |         |                                                                                                                       |  |            |
|----------------------|---------|----------------------------------------------------------------------------------------------------------------------------------------------------------------------|---------|-----------------------------------------------------------------------------------------------------------------------|--|------------|
| KVAL. PATV. DOK. NR. |         | UAB "Konstrukcijų pasaulis"<br>Jonavos g. 260, Kaunas<br>Įm. k.: 304690224<br>Tel. +370 (613) 98089<br>El.p.: k.pazereckas@gmail.com<br>www.konstrukciju-pasaulis.lt |         | STATINIO PROJEKTO PAVADINIMAS<br>Negyvenamasis 2 aukštų klijuotosios medienos konstrukcijų mokslo paskirties pastatas |  |            |
| 37603                | PDV     | Kęstutis Pažereckas                                                                                                                                                  | 2018 08 | DOKUMENTO PAVADINIMAS<br>Polių galvenų ir rostverkų planas                                                            |  | LAIDA      |
| 37603                | Konstr. | Kęstutis Pažereckas                                                                                                                                                  | 2018 08 |                                                                                                                       |  | O          |
| LT                   |         | UŽSAKOVAS<br>Miškų institutas, Lietuvos agrarinių ir miškų mokslų centro filialas, Liepų g. 1, Girionių k., LT-53101, Kauno r.                                       |         | BRĖŽINIO ŽYMUO<br>KPRS18/02-TP-SK-2.4                                                                                 |  | LAPAS LAPŲ |
|                      |         |                                                                                                                                                                      |         |                                                                                                                       |  | 1 1        |

POLIAUS GALVENA PG-1 MASTELIS 1:25

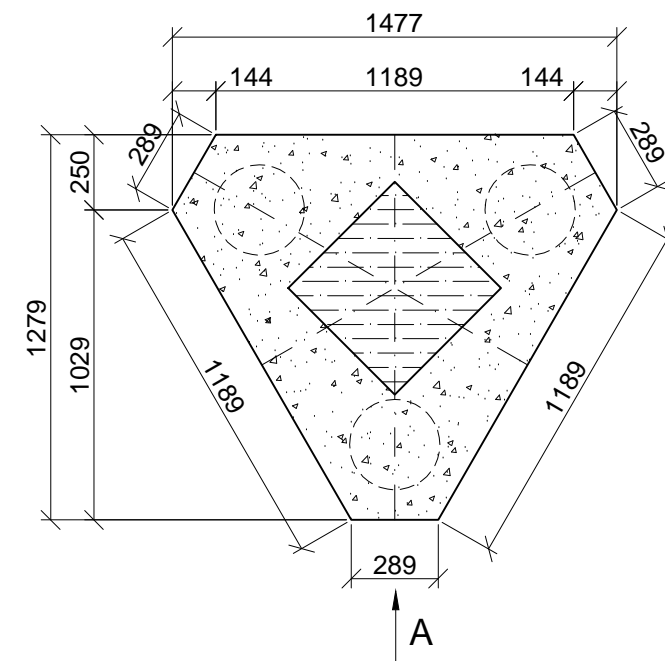

VAIZDAS A MASTELIS 1:25

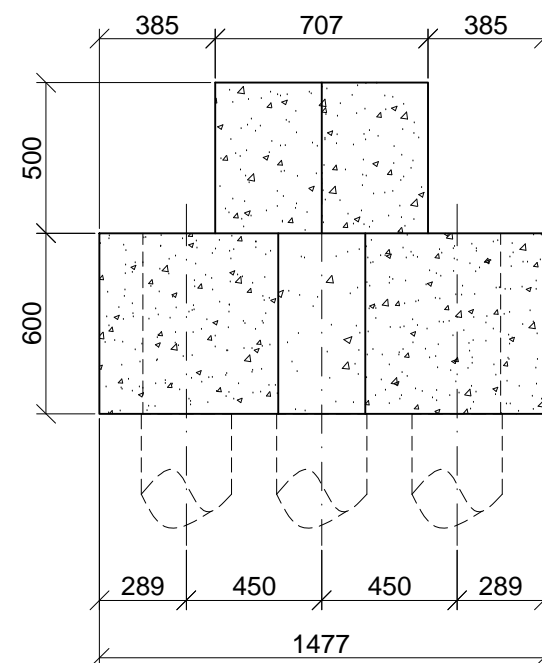

POLIAUS GALVENA PG-2 MASTELIS 1:25

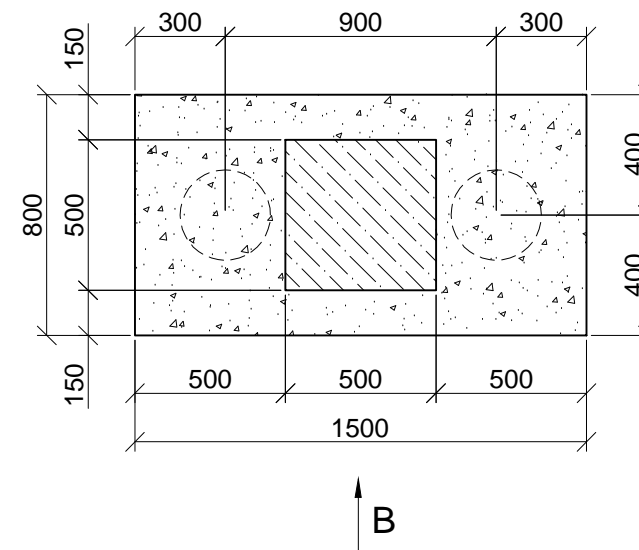

VAIZDAS B MASTELIS 1:25

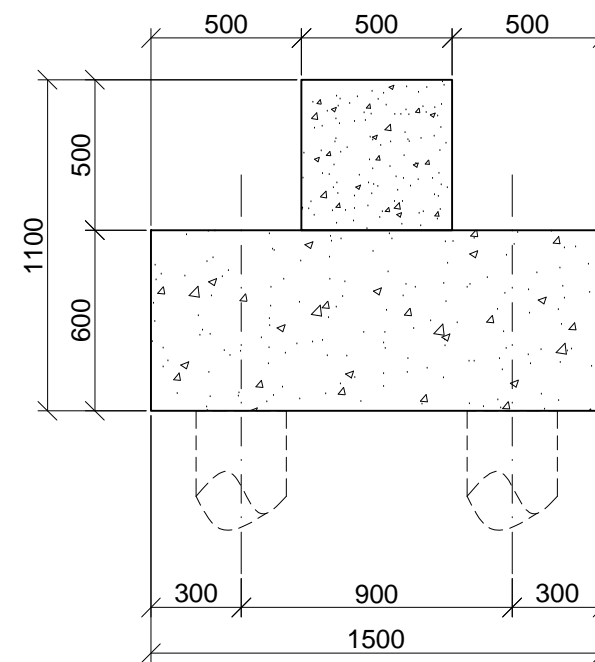

POLIAUS GALVENA PG-3 MASTELIS 1:25

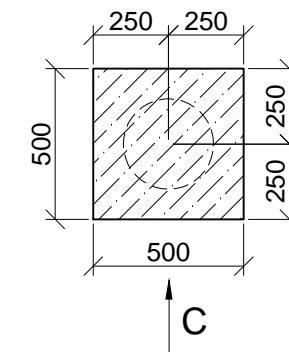

VAIZDAS C MASTELIS 1:25

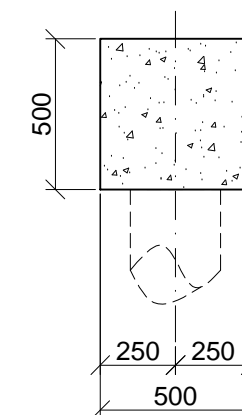

|                            |                                                                                                                                |                                                                                                                                                                             |         |                                                                                                                       |  |       |
|----------------------------|--------------------------------------------------------------------------------------------------------------------------------|-----------------------------------------------------------------------------------------------------------------------------------------------------------------------------|---------|-----------------------------------------------------------------------------------------------------------------------|--|-------|
| KVAL.<br>PATV.<br>DOK. NR. |                                                                                                                                | <b>UAB "Konstrukcijų pasaulis"</b><br>Jonavos g. 260, Kaunas<br>Įm. k.: 304690224<br>Tel. +370 (613) 98089<br>El.p.: k.pazereckas@gmail.com<br>www.konstrukciju-pasaulis.lt |         | STATINIO PROJEKTO PAVADINIMAS<br>Negyvenamasis 2 aukštų klijuotosios medienos konstrukcijų mokslo paskirties pastatas |  |       |
| 37603                      | PDV                                                                                                                            | Kęstutis Pažereckas                                                                                                                                                         | 2018 08 | DOKUMENTO PAVADINIMAS<br>Polių galvenos                                                                               |  | LAIDA |
| 37603                      | Konstr.                                                                                                                        | Kęstutis Pažereckas                                                                                                                                                         | 2018 08 |                                                                                                                       |  | O     |
| LT                         | UŽSAKOVAS<br>Miškų institutas, Lietuvos agrarinių ir miškų mokslų centro filialas, Liepų g. 1, Girionių k., LT-53101, Kauno r. |                                                                                                                                                                             |         | BRĖŽINIO ŽYMUO<br>KPRS18/02-TP-SK-2.5                                                                                 |  | LAPAS |
|                            |                                                                                                                                |                                                                                                                                                                             |         |                                                                                                                       |  | LAPŲ  |
|                            |                                                                                                                                |                                                                                                                                                                             |         |                                                                                                                       |  | 1     |
|                            |                                                                                                                                |                                                                                                                                                                             |         |                                                                                                                       |  | 1     |

ROSTVERKAS ROS-1 MASTELIS 1:50

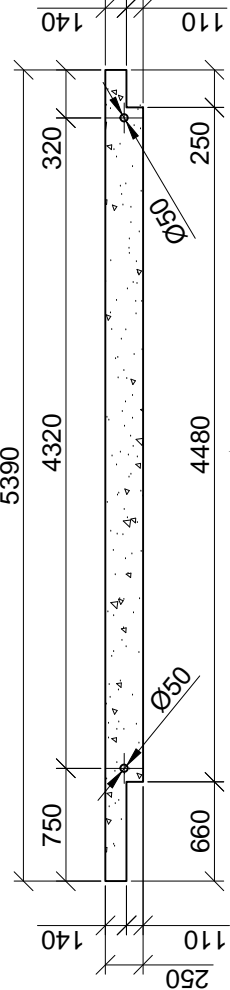

VAIZDAS A MASTELIS 1:50

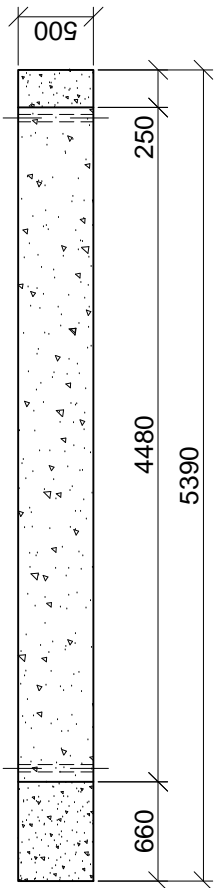

ROSTVERKAS ROS-1\* MASTELIS 1:50

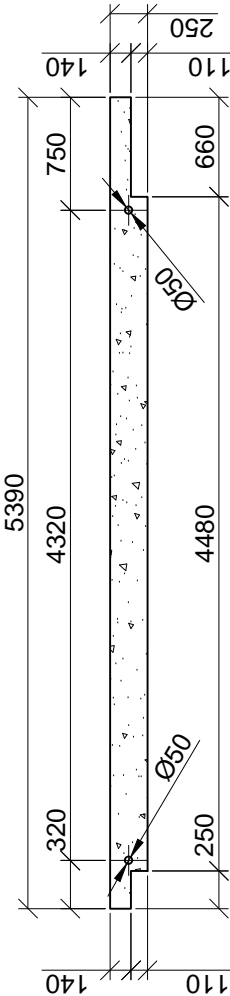

VAIZDAS B MASTELIS 1:50

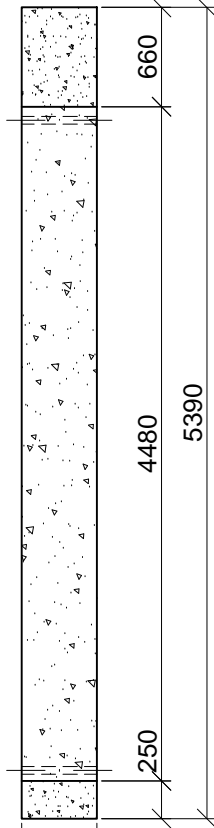

ROSTVERKAS ROS-2 MASTELIS 1:50

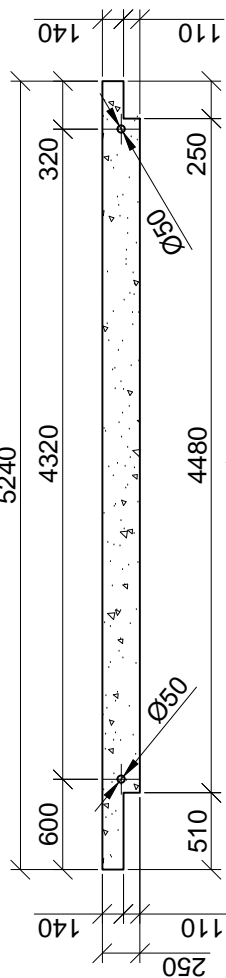

VAIZDAS C MASTELIS 1:50

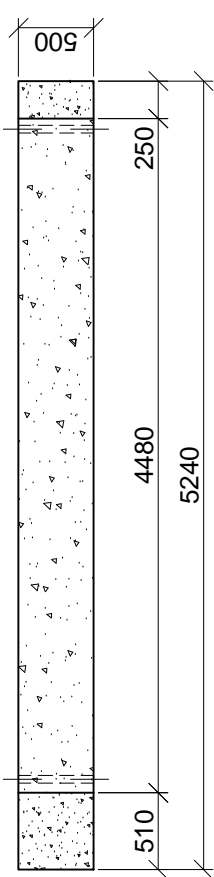

ROSTVERKAS ROS-2\* MASTELIS 1:50

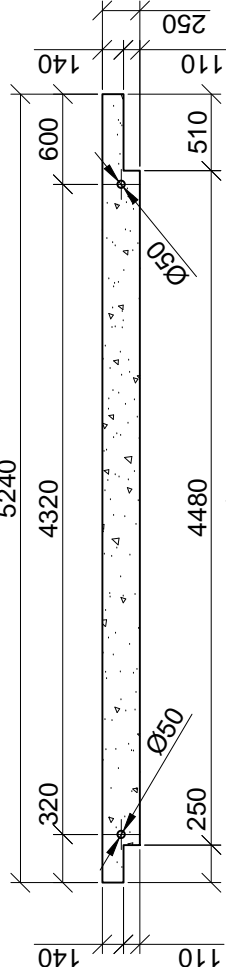

VAIZDAS D MASTELIS 1:50

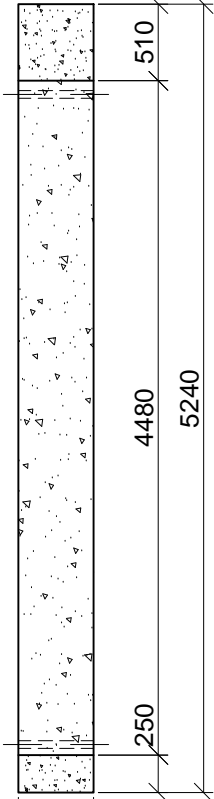

ROSTVERKAS ROS-3 MASTELIS 1:50

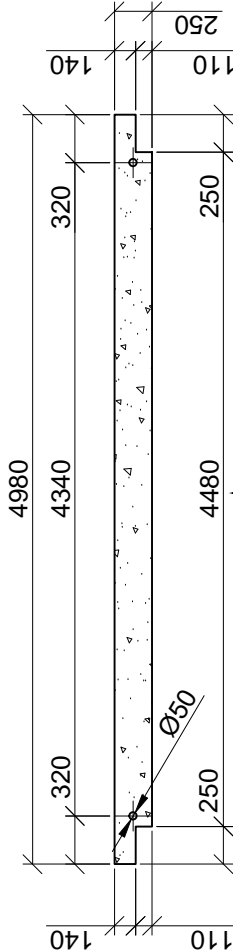

VAIZDAS E MASTELIS 1:50

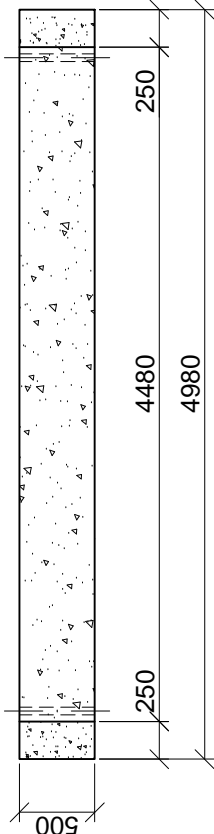

|                            |                                                                                                                      |                               |         |                                                                  |  |  |       |      |
|----------------------------|----------------------------------------------------------------------------------------------------------------------|-------------------------------|---------|------------------------------------------------------------------|--|--|-------|------|
| KVAL.<br>PATV.<br>DOK. NR. |                                 | UAB "Konstrukcijų pasaulis"   |         | STATINIO PROJEKTO PAVADINIMAS                                    |  |  |       |      |
|                            |                                                                                                                      | Jonavos g. 260, Kaunas        |         | Negyvenamasis 2 aukštų klijuotosios medienos konstrukcijų mokslo |  |  |       |      |
|                            |                                                                                                                      | Im. k.: 304690224             |         | paskirties pastatas                                              |  |  |       |      |
|                            |                                                                                                                      | Tel. +370 (613) 98089         |         |                                                                  |  |  |       |      |
|                            |                                                                                                                      | El.p.: k.pazereckas@gmail.com |         |                                                                  |  |  |       |      |
|                            |                                                                                                                      | www.konstrukciju-pasaulis.lt  |         |                                                                  |  |  |       |      |
| 37603                      | PDV                                                                                                                  | Kęstutis Pažereckas           | 2018 08 | DOKUMENTO PAVADINIMAS<br>Rostverkai                              |  |  | LAIDA |      |
| 37603                      | Konstr.                                                                                                              | Kęstutis Pažereckas           | 2018 08 |                                                                  |  |  | O     |      |
|                            |                                                                                                                      |                               |         |                                                                  |  |  |       |      |
| LT                         | UŽSAKOVAS                                                                                                            |                               |         | BRĖŽINIO ŽYMUO<br><br>KPRS18/02-TP-SK-2.6                        |  |  | LAPAS | LAPŲ |
|                            | Miškų institutas, Lietuvos agrarinių ir miškų mokslų<br>centro filialas, Liepų g. 1, Girionių k., LT-53101, Kauno r. |                               |         |                                                                  |  |  | 1     | 1    |



PIRMO AUKŠTO PLANAS MASTELIS 1:100

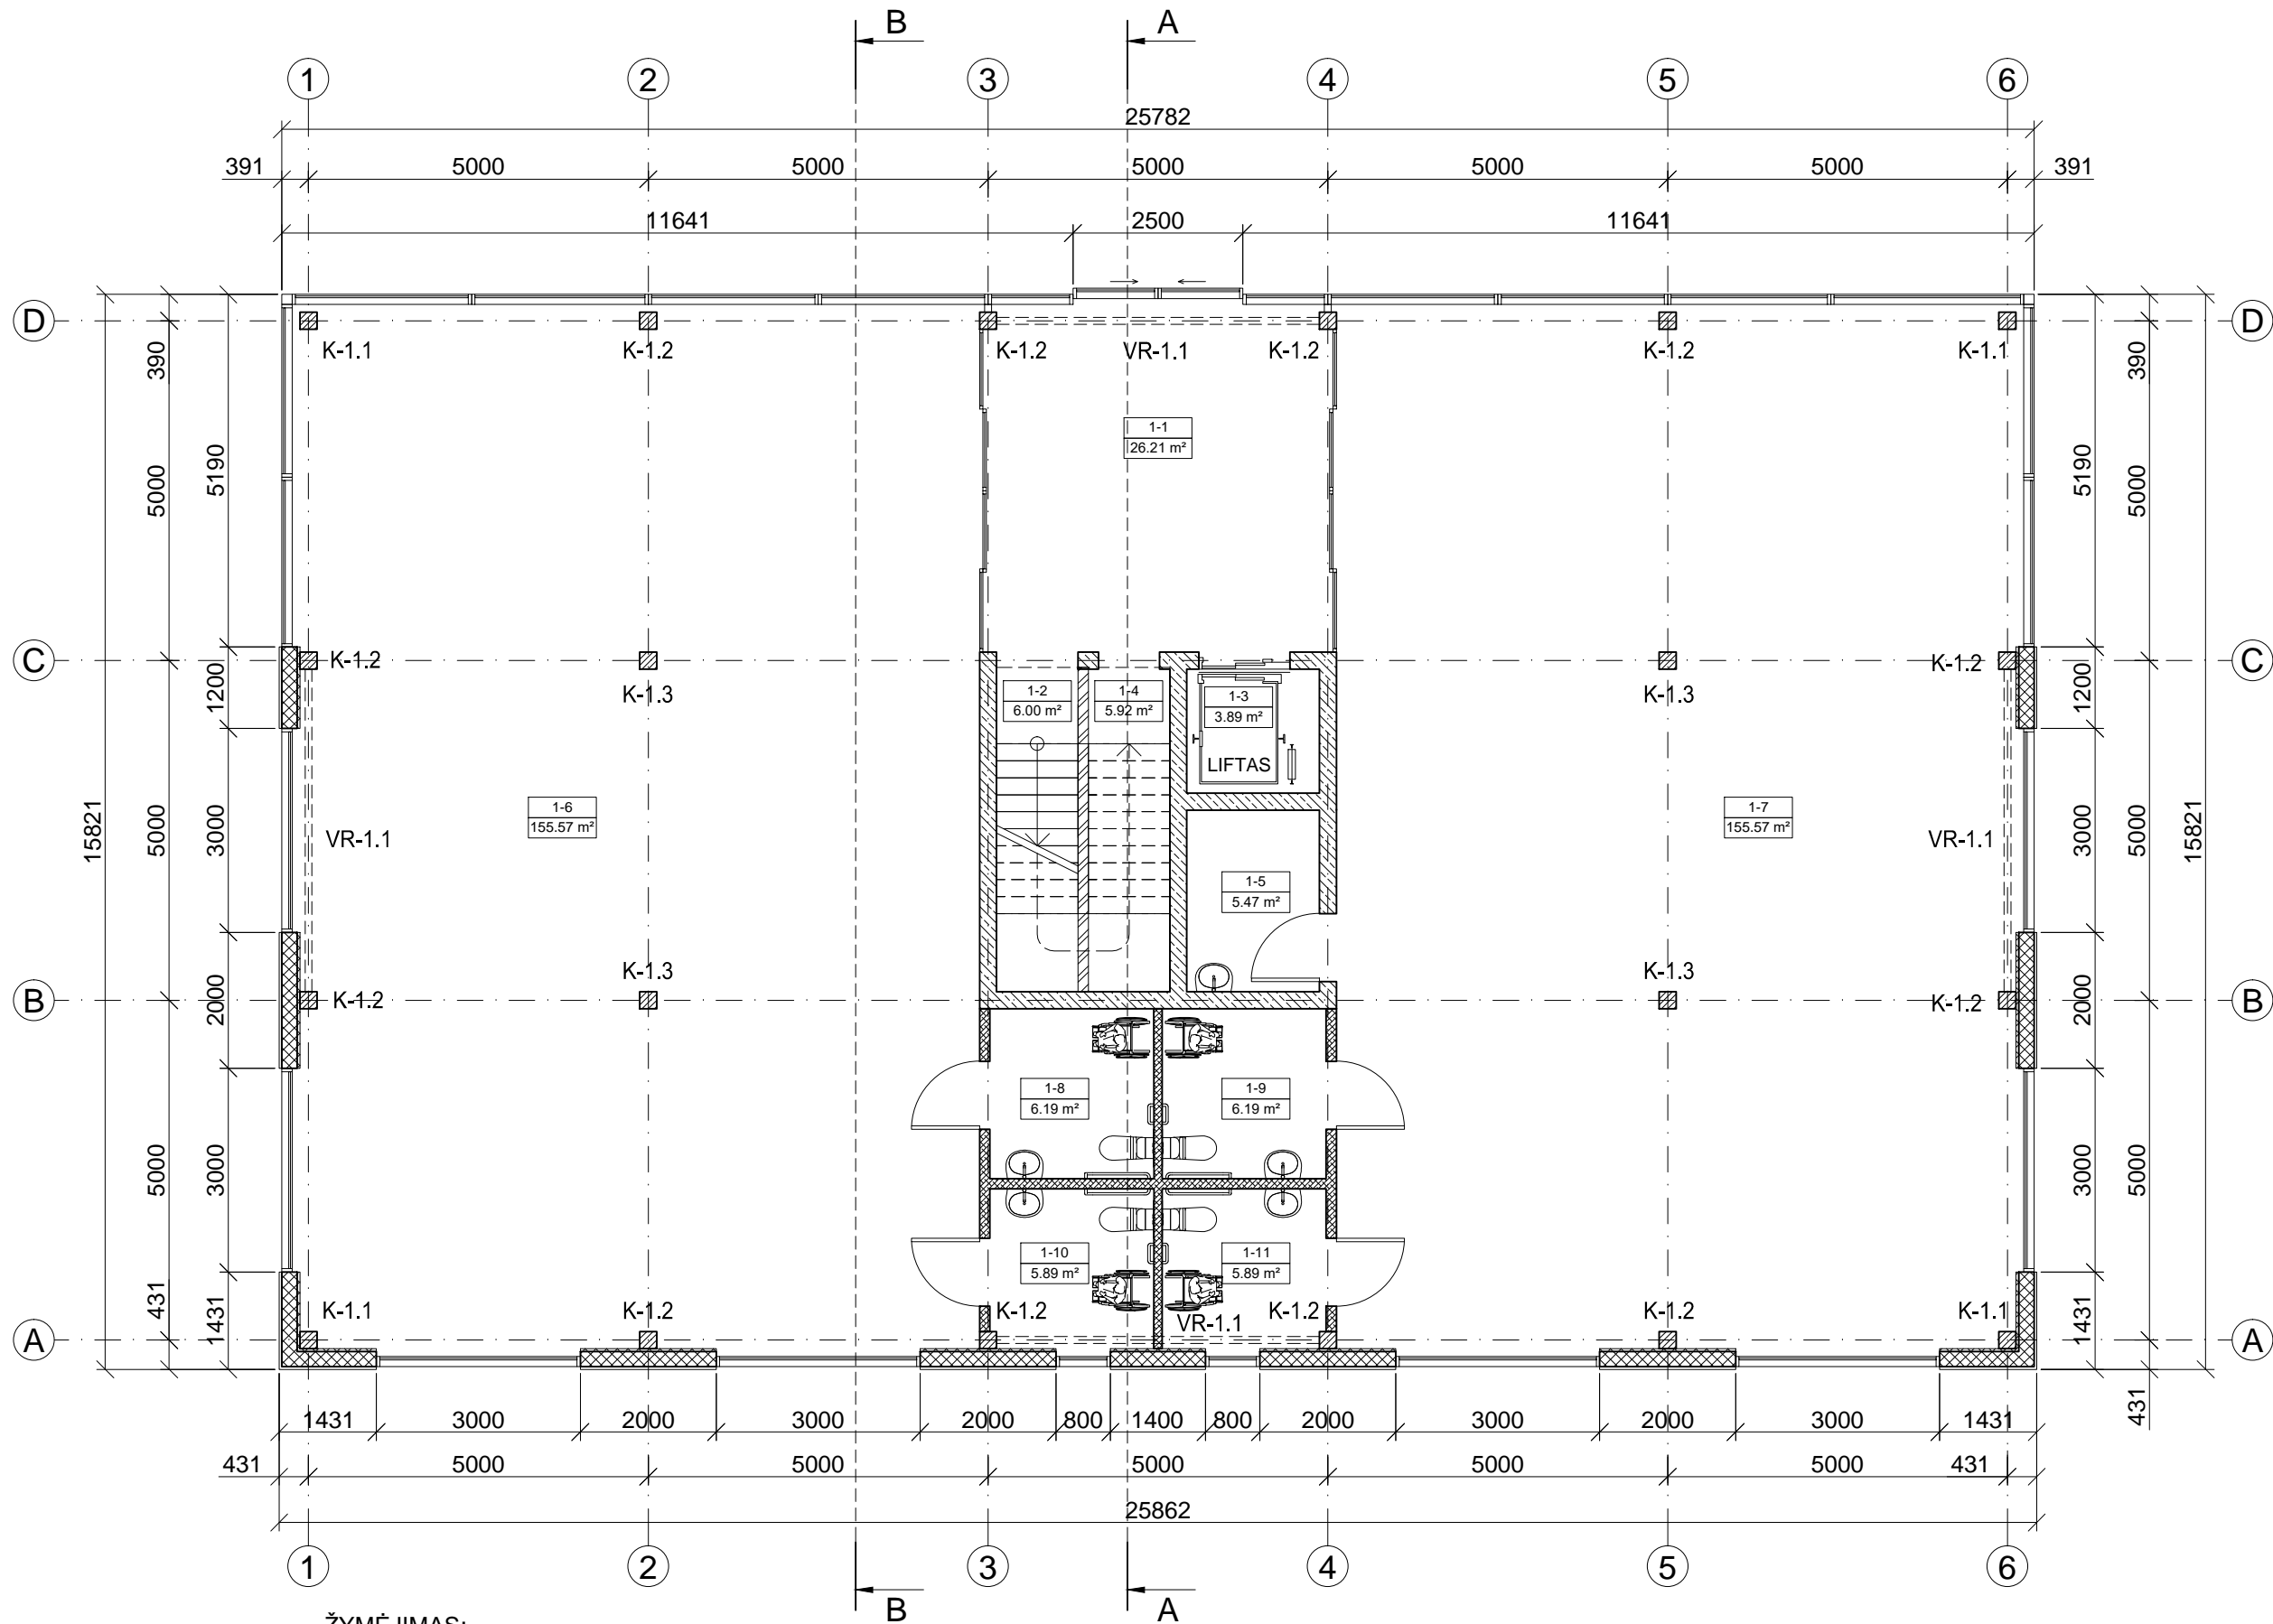

ŽYMĖJIMAS:  
K-... - Medinė kolona;  
VR-... - Plieniniai vertikalieji ryšiai;

PASTABOS:

- Medinių kolonų montavimui ant pamato bei tarpusavio sujungimams naudojamos įdėtinės plieninės kolonų detalės ir inkariniai varžtai.
- Medinių kolonų įdėtinės detalės projektuojamos darbo projekto stadijoje.
- Kolonoms naudojama GL28h stiprumo klasės klijuotoji sluoksninė mediena.
- Medinių kolonų atsparumas ugniai R60 min užtikrinamas skaičiavimais, papildomu apsauginiu medienos sluoksniu.
- Monolitinėms laiptinių ir lifto šachtų standumo sienoms naudojamas C30/37 X0 klasės betonas, pagal LST EN 206-1:2002.
- Monolitiniai elementai armuojami S500 stiprumo klasės armatūros tinklais ir/ar strypynais, pagal LST EN ISO 15630-1:2010.
- Metalinėms konstrukcijoms ir elementams naudojamas S355 stiprumo klasės plienas.
- Suvirinimo jungčių briaunų paruošimas turi būti atliekamas pagal EN ISO 9692-1.
- Metaliniai elementai tarpusavyje suvirinami, siūlės aukštis 1,2-1,4 - plonesniojo iš jungiamųjų elementų storis (jei nenurodyta kitaip), pagal LST EN ISO 9692-1:2004.
- Konstrukcijų suvirinimui naudojamos suvirinimo medžiagos užtikrinančios suvirinimo siūlės skaičiuojamuosius stiprius ne mažesnius nei suvirinamo metalo.
- Metaliniai paviršiai gruntuojami ir dažomi, pagal LST EN ISO 12944-2:2000.
- Skylės varžtams daromos 2 mm didesnės nei varžto diametras (jei brėžinyje nenurodyta kitaip).
- Darbai vykdomi pagal darbo projektą.

| Patalpų eksplikacija |                  |           |
|----------------------|------------------|-----------|
| Numeris              | Patalpa          | Plotas    |
| 1-1                  | Fojė             | 26.21 m²  |
| 1-2                  | Laiptinė         | 6.00 m²   |
| 1-3                  | Lifto šachta     | 3.89 m²   |
| 1-4                  | Tech. patalpa    | 5.92 m²   |
| 1-5                  | Tech. patalpa    | 5.47 m²   |
| 1-6                  | Istaigų patalpos | 155.57 m² |
| 1-7                  | Istaigų patalpos | 155.57 m² |
| 1-8                  | San. mazgas      | 6.19 m²   |
| 1-9                  | San. mazgas      | 6.19 m²   |
| 1-10                 | San. mazgas      | 5.89 m²   |
| 1-11                 | San. mazgas      | 5.89 m²   |
| Viso aukšte:         |                  | 382.79 m² |
| Viso pastate:        |                  | 764.84 m² |

MEDINIŲ PIRMO AUKŠTO KOLONŲ SĄNAUDŲ KIEKIŲ ŽINIARAŠTIS

| Eil. Nr.                         | Pozicija | Pavadinimas                  | Žymuo | Mato vnt. | Kiekis | Sąnaudos |         | Svoris vnt., t | Papildomi duomenys |
|----------------------------------|----------|------------------------------|-------|-----------|--------|----------|---------|----------------|--------------------|
|                                  |          |                              |       |           |        | Vien.    | Iš viso |                |                    |
| 1                                | K-1.1    | Kolona 250x250x3600          |       |           |        |          |         |                |                    |
| 2                                |          | Klijuota mediena GL28h       |       | m³        | 4      | 0,216    | 0,864   |                |                    |
| 3                                |          | Jungimo detalių plienas S355 |       | kg        | 4      | 85,00    | 340,00  |                |                    |
| 4                                | K-1.2    | Kolona 250x250x3600          |       |           |        |          |         |                |                    |
| 5                                |          | Klijuota mediena GL28h       |       | m³        | 12     | 0,216    | 2,592   |                |                    |
| 6                                |          | Jungimo detalių plienas S355 |       | kg        | 12     | 95,00    | 1140,0  |                |                    |
| 7                                | K-1.3    | Kolona 250x250x3600          |       |           |        |          |         |                |                    |
| 8                                |          | Klijuota mediena GL28h       |       | m³        | 4      | 0,216    | 0,864   |                |                    |
| 9                                |          | Jungimo detalių plienas S355 |       | kg        | 4      | 100,00   | 400,00  |                |                    |
| Viso klijuotos medienos, m³:     |          |                              |       |           |        |          | 4,320   |                |                    |
| Viso jungimo detalių plieno, kg: |          |                              |       |           |        |          | 1880,0  |                |                    |

PIRMO AUKŠTO PLIENINIŲ RYŠIŲ SĄNAUDŲ KIEKIŲ ŽINIARAŠTIS

| Eil. Nr.         | Pozicija | Pavadinimas                  | Žymuo | Mato vnt. | Kiekis | Sąnaudos |         | Svoris vnt., t | Papildomi duomenys |
|------------------|----------|------------------------------|-------|-----------|--------|----------|---------|----------------|--------------------|
|                  |          |                              |       |           |        | Vien.    | Iš viso |                |                    |
| 1                | VR-1.1   | Plieniniai vertikalūs ryšiai |       | vnt.      | 4      | 196,90   | 787,60  |                |                    |
| 2                |          | Ø101 6x6, S355, L=4700       |       | kg        | 1      | 66,98    | 66,98   |                |                    |
| 3                |          | Ø88 9x5, S355, L=2573        |       | kg        | 2      | 26,50    | 53,00   |                |                    |
| 4                |          | Ø88 9x5, S355, L=1100        |       | kg        | 2      | 11,33    | 22,66   |                |                    |
| 5                |          | Ø88 9x5, S355, L=1012        |       | kg        | 2      | 10,42    | 20,84   |                |                    |
| 6                |          | -385x100x8, S355             |       | kg        | 4      | 1,75     | 7,00    |                |                    |
| 7                |          | -210x120x8, S355             |       | kg        | 2      | 1,58     | 3,16    |                |                    |
| 8                |          | -355x100x8, S355             |       | kg        | 4      | 1,55     | 6,20    |                |                    |
| 9                |          | -240x120x8, S355             |       | kg        | 2      | 1,81     | 3,62    |                |                    |
| 10               |          | -220x120x8, S355             |       | kg        | 4      | 1,66     | 6,64    |                |                    |
| 11               |          | -120x120x8, S355             |       | kg        | 4      | 0,91     | 3,64    |                |                    |
| 12               |          | -270x85x8, S355              |       | kg        | 4      | 0,79     | 3,16    |                |                    |
| Viso plieno, kg: |          |                              |       |           |        |          | 787,60  |                |                    |

MONOLITINIŲ LAIPTINIŲ/LIFTO ŠACHTŲ/STANDUMO SIENŲ SĄNAUDŲ KIEKIŲ ŽINIARAŠTIS

| Eil. Nr.                         | Pozicija | Pavadinimas                     | Žymuo | Mato vnt. | Kiekis | Sąnaudos |         | Svoris vnt., t | Papildomi duomenys |
|----------------------------------|----------|---------------------------------|-------|-----------|--------|----------|---------|----------------|--------------------|
|                                  |          |                                 |       |           |        | Vien.    | Iš viso |                |                    |
| 1                                |          | Laiptinės/lifto standumo sienos |       |           |        |          |         |                |                    |
| 2                                |          | Betonas C30/37 X0               |       | m³        | 1      | -        | 35,125  |                |                    |
| 3                                |          | Armatūra S500                   |       | kg        | 1      | -        | 3512,5  |                |                    |
| 4                                |          | Įdėtinų detalių plienas S355    |       | kg        | 1      | -        | 200,0   |                |                    |
| 5                                |          | Standumo bloko perdangos        |       |           |        |          |         |                |                    |
| 6                                |          | Betonas C30/37 X0               |       | m³        | 1      | -        | 3,750   |                |                    |
| 7                                |          | Armatūra S500                   |       | kg        | 1      | -        | 375,00  |                |                    |
| 8                                |          | Laiptai ir laiptų aikštelės     |       |           |        |          |         |                |                    |
| 9                                |          | Betonas C30/37 X0               |       | m³        | 1      | -        | 2,600   |                |                    |
| 10                               |          | Armatūra S500                   |       | kg        | 1      | -        | 260,00  |                |                    |
| Viso betono, m³:                 |          |                                 |       |           |        |          | 41,475  |                |                    |
| Viso armatūros, kg:              |          |                                 |       |           |        |          | 4147,5  |                |                    |
| Viso įdėtinų detalių plieno, kg: |          |                                 |       |           |        |          | 200,0   |                |                    |

|                      |                                                                                                                                |                                                                                                                                                                      |                                       |                                                                                                                       |         |                                              |
|----------------------|--------------------------------------------------------------------------------------------------------------------------------|----------------------------------------------------------------------------------------------------------------------------------------------------------------------|---------------------------------------|-----------------------------------------------------------------------------------------------------------------------|---------|----------------------------------------------|
| KVAL. PATV. DOK. NR. |                                                                                                                                | UAB "Konstrukcijų pasaulis"<br>Jonavos g. 260, Kaunas<br>Įm. k.: 304690224<br>Tel. +370 (613) 98089<br>El.p.: k.pazereckas@gmail.com<br>www.konstrukciju-pasaulis.lt |                                       | STATINIO PROJEKTO PAVADINIMAS<br>Negyvenamasis 2 aukštų klijuotosios medienos konstrukcijų mokslo paskirties pastatas |         |                                              |
|                      |                                                                                                                                | 37603                                                                                                                                                                | PDV                                   | Kęstutis Pažereckas                                                                                                   | 2018 08 | DOKUMENTO PAVADINIMAS<br>Pirmo aukšto planas |
|                      |                                                                                                                                | 37603                                                                                                                                                                | Konstr.                               | Kęstutis Pažereckas                                                                                                   | 2018 08 |                                              |
| LT                   | UŽSAKOVAS<br>Miškų institutas, Lietuvos agrarinių ir miškų mokslų centro filialas, Liepų g. 1, Girionių k., LT-53101, Kauno r. |                                                                                                                                                                      | BRĖŽINIO ŽYMUO<br>KPRS18/02-TP-SK-2.7 |                                                                                                                       |         | LAPAS<br>1                                   |
|                      |                                                                                                                                |                                                                                                                                                                      |                                       |                                                                                                                       |         | LAPŲ<br>1                                    |

KOLONOS TVIRTINIMO SU PAMATU IR RYŠIU  
MAZGAS MASTELIS 1:10

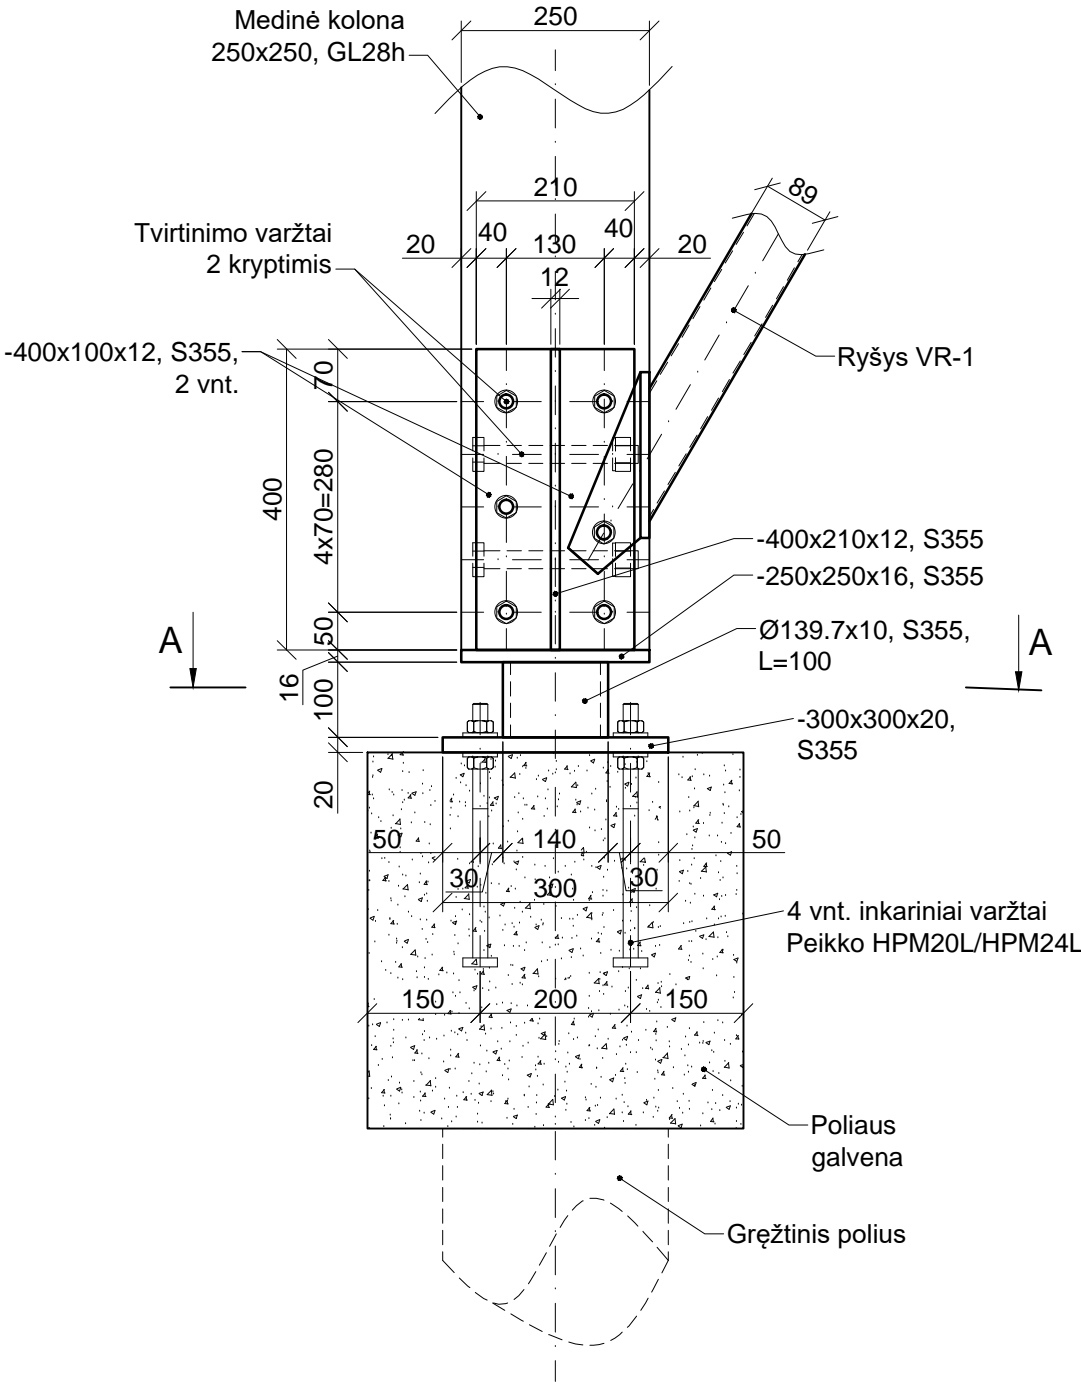

PJŪVIS A-A MASTELIS 1:10

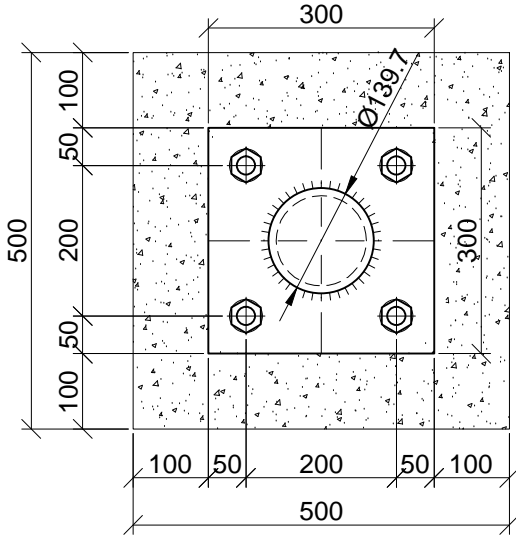

|                            |                                                                                                                   |                                                                                                                                       |         |                                                                                      |  |       |      |
|----------------------------|-------------------------------------------------------------------------------------------------------------------|---------------------------------------------------------------------------------------------------------------------------------------|---------|--------------------------------------------------------------------------------------|--|-------|------|
| KVAL.<br>PATV.<br>DOK. NR. |                              | UAB "Konstrukcijų pasaulis"                                                                                                           |         | STATINIO PROJEKTO PAVADINIMAS                                                        |  |       |      |
|                            |                                                                                                                   | Jonavos g. 260, Kaunas<br>Įm. k.: 304690224<br>Tel. +370 (613) 98089<br>El.p.: k.pazereckas@gmail.com<br>www.konstrukciju-pasaulis.lt |         | Negyvenamasis 2 aukštų klijuotosios medienos konstrukcijų mokslo paskirties pastatas |  |       |      |
|                            |                                                                                                                   |                                                                                                                                       |         |                                                                                      |  |       |      |
| 37603                      | PDV                                                                                                               | Kęstutis Pažereckas                                                                                                                   | 2018 08 | DOKUMENTO PAVADINIMAS<br>Kolonos tvirtinimo su pamatu ir ryšiu mazgas                |  | LAIDA |      |
| 37603                      | Konstr.                                                                                                           | Kęstutis Pažereckas                                                                                                                   | 2018 08 |                                                                                      |  | O     |      |
|                            |                                                                                                                   |                                                                                                                                       |         |                                                                                      |  |       |      |
| LT                         | UŽSAKOVAS                                                                                                         |                                                                                                                                       |         | BRĖŽINIO ŽYMUO<br><br>KPRS18/02-TP-SK-2.8                                            |  | LAPAS | LAPŲ |
|                            | Miškų institutas, Lietuvos agrarinių ir miškų mokslų centro filialas, Liepų g. 1, Girionių k., LT-53101, Kauno r. |                                                                                                                                       |         |                                                                                      |  | 1     | 1    |
|                            |                                                                                                                   |                                                                                                                                       |         |                                                                                      |  |       |      |



PIRMO AUKŠTO PERDANGOS SIJŲ PLANAS MASTELIS 1:100

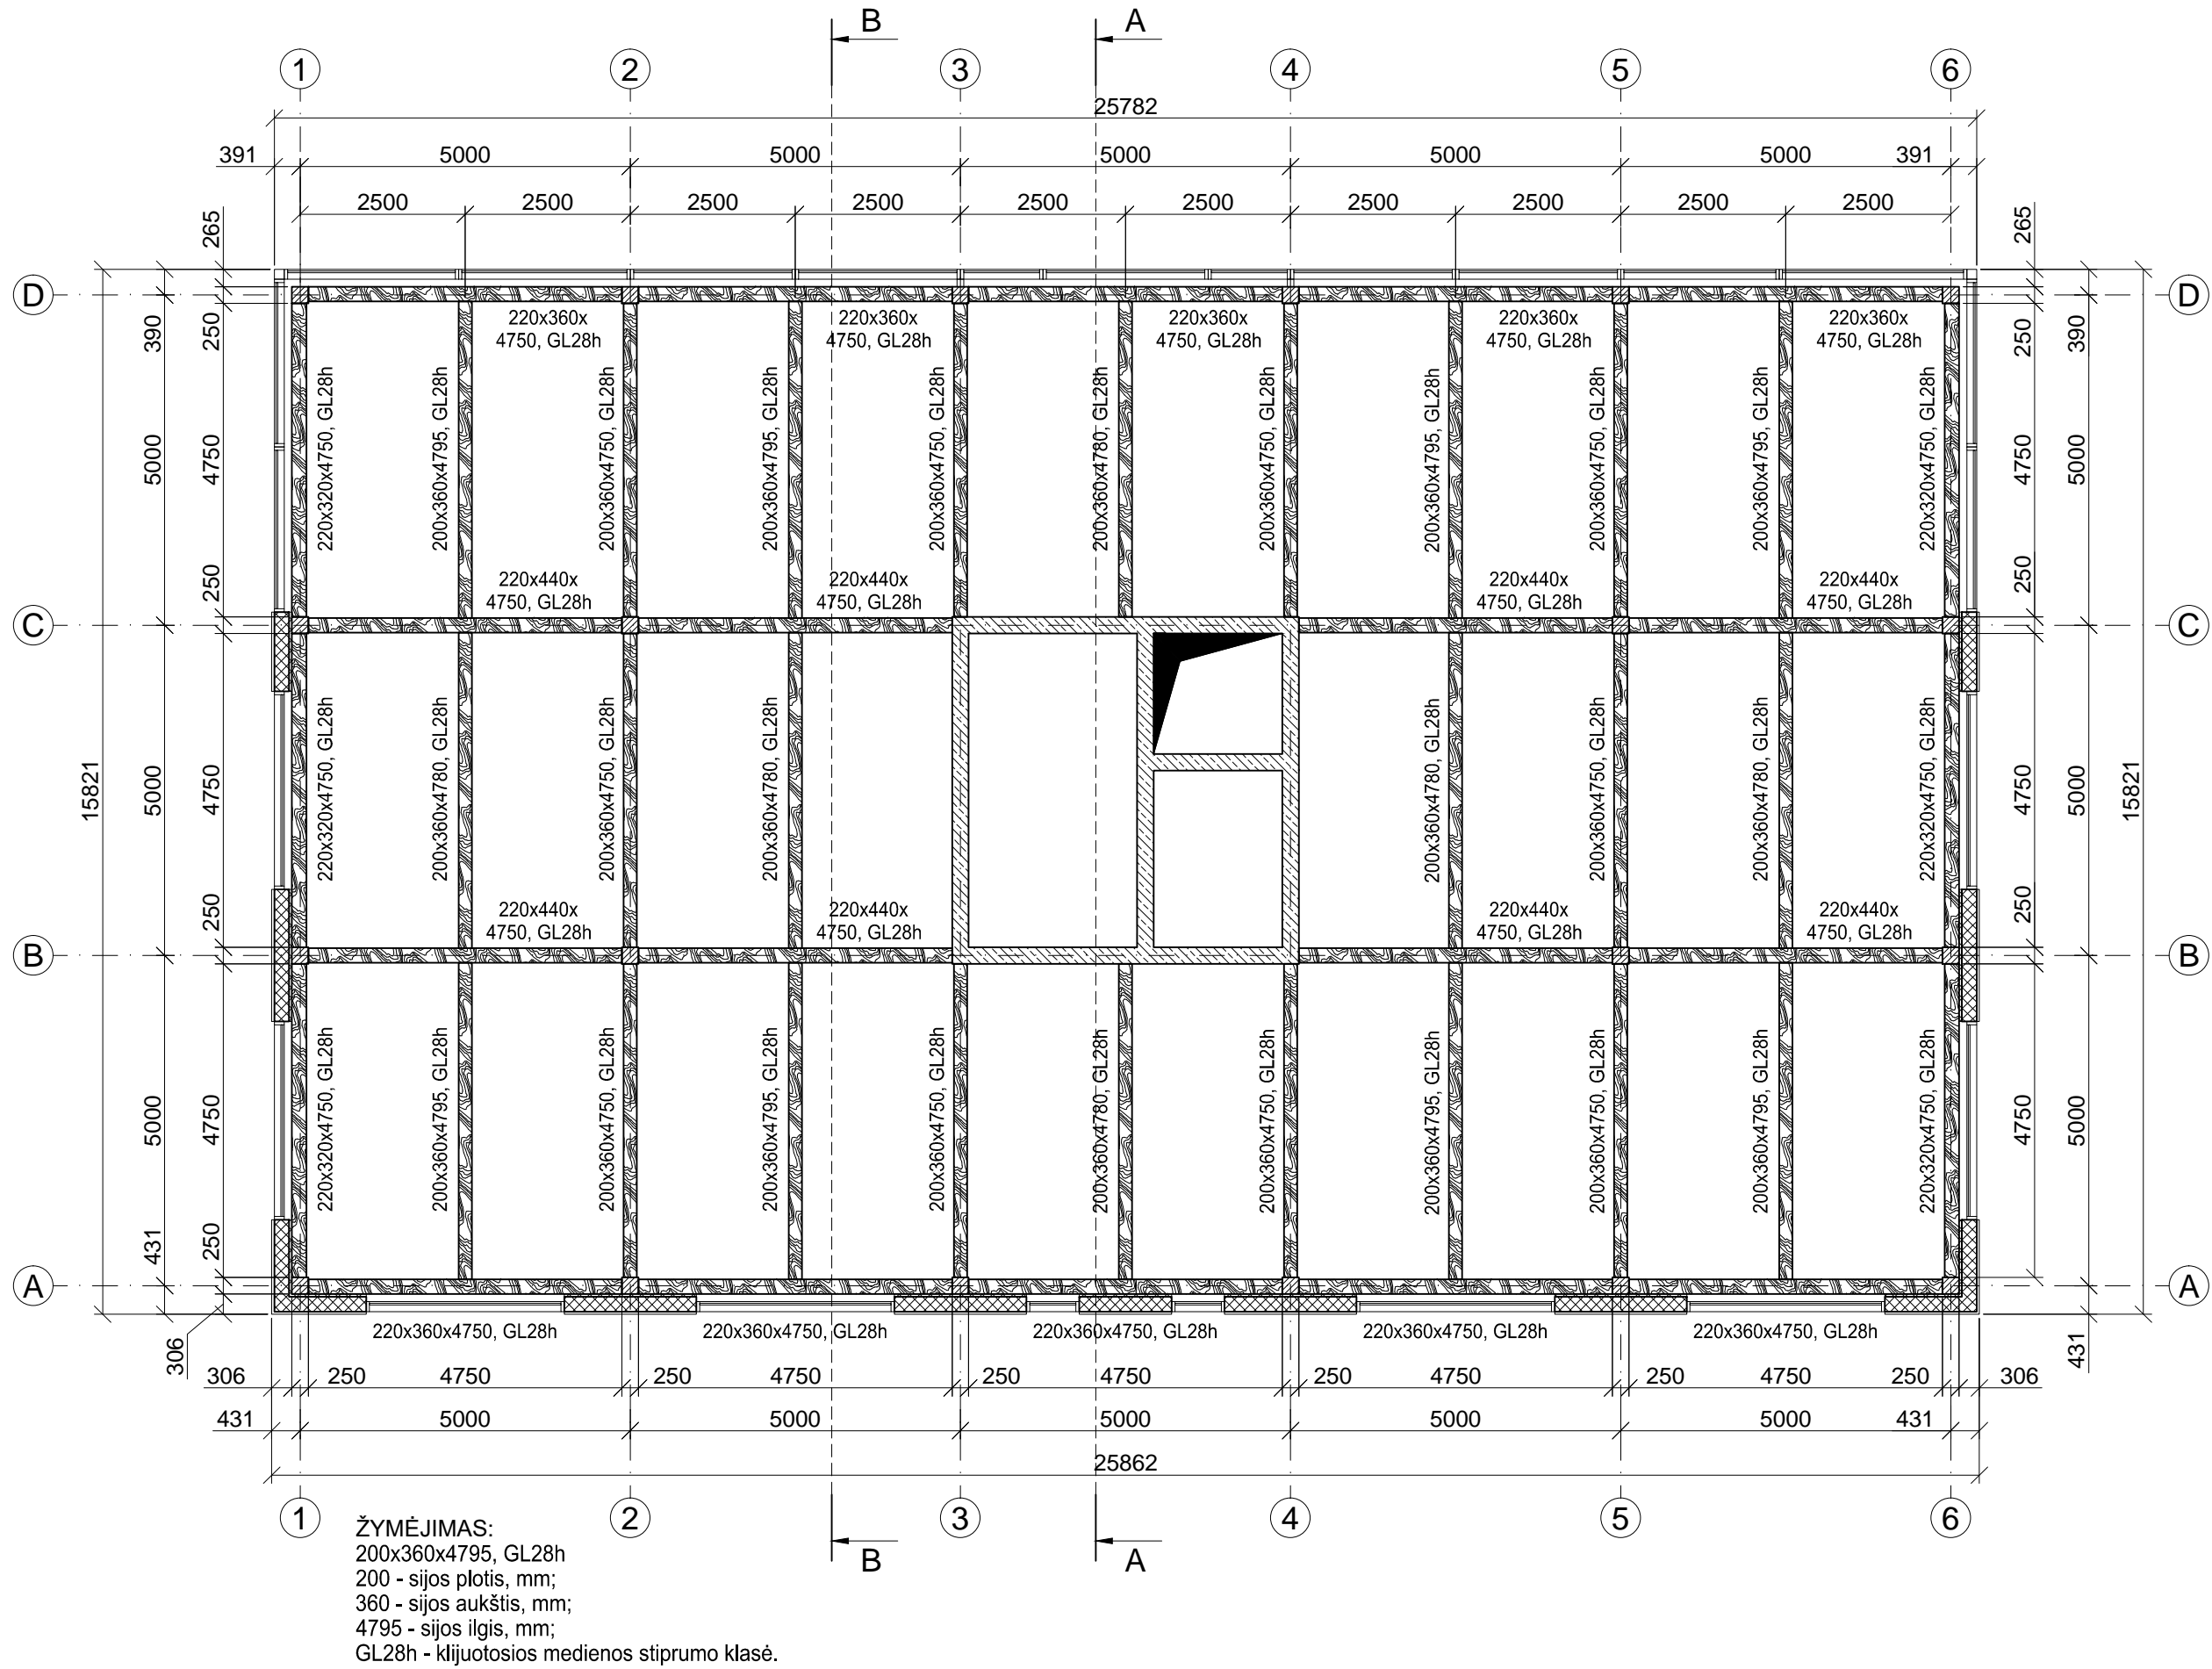

PASTABOS:

- Surenkamų medinių sijų montavimui ant kolonų naudojamos paslėptos plieninės jungtys ir į sijas bei kolonas įleidžiami varžtai.
- Surenkamų medinių sijų įdėtinės detalės projektuojamos darbo projekto stadijoje.
- Medinėms sijoms naudojama GL28h stiprumo klasės klijuotoji sluoksninė mediena.
- Medinių sijų atsparumas ugniai R60 min užtikrinamas skaičiavimais, papildomu apsauginiu medienos sluoksniu.
- Monolitinėms laiptinių ir lifto šachtų standumo sienoms naudojamas C30/37 X0 klasės betonas, pagal LST EN 206-1:2002.
- Monolitiniai elementai armuojami S500 stiprumo klasės armatūros tinklais ir/ar strypnais, pagal LST EN ISO 15630-1:2010.
- Metalinėms konstrukcijoms ir elementams naudojamas S355 stiprumo klasės plienas.
- Suvinirimo jungčių briaunų paruošimas turi būti atliekamas pagal EN ISO 9692-1.
- Metaliniai elementai tarpusavyje suvinunami, siūlės aukštis 1,2·kf - plonesniojo iš jungiamųjų elementų storis (jei nenurodyta kitaip), pagal LST EN ISO 9692-1:2004.
- Konstrukcijų suvinimui naudojamos suvinimo medžiagos užtikrinančios suvinimo siūlės skaičiuojamuosius stiprius ne mažesnius nei suvinamo metalo.
- Metaliniai paviršiai gruntuojami ir dažomi, pagal LST EN ISO 12944-2:2000.
- Skylės varžtams daromos 2 mm didesnės nei varžto diameteras (jei brėžinyje nenurodyta kitaip).
- Darbai vykdomi pagal darbo projektą.

PJŪVIS B-B MASTELIS 1:10

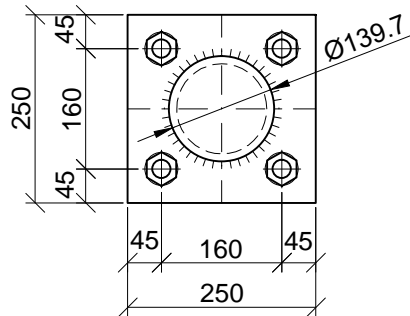

MEDINIŲ 1 AUKŠTO SIJŲ SĄNAUDŲ KIEKIŲ ŽINIARAŠTIS

| Eil. Nr.                         | Pozicija | Pavadinimas                  | Žymuo | Mato vnt. | Kiekis | Sąnaudos Vien. | Iš viso | Svoris vnt., t | Papildomi duomenys |
|----------------------------------|----------|------------------------------|-------|-----------|--------|----------------|---------|----------------|--------------------|
| 1                                |          | Sija 220x360x4750, GL28h     |       |           |        |                |         |                |                    |
| 2                                |          | Klijuota mediena GL28h       |       | m³        | 10     | 0.376          | 3.760   |                |                    |
| 3                                |          | Įdėtinų detalių plienas S355 |       | kg        | 10     | 20.00          | 200.00  |                |                    |
| 4                                |          | Sija 220x320x4750, GL28h     |       |           |        |                |         |                |                    |
| 5                                |          | Klijuota mediena GL28h       |       | m³        | 6      | 0.334          | 2.004   |                |                    |
| 6                                |          | Įdėtinų detalių plienas S355 |       | kg        | 6      | 10.00          | 60.00   |                |                    |
| 7                                |          | Sija 200x440x4750, GL28h     |       |           |        |                |         |                |                    |
| 8                                |          | Klijuota mediena GL28h       |       | m³        | 8      | 0.418          | 3.344   |                |                    |
| 9                                |          | Įdėtinų detalių plienas S355 |       | kg        | 8      | 30.00          | 240.00  |                |                    |
| 10                               |          | Sija 200x360x4750, GL28h     |       |           |        |                |         |                |                    |
| 11                               |          | Klijuota mediena GL28h       |       | m³        | 10     | 0.342          | 3.420   |                |                    |
| 12                               |          | Sija 200x360x4780, GL28h     |       |           |        |                |         |                |                    |
| 13                               |          | Klijuota mediena GL28h       |       | m³        | 6      | 0.344          | 2.064   |                |                    |
| 14                               |          | Sija 200x360x4795, GL28h     |       |           |        |                |         |                |                    |
| 15                               |          | Klijuota mediena GL28h       |       | m³        | 8      | 0.345          | 2.760   |                |                    |
| Viso klijuotos medienos, m³:     |          |                              |       |           |        |                | 17.352  |                |                    |
| Viso įdėtinų detalių plieno, kg: |          |                              |       |           |        |                | 500.0   |                |                    |

KOLONOS TVIRTINIMO SU KOLONA, SIJA IR RYŠIAIS MAZGAS MASTELIS 1:10

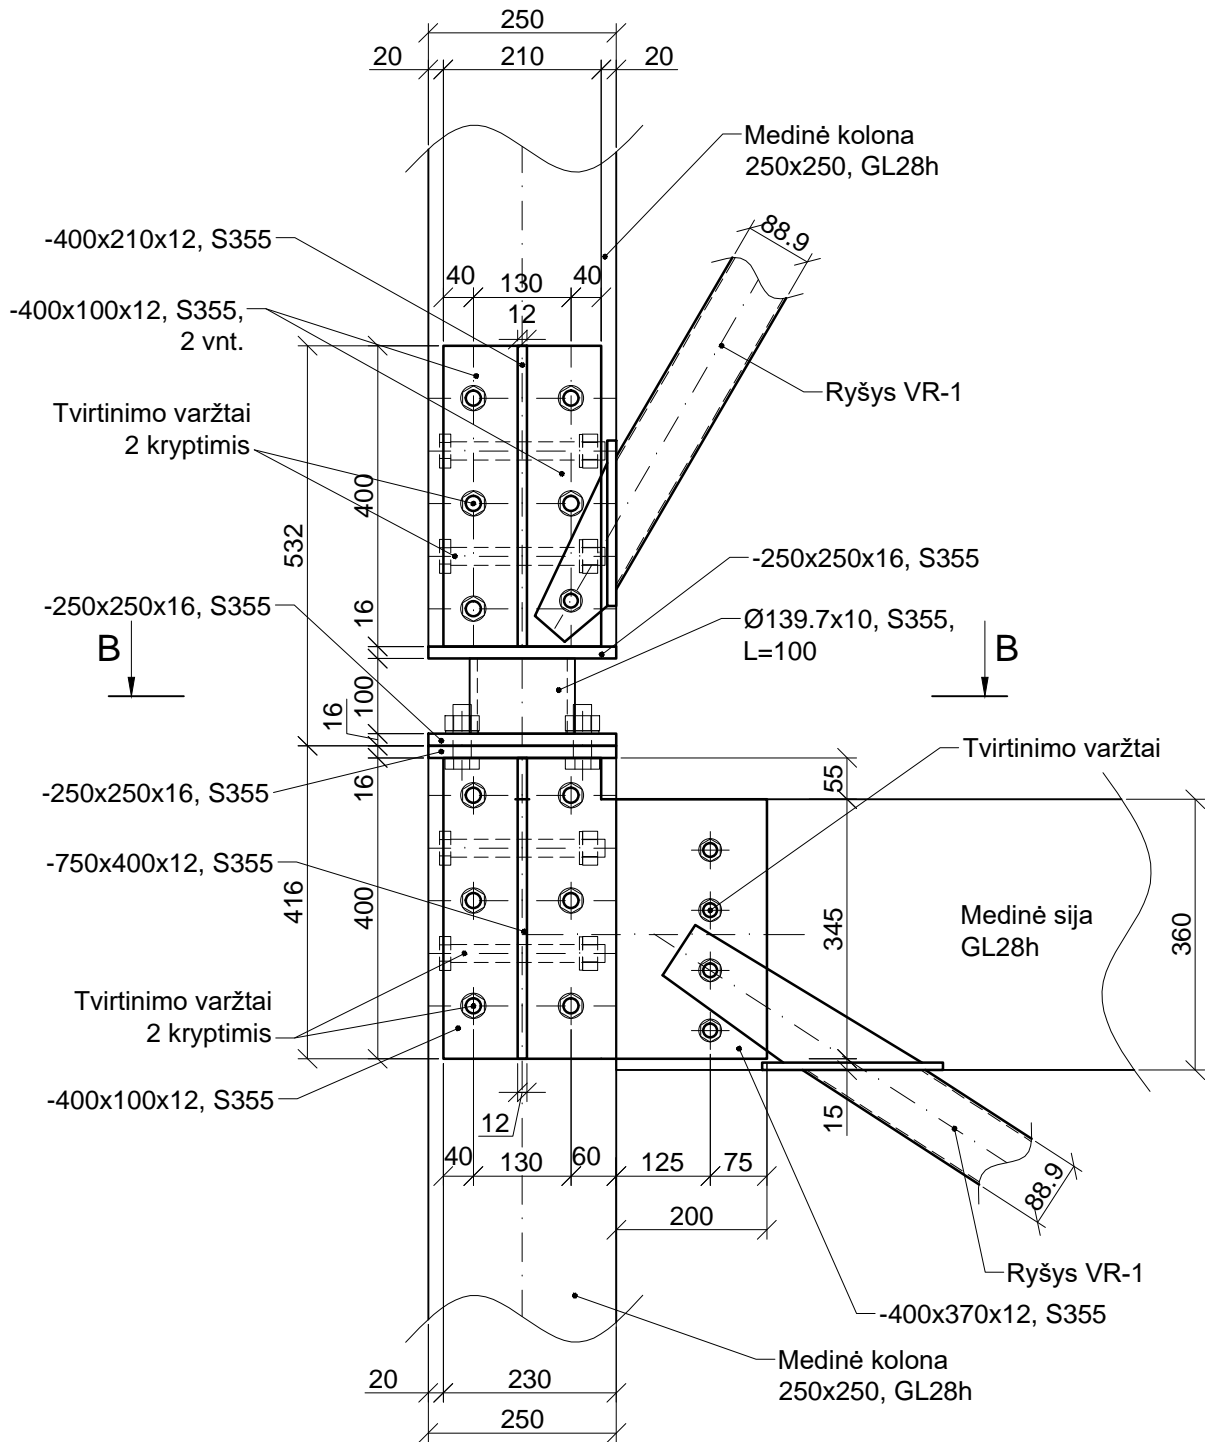

|                            |                                                                                                                                |                                                                                                                                                                      |         |                     |                                                                                                                       |                                                             |  |       |      |
|----------------------------|--------------------------------------------------------------------------------------------------------------------------------|----------------------------------------------------------------------------------------------------------------------------------------------------------------------|---------|---------------------|-----------------------------------------------------------------------------------------------------------------------|-------------------------------------------------------------|--|-------|------|
| KVAL.<br>PATV.<br>DOK. NR. |                                                                                                                                | UAB "Konstrukcijų pasaulis"<br>Jonavos g. 260, Kaunas<br>Įm. k.: 304690224<br>Tel. +370 (613) 98089<br>El.p.: k.pazereckas@gmail.com<br>www.konstrukciju-pasaulis.lt |         |                     | STATINIO PROJEKTO PAVADINIMAS<br>Negyvenamasis 2 aukštų klijuotosios medienos konstrukcijų mokslo paskirties pastatas |                                                             |  |       |      |
|                            |                                                                                                                                | 37603                                                                                                                                                                | PDV     | Kęstutis Pažereckas | 2018 08                                                                                                               | DOKUMENTO PAVADINIMAS<br>Pirmo aukšto perdangos sijų planas |  | LAIDA |      |
|                            |                                                                                                                                | 37603                                                                                                                                                                | Konstr. | Kęstutis Pažereckas | 2018 08                                                                                                               |                                                             |  | O     |      |
|                            |                                                                                                                                |                                                                                                                                                                      |         |                     |                                                                                                                       |                                                             |  |       |      |
| LT                         | UŽSAKOVAS<br>Miškų institutas, Lietuvos agrarinių ir miškų mokslų centro filialas, Liepų g. 1, Girionių k., LT-53101, Kauno r. |                                                                                                                                                                      |         |                     | BRĖŽINIO ŽYMUO<br>KPRS18/02-TP-SK-2.9                                                                                 |                                                             |  | LAPAS | LAPŲ |
|                            |                                                                                                                                |                                                                                                                                                                      |         |                     |                                                                                                                       |                                                             |  | 1     | 1    |
|                            |                                                                                                                                |                                                                                                                                                                      |         |                     |                                                                                                                       |                                                             |  |       |      |

PIRMO AUKŠTO PERDANGOS ILGINIŲ (PASKIRSTOMŲJŲ SIJŲ) PLANAS MASTELIS 1:100

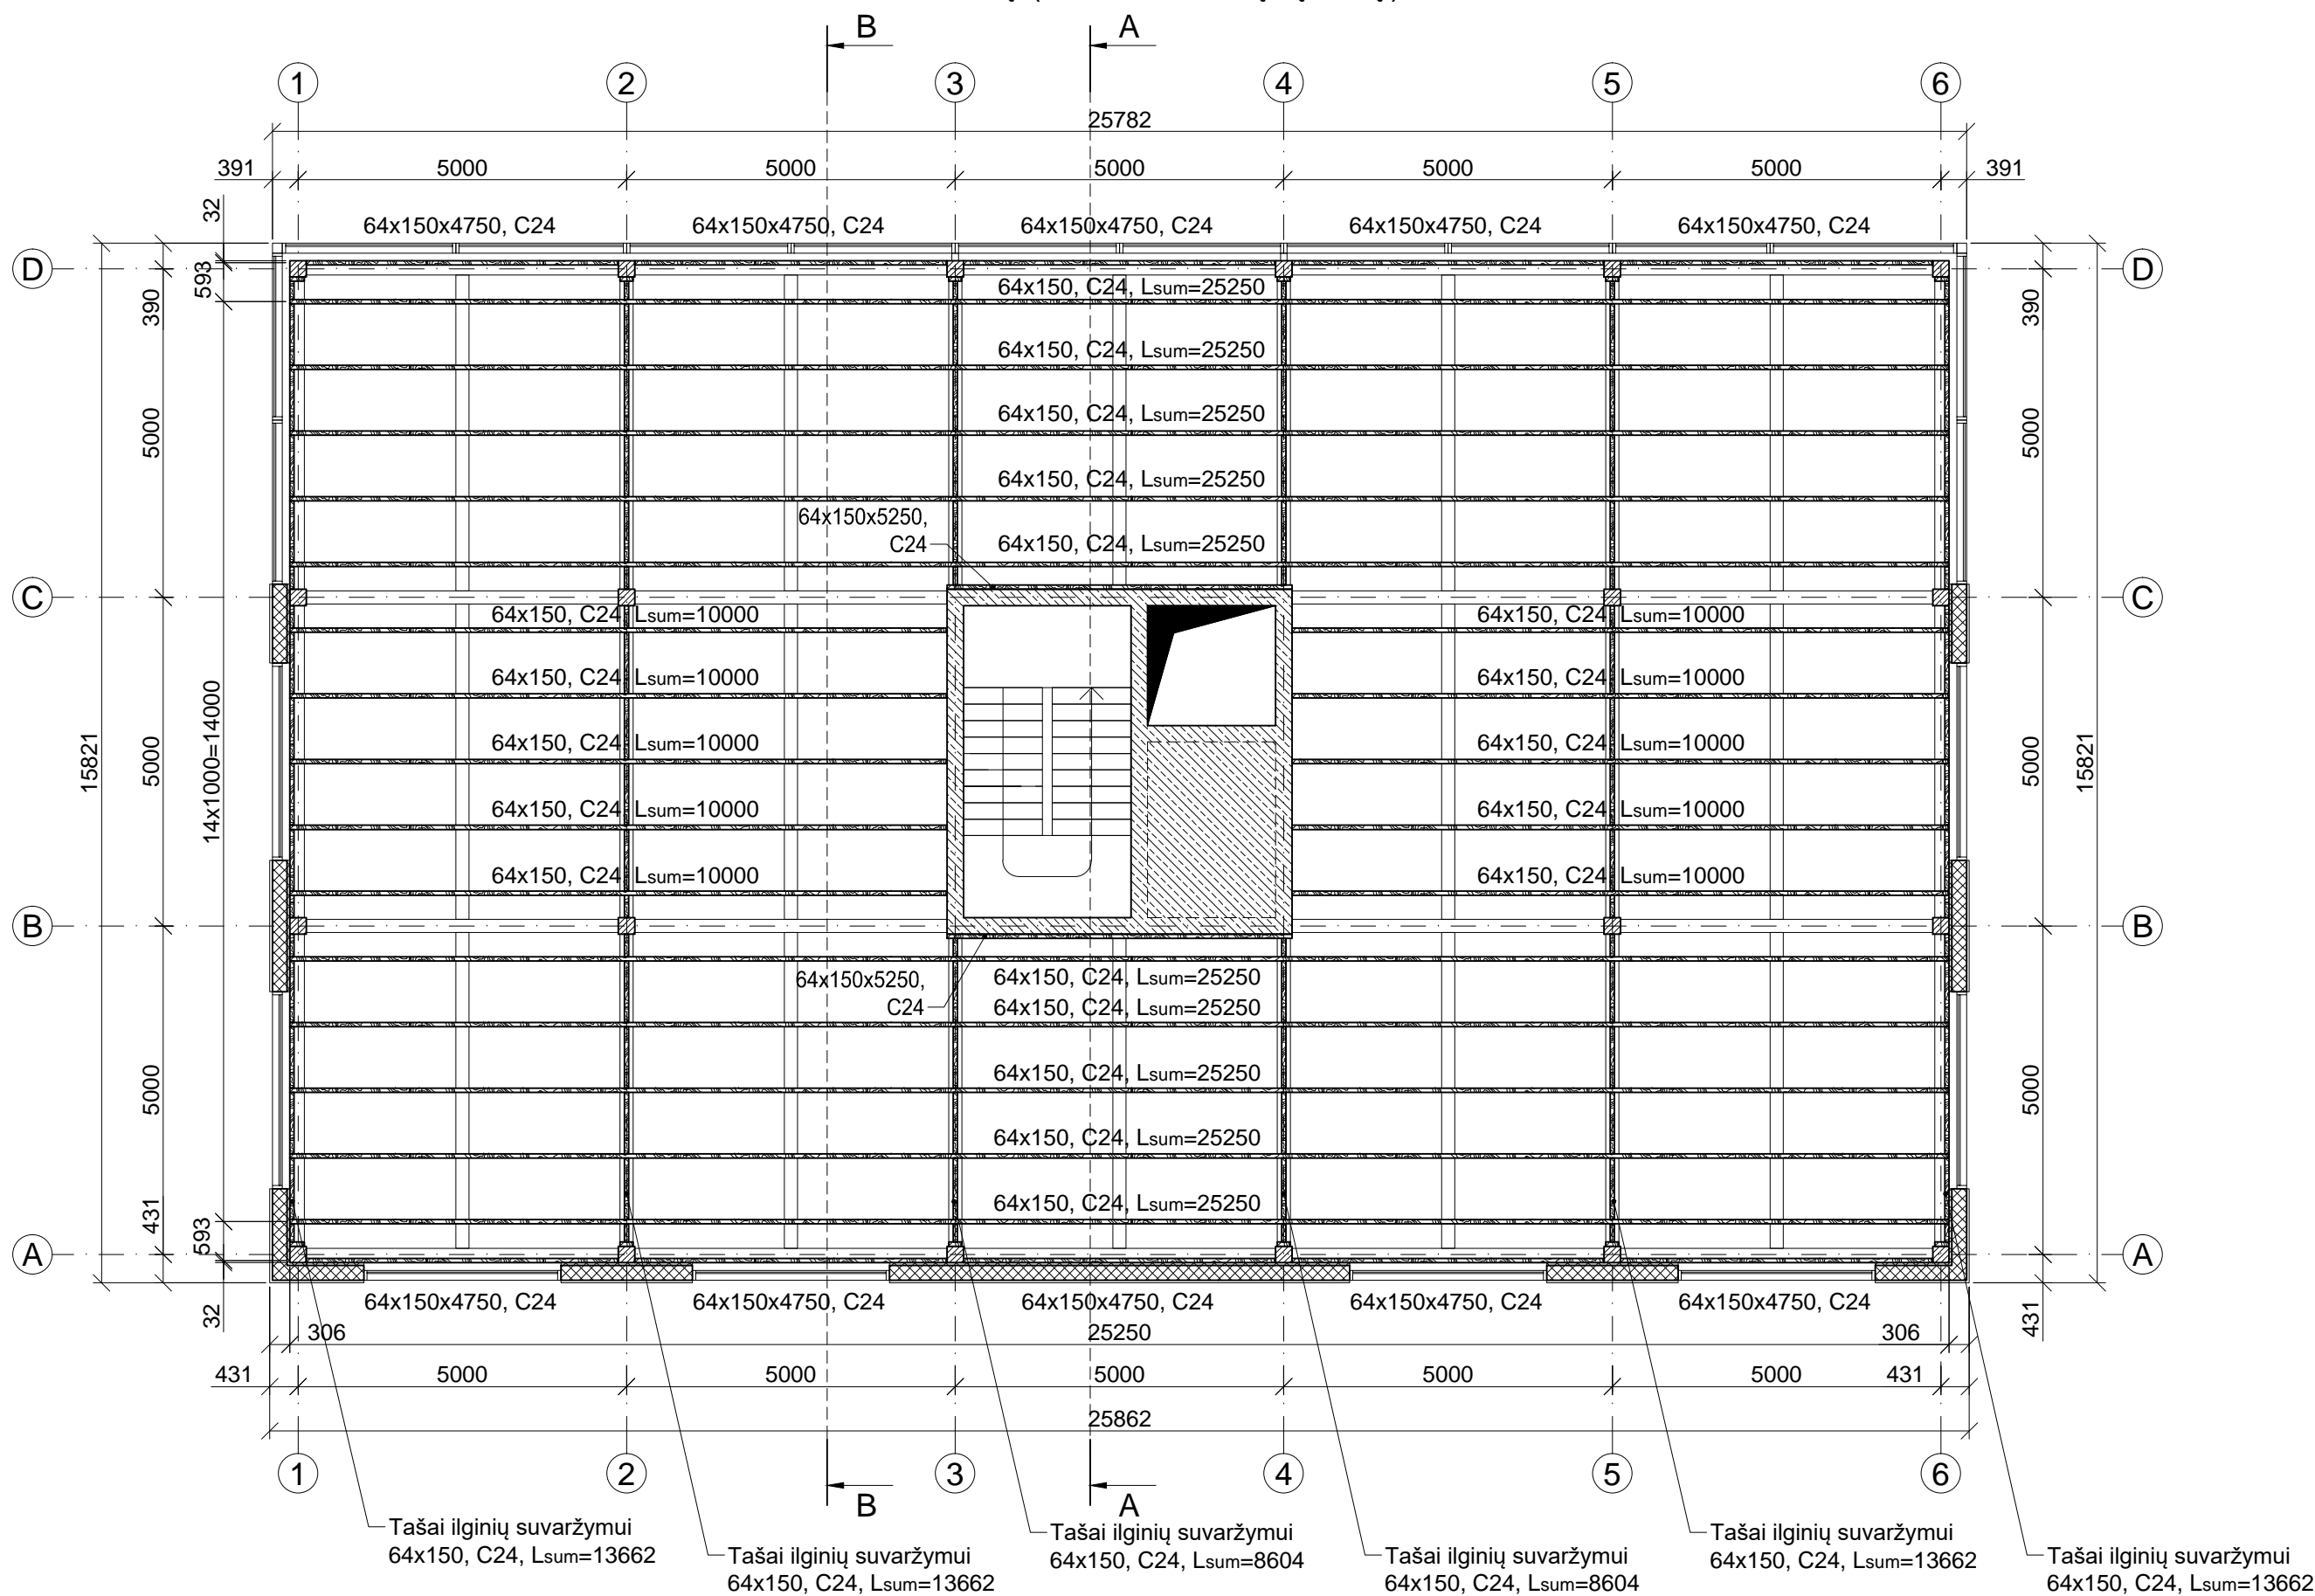

1 AUKŠTO PERDANGOS ILGINIŲ IR PAKLOTO SĄNAUDŲ KIEKIŲ ŽINIARAŠTIS

| Eil. Nr.                     | Pozicija | Pavadinimas              | Žymuo | Mato vnt. | Kiekis | Sąnaudos Vien. | Iš viso | Svoris vnt., t | Papildomi duomenys |
|------------------------------|----------|--------------------------|-------|-----------|--------|----------------|---------|----------------|--------------------|
| 1                            |          | Ilginis 64x150x25250     |       |           |        |                |         |                |                    |
| 2                            |          | Pjautinė mediena C24     |       | m³        | 10     | 0.267          | 2.670   |                |                    |
| 3                            |          | Ilginis 64x150x10000     |       |           |        |                |         |                |                    |
| 4                            |          | Pjautinė mediena C24     |       | m³        | 10     | 0.106          | 1.060   |                |                    |
| 5                            |          | Ilginis 64x150x5250      |       |           |        |                |         |                |                    |
| 6                            |          | Pjautinė mediena C24     |       | m³        | 2      | 0.051          | 0.102   |                |                    |
| 7                            |          | Ilginis 64x150x4750      |       |           |        |                |         |                |                    |
| 8                            |          | Pjautinė mediena C24     |       | m³        | 10     | 0.046          | 0.460   |                |                    |
| 9                            |          | Pagalbiniai tašai 64x150 |       |           |        |                |         |                |                    |
| 10                           |          | Pjautinė mediena C24     |       | m³        | -      | -              | 0.700   |                |                    |
| 11                           |          | Lentų paklotas           |       |           |        |                |         |                |                    |
| 12                           |          | Pjautinė mediena C24     |       | m³        | -      | -              | 8.950   |                |                    |
| Viso pjautinės medienos, m³: |          |                          |       |           |        |                | 13.942  |                |                    |

PASTABOS:

- Medinių paskirstomųjų ilginių ir pagalbinių tašų gamybai naudojama C24 stiprumo klasės vientisoji spygliuočių mediena.
- Ilginių montavimui ant sijų naudojamos standartizuotos plieninės detalės ir sraigtinės vinys, bei medisraigčiai.
- Monolitinėms laiptinių ir lifto šachtų standumo sienoms naudojamas C30/37 X0 klasės betonas, pagal LST EN 206-1:2002.
- Monolitiniai elementai armuojami S500 stiprumo klasės armatūros tinklais ir/ar strypynais, pagal LST EN ISO 15630-1:2010.
- Metalinėms konstrukcijoms ir elementams naudojamas S355 stiprumo klasės plienas.
- Suvirinimo jungčių briaunų paruošimas turi būti atliekamas pagal EN ISO 9692-1.
- Metaliniai elementai tarpusavyje suvirinami, siūlės aukštis 1,2·kf - plonesniojo iš jungiamųjų elementų storis (jei nenurodyta kitaip), pagal LST EN ISO 9692-1:2004.
- Konstrukcijų suvirinimui naudojamos suvirinimo medžiagos užtikrinančios suvirinimo siūlės skaičiuojamuosius stiprius ne mažesnius nei suvirinamo metalo.
- Metaliniai paviršiai gruntuojami ir dažomi, pagal LST EN ISO 12944-2:2000.
- Skylės varžtams daromos 2 mm didesnės nei varžto diameteras (jei brėžinyje nenurodyta kitaip).
- Darbai vykdomi pagal darbo projektą.

|                            |                                                                                                                   |                                                                                                                                       |         |                                                            |                                                                                      |                       |       |
|----------------------------|-------------------------------------------------------------------------------------------------------------------|---------------------------------------------------------------------------------------------------------------------------------------|---------|------------------------------------------------------------|--------------------------------------------------------------------------------------|-----------------------|-------|
| KVAL.<br>PATV.<br>DOK. NR. |                                                                                                                   | UAB "Konstrukcijų pasaulis"                                                                                                           |         |                                                            | STATINIO PROJEKTO PAVADINIMAS                                                        |                       |       |
|                            |                                                                                                                   | Jonavos g. 260, Kaunas<br>Įm. k.: 304690224<br>Tel. +370 (613) 98089<br>El.p.: k.pazereckas@gmail.com<br>www.konstrukciju-pasaulis.lt |         |                                                            | Negyvenamasis 2 aukštų klijuotosios medienos konstrukcijų mokslo paskirties pastatas |                       |       |
|                            |                                                                                                                   | 37603                                                                                                                                 | PDV     | Kęstutis Pažereckas                                        | 2018 08                                                                              | DOKUMENTO PAVADINIMAS |       |
| 37603                      | Konstr.                                                                                                           | Kęstutis Pažereckas                                                                                                                   | 2018 08 | Pirmo aukšto perdangos ilginių (paskirstomųjų sijų) planas |                                                                                      |                       | LAIDA |
|                            |                                                                                                                   |                                                                                                                                       |         |                                                            |                                                                                      |                       | O     |
| LT                         | UŽSAKOVAS                                                                                                         |                                                                                                                                       |         |                                                            | BRĖŽINIO ŽYMUO                                                                       |                       |       |
|                            | Miškų institutas, Lietuvos agrarinių ir miškų mokslų centro filialas, Liepų g. 1, Girionių k., LT-53101, Kauno r. |                                                                                                                                       |         |                                                            | KPRS18/02-TP-SK-2.10                                                                 |                       |       |
|                            |                                                                                                                   |                                                                                                                                       |         |                                                            |                                                                                      |                       |       |
|                            |                                                                                                                   |                                                                                                                                       |         |                                                            | LAPAS                                                                                | LAPŲ                  |       |
|                            |                                                                                                                   |                                                                                                                                       |         |                                                            | 1                                                                                    | 1                     |       |



ANTRO AUKŠTO PLANAS MASTELIS 1:100

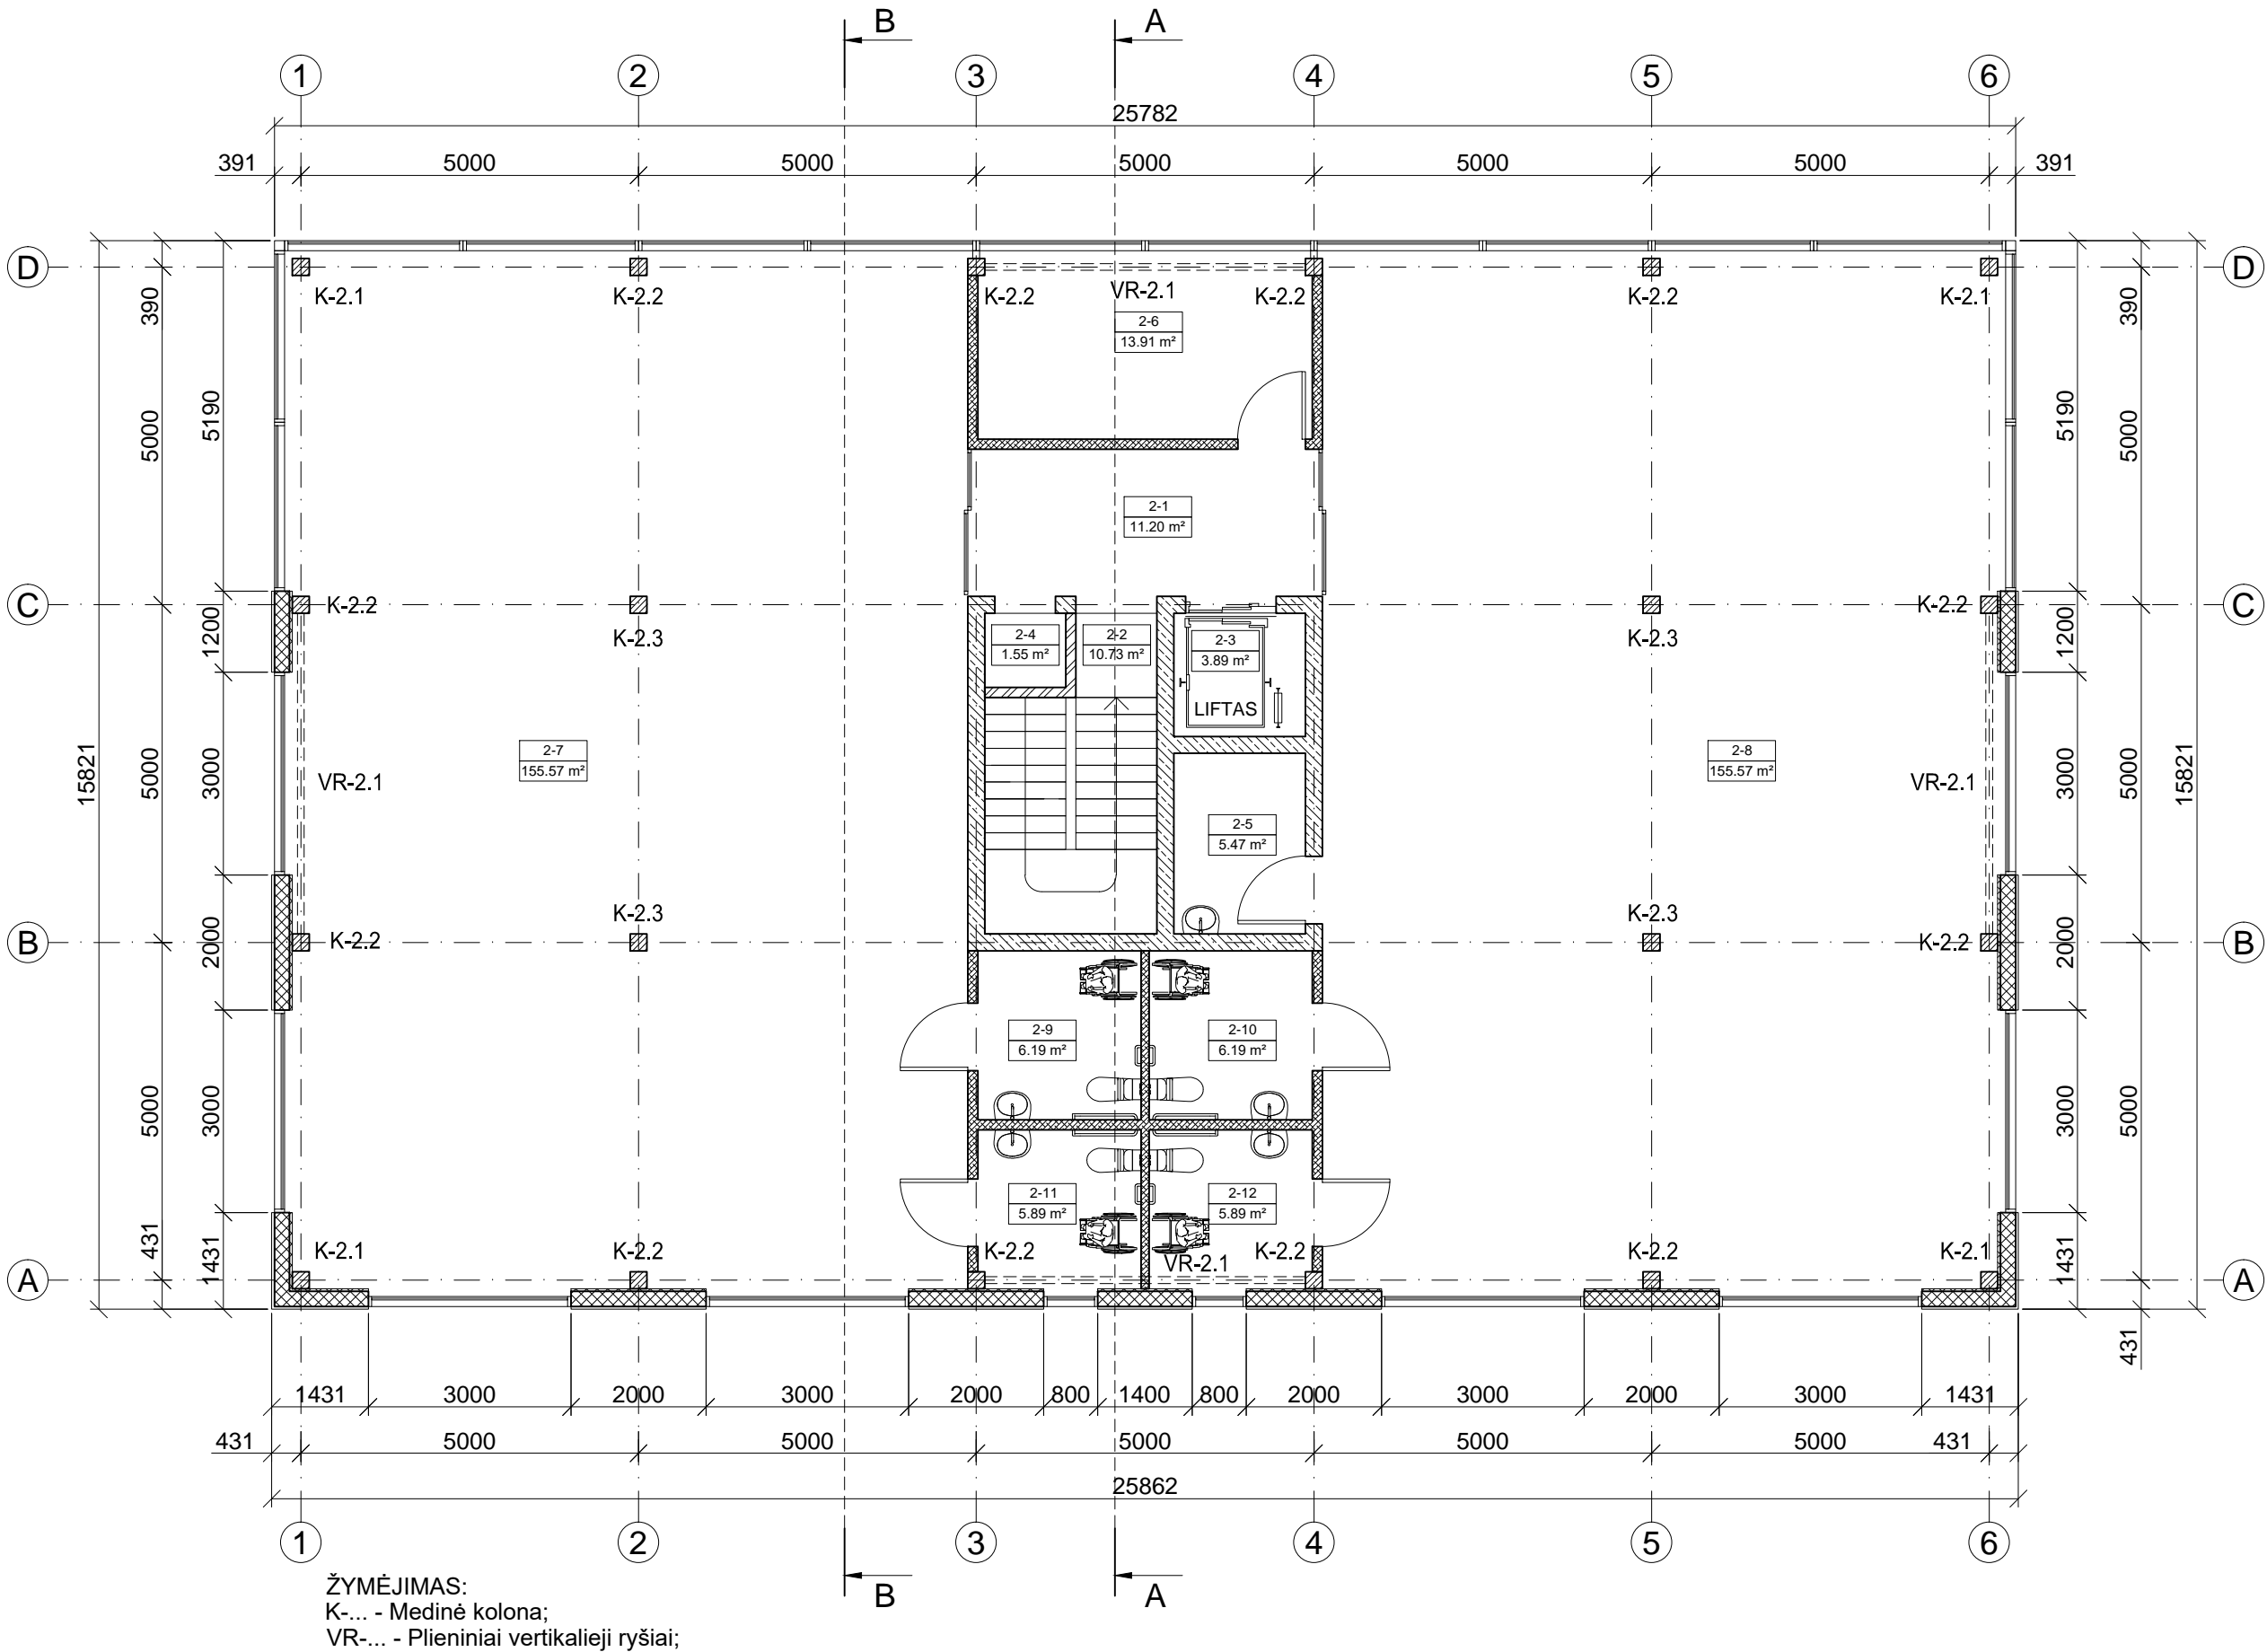

| Patalpų eksplikacija |                  |           |
|----------------------|------------------|-----------|
| Numeris              | Patalpa          | Plotas    |
| 2-1                  | Fojė             | 11.20 m²  |
| 2-2                  | Laiptinė         | 10.73 m²  |
| 2-3                  | Lifto šachta     | 3.89 m²   |
| 2-4                  | Tech. patalpa    | 1.55 m²   |
| 2-5                  | Tech. patalpa    | 5.47 m²   |
| 2-6                  | Tech. patalpa    | 13.91 m²  |
| 2-7                  | Ištaigų patalpos | 155.57 m² |
| 2-8                  | Ištaigų patalpos | 155.57 m² |
| 2-9                  | San. mazgas      | 6.19 m²   |
| 2-10                 | San. mazgas      | 6.19 m²   |
| 2-11                 | San. mazgas      | 5.89 m²   |
| 2-12                 | San. mazgas      | 5.89 m²   |
| Viso aukšte:         |                  | 382.05 m² |
| Viso pastate:        |                  | 764.84 m² |

- PASTABOS:
- Medinių kolonų tarpusavio sujungimams naudojamos įdėtinės plieninės kolonų detalės ir varžtai.
  - Medinių kolonų įdėtinės detalės projektuojamos darbo projekto stadijoje.
  - Kolonoms naudojama GL28h stiprumo klasės klijuotoji sluoksнинė mediena.
  - Medinių kolonų atsparumas ugniai R60 min užtikrinamas skaičiavimais, papildomu apsauginiu medienos sluoksniu.
  - Monolitinėms laiptinių ir lifto šachtų standumo sienoms naudojamas C30/37 X0 klasės betonas, pagal LST EN 206-1:2002.
  - Monolitiniai elementai armuojami S500 stiprumo klasės armatūros tinklais ir/ar strypynais, pagal LST EN ISO 15630-1:2010.
  - Metalinėms konstrukcijoms ir elementams naudojamas S355 stiprumo klasės plienas.
  - Suvirinimo jungčių briaunų paruošimas turi būti atliekamas pagal EN ISO 9692-1.
  - Metaliniai elementai tarpusavyje suvirinami, siūlės aukštis 1,2-kf - plonesniojo iš jungiamųjų elementų storis (jei nenurodyta kitaip), pagal LST EN ISO 9692-1:2004.
  - Konstrukcijų suvirinimui naudojamos suvirinimo medžiagos užtikrinančios suvirinimo siūlės skaičiuojamuosius stiprius ne mažesnius nei suvirinamo metalo.
  - Metaliniai paviršiai gruntuojami ir dažomi, pagal LST EN ISO 12944-2:2000.
  - Skylės varžtams daromos 2 mm didesnės nei varžto diameteras (jei brėžinyje nenurodyta kitaip).
  - Darbai vykdomi pagal darbo projektą.

MEDINIŲ ANTRO AUKŠTO KOLONŲ SĄNAUDŲ KIEKIŲ ŽINIARAŠTIS

| Eil. Nr.                         | Pozicija | Pavadinimas                  | Žymuo | Mato vnt. | Kiekis | Sąnaudos |         | Svoris vnt., t | Papildomi duomenys |
|----------------------------------|----------|------------------------------|-------|-----------|--------|----------|---------|----------------|--------------------|
|                                  |          |                              |       |           |        | Vien.    | Iš viso |                |                    |
| 1                                | K-2.1    | Kolona 250x250x3430          |       |           |        |          |         |                |                    |
| 2                                |          | Klijuota mediena GL28h       |       | m³        | 4      | 0.206    | 0.824   |                |                    |
| 3                                |          | Jungimo detalių plienas S355 |       | kg        | 4      | 70.00    | 280.00  |                |                    |
| 4                                | K-2.2    | Kolona 250x250x3430          |       |           |        |          |         |                |                    |
| 5                                |          | Klijuota mediena GL28h       |       | m³        | 12     | 0.206    | 2.472   |                |                    |
| 6                                |          | Jungimo detalių plienas S355 |       | kg        | 12     | 80.00    | 960.00  |                |                    |
| 7                                | K-2.3    | Kolona 250x250x3430          |       |           |        |          |         |                |                    |
| 8                                |          | Klijuota mediena GL28h       |       | m³        | 4      | 0.206    | 0.824   |                |                    |
| 9                                |          | Jungimo detalių plienas S355 |       | kg        | 4      | 85.00    | 340.00  |                |                    |
| Viso klijuotos medienos, m³:     |          |                              |       |           |        |          | 4.120   |                |                    |
| Viso jungimo detalių plieno, kg: |          |                              |       |           |        |          | 1580.0  |                |                    |

ANTRO AUKŠTO PLIENINIŲ RYŠIŲ SĄNAUDŲ KIEKIŲ ŽINIARAŠTIS

| Eil. Nr.         | Pozicija | Pavadinimas                  | Žymuo | Mato vnt. | Kiekis | Sąnaudos |         | Svoris vnt., t | Papildomi duomenys |
|------------------|----------|------------------------------|-------|-----------|--------|----------|---------|----------------|--------------------|
|                  |          |                              |       |           |        | Vien.    | Iš viso |                |                    |
| 1                | VR-2.1   | Plieniniai vertikalūs ryšiai |       | vnt.      | 4      | 196.90   | 787.60  |                |                    |
| 2                |          | Ø101.6x6, S355, L=4700       |       | kg        | 1      | 66.98    | 66.98   |                |                    |
| 3                |          | Ø88.9x5, S355, L=2573        |       | kg        | 2      | 26.50    | 53.00   |                |                    |
| 4                |          | Ø88.9x5, S355, L=1100        |       | kg        | 2      | 11.33    | 22.66   |                |                    |
| 5                |          | Ø88.9x5, S355, L=1012        |       | kg        | 2      | 10.42    | 20.84   |                |                    |
| 6                |          | -385x100x8, S355             |       | kg        | 4      | 1.75     | 7.00    |                |                    |
| 7                |          | -210x120x8, S355             |       | kg        | 2      | 1.58     | 3.16    |                |                    |
| 8                |          | -355x100x8, S355             |       | kg        | 4      | 1.55     | 6.20    |                |                    |
| 9                |          | -240x120x8, S355             |       | kg        | 2      | 1.81     | 3.62    |                |                    |
| 10               |          | -220x120x8, S355             |       | kg        | 4      | 1.66     | 6.64    |                |                    |
| 11               |          | -120x120x8, S355             |       | kg        | 4      | 0.91     | 3.64    |                |                    |
| 12               |          | -270x85x8, S355              |       | kg        | 4      | 0.79     | 3.16    |                |                    |
| Viso plieno, kg: |          |                              |       |           |        |          | 787.60  |                |                    |

|                            |                                                                                                                                |                                                                                                                                                                      |         |                     |                                                                                                                       |                                              |  |       |      |
|----------------------------|--------------------------------------------------------------------------------------------------------------------------------|----------------------------------------------------------------------------------------------------------------------------------------------------------------------|---------|---------------------|-----------------------------------------------------------------------------------------------------------------------|----------------------------------------------|--|-------|------|
| KVAL.<br>PATV.<br>DOK. NR. |                                           | UAB "Konstrukcijų pasaulis"<br>Jonavos g. 260, Kaunas<br>Įm. k.: 304690224<br>Tel. +370 (613) 98089<br>El.p.: k.pazereckas@gmail.com<br>www.konstrukciju-pasaulis.lt |         |                     | STATINIO PROJEKTO PAVADINIMAS<br>Negyvenamasis 2 aukštų klijuotosios medienos konstrukcijų mokslo paskirties pastatas |                                              |  |       |      |
|                            |                                                                                                                                | 37603                                                                                                                                                                | PDV     | Kęstutis Pažereckas | 2018 08                                                                                                               | DOKUMENTO PAVADINIMAS<br>Antro aukšto planas |  | LAIDA |      |
|                            |                                                                                                                                | 37603                                                                                                                                                                | Konstr. | Kęstutis Pažereckas | 2018 08                                                                                                               |                                              |  | O     |      |
|                            |                                                                                                                                |                                                                                                                                                                      |         |                     | BREŽINIO ŽYMUO                                                                                                        |                                              |  | LAPAS | LAPŲ |
| LT                         | UŽSAKOVAS<br>Miškų institutas, Lietuvos agrarinių ir miškų mokslų centro filialas, Liepų g. 1, Girionių k., LT-53101, Kauno r. |                                                                                                                                                                      |         |                     | KPRS18/02-TP-SK-2.11                                                                                                  |                                              |  | 1     | 1    |
|                            |                                                                                                                                |                                                                                                                                                                      |         |                     |                                                                                                                       |                                              |  |       |      |



DENGINIO SIJŲ PLANAS MASTELIS 1:100

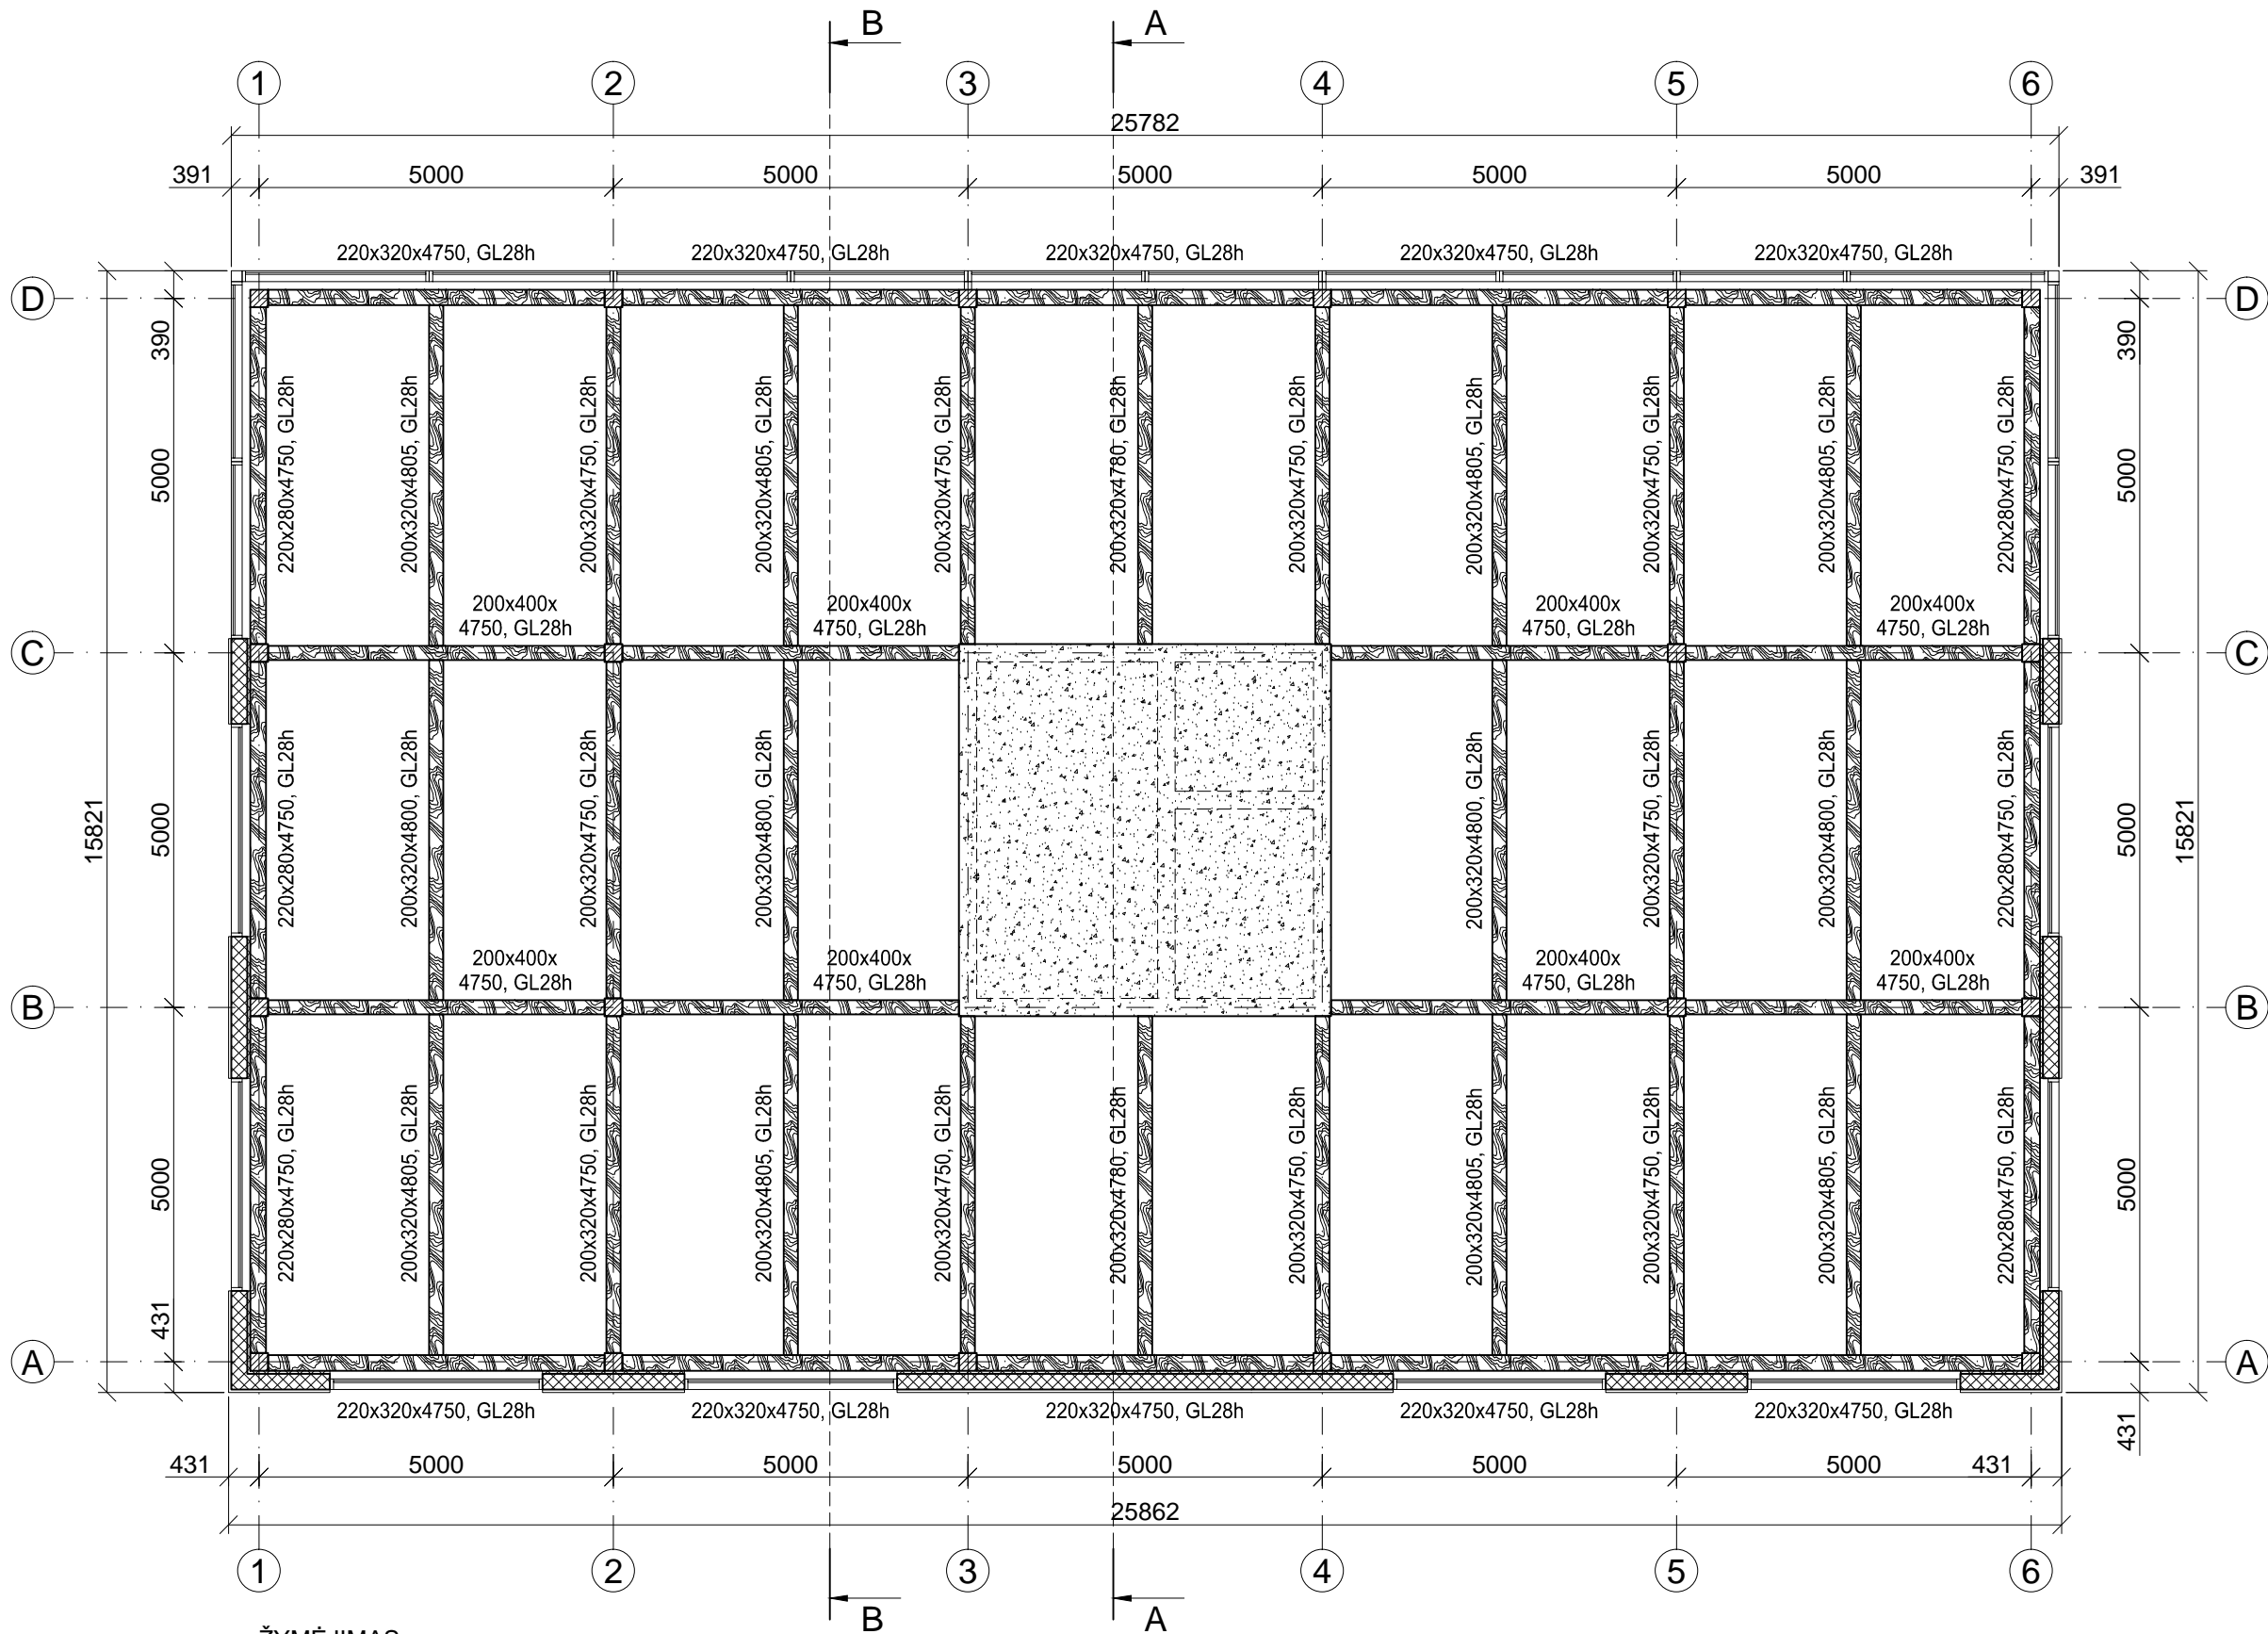

ŽYMĖJIMAS:  
200x320x4805, GL28h  
200 - sijos plotis, mm;  
320 - sijos aukštis, mm;  
4805 - sijos ilgis, mm;  
GL28h - klijuotosios medienos stiprumo klasė.

MEDINIŲ DENGINIO SIJŲ SĄNAUDŲ KIEKIŲ ŽINIARAŠTIS

| Eil. Nr.                         | Pozicija | Pavadinimas                  | Žymuo | Mato vnt. | Kiekis | Sąnaudos |         | Svoris vnt., t | Papildomi duomenys |
|----------------------------------|----------|------------------------------|-------|-----------|--------|----------|---------|----------------|--------------------|
|                                  |          |                              |       |           |        | Vien.    | Iš viso |                |                    |
| 1                                |          | Sija 220x320x4750, GL28h     |       |           |        |          |         |                |                    |
| 2                                |          | Klijuota mediena GL28h       |       | m³        | 10     | 0.334    | 3.340   |                |                    |
| 3                                |          | Įdėtinų detalių plienas S355 |       | kg        | 10     | 20.00    | 200.00  |                |                    |
| 4                                |          | Sija 220x280x4750, GL28h     |       |           |        |          |         |                |                    |
| 5                                |          | Klijuota mediena GL28h       |       | m³        | 6      | 0.293    | 1.758   |                |                    |
| 6                                |          | Įdėtinų detalių plienas S355 |       | kg        | 6      | 10.00    | 60.00   |                |                    |
| 7                                |          | Sija 200x400x4750, GL28h     |       |           |        |          |         |                |                    |
| 8                                |          | Klijuota mediena GL28h       |       | m³        | 8      | 0.380    | 3.040   |                |                    |
| 9                                |          | Įdėtinų detalių plienas S355 |       | kg        | 8      | 30.00    | 240.00  |                |                    |
| 10                               |          | Sija 200x320x4750, GL28h     |       |           |        |          |         |                |                    |
| 11                               |          | Klijuota mediena GL28h       |       | m³        | 10     | 0.304    | 3.040   |                |                    |
| 12                               |          | Sija 200x320x4780, GL28h     |       |           |        |          |         |                |                    |
| 13                               |          | Klijuota mediena GL28h       |       | m³        | 6      | 0.306    | 1.836   |                |                    |
| 14                               |          | Sija 200x320x4805, GL28h     |       |           |        |          |         |                |                    |
| 15                               |          | Klijuota mediena GL28h       |       | m³        | 8      | 0.308    | 2.464   |                |                    |
| Viso klijuotos medienos, m³:     |          |                              |       |           |        |          | 15.478  |                |                    |
| Viso įdėtinų detalių plieno, kg: |          |                              |       |           |        |          | 500.0   |                |                    |

PASTABOS:

- Surenkamų medinių sijų montavimui ant kolonų naudojamos paslėptos plieninės jungtys ir į sijas bei kolonas įleidžiami varžtai.
- Surenkamų medinių sijų įdėtinės detalės projektuojamos darbo projekto studijoje.
- Medinėms sijoms naudojama GL28h stiprumo klasės klijuotoji sluoksninė mediena.
- Medinių sijų atsparumas ugniai R60 min užtikrinamas skaičiavimais, papildomu apsauginiu medienos sluoksniu.
- Monolitinėms laiptinių ir lifto šachtų standumo sienoms naudojamas C30/37 X0 klasės betonas, pagal LST EN 206-1:2002.
- Monolitiniai elementai armuojami S500 stiprumo klasės armatūros tinklais ir/ar strypynais, pagal LST EN ISO 15630-1:2010.
- Metalinėms konstrukcijoms ir elementams naudojamas S355 stiprumo klasės plienas.
- Suvirinimo jungčių briaunų paruošimas turi būti atliekamas pagal EN ISO 9692-1.
- Metaliniai elementai tarpusavyje suvirinami, siūlės aukštis 1,2-kt - plonesniojo iš jungiamųjų elementų storis (jei nenurodyta kitaip), pagal LST EN ISO 9692-1:2004.
- Konstrukcijų suvirinimui naudojamos suvirinimo medžiagos užtikrinančios suvirinimo siūlės skaičiuojamuosius stiprius ne mažesnius nei suvirinamo metalo.
- Metaliniai paviršiai gruntuojami ir dažomi, pagal LST EN ISO 12944-2:2000.
- Skylės varžtams daromos 2 mm didesnės nei varžto diameteras (jei brėžinyje nenurodyta kitaip).
- Darbai vykdomi pagal darbo projektą.

|                            |                                                                                                                   |                                                                                                                                       |         |                                                                                      |   |       |
|----------------------------|-------------------------------------------------------------------------------------------------------------------|---------------------------------------------------------------------------------------------------------------------------------------|---------|--------------------------------------------------------------------------------------|---|-------|
| KVAL.<br>PATV.<br>DOK. NR. |                                                                                                                   | UAB "Konstrukcijų pasaulis"                                                                                                           |         | STATINIO PROJEKTO PAVADINIMAS                                                        |   |       |
|                            |                                                                                                                   | Jonavos g. 260, Kaunas<br>Įm. k.: 304690224<br>Tel. +370 (613) 98089<br>El.p.: k.pazereckas@gmail.com<br>www.konstrukciju-pasaulis.lt |         | Negyvenamasis 2 aukštų klijuotosios medienos konstrukcijų mokslo paskirties pastatas |   |       |
| 37603                      | PDV                                                                                                               | Kęstutis Pažereckas                                                                                                                   | 2018 08 | DOKUMENTO PAVADINIMAS                                                                |   | LAIDA |
| 37603                      | Konstr.                                                                                                           | Kęstutis Pažereckas                                                                                                                   | 2018 08 | Denginio sijų planas                                                                 |   | O     |
|                            |                                                                                                                   |                                                                                                                                       |         |                                                                                      |   |       |
| LT                         | UŽSAKOVAS                                                                                                         |                                                                                                                                       |         | BRĖŽINIO ŽYMUO                                                                       |   | LAPAS |
|                            | Miškų institutas, Lietuvos agrarinių ir miškų mokslų centro filialas, Liepų g. 1, Girionių k., LT-53101, Kauno r. |                                                                                                                                       |         | KPRS18/02-TP-SK-2.12                                                                 |   | LAPŲ  |
|                            |                                                                                                                   |                                                                                                                                       |         |                                                                                      |   | 1     |
|                            |                                                                                                                   |                                                                                                                                       |         |                                                                                      | 1 |       |

DENGINIO ILGINIŲ (PASKIRSTOMŲJŲ SIJŲ) PLANAS MASTELIS 1:100

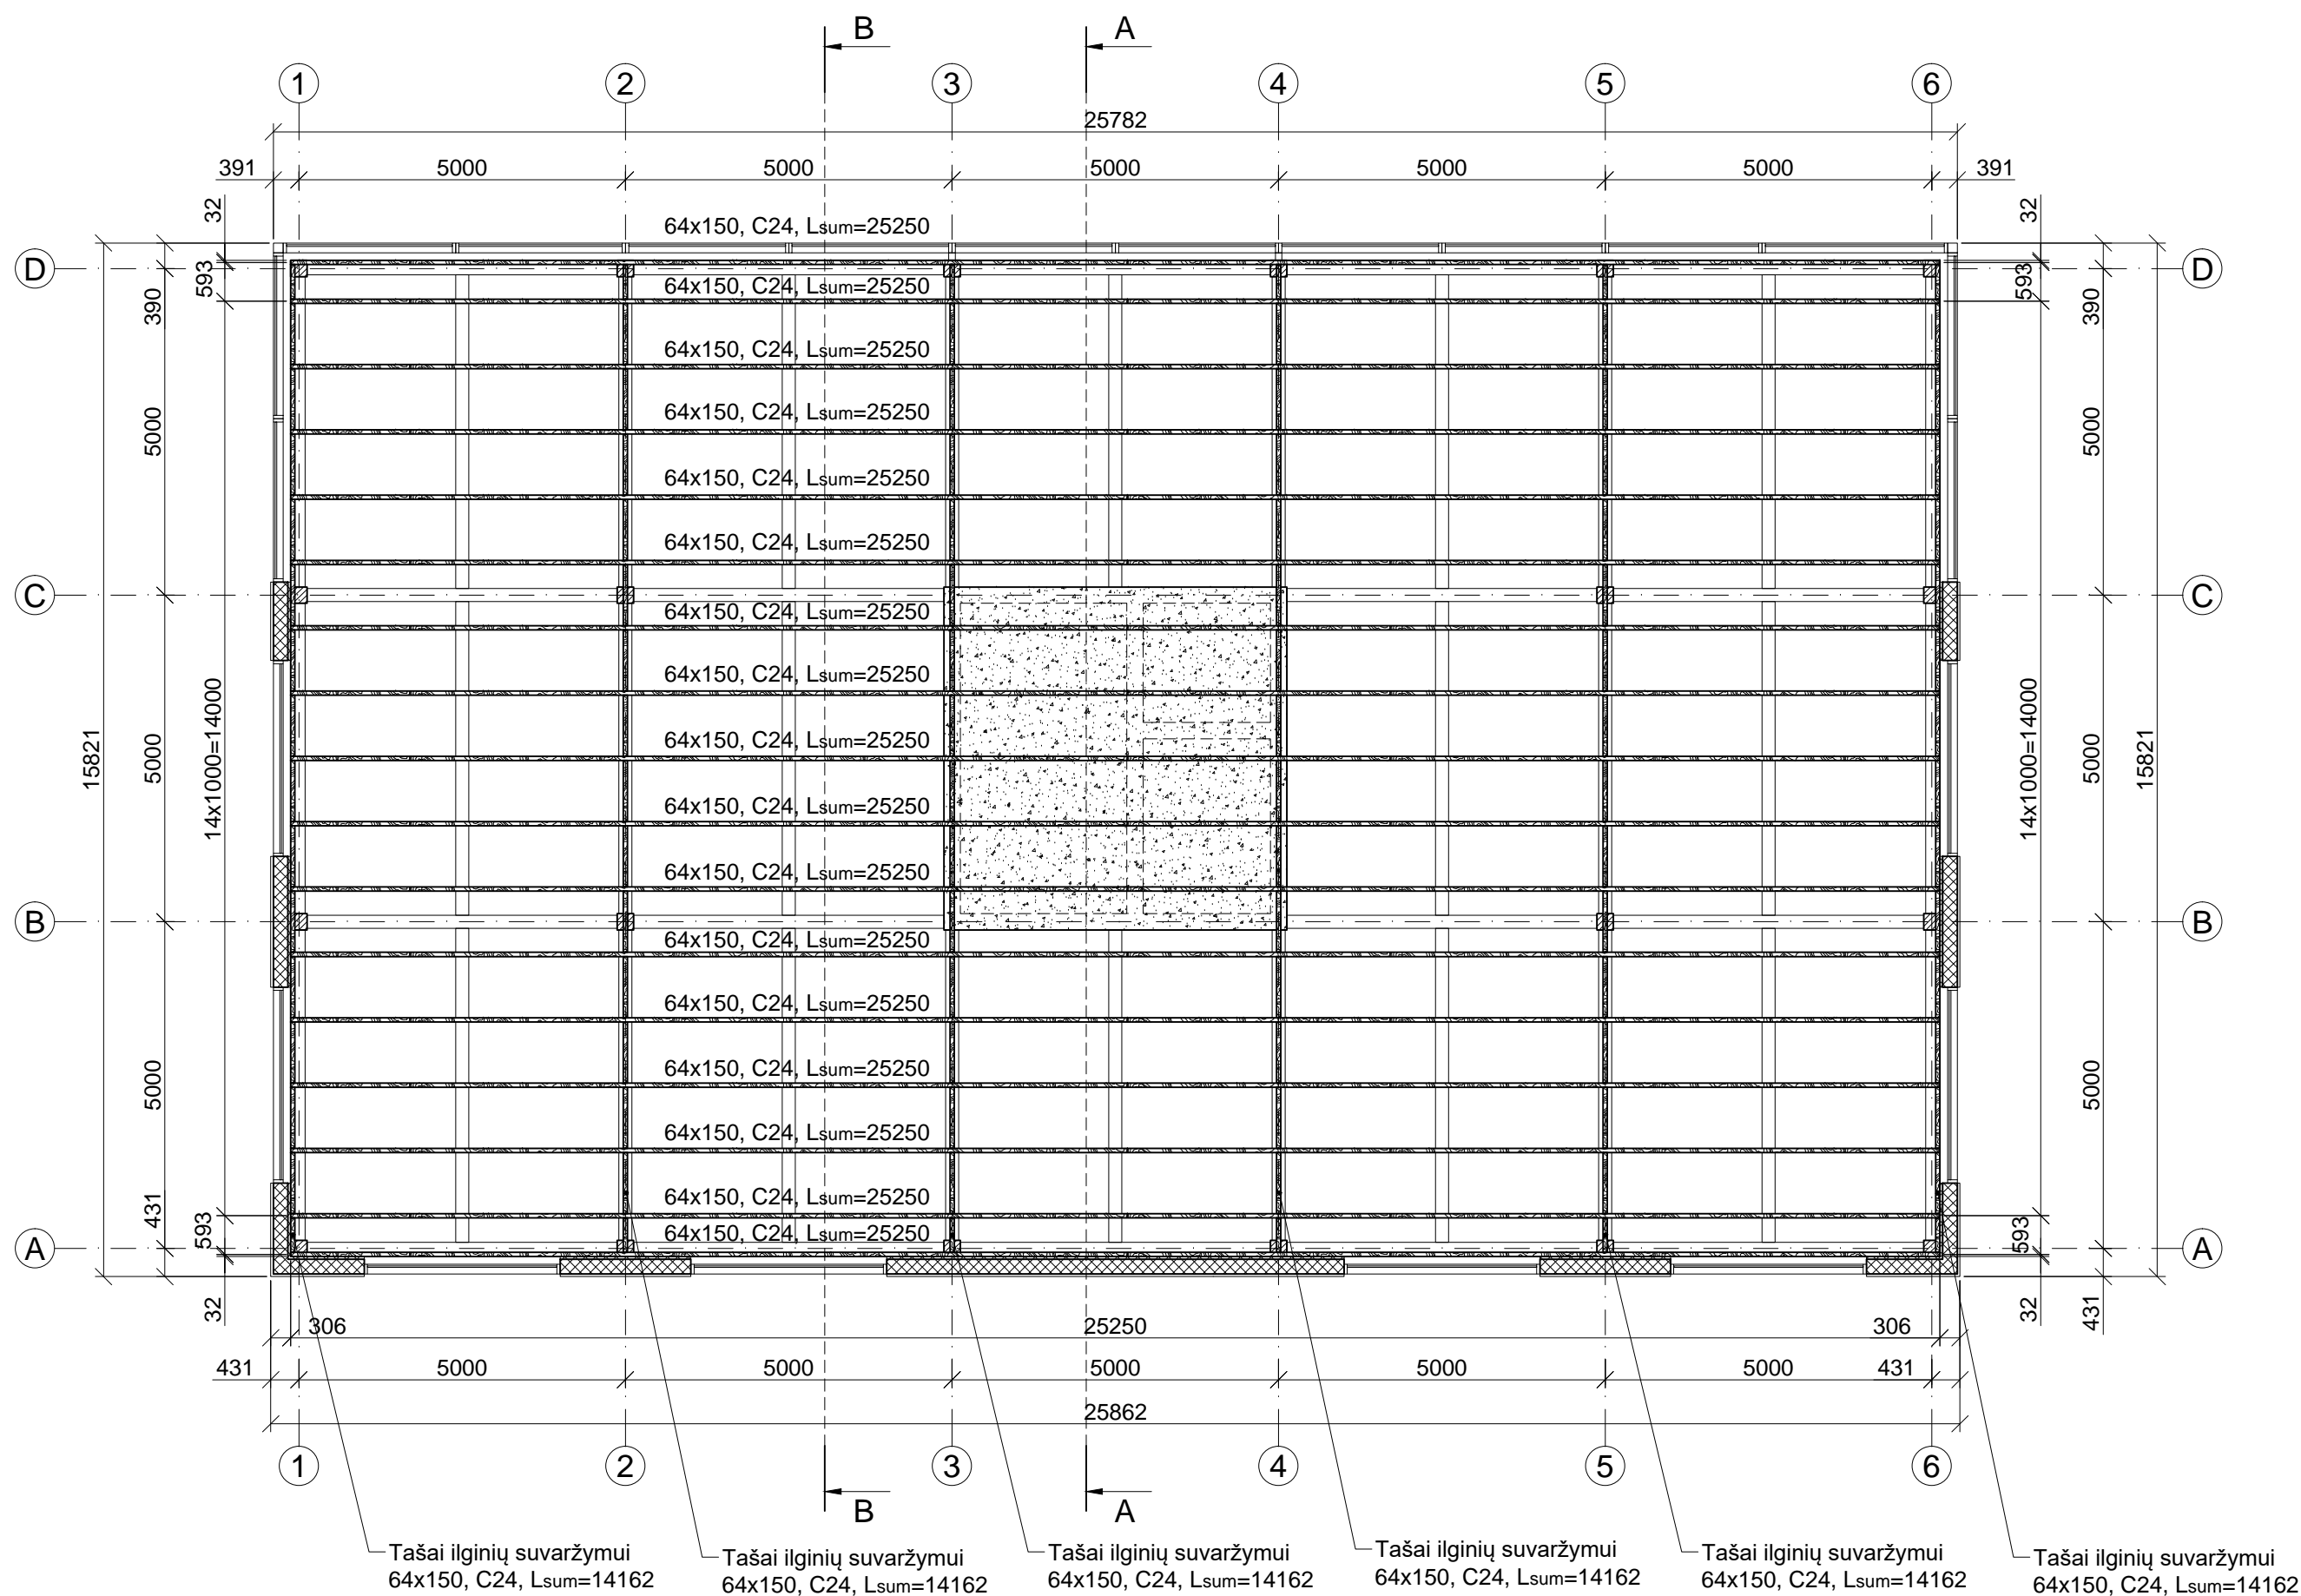

DENGINIO ILGINIŲ IR PAKLOTO SĄNAUDŲ KIEKIŲ ŽINIARAŠTIS

| Eil. Nr.                     | Pozicija | Pavadinimas              | Žymuo | Mato vnt. | Kiekis | Sąnaudos |         | Svoris vnt., t | Papildomi duomenys |
|------------------------------|----------|--------------------------|-------|-----------|--------|----------|---------|----------------|--------------------|
|                              |          |                          |       |           |        | Vien.    | Iš viso |                |                    |
| 1                            |          | Ilginis 64x150x25250     |       | m³        | 17     | 0.267    | 4.539   |                |                    |
| 2                            |          | Pjautinė mediena C24     |       | m³        | -      | -        | 0.820   |                |                    |
| 3                            |          | Pagalbiniai tašai 64x150 |       | m³        | -      | -        | -       |                |                    |
| 4                            |          | Pjautinė mediena C24     |       | m³        | -      | -        | -       |                |                    |
| 5                            |          | Lentų paklotas           |       | m³        | -      | -        | -       |                |                    |
| 6                            |          | Pjautinė mediena C24     |       | m³        | -      | -        | 9.628   |                |                    |
| Viso pjautinės medienos, m³: |          |                          |       |           |        |          | 14.987  |                |                    |

PASTABOS:

- Medinių paskirstomųjų ilginių ir pagalbinių tašų gamybai naudojama C24 stiprumo klasės vientisoji spygliuočių mediena.
- Ilginių montavimui ant sijų naudojamos standartizuotos plieninės detalės ir sraigtinės viny, bei medisraigčiai.
- Monolitinėms laiptinių ir lifto šachtų standumo sienoms naudojamas C30/37 X0 klasės betonas, pagal LST EN 206-1:2002.
- Monolitiniai elementai armuojami S500 stiprumo klasės armatūros tinklais ir/ar strypynais, pagal LST EN ISO 15630-1:2010.
- Metalinėms konstrukcijoms ir elementams naudojamas S355 stiprumo klasės plienas.
- Suvirinimo jungčių briaunų paruošimas turi būti atliekamas pagal EN ISO 9692-1.
- Metaliniai elementai tarpusavyje suvirinami, siūlės aukštis 1,2-kf - plonesniojo iš jungiamųjų elementų storis (jei nenurodyta kitaip), pagal LST EN ISO 9692-1:2004.
- Konstrukcijų suvirinimui naudojamos suvirinimo medžiagos užtikrinančios suvirinimo siūlės skaičiuojamuosius stiprius ne mažesnius nei suvirinamo metalo.
- Metaliniai paviršiai gruntuojami ir dažomi, pagal LST EN ISO 12944-2:2000.
- Skylės varžtams daromos 2 mm didesnės nei varžto diametras (jei brėžinyje nenurodyta kitaip).
- Darbai vykdomi pagal darbo projektą.

|                            |                                                                                                                                |                                                                                                                                                                      |         |                                                                                                                       |  |  |       |      |
|----------------------------|--------------------------------------------------------------------------------------------------------------------------------|----------------------------------------------------------------------------------------------------------------------------------------------------------------------|---------|-----------------------------------------------------------------------------------------------------------------------|--|--|-------|------|
| KVAL.<br>PATV.<br>DOK. NR. |                                           | UAB "Konstrukcijų pasaulis"<br>Jonavos g. 260, Kaunas<br>Įm. k.: 304690224<br>Tel. +370 (613) 98089<br>El.p.: k.pazereckas@gmail.com<br>www.konstrukciju-pasaulis.lt |         | STATINIO PROJEKTO PAVADINIMAS<br>Negyvenamasis 2 aukštų klijuotosios medienos konstrukcijų mokslo paskirties pastatas |  |  |       |      |
| 37603                      | PDV                                                                                                                            | Kęstutis Pažereckas                                                                                                                                                  | 2018 08 | DOKUMENTO PAVADINIMAS<br>Denginio ilginių (paskirstomųjų sijų) planas                                                 |  |  | LAIDA |      |
| 37603                      | Konstr.                                                                                                                        | Kęstutis Pažereckas                                                                                                                                                  | 2018 08 |                                                                                                                       |  |  | O     |      |
|                            |                                                                                                                                |                                                                                                                                                                      |         |                                                                                                                       |  |  |       |      |
| LT                         | UŽSAKOVAS<br>Miškų institutas, Lietuvos agrarinių ir miškų mokslų centro filialas, Liepų g. 1, Girionių k., LT-53101, Kauno r. |                                                                                                                                                                      |         | BRĖŽINIO ŽYMUO<br>KPRS18/02-TP-SK-2.13                                                                                |  |  | LAPAS | LAPŲ |
|                            |                                                                                                                                |                                                                                                                                                                      |         |                                                                                                                       |  |  | 1     | 1    |
|                            |                                                                                                                                |                                                                                                                                                                      |         |                                                                                                                       |  |  |       |      |



**PJŪVIS A-A MASTELIS 1:50**

The drawing illustrates a symmetrical architectural cross-section of a building facade, titled "PJŪVIS A-A MASTELIS 1:50". It depicts two main volumes flanking a central staircase area. The left volume contains a lift shaft ("G/B lifto/laiptinės šachta") and a standard wall ("Lifto šachtos/laiptinės standumo sienos"). The right volume mirrors this layout. The central section features a staircase ("G/B laiptai") with dimensions indicating a total width of 9x250=2250. Various structural elements are labeled, including beams (VR-1.1, VR-2.1) and columns (K-1.2, K-2.2). Material specifications for concrete (C20/25) and reinforcement (GL28h) are noted. Elevation levels are marked on both sides, ranging from +7.320 down to -0.290. Horizontal dimensions show a total width of 15000, divided into three 5000-unit segments. Foundation details at the bottom include ROS-2, PG-2, GP-6, GP-4, and GP-2.

| KVAL.<br>PATV.<br>DOK. NR. |                                                                                                                                | <b>UAB "Konstrukcijų pasaulis"</b><br>Jonavos g. 260, Kaunas<br>Įm. k.: 304690224<br>Tel. +370 (613) 98089<br>El.p.: k.pazereckas@gmail.com<br>www.konstrukciju-pasaulis.lt |         | STATINIO PROJEKTO PAVADINIMAS<br>Negyvenamasis 2 aukštų klijuotosios medienos konstrukcijų mokslo paskirties pastatas |  |            |           |
|----------------------------|--------------------------------------------------------------------------------------------------------------------------------|-----------------------------------------------------------------------------------------------------------------------------------------------------------------------------|---------|-----------------------------------------------------------------------------------------------------------------------|--|------------|-----------|
| 37603                      | PDV                                                                                                                            | Kęstutis Pažereckas                                                                                                                                                         | 2018 08 | DOKUMENTO PAVADINIMAS<br>Pjūvis A-A                                                                                   |  | LAI DA     |           |
| 37603                      | Konstr.                                                                                                                        | Kęstutis Pažereckas                                                                                                                                                         | 2018 08 |                                                                                                                       |  | O          |           |
| LT                         | UŽSAKOVAS<br>Miškų institutas, Lietuvos agrarinių ir miškų mokslų centro filialas, Liepų g. 1, Girionių k., LT-53101, Kauno r. |                                                                                                                                                                             |         | BRĖŽINIO ŽYMUO<br>KPRS18/02-TP-SK-2.14                                                                                |  | LAPAS<br>1 | LAPŲ<br>1 |

|                            |                                                                                                                                    |                                                                                                                                                                             |                     |                                                                                                                       |                                     |  |       |       |
|----------------------------|------------------------------------------------------------------------------------------------------------------------------------|-----------------------------------------------------------------------------------------------------------------------------------------------------------------------------|---------------------|-----------------------------------------------------------------------------------------------------------------------|-------------------------------------|--|-------|-------|
| KVAL.<br>PATV.<br>DOK. NR. |                                               | <b>UAB "Konstrukcijų pasaulis"</b><br>Jonavos g. 260, Kaunas<br>Įm. k.: 304690224<br>Tel. +370 (613) 98089<br>El.p.: k.pazereckas@gmail.com<br>www.konstrukciju-pasaulis.lt |                     | STATINIO PROJEKTO PAVADINIMAS<br>Negyvenamasis 2 aukštų klijuotosios medienos konstrukcijų mokslo paskirties pastatas |                                     |  |       |       |
|                            | 37603                                                                                                                              | PDV                                                                                                                                                                         | Kęstutis Pažereckas | 2018 08                                                                                                               | DOKUMENTO PAVADINIMAS<br>Pjūvis A-A |  |       | LAIDA |
|                            | 37603                                                                                                                              | Konstr.                                                                                                                                                                     | Kęstutis Pažereckas | 2018 08                                                                                                               |                                     |  |       | O     |
|                            |                                                                                                                                    |                                                                                                                                                                             |                     |                                                                                                                       |                                     |  |       |       |
| LT                         | UŽSAKOVAS<br><br>Miškų institutas, Lietuvos agrarinių ir miškų mokslų centro filialas, Liepų g. 1, Girionių k., LT-53101, Kauno r. |                                                                                                                                                                             |                     | BRĖŽINIO ŽYMUO<br><br>KPRS18/02-TP-SK-2.14                                                                            |                                     |  | LAPAS | LAPŲ  |
|                            |                                                                                                                                    |                                                                                                                                                                             |                     |                                                                                                                       |                                     |  | 1     | 1     |

PJŪVIS B-B MASTELIS 1:50

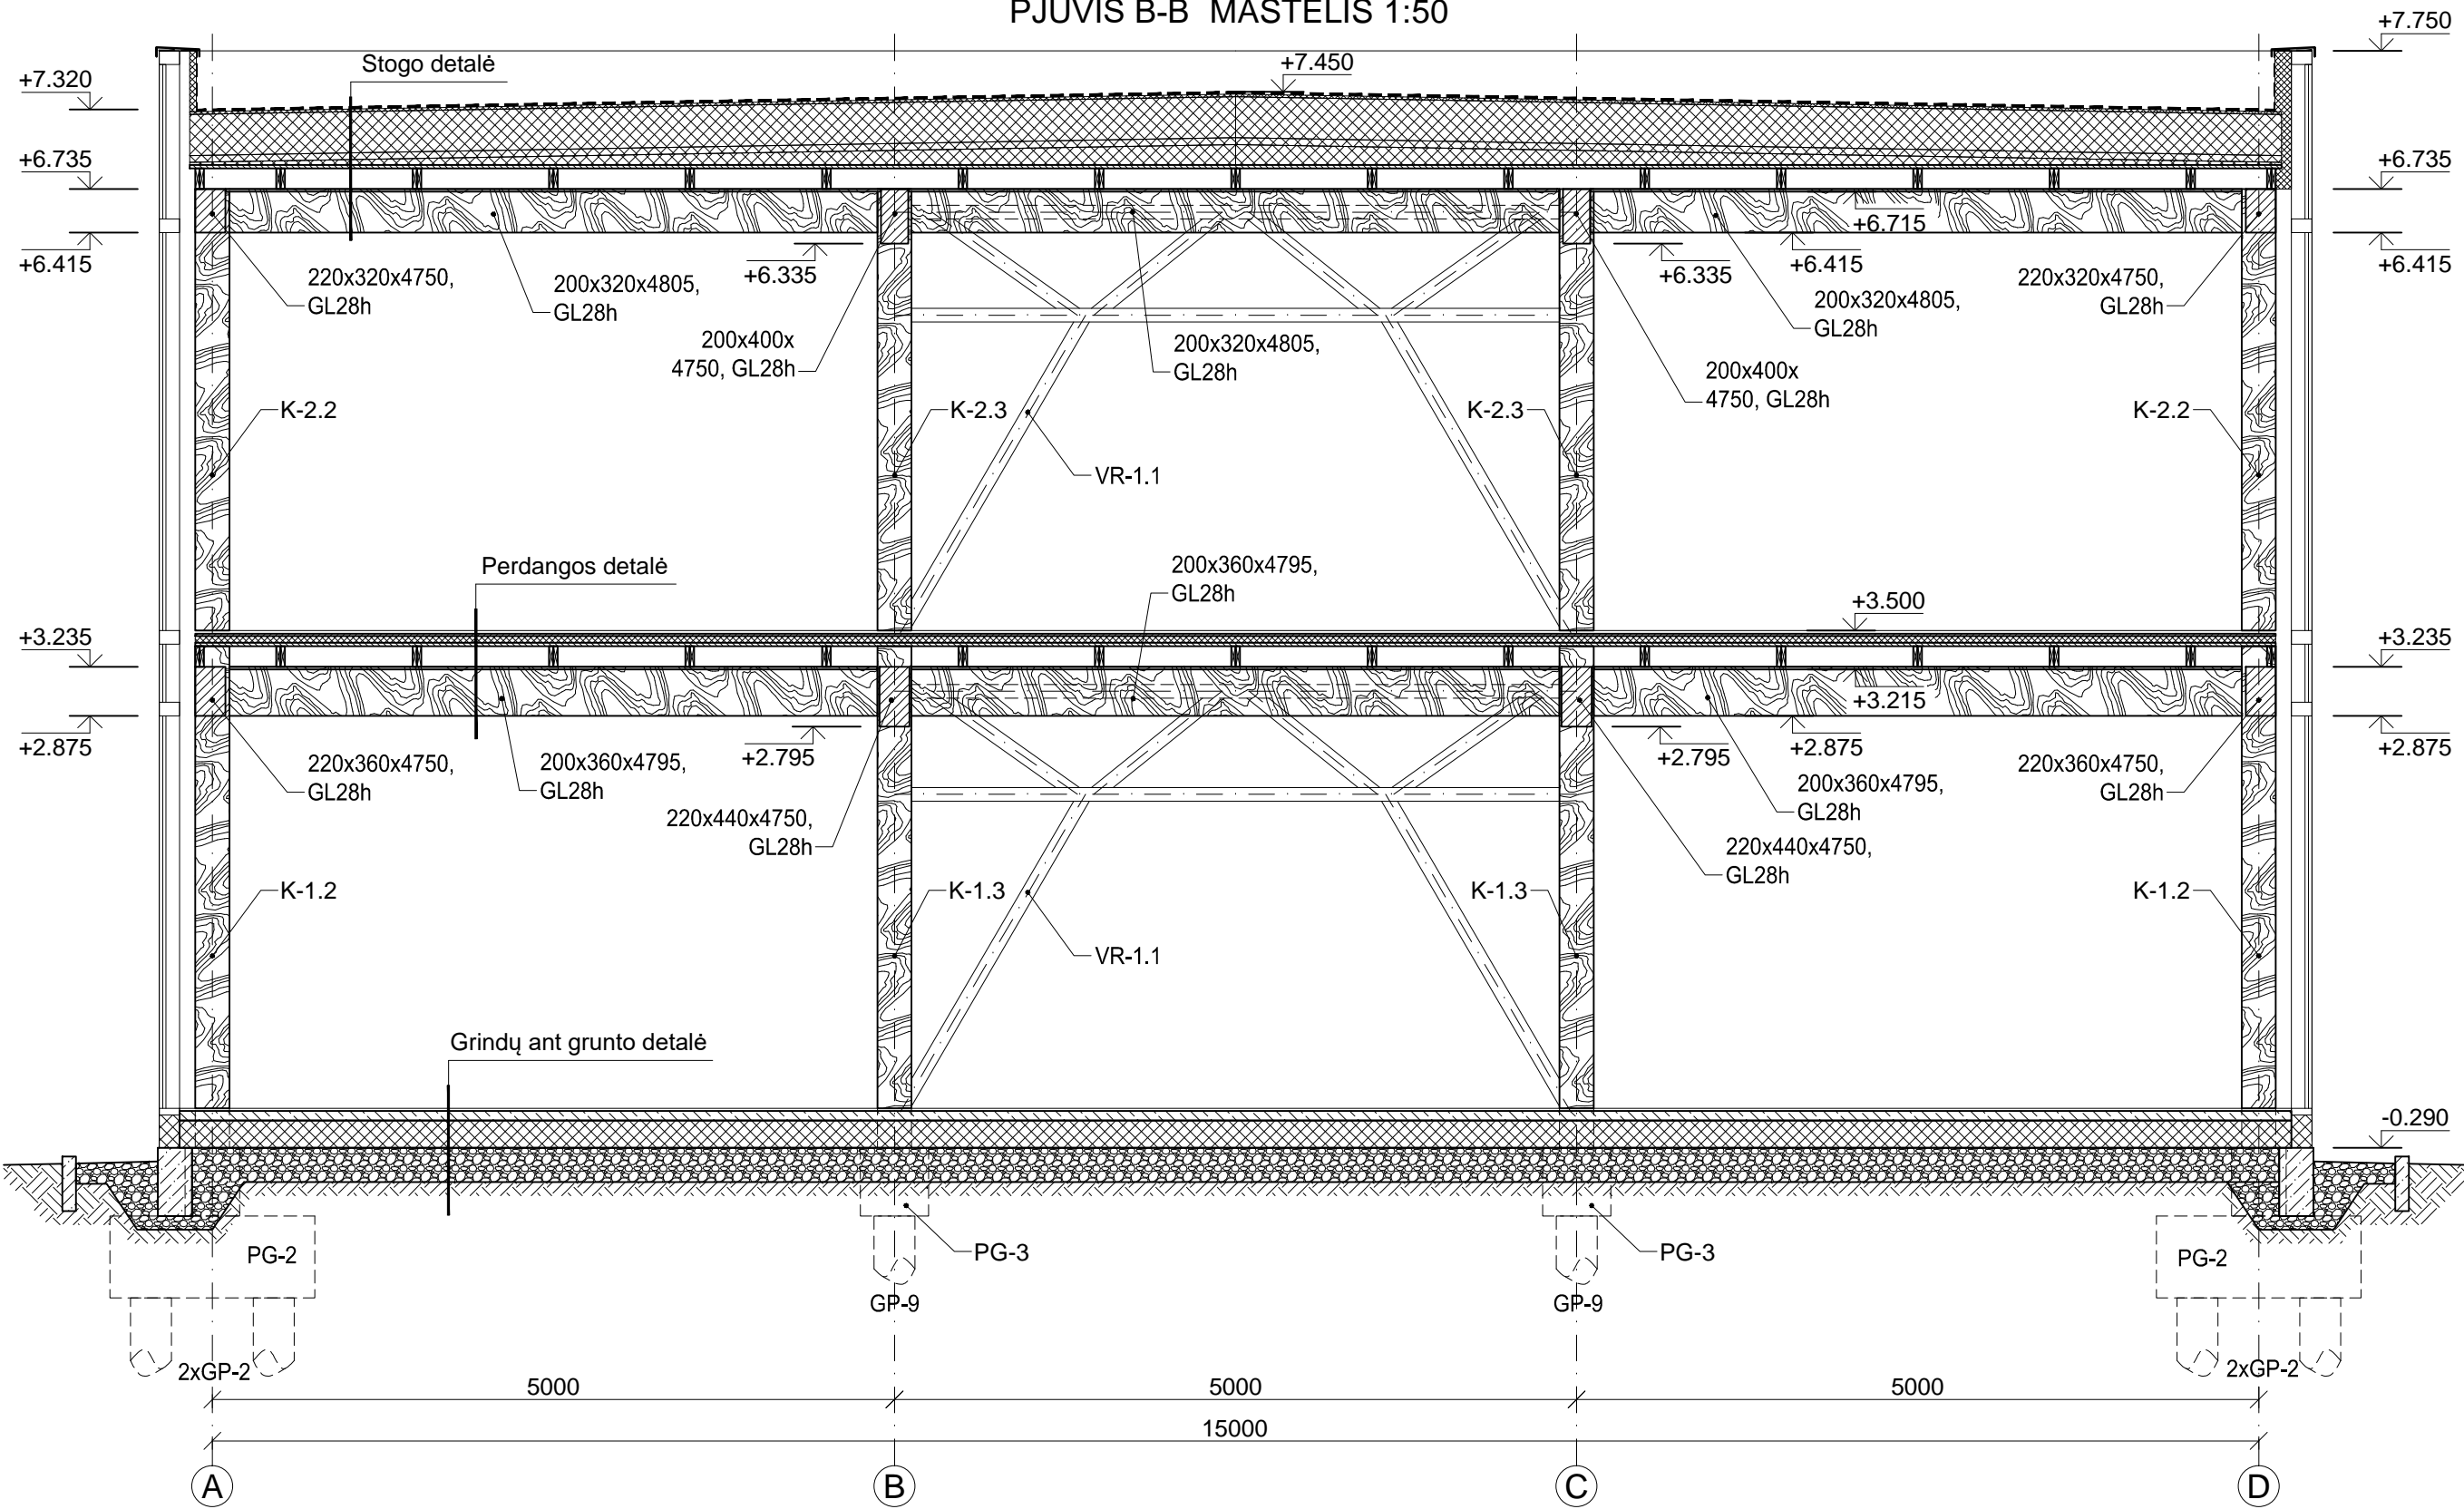

|                            |                                                                                                                   |                                                                                                                                       |         |                                                                                      |  |       |
|----------------------------|-------------------------------------------------------------------------------------------------------------------|---------------------------------------------------------------------------------------------------------------------------------------|---------|--------------------------------------------------------------------------------------|--|-------|
| KVAL.<br>PATV.<br>DOK. NR. |                              | UAB "Konstrukcijų pasaulis"                                                                                                           |         | STATINIO PROJEKTO PAVADINIMAS                                                        |  |       |
|                            |                                                                                                                   | Jonavos g. 260, Kaunas<br>Įm. k.: 304690224<br>Tel. +370 (613) 98089<br>El.p.: k.pazereckas@gmail.com<br>www.konstrukciju-pasaulis.lt |         | Negyvenamasis 2 aukštų klijuotosios medienos konstrukcijų mokslo paskirties pastatas |  |       |
|                            |                                                                                                                   |                                                                                                                                       |         |                                                                                      |  |       |
| 37603                      | PDV                                                                                                               | Kęstutis Pažereckas                                                                                                                   | 2018 08 | DOKUMENTO PAVADINIMAS<br>Pjūvis B-B                                                  |  | LAIDA |
| 37603                      | Konstr.                                                                                                           | Kęstutis Pažereckas                                                                                                                   | 2018 08 |                                                                                      |  | O     |
|                            |                                                                                                                   |                                                                                                                                       |         |                                                                                      |  |       |
| LT                         | UŽSAKOVAS                                                                                                         |                                                                                                                                       |         | BRĖŽINIO ŽYMUO<br><br>KPRS18/02-TP-SK-2.15                                           |  | LAPAS |
|                            | Miškų institutas, Lietuvos agrarinių ir miškų mokslų centro filialas, Liepų g. 1, Girionių k., LT-53101, Kauno r. |                                                                                                                                       |         |                                                                                      |  | 1     |
|                            |                                                                                                                   |                                                                                                                                       |         |                                                                                      |  | 1     |

|                                                         |
|---------------------------------------------------------|
| Bituminė / EPDM stogo danga                             |
| Nuolydį formuojantis akm. vatos sluoksnis - 20...150 mm |
| Akmens vatos šiltinamasis sluoksnis - 300 mm            |
| Garų izoliacinė pėvelė - 1 sl.                          |
| Lentų paklotas - 25 mm                                  |
| Stogo incliniai 2x(32x150), kas 1000 mm - 150 mm        |
| Medinės dailylentės - 20 mm                             |
| Laikanti konstrukcija (medinės sijos)                   |

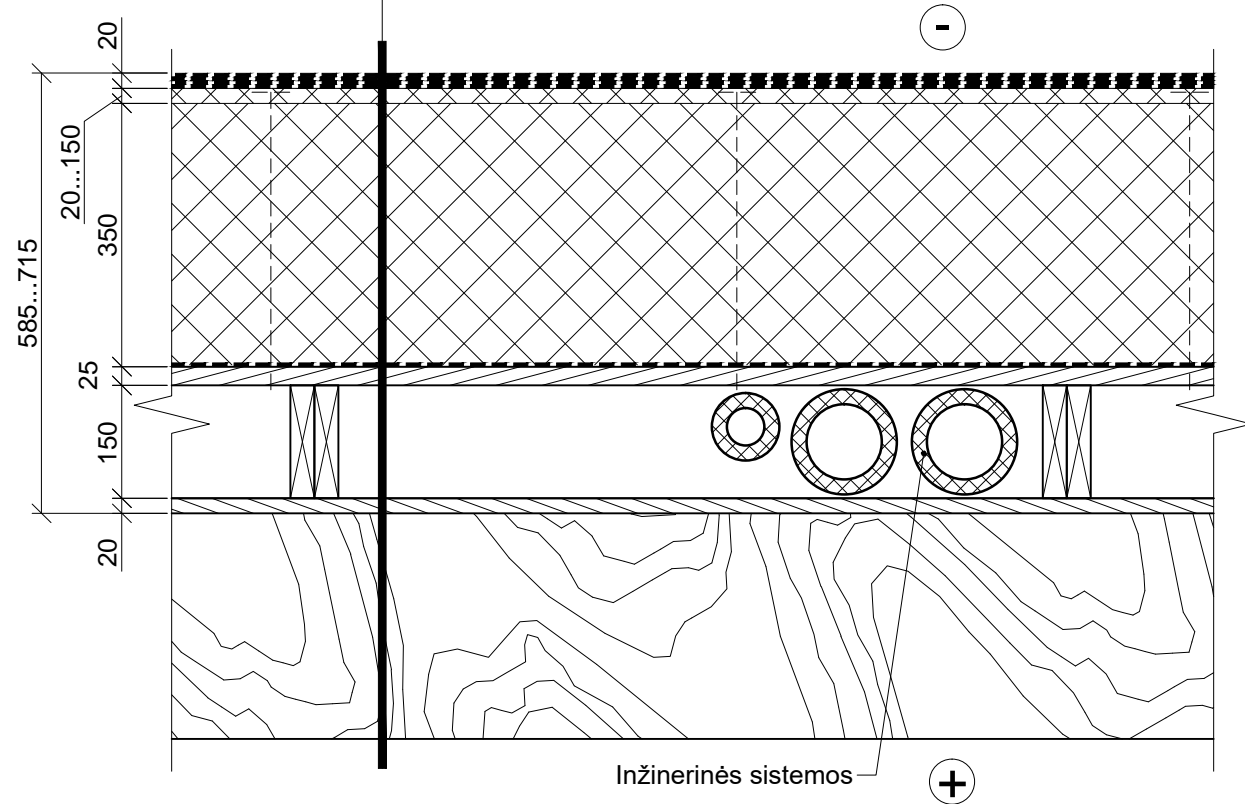

|                                                       |
|-------------------------------------------------------|
| Grindų danga 20 mm                                    |
| 2 sl. tepinėlis hidroizoliacijos (drėgnoms patalpoms) |
| Armuo tas išlyginamasis sluoksnis - 70 mm             |
| Polietileno plėvelė - 200 μm                          |
| Polistireninis putplastis EPS 100 - 200 mm            |
| Hidroizoliacija - 1 sl.                               |
| Sutankintas skaldos sluoksnis (fr.0/32) - 250 mm      |
| Sutankintas vietinis gruntas                          |

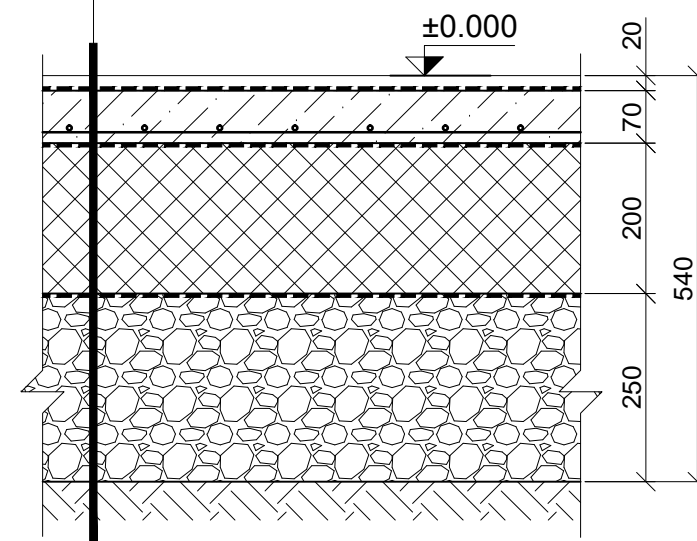

|                                                 |
|-------------------------------------------------|
| Parketas/guminė grindų danga - 12mm             |
| Kamštinė medžiaga parketui (parketui) - 8 mm    |
| Hidroizoliacija (drėgnoms patalpoms) - 4 mm     |
| OSB 3 plokštė - 16 mm                           |
| Priešsmūginė akmens vatos plokštė - 50 mm       |
| Lentų paklotas - 25 mm                          |
| Stogo ilginiai 2x(32x150), kas 1000 mm - 150 mm |
| Medinės lubų dailylentės - 20 mm                |
| Laikanti konstrukcija (medinės sijos)           |

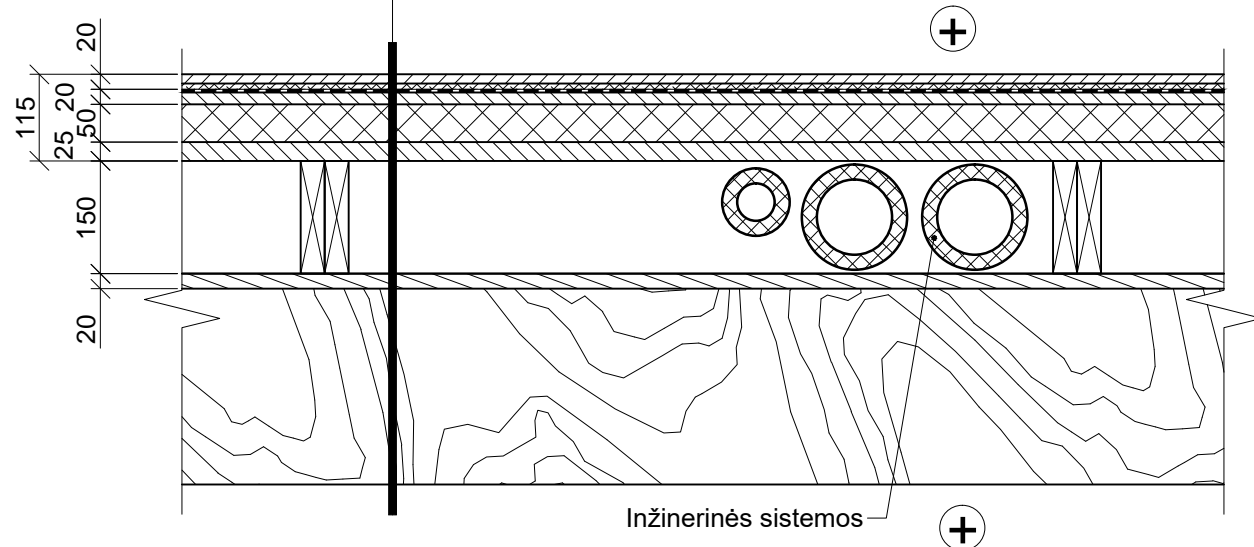

|                                                                                                 |
|-------------------------------------------------------------------------------------------------|
| Vidaus apdaila (gipso/kartono plokštė) - 12,5 mm                                                |
| Kingspan Therma TP10 ( $\lambda_d=0.023$ W/m·K) - 30 mm                                         |
| OSB 3 plokštė - 12 mm                                                                           |
| Putų poliuretanas ( $\lambda_d=0.022$ W/m·K)<br>tarp 50x200, C24 karkaso tašų, kas 600 - 200 mm |
| OSB 3 plokštė - 12 mm                                                                           |
| Difuzinė plėvelė - 1 sl.                                                                        |
| "Omega" skardiniai grebėstai fasado apdailai tvirtinti - 30 mm                                  |
| Fasado apdaila cementinės plokštės - 10 mm                                                      |

|                            |                                                                                                                   |                                                                                                                                       |         |                     |                      |                                                                                     |  |       |       |                 |
|----------------------------|-------------------------------------------------------------------------------------------------------------------|---------------------------------------------------------------------------------------------------------------------------------------|---------|---------------------|----------------------|-------------------------------------------------------------------------------------|--|-------|-------|-----------------|
| KVAL.<br>PATV.<br>DOK. NR. |                              | UAB "Konstrukcijų pasaulis"                                                                                                           |         |                     |                      | STATINIO PROJEKTO PAVADINIMAS                                                       |  |       |       |                 |
|                            |                                                                                                                   | Jonavos g. 280, Kaunas<br>Įm. k.: 304690024<br>Tel. +370 (613) 98089<br>El.p.: k.pazereckas@gmail.com<br>www.konstrukciju-pasaulis.lt |         |                     |                      | Negyvenamasis 2 aukštų klijuotojos medienos konstrukcijų mokslo paskirties pastatas |  |       |       |                 |
|                            |                                                                                                                   | 37603                                                                                                                                 | PDV     | Kęstutis Pažereckas | 2018 08              | DOKUMENTO PAVADINIMAS                                                               |  | LAIDA |       |                 |
|                            |                                                                                                                   | 37603                                                                                                                                 | Konstr. | Kęstutis Pažereckas | 2018 08              |                                                                                     |  |       |       | Aitvarų detalės |
|                            |                                                                                                                   |                                                                                                                                       |         |                     |                      | O                                                                                   |  |       |       |                 |
| LT                         | UŽSAKOVAS                                                                                                         |                                                                                                                                       |         |                     | BRĖŽINIO ŽYMUO       |                                                                                     |  |       | LAPAS | LAPŲ            |
|                            | Miškų institutas, Lietuvos agrarinių ir miškų mokslų centro filialas. Liepų g. 1, Girionių k., LT-53101, Kauno r. |                                                                                                                                       |         |                     | KPRS18/02-TP-SK-2.16 |                                                                                     |  |       | 1     | 1               |



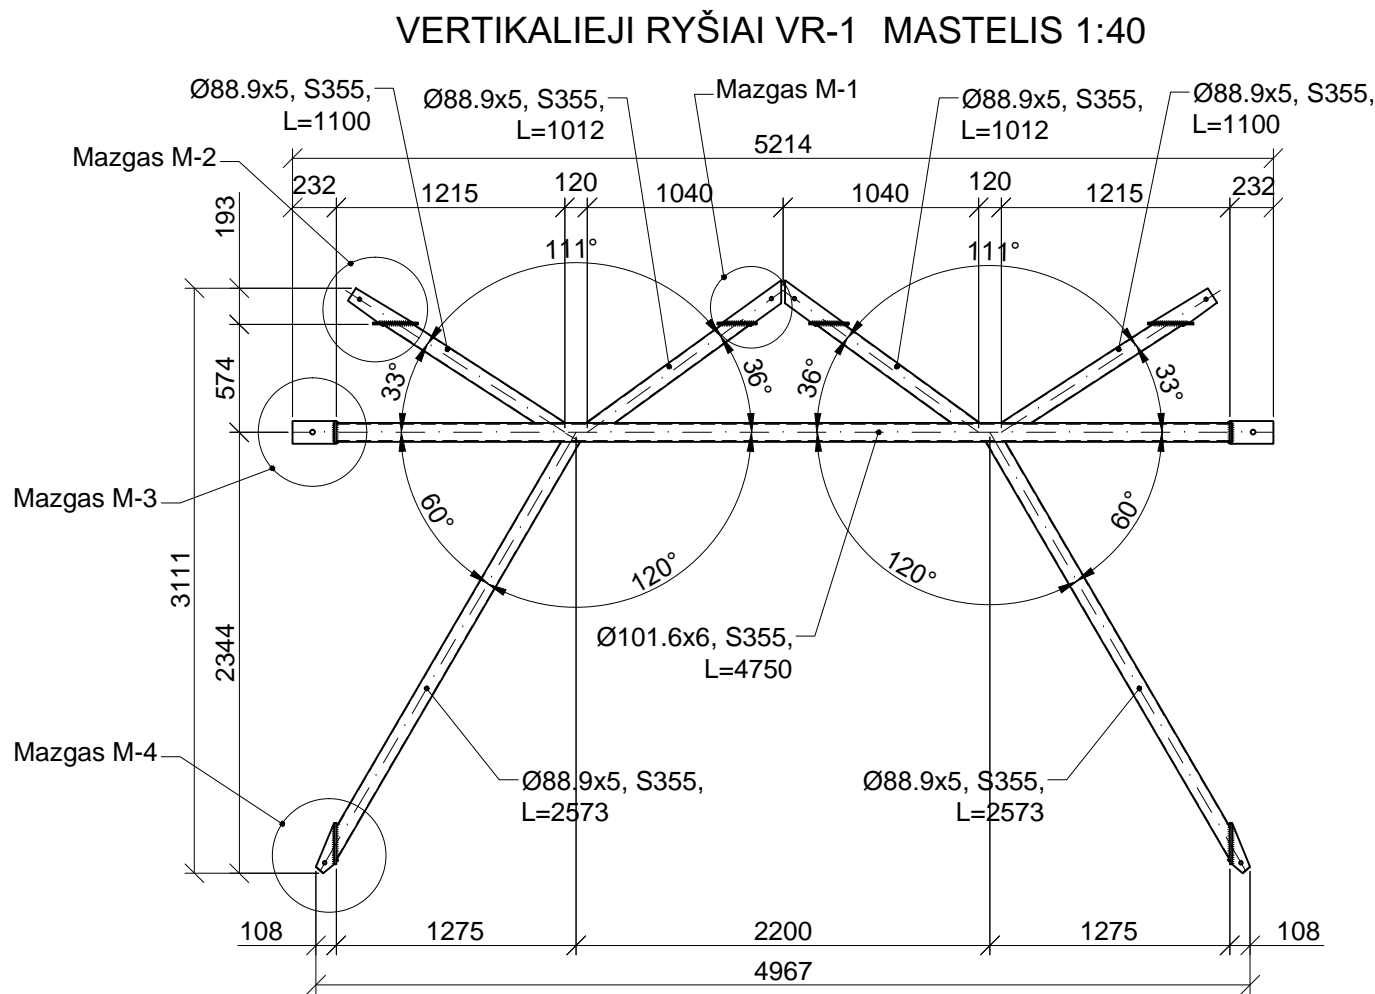

MAZGAS M-1 MASTELIS 1:10

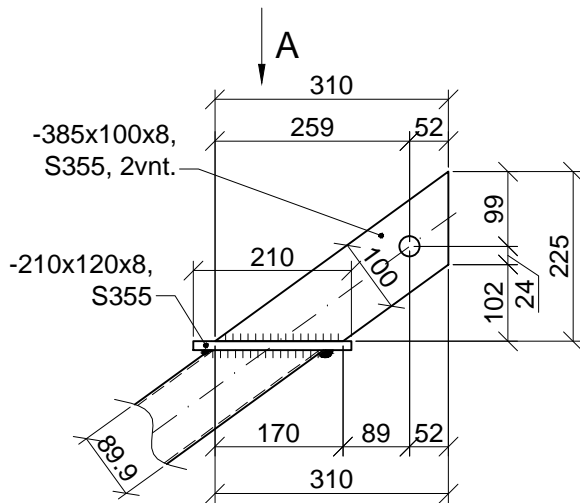

MAZGAS M-2 MASTELIS 1:10

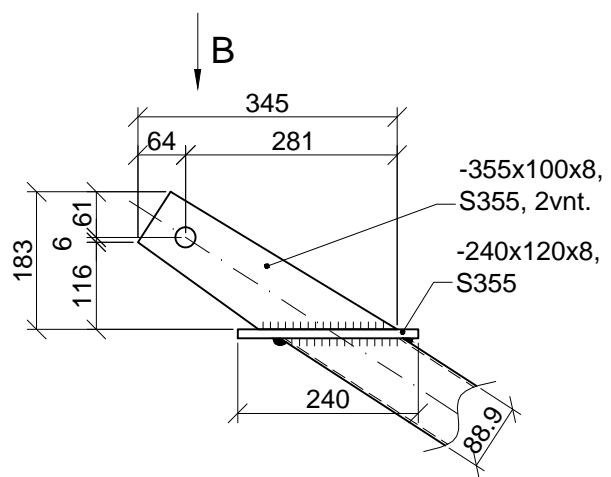

MAZGAS M-3 MASTELIS 1:10

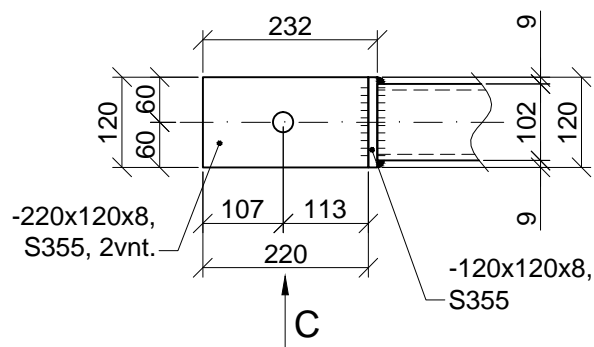

MAZGAS M-4 MASTELIS 1:10

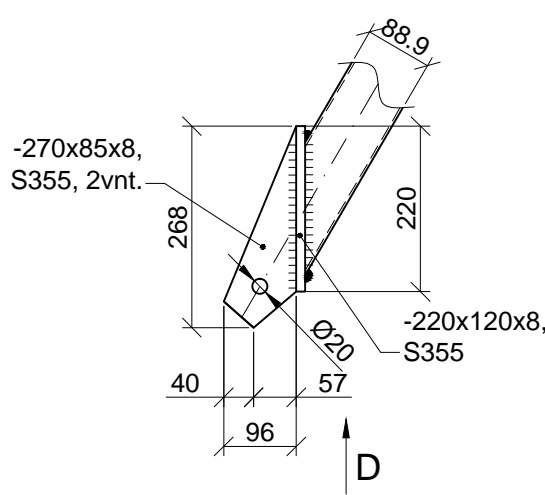

VAIZDAS A MASTELIS 1:10

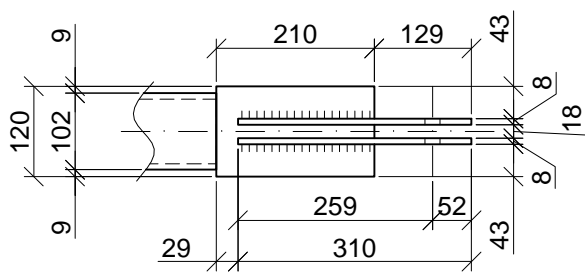

VAIZDAS B MASTELIS 1:10

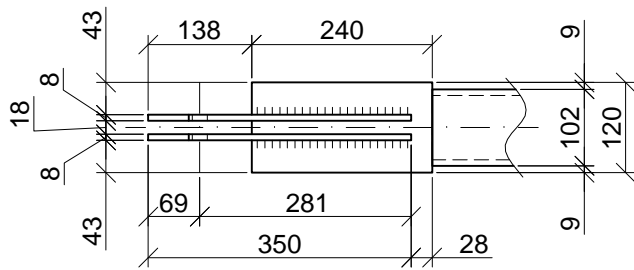

VAIZDAS C MASTELIS 1:10

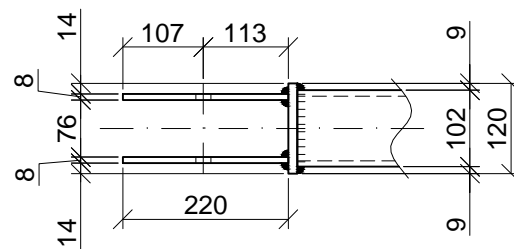

VAIZDAS C MASTELIS 1:10

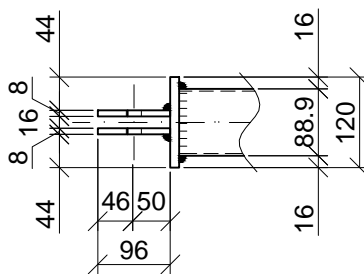

|                            |                                                                                                                   |                                                                                                                                       |         |                                                                                      |         |                          |      |
|----------------------------|-------------------------------------------------------------------------------------------------------------------|---------------------------------------------------------------------------------------------------------------------------------------|---------|--------------------------------------------------------------------------------------|---------|--------------------------|------|
| KVAL.<br>PATV.<br>DOK. NR. |                                                                                                                   | UAB "Konstrukcijų pasaulis"                                                                                                           |         | STATINIO PROJEKTO PAVADINIMAS                                                        |         |                          |      |
|                            |                                                                                                                   | Jonavos g. 260, Kaunas<br>Įm. k.: 304690224<br>Tel. +370 (613) 98089<br>El.p.: k.pazereckas@gmail.com<br>www.konstrukciju-pasaulis.lt |         | Negyvenamasis 2 aukštų klijuotosios medienos konstrukcijų mokslo paskirties pastatas |         |                          |      |
|                            |                                                                                                                   | 37603                                                                                                                                 | PDV     | Kęstutis Pažereckas                                                                  | 2018 08 | DOKUMENTO PAVADINIMAS    |      |
|                            |                                                                                                                   | 37603                                                                                                                                 | Konstr. | Kęstutis Pažereckas                                                                  | 2018 08 | Vertikalieji ryšiai VR-1 |      |
|                            |                                                                                                                   |                                                                                                                                       |         | LAIDA                                                                                |         |                          |      |
|                            |                                                                                                                   |                                                                                                                                       |         | O                                                                                    |         |                          |      |
| LT                         | UŽSAKOVAS                                                                                                         |                                                                                                                                       |         | BRĖŽINIO ŽYMUO                                                                       |         | LAPAS                    | LAPŲ |
|                            | Miškų institutas, Lietuvos agrarinių ir miškų mokslų centro filialas, Liepų g. 1, Girionių k., LT-53101, Kauno r. |                                                                                                                                       |         | KPRS18/02-TP-SK-2.17                                                                 |         | 1                        | 1    |
|                            |                                                                                                                   |                                                                                                                                       |         |                                                                                      |         |                          |      |



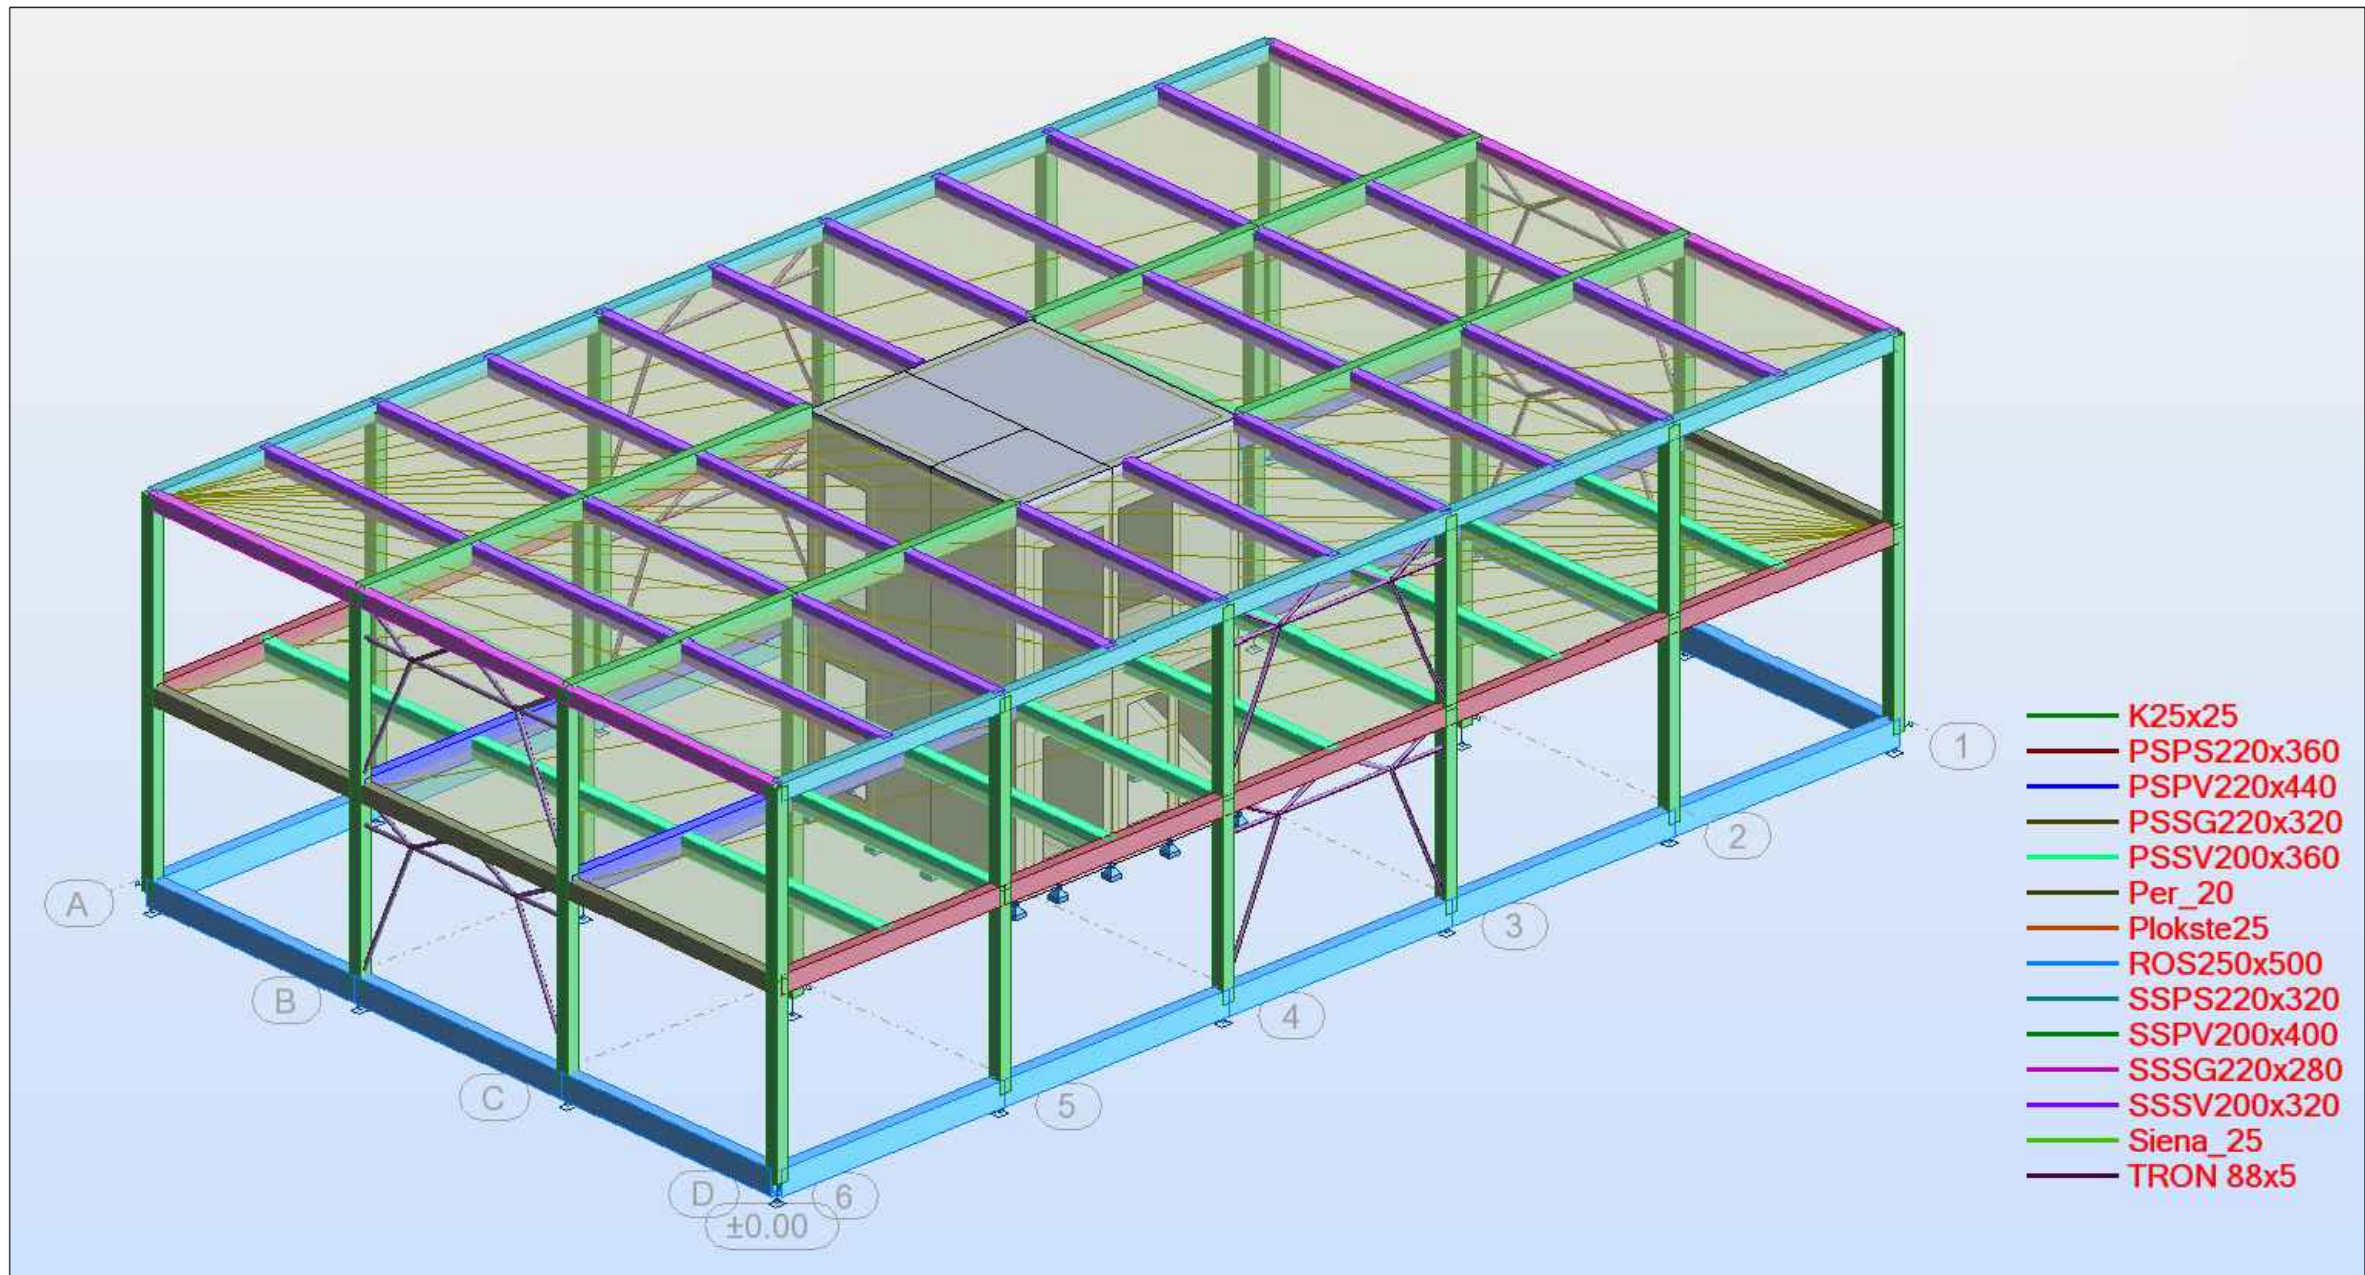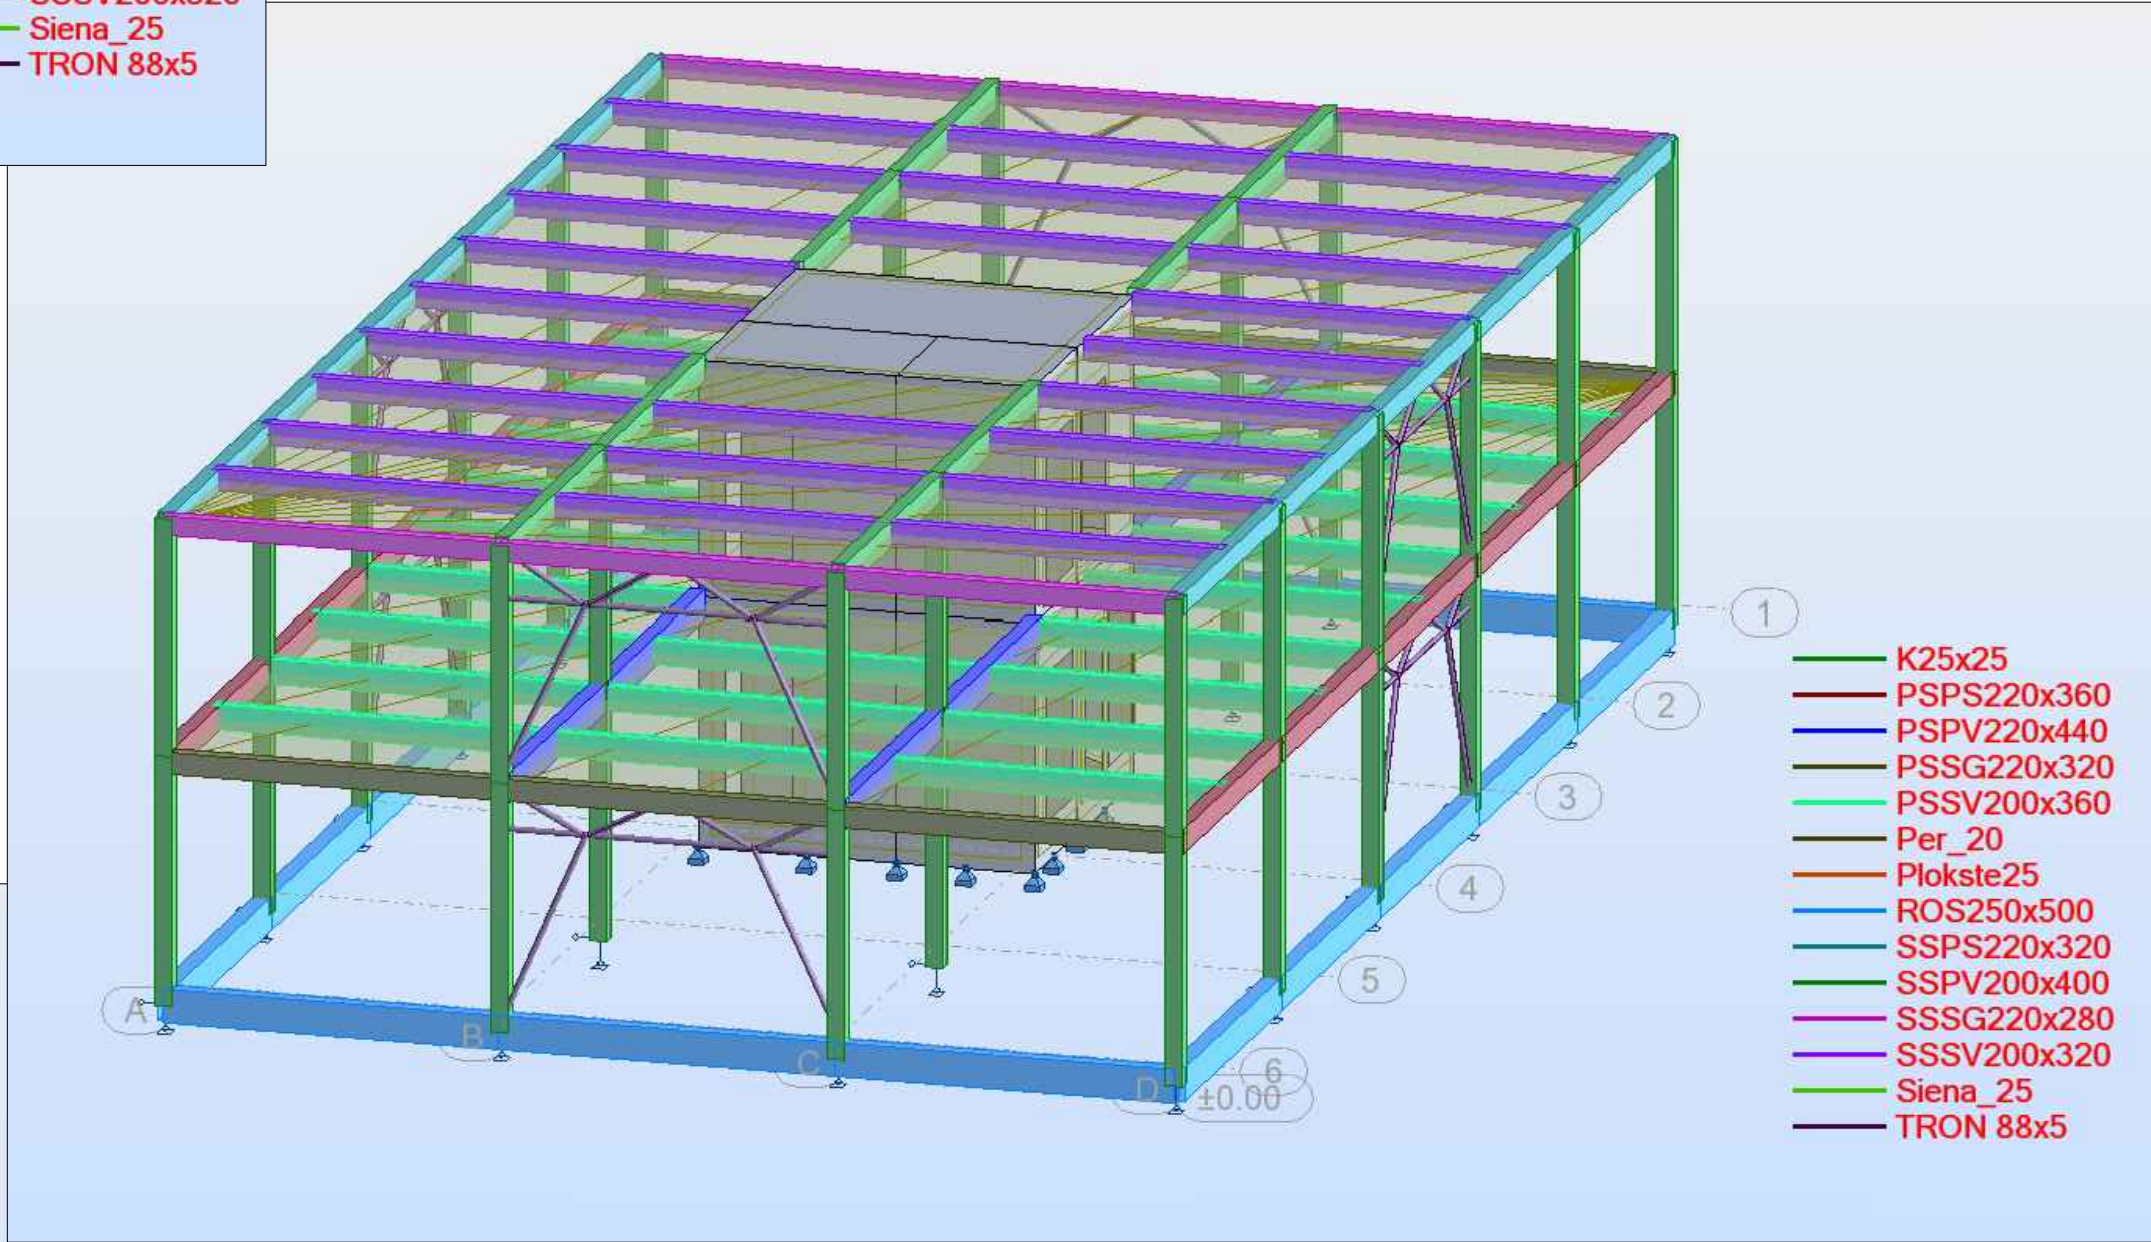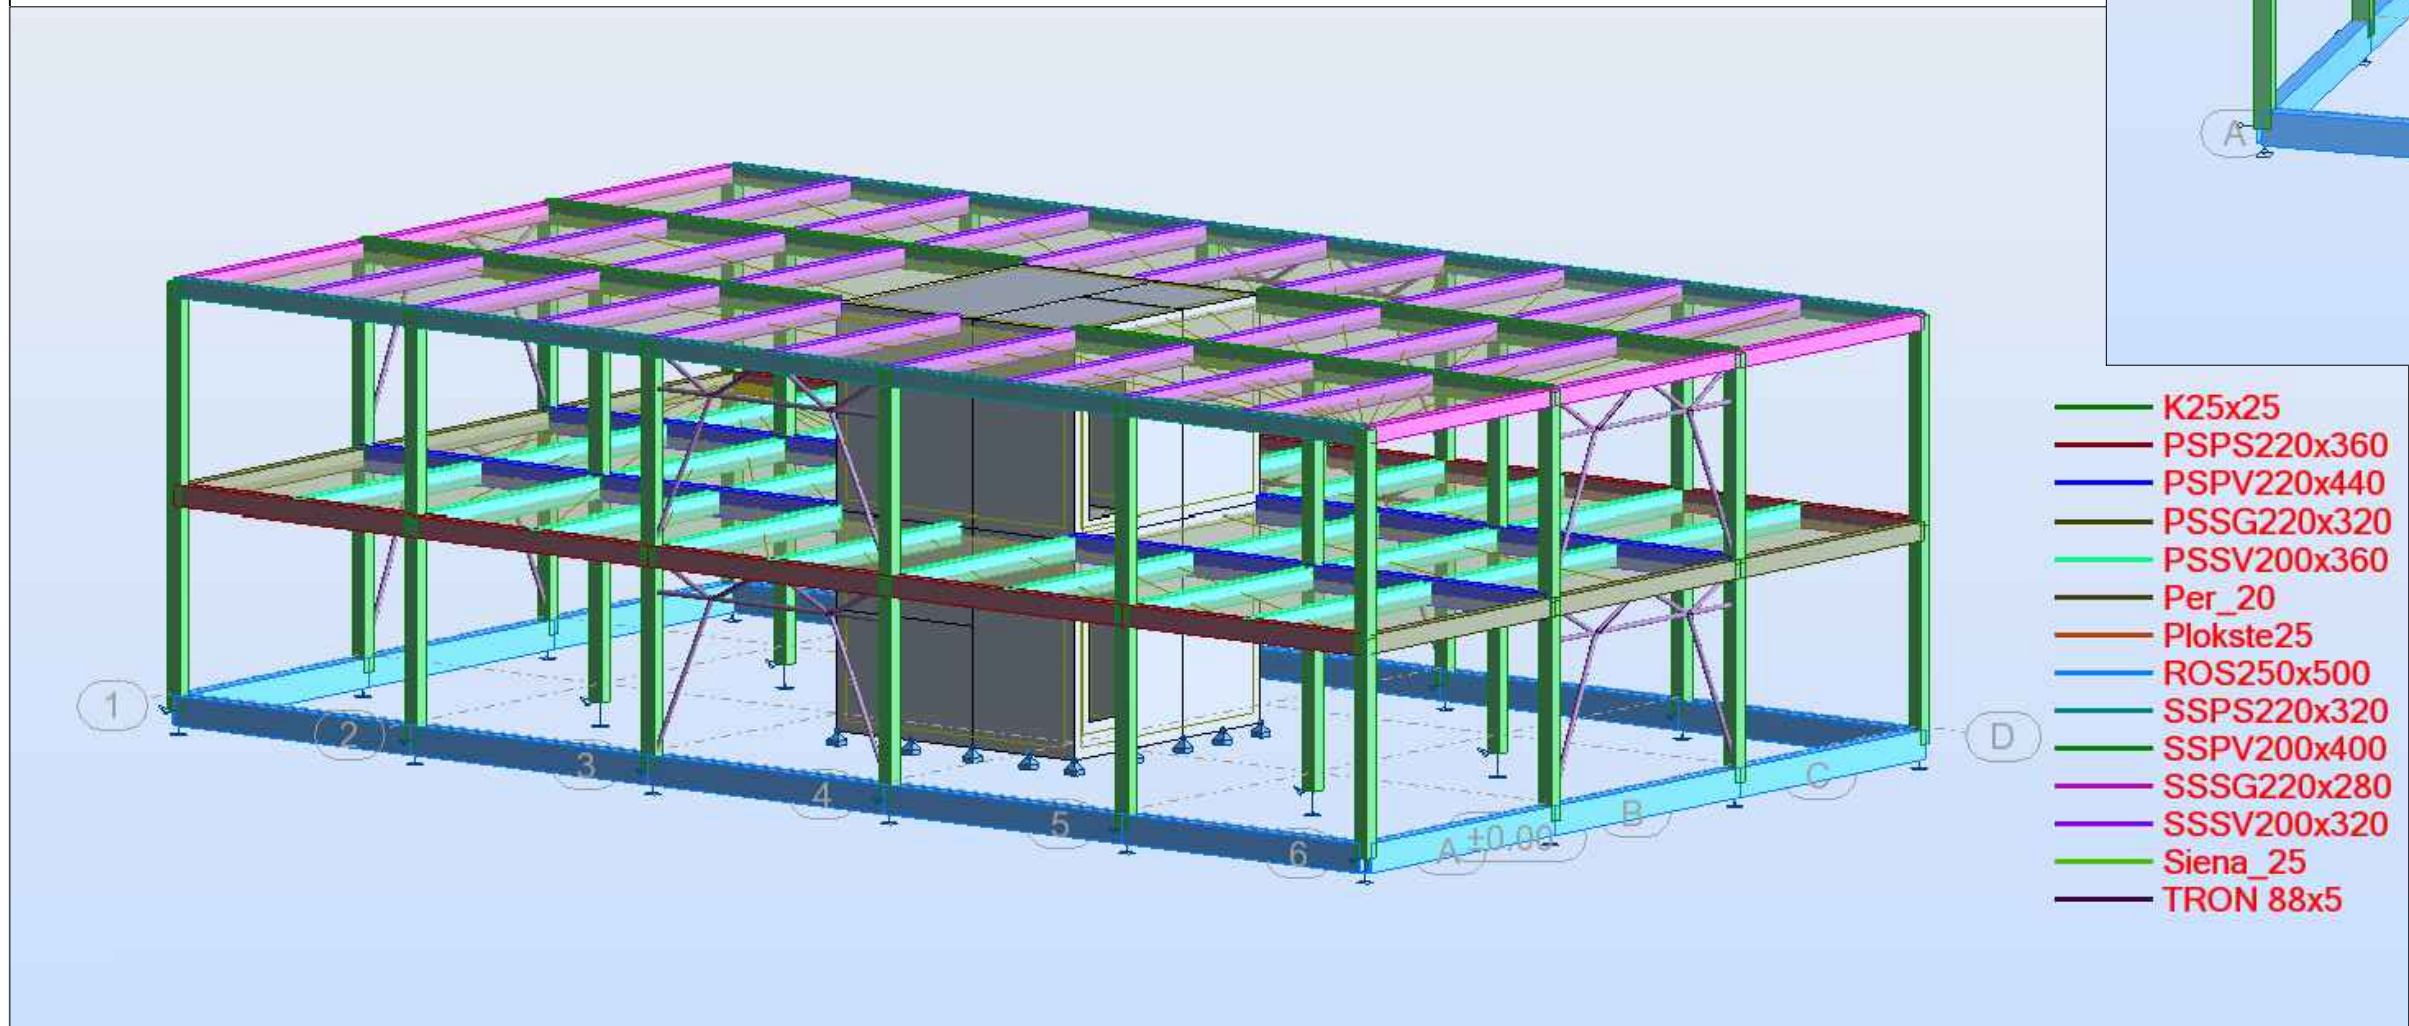

|                            |                                                                                                                      |                                                                                                                                                                      |                      |                                                                                                                          |         |                                                               |
|----------------------------|----------------------------------------------------------------------------------------------------------------------|----------------------------------------------------------------------------------------------------------------------------------------------------------------------|----------------------|--------------------------------------------------------------------------------------------------------------------------|---------|---------------------------------------------------------------|
| KVAL.<br>PATV.<br>DOK. NR. |                                                                                                                      | UAB "Konstrukcijų pasaulis"<br>Jonavos g. 260, Kaunas<br>Įm. k.: 304690224<br>Tel. +370 (613) 98089<br>El.p.: k.pazereckas@gmail.com<br>www.konstrukciju-pasaulis.lt |                      | STATINIO PROJEKTO PAVADINIMAS<br>Negyvenamasis 2 aukštų klijuotosios medienos konstrukcijų mokslo<br>paskirties pastatas |         |                                                               |
|                            |                                                                                                                      | 37603                                                                                                                                                                | PDV                  | Kęstutis Pažereckas                                                                                                      | 2018 08 | DOKUMENTO PAVADINIMAS<br>Konstrukcinio modelio vizualizacijos |
| 37603                      | Konstr.                                                                                                              | Kęstutis Pažereckas                                                                                                                                                  | 2018 08              |                                                                                                                          |         | LAIDA<br>O                                                    |
| LT                         | UŽSAKOVAS                                                                                                            |                                                                                                                                                                      | BREŽINIO ŽYMUO       |                                                                                                                          | LAPAS   | LAPŲ                                                          |
|                            | Miškų institutas, Lietuvos agrarinių ir miškų mokslų<br>centro filialas, Liepų g. 1, Girionių k., LT-53101, Kauno r. |                                                                                                                                                                      | KPRS18/02-TP-SK-2.18 |                                                                                                                          | 1       | 1                                                             |
