# Supplementary material for: Sustainability Impacts of Wood- and Concrete-Based Frame Buildings
Source: MDPI journal article supplement (doi:10.3390/su15021560), 2023-01-13
Supplement: s1 [file s1]

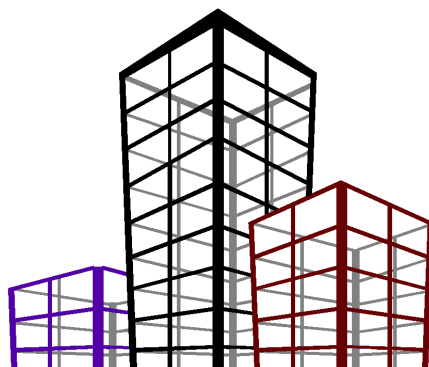

**UAB „KONSTRUKCIJŲ PASAULIS“**

Jonavos g. 260, Kaunas, LT-44131  
 Įm. k.: 304690224. Tel.: +370 (613) 98089;  
 el. p.: k.pazereckas@gmail.com  
 www.konstrukciju-pasaulis.lt

|                               |                         |                                                                                                                   |       |
|-------------------------------|-------------------------|-------------------------------------------------------------------------------------------------------------------|-------|
| <b>Projekto pavadinimas</b>   |                         | <b>Negyvenamasis 5 aukštų klijuotosios medienos konstrukcijų mokslo paskirties pastatas</b>                       |       |
| Užsakovas                     |                         | Miškų institutas, Lietuvos agrarinių ir miškų mokslų centro filialas. Liepų g. 1, Girionių k., LT-53101, Kauno r. |       |
| Statybos rūšis                |                         | Nauja statyba                                                                                                     |       |
| Naudojimo paskirtis           |                         | Negyvenamoji (mokslo paskirties)                                                                                  |       |
| Kategorija                    |                         | Ypatingas                                                                                                         |       |
| Projekto etapas               |                         | Techninis projektas (TP)                                                                                          |       |
| <b>Projekto dalis / žymuo</b> |                         | <b>Konstrukcijų dalis KPRS18/02-TP-SK</b>                                                                         |       |
| UAB Konstrukcijų pasaulis     | Direktorius             | Kęstutis Pažereckas                                                                                               |       |
|                               | Projekto dalies vadovas | Kęstutis Pažereckas                                                                                               | 37603 |
|                               | Projektuotojas          | Kęstutis Pažereckas                                                                                               | 37603 |

Kaunas 2018 m.

**2. DOKUMENTŲ ŽINIARAŠTIS****2.1. Projekto dalies bylos (segtuvo) dokumentų sudėties žiniaraštis**

| Dokumento žymuo      | Lapų sk. | Laida | Dokumento pavadinimas                                                           | Pastabos |
|----------------------|----------|-------|---------------------------------------------------------------------------------|----------|
| KPRS18/02-TP-SK-DŽ   | 1        | 0     | Dokumentų sudėties žiniaraštis                                                  |          |
| KPRS18/02-TP-SK-4.1  | 1        | 0     | Polių skaičiuotinių apkrovų planas                                              |          |
| KPRS18/02-TP-SK-4.2  | 1        | 0     | Polių charakteristinių apkrovų planas                                           |          |
| KPRS18/02-TP-SK-4.3  | 1        | 0     | Polių pamatų planas                                                             |          |
| KPRS18/02-TP-SK-4.4  | 1        | 0     | Polių galvenų ir rostverkų planas                                               |          |
| KPRS18/02-TP-SK-4.5  | 1        | 0     | Polių galvenos                                                                  |          |
| KPRS18/02-TP-SK-4.6  | 1        | 0     | Rostverkai                                                                      |          |
| KPRS18/02-TP-SK-4.7  | 1        | 0     | Pirmo aukšto planas                                                             |          |
| KPRS18/02-TP-SK-4.8  | 1        | 0     | Kolonos tvirtinimo su pamatu ir ryšiu mazgas                                    |          |
| KPRS18/02-TP-SK-4.9  | 1        | 0     | Pirmo/antro/trečio/ketvirto aukštų perdangų sijų planas                         |          |
| KPRS18/02-TP-SK-4.10 | 1        | 0     | Pirmo/antro/trečio/ketvirto aukštų perdangų ilginių (paskirstomųjų sijų) planas |          |
| KPRS18/02-TP-SK-4.11 | 1        | 0     | Antro/trečio/ketvirto/penkto aukštų planas                                      |          |
| KPRS18/02-TP-SK-4.12 | 1        | 0     | Denginio sijų planas                                                            |          |
| KPRS18/02-TP-SK-4.13 | 1        | 0     | Denginio ilginių (paskirstomųjų sijų) planas                                    |          |
| KPRS18/02-TP-SK-4.14 | 1        | 0     | Pjūvis A-A                                                                      |          |
| KPRS18/02-TP-SK-4.15 | 1        | 0     | Pjūvis B-B                                                                      |          |
| KPRS18/02-TP-SK-4.16 | 1        | 0     | Atitvarų detalės                                                                |          |
| KPRS18/02-TP-SK-4.17 | 1        | 0     | Vertikalieji ryšiai VR-1                                                        |          |
| KPRS18/02-TP-SK-4.18 | 1        | 0     | Konstrukcinio modelio vizualizacijos                                            |          |

|                               |                                                                                                                                |                                                                                                                                                                       |         |                                                                                                                       |  |       |
|-------------------------------|--------------------------------------------------------------------------------------------------------------------------------|-----------------------------------------------------------------------------------------------------------------------------------------------------------------------|---------|-----------------------------------------------------------------------------------------------------------------------|--|-------|
| KVAL.<br>PATV.<br>DOK.<br>NR. | 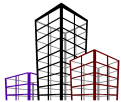                                            | UAB „Konstrukcijų pasaulis“<br>Jonavos g. 260, Kaunas.<br>Įm. k.: 304690224.<br>Tel. +370 (613) 98089<br>el.p. k.pazereckas@gmail.com<br>www.konstrukciju-pasaulis.lt |         | STATINIO PROJEKTO PAVADINIMAS<br>Negyvenamasis 5 aukštų klijuotosios medienos konstrukcijų mokslo paskirties pastatas |  |       |
| 37603                         | PDV                                                                                                                            | K. Pažereckas                                                                                                                                                         | 2018 08 | DOKUMENTO PAVADINIMAS<br>Dokumentų žiniaraštis                                                                        |  | LAIDA |
| 37603                         | Konstr.                                                                                                                        | K. Pažereckas                                                                                                                                                         | 2018 08 |                                                                                                                       |  | 0     |
|                               |                                                                                                                                |                                                                                                                                                                       |         |                                                                                                                       |  |       |
| LT                            | UŽSAKOVAS<br>Miškų institutas, Lietuvos agrarinių ir miškų mokslų centro filialas. Liepų g. 1, Girionių k., LT-53101, Kauno r. |                                                                                                                                                                       |         | DOKUMENTO ŽYMUO<br>KPRS18/02-TP-SK-DŽ                                                                                 |  | LAPAS |
|                               |                                                                                                                                |                                                                                                                                                                       |         |                                                                                                                       |  | LAPŲ  |
|                               |                                                                                                                                |                                                                                                                                                                       |         |                                                                                                                       |  | 1     |
|                               |                                                                                                                                |                                                                                                                                                                       |         |                                                                                                                       |  | 1     |

POLIŲ SKAIČIUOTINIŲ APKROVŲ PLANAS MASTELIS 1:100

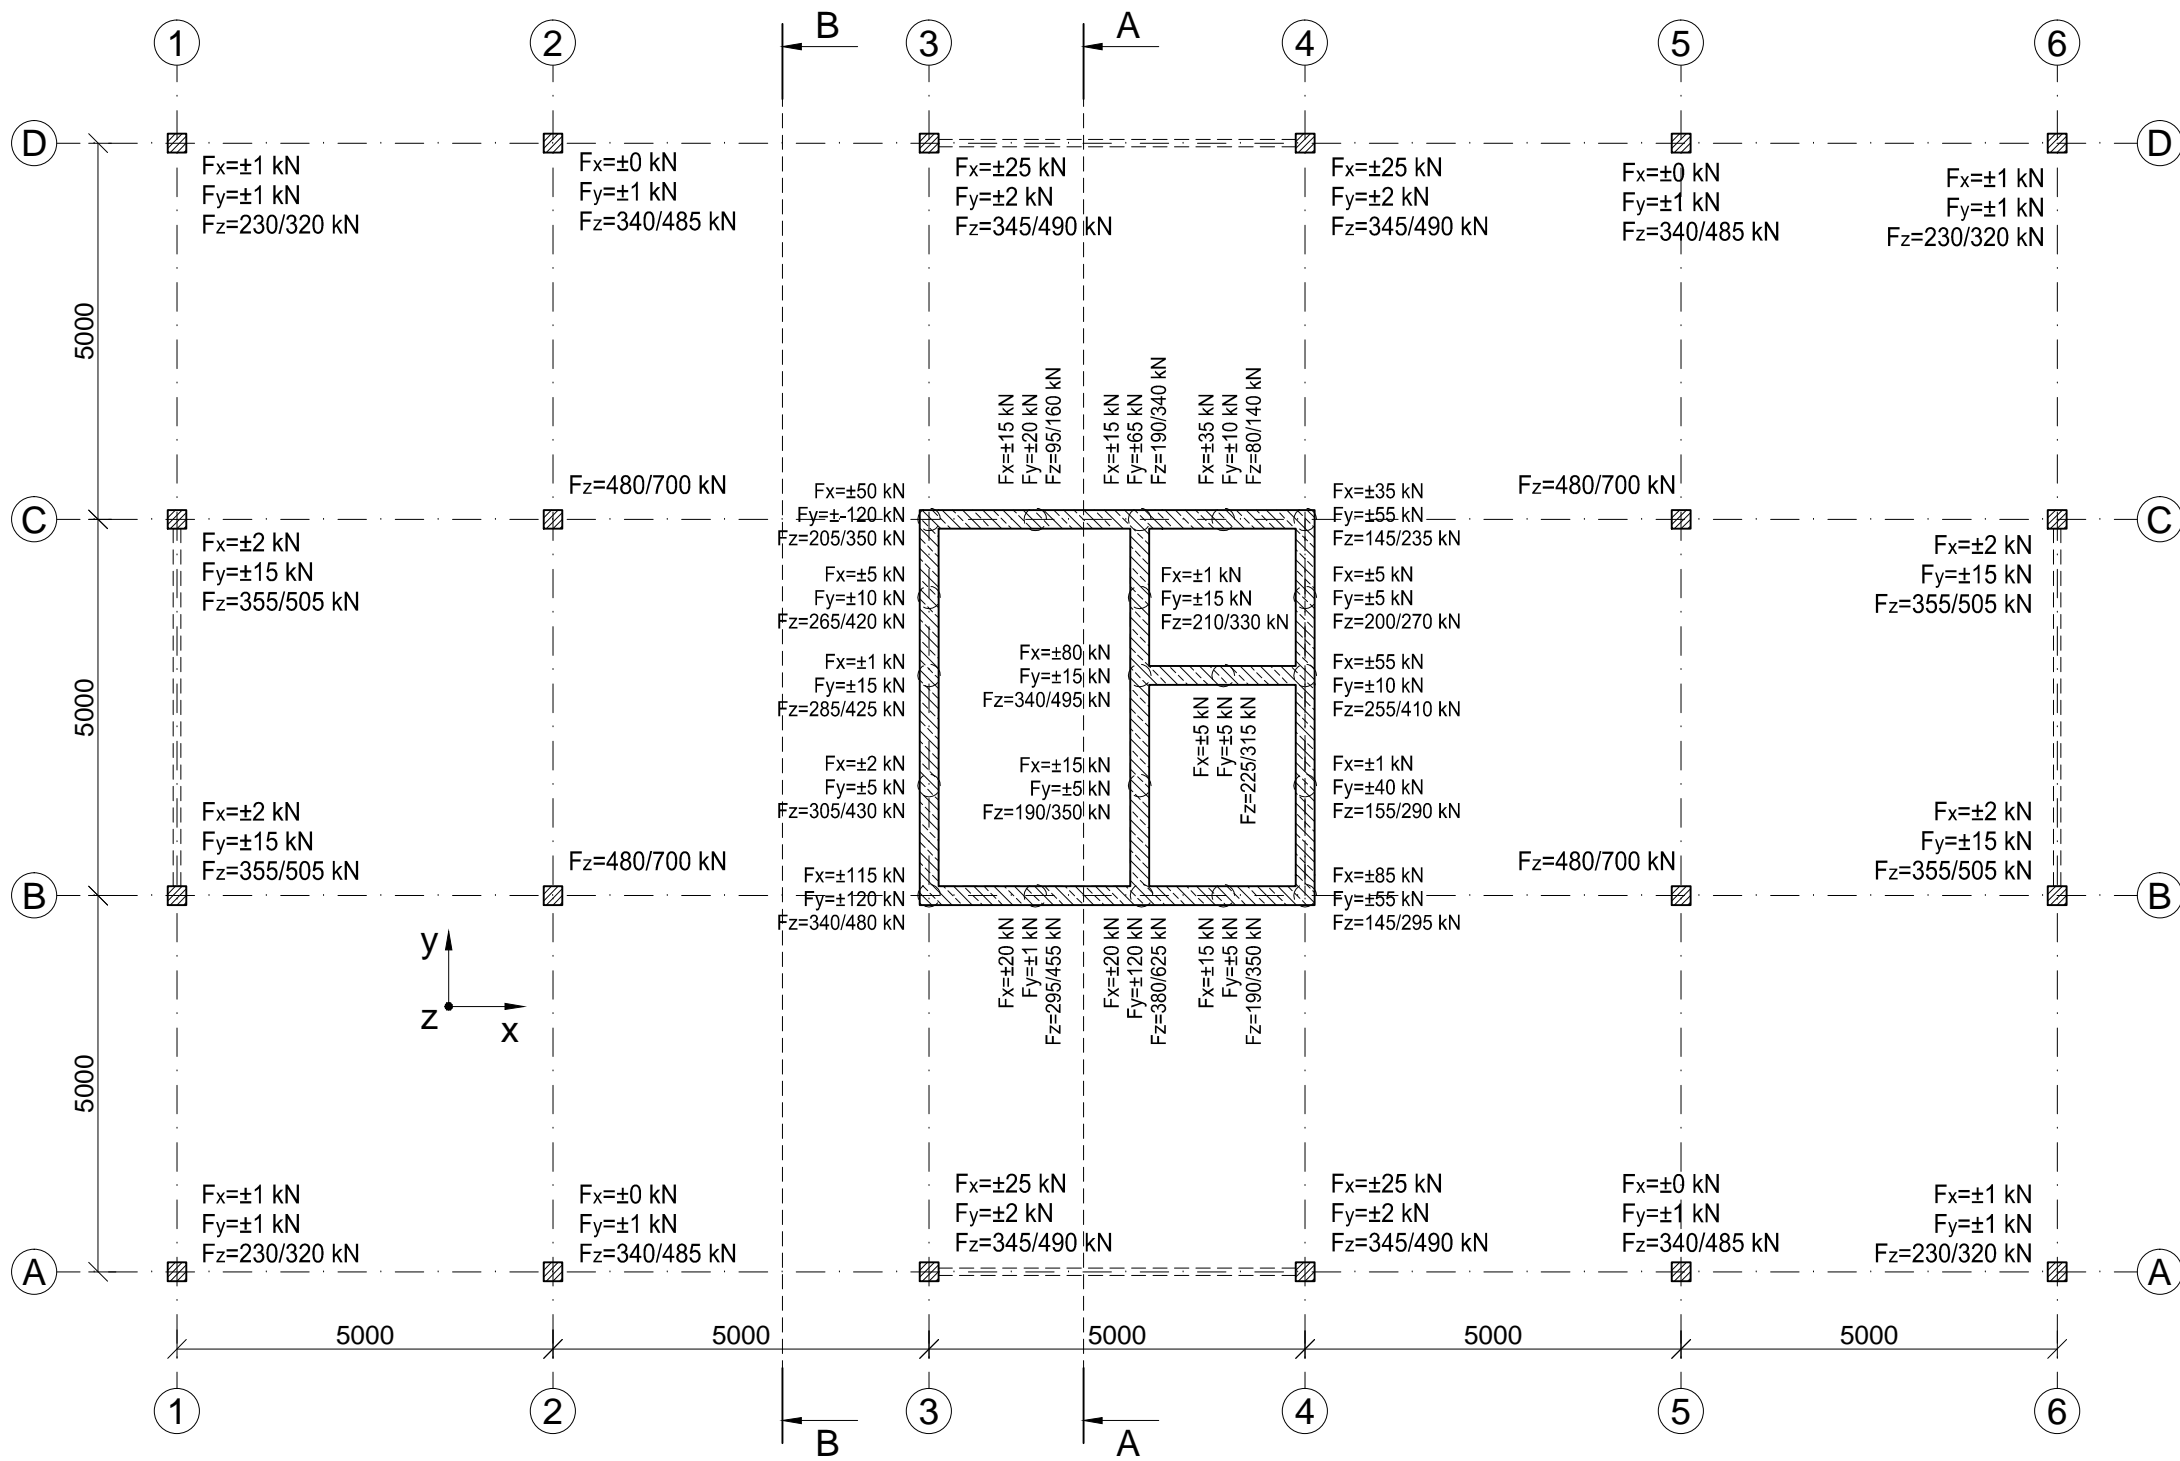

- PASTABOS:
- Skaiciuojamosios pamatų apkrovos apskaičiuotos taikant  $\gamma_g=1.35$  koeficientą nuolatinėms apkrovoms,  $\gamma_q=\gamma_s=\gamma_w=1.30$  kintamoms (naudojimo, sniego ir vėjo) apkrovoms.
  - Polinių pamatų ir polių galvenų svoris neįvertintas.
  - Polinių pamatų skaičiuotiniai svoriai:
    - Ø300, 3,0m poliaus - 7.0 kN
    - Ø300, 5,0m poliaus - 12.0 kN
    - Ø300, 6,0m poliaus - 14.5 kN
    - Ø300, 9,0m poliaus - 21.5 kN
    - Ø400, 8,0m poliaus - 34.0 kN
    - Ø400, 9,0m poliaus - 38.0 kN
    - Ø400, 10,0m poliaus - 42.5 kN
    - Ø500, 10,0m poliaus - 66.5 kN
  - Polių galvenų skaičiuotiniai svoriai:
    - PG-1 galvena - 59.5 kN
    - PG-2 galvena - 38.0 kN

|                            |         |                                                                                                                                       |         |                                                                                                                   |  |       |
|----------------------------|---------|---------------------------------------------------------------------------------------------------------------------------------------|---------|-------------------------------------------------------------------------------------------------------------------|--|-------|
| KVAL.<br>PATV.<br>DOK. NR. |         | UAB "Konstrukcijų pasaulis"                                                                                                           |         | STATINIO PROJEKTO PAVADINIMAS                                                                                     |  |       |
|                            |         | Jonavos g. 260, Kaunas<br>Įm. k.: 304690224<br>Tel. +370 (613) 98089<br>El.p.: k.pazereckas@gmail.com<br>www.konstrukciju-pasaulis.lt |         | Negyvenamasis 5 aukštų klijuotosios medienos konstrukcijų mokslo paskirties pastatas                              |  |       |
|                            |         |                                                                                                                                       |         |                                                                                                                   |  |       |
| 37603                      | PDV     | Kęstutis Pažereckas                                                                                                                   | 2018 08 | DOKUMENTO PAVADINIMAS                                                                                             |  | LAIDA |
| 37603                      | Konstr. | Kęstutis Pažereckas                                                                                                                   | 2018 08 | Polių skaičiuotinių apkrovų planas                                                                                |  | O     |
|                            |         |                                                                                                                                       |         | BRĖŽINIO ŽYMUO                                                                                                    |  | LAPAS |
| LT                         |         |                                                                                                                                       |         | UŽSAKOVAS                                                                                                         |  | LAPŲ  |
|                            |         |                                                                                                                                       |         | Miškų institutas, Lietuvos agrarinių ir miškų mokslų centro filialas, Liepų g. 1, Girionių k., LT-53101, Kauno r. |  |       |
|                            |         |                                                                                                                                       |         | KPRS18/02-TP-SK-4.1                                                                                               |  | 1     |
|                            |         |                                                                                                                                       |         |                                                                                                                   |  | 1     |

POLIŲ CHARAKTERISTINIŲ APKROVŲ PLANAS MASTELIS 1:100

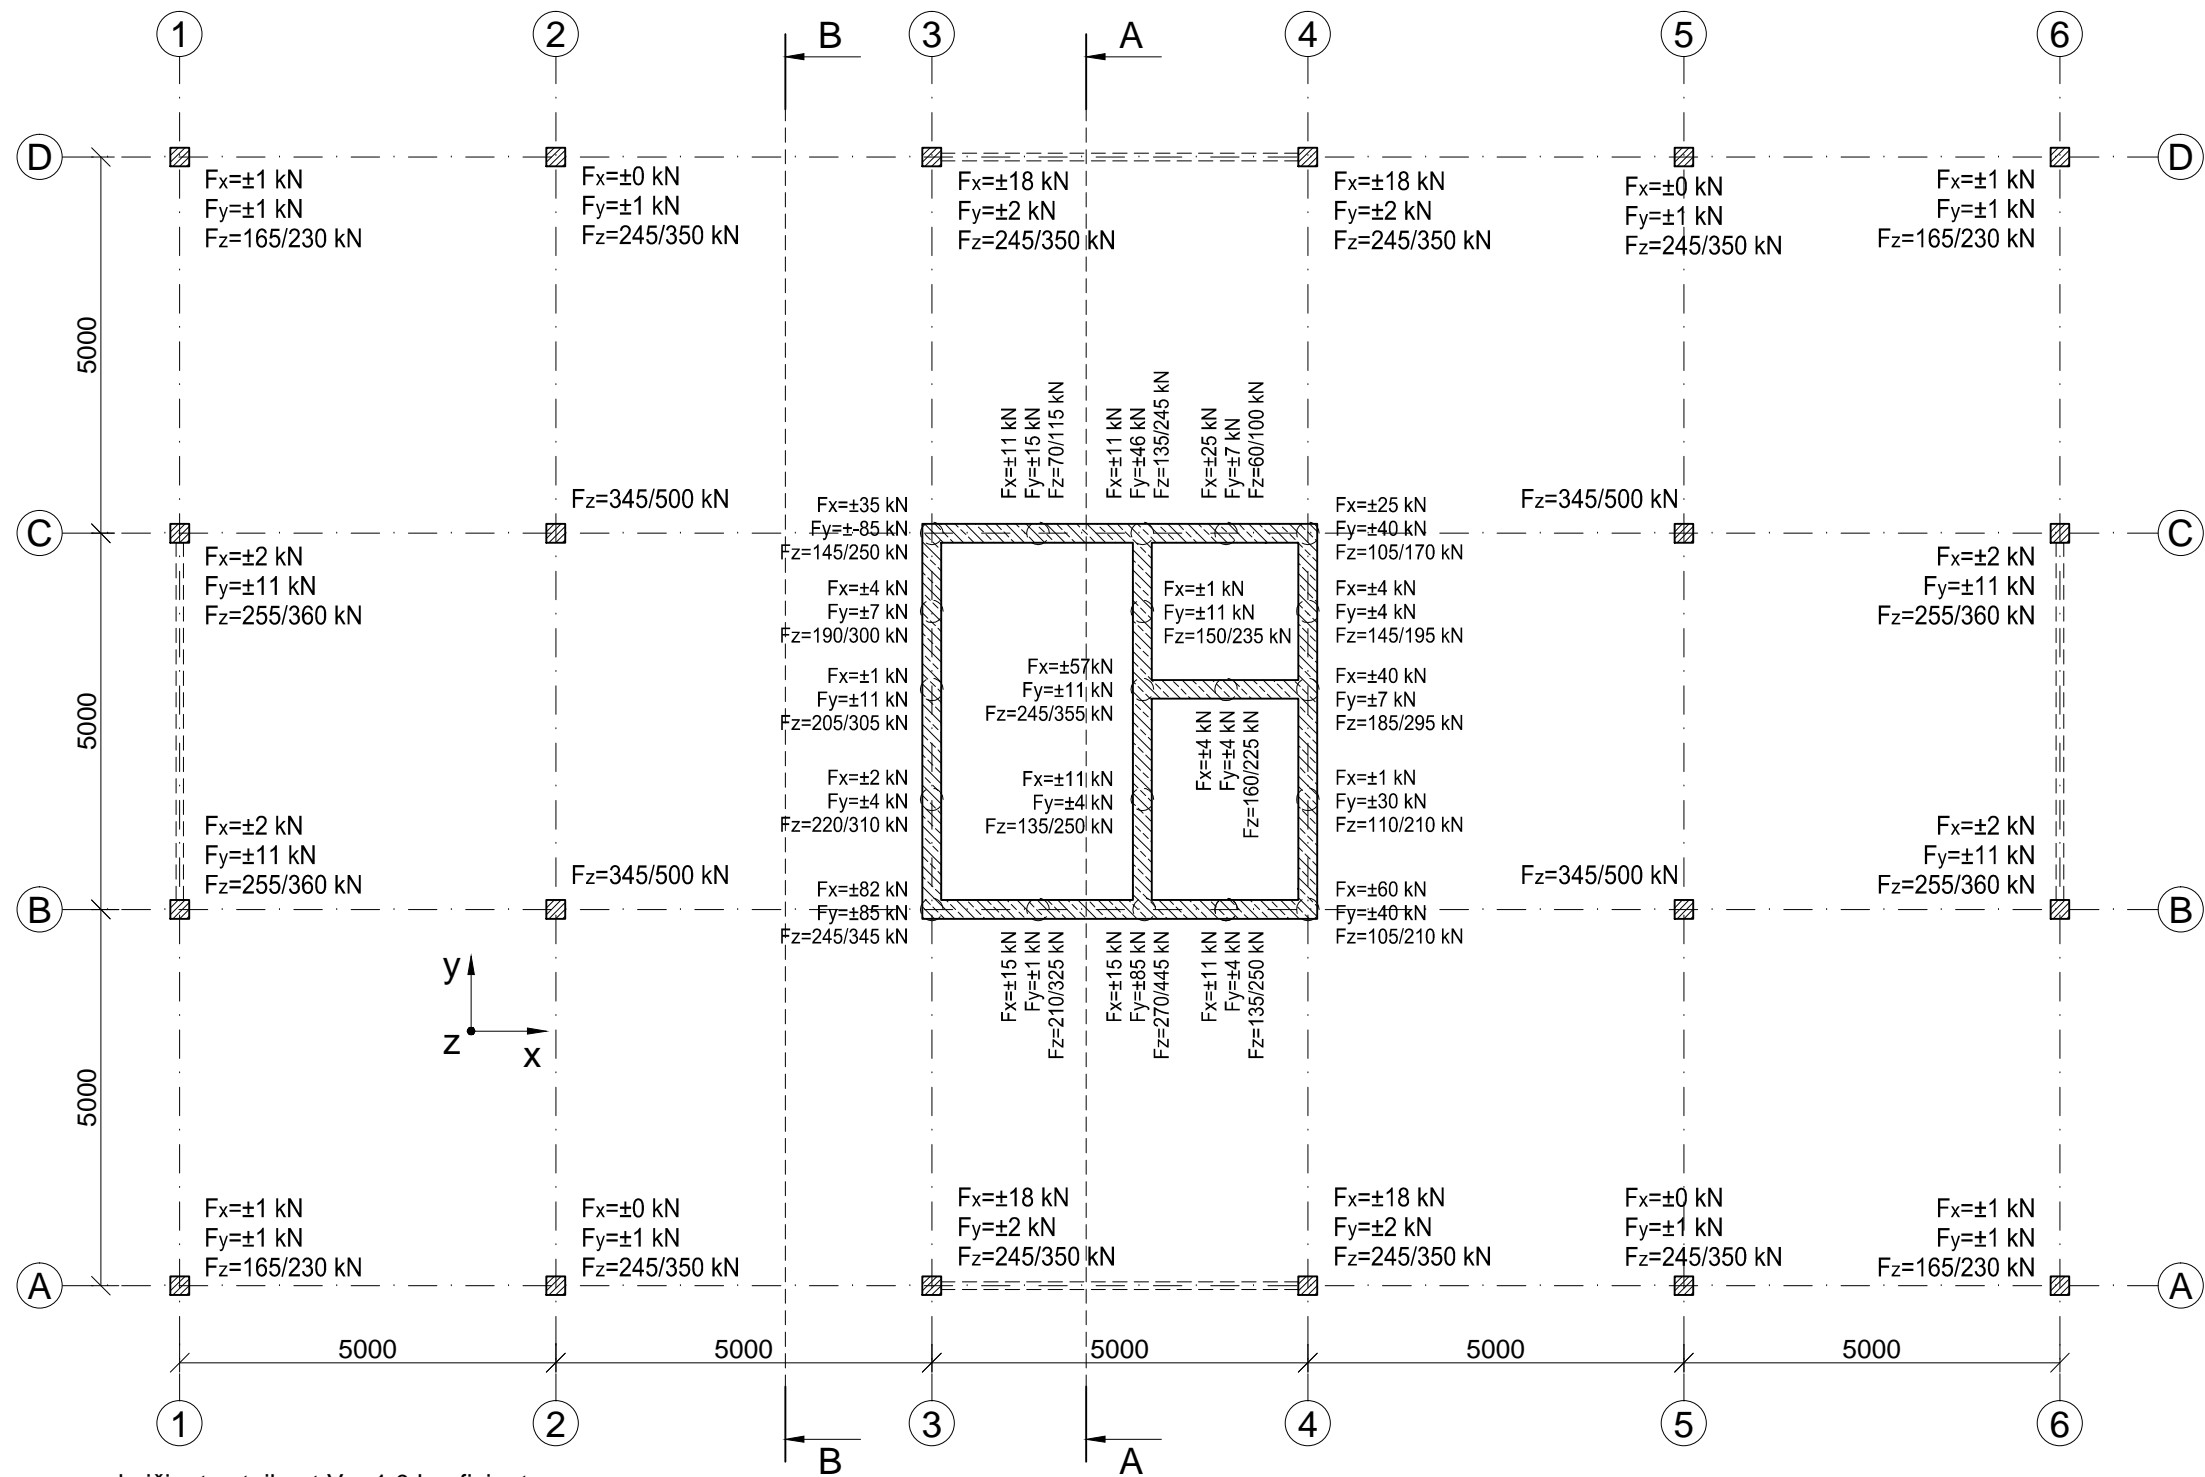

- PASTABOS:
- 1. Charakteristinės pamatų apkrovos apskaičiuotos taikant  $\gamma_g=1.0$  koeficientą nuolatinėms apkrovoms,  $\gamma_q=\gamma_s=\gamma_w=1.00$  kintamoms (naudojimo, sniego ir vėjo) apkrovoms.
  - 2. Polinių pamatų ir polių galvenų svoris neįvertintas.
  - 3. Polinių pamatų charakteristiniai svoriai:
    - Ø300, 3,0m poliaus - 5.5 kN
    - Ø300, 5,0m poliaus - 9.0 kN
    - Ø300, 6,0m poliaus - 10.5 kN
    - Ø300, 9,0m poliaus - 16.0 kN
    - Ø400, 8,0m poliaus - 25.0 kN
    - Ø400, 9,0m poliaus - 28.0 kN
    - Ø400, 10,0m poliaus - 31.5 kN
    - Ø500, 10,0m poliaus - 49.5 kN
  - 4. Polių galvenų charakteristiniai svoriai:
    - PG-1 galvena - 44.0 kN
    - PG-2 galvena - 28.0 kN

|                            |         |                                                                                                                                       |         |                                                                                                                   |  |       |
|----------------------------|---------|---------------------------------------------------------------------------------------------------------------------------------------|---------|-------------------------------------------------------------------------------------------------------------------|--|-------|
| KVAL.<br>PATV.<br>DOK. NR. |         | UAB "Konstrukcijų pasaulis"                                                                                                           |         | STATINIO PROJEKTO PAVADINIMAS                                                                                     |  |       |
|                            |         | Jonavos g. 260, Kaunas<br>Įm. k.: 304690224<br>Tel. +370 (613) 98089<br>El.p.: k.pazereckas@gmail.com<br>www.konstrukciju-pasaulis.lt |         | Negyvenamasis 5 aukštų klijuotosios medienos konstrukcijų mokslo paskirties pastatas                              |  |       |
|                            |         |                                                                                                                                       |         |                                                                                                                   |  |       |
| 37603                      | PDV     | Kęstutis Pažereckas                                                                                                                   | 2018 08 | DOKUMENTO PAVADINIMAS                                                                                             |  | LAIDA |
| 37603                      | Konstr. | Kęstutis Pažereckas                                                                                                                   | 2018 08 | Polių charakteristinių apkrovų planas                                                                             |  | O     |
|                            |         |                                                                                                                                       |         | BRĖŽINIO ŽYMUO                                                                                                    |  | LAPAS |
|                            |         |                                                                                                                                       |         | KPRS18/02-TP-SK-4.2                                                                                               |  | LAPŲ  |
| LT                         |         |                                                                                                                                       |         | UŽSAKOVAS                                                                                                         |  | 1     |
|                            |         |                                                                                                                                       |         | Miškų institutas, Lietuvos agrarinių ir miškų mokslų centro filialas, Liepų g. 1, Girionių k., LT-53101, Kauno r. |  | 1     |

POLINIŲ PAMATŲ PLANAS MASTELIS 1:100

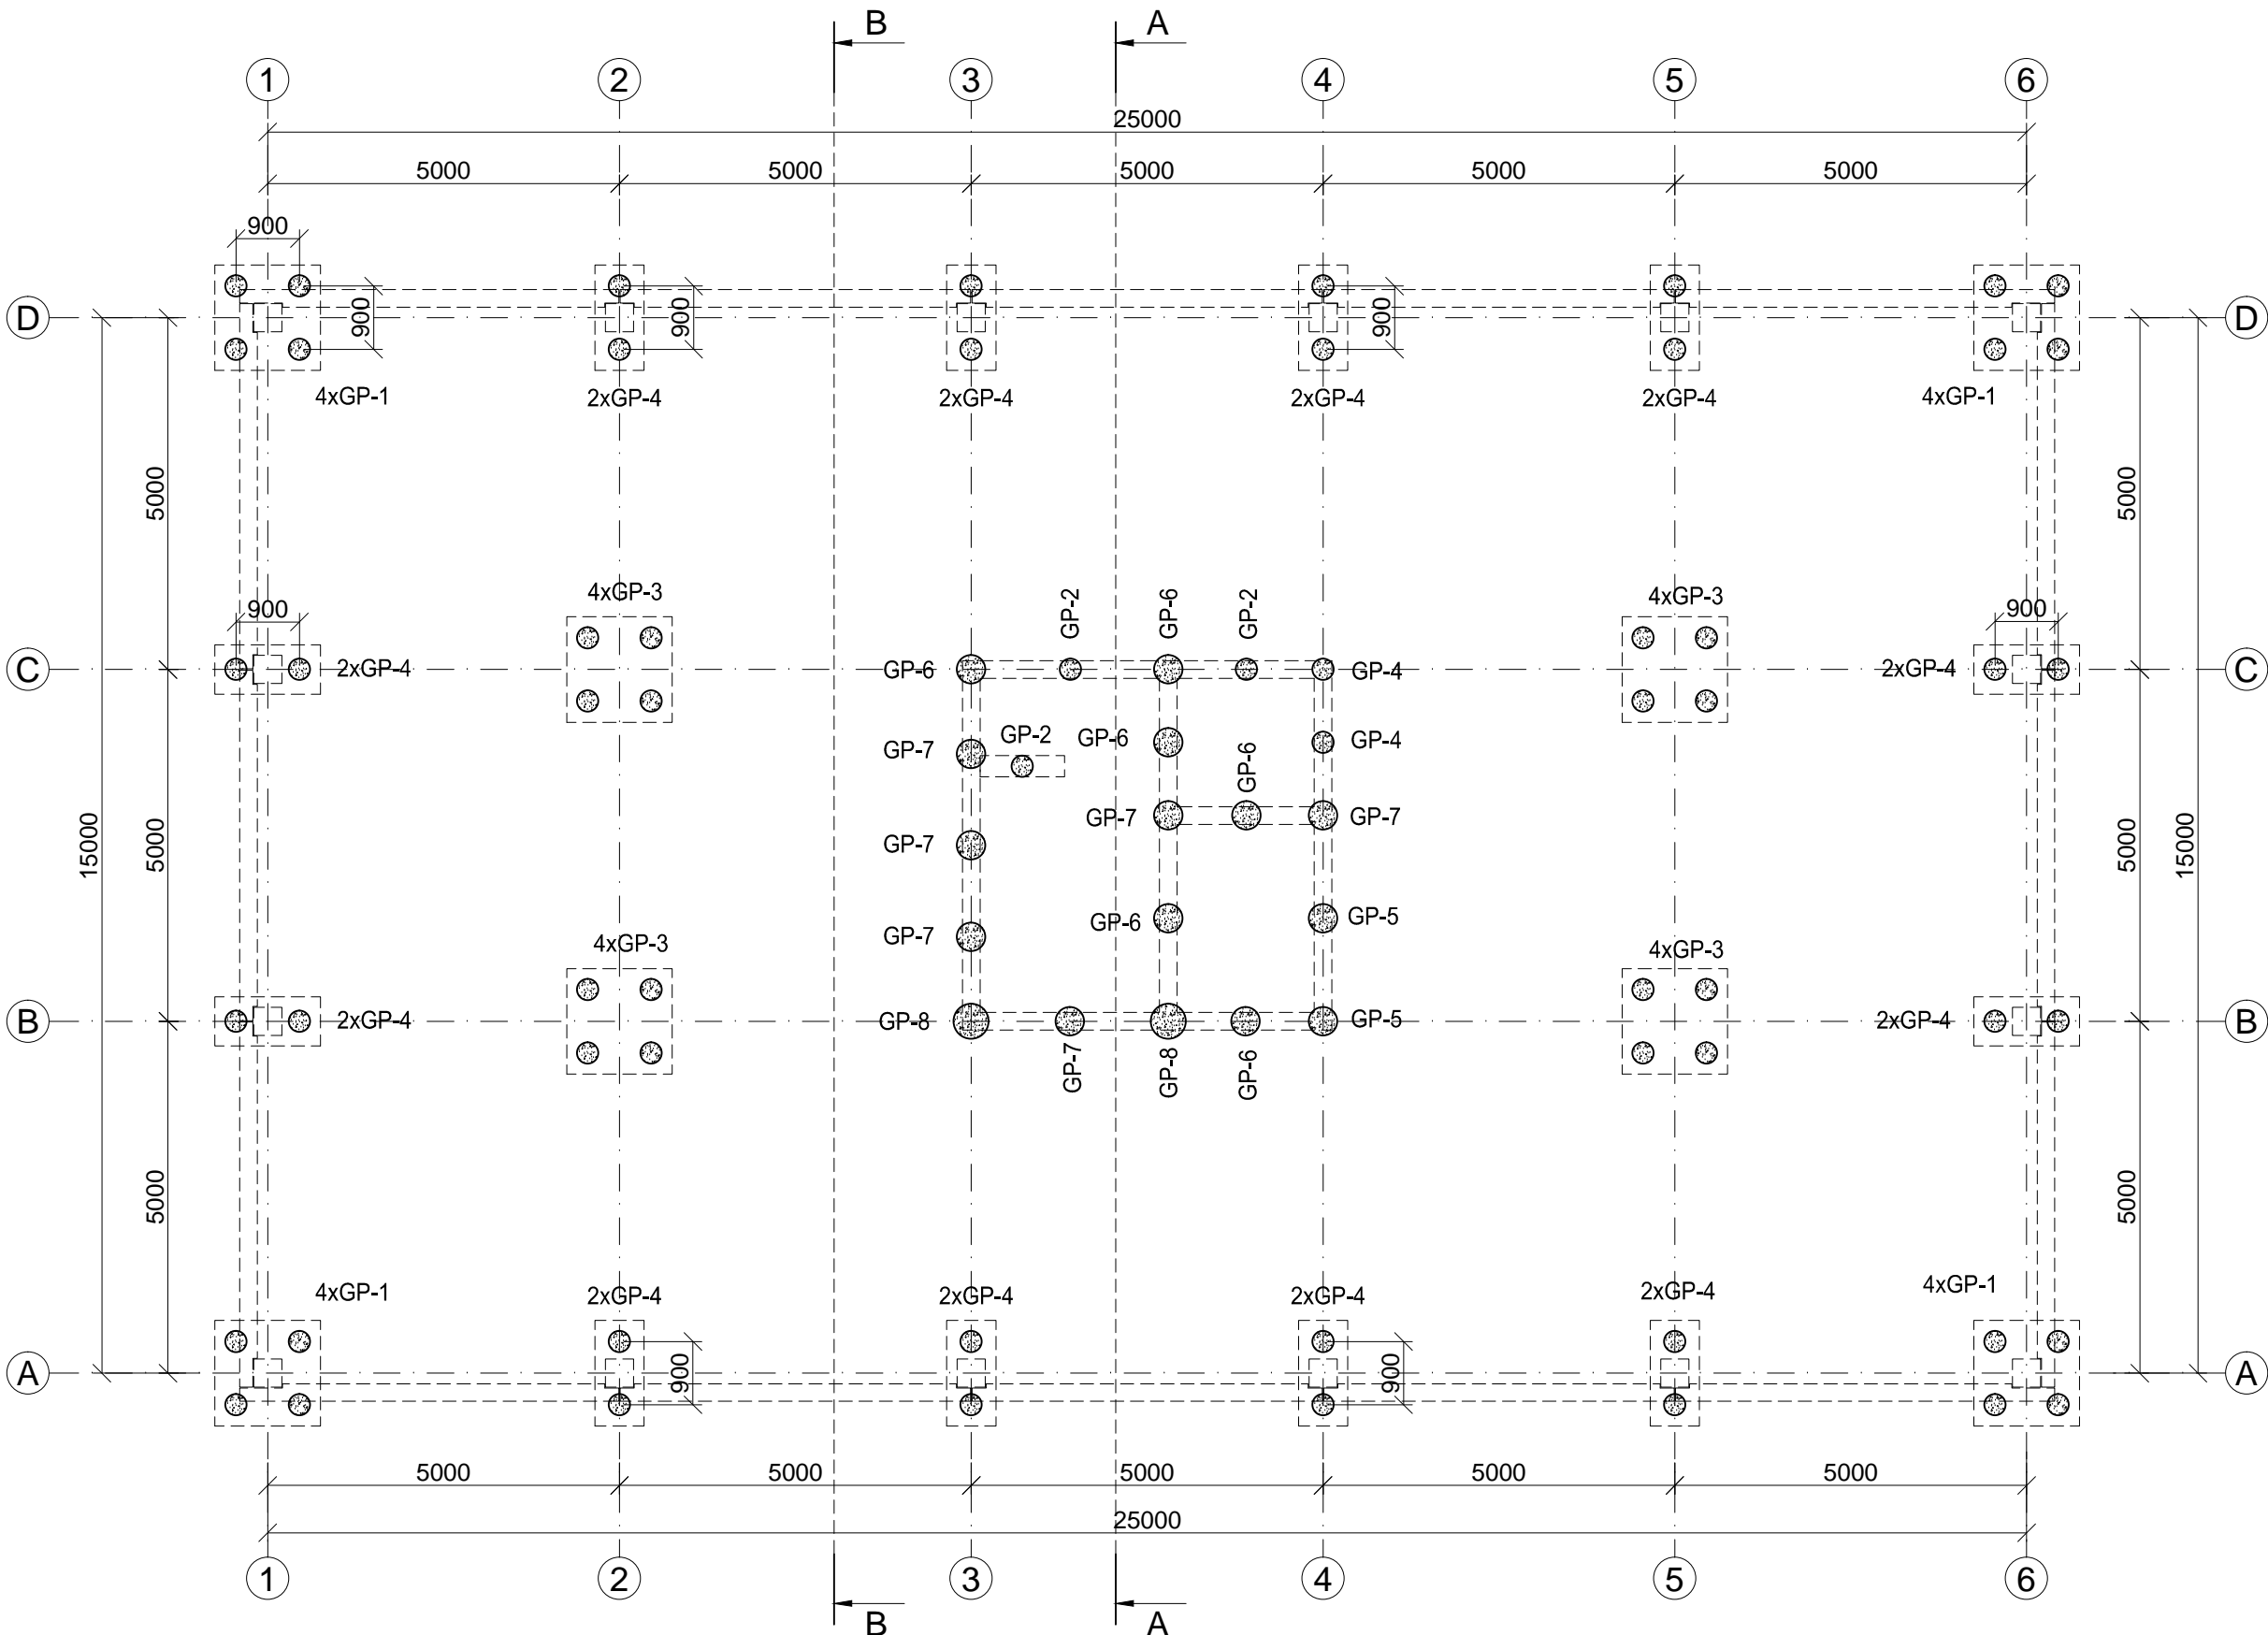

ŽYMĖJIMAS:  
GP-... - Gręžtinis polis;

- PASTABOS:
- Gręžtiniai poliniai pamatai suprojektuoti vidutinio stiprumo ir stipraus smėlingo, dulkingo moreninio molio pagrindui ( $q_c=2.1-3.1$  MPa,  $f_s=79-60$  kPa).
  - Gręžtiniai poliai - Ø300 mm skersmens ir 2,0 - 9,0 m ilgių.
  - Pamatai gali būti įrengiami, tik vadovaujantis darbo projektu. Už pamatų įrengimo darbų kokybę atsako rangovas.
  - Prieš rengiant darbo projektą būtina atlikti vietovės inžinerinius-geologinius tyrinėjimus ir patikslinti polių tipą ir igilinimą.
  - Pamatus gali įrengti tik kvalifikuotas rangovas.
  - Gruntas po pamatais turi būti nejudintas, vientisos struktūros.
  - Pamatai armuojami S500 stiprumo klasės armatūros strypynais, pagal LST EN ISO 15630-1:2010.
  - Pamatams naudojamas C20/25 XC2 stiprumo klasės betonas, pagal LST EN 206-1:2002.

POLINIŲ PAMATŲ ŽINIARAŠTIS

| Žymėjimas | Diametras, mm | Ilgis, mm | Kiekis, vnt. |
|-----------|---------------|-----------|--------------|
| GP-1      | Ø300          | 3000      | 16           |
| GP-2      | Ø300          | 5000      | 3            |
| GP-3      | Ø300          | 6000      | 16           |
| GP-4      | Ø300          | 9000      | 26           |
| GP-5      | Ø400          | 8000      | 2            |
| GP-6      | Ø400          | 9000      | 6            |
| GP-7      | Ø400          | 10000     | 6            |
| GP-8      | Ø500          | 10000     | 2            |

GRĘŽTINIŲ POLINIŲ PAMATŲ SĄNAUDŲ KIEKIŲ ŽINIARAŠTIS

| Eil. Nr.            | Pozicija | Pavadinimas                | Žymuo | Mato vnt. | Kiekis | Sąnaudos |         | Svoris vnt., t | Papildomi duomenys |
|---------------------|----------|----------------------------|-------|-----------|--------|----------|---------|----------------|--------------------|
|                     |          |                            |       |           |        | Vien.    | Iš viso |                |                    |
| 1                   | GP-1     | Polinis pamatas Ø300x3000  |       |           |        |          |         |                |                    |
| 2                   |          | Betonas C20/25 XC2         |       | m³        | 16     | 0.212    | 3.392   |                |                    |
| 3                   |          | Armatūra S500              |       | kg        | 16     | 33.92    | 542.7   |                |                    |
| 4                   | GP-2     | Polinis pamatas Ø300x5000  |       |           |        |          |         |                |                    |
| 5                   |          | Betonas C20/25 XC2         |       | m³        | 3      | 0.354    | 1.062   |                |                    |
| 6                   |          | Armatūra S500              |       | kg        | 3      | 56.64    | 169.9   |                |                    |
| 7                   | GP-3     | Polinis pamatas Ø300x6000  |       |           |        |          |         |                |                    |
| 8                   |          | Betonas C20/25 XC2         |       | m³        | 16     | 0.424    | 6.784   |                |                    |
| 9                   |          | Armatūra S500              |       | kg        | 16     | 67.84    | 1085.5  |                |                    |
| 10                  | GP-4     | Polinis pamatas Ø300x9000  |       |           |        |          |         |                |                    |
| 11                  |          | Betonas C20/25 XC2         |       | m³        | 26     | 0.637    | 16.562  |                |                    |
| 12                  |          | Armatūra S500              |       | kg        | 26     | 101.92   | 2649.9  |                |                    |
| 13                  | GP-5     | Polinis pamatas Ø400x8000  |       |           |        |          |         |                |                    |
| 14                  |          | Betonas C20/25 XC2         |       | m³        | 2      | 1.006    | 2.012   |                |                    |
| 15                  |          | Armatūra S500              |       | kg        | 2      | 150.90   | 301.8   |                |                    |
| 16                  | GP-6     | Polinis pamatas Ø400x9000  |       |           |        |          |         |                |                    |
| 17                  |          | Betonas C20/25 XC2         |       | m³        | 6      | 1.131    | 6.786   |                |                    |
| 18                  |          | Armatūra S500              |       | kg        | 6      | 169.65   | 1017.9  |                |                    |
| 19                  | GP-7     | Polinis pamatas Ø400x10000 |       |           |        |          |         |                |                    |
| 20                  |          | Betonas C20/25 XC2         |       | m³        | 6      | 1.257    | 7.542   |                |                    |
| 21                  |          | Armatūra S500              |       | kg        | 6      | 188.55   | 1131.3  |                |                    |
| 22                  | GP-8     | Polinis pamatas Ø500x10000 |       |           |        |          |         |                |                    |
| 23                  |          | Betonas C20/25 XC2         |       | m³        | 2      | 1.964    | 3.928   |                |                    |
| 24                  |          | Armatūra S500              |       | kg        | 2      | 274.96   | 549.9   |                |                    |
| Viso betono, m³:    |          |                            |       |           |        |          | 48.068  |                |                    |
| Viso armatūros, kg: |          |                            |       |           |        |          | 7448.9  |                |                    |

|                            |                                                                                                                   |                                                                                                                                       |         |                                                                                      |         |                       |      |
|----------------------------|-------------------------------------------------------------------------------------------------------------------|---------------------------------------------------------------------------------------------------------------------------------------|---------|--------------------------------------------------------------------------------------|---------|-----------------------|------|
| KVAL.<br>PATV.<br>DOK. NR. |                                                                                                                   | UAB "Konstrukcijų pasaulis"                                                                                                           |         | STATINIO PROJEKTO PAVADINIMAS                                                        |         |                       |      |
|                            |                                                                                                                   | Jonavos g. 260, Kaunas<br>Įm. k.: 304690224<br>Tel. +370 (613) 98089<br>El.p.: k.pazereckas@gmail.com<br>www.konstrukciju-pasaulis.lt |         | Negyvenamasis 5 aukštų klijuotosios medienos konstrukcijų mokslo paskirties pastatas |         |                       |      |
|                            |                                                                                                                   | 37603                                                                                                                                 | PDV     | Kęstutis Pažereckas                                                                  | 2018 08 | DOKUMENTO PAVADINIMAS |      |
|                            |                                                                                                                   | 37603                                                                                                                                 | Konstr. | Kęstutis Pažereckas                                                                  | 2018 08 | Polių pamatų planas   |      |
|                            |                                                                                                                   |                                                                                                                                       |         |                                                                                      | LAIDA   |                       |      |
|                            |                                                                                                                   |                                                                                                                                       |         |                                                                                      |         | O                     |      |
| LT                         | UŽSAKOVAS                                                                                                         |                                                                                                                                       |         | BRĖŽINIO ŽYMUO                                                                       |         | LAPAS                 | LAPŲ |
|                            | Miškų institutas, Lietuvos agrarinių ir miškų mokslų centro filialas, Liepų g. 1, Girionių k., LT-53101, Kauno r. |                                                                                                                                       |         | KPRS18/02-TP-SK-4.3                                                                  |         | 1                     | 1    |
|                            |                                                                                                                   |                                                                                                                                       |         |                                                                                      |         |                       |      |



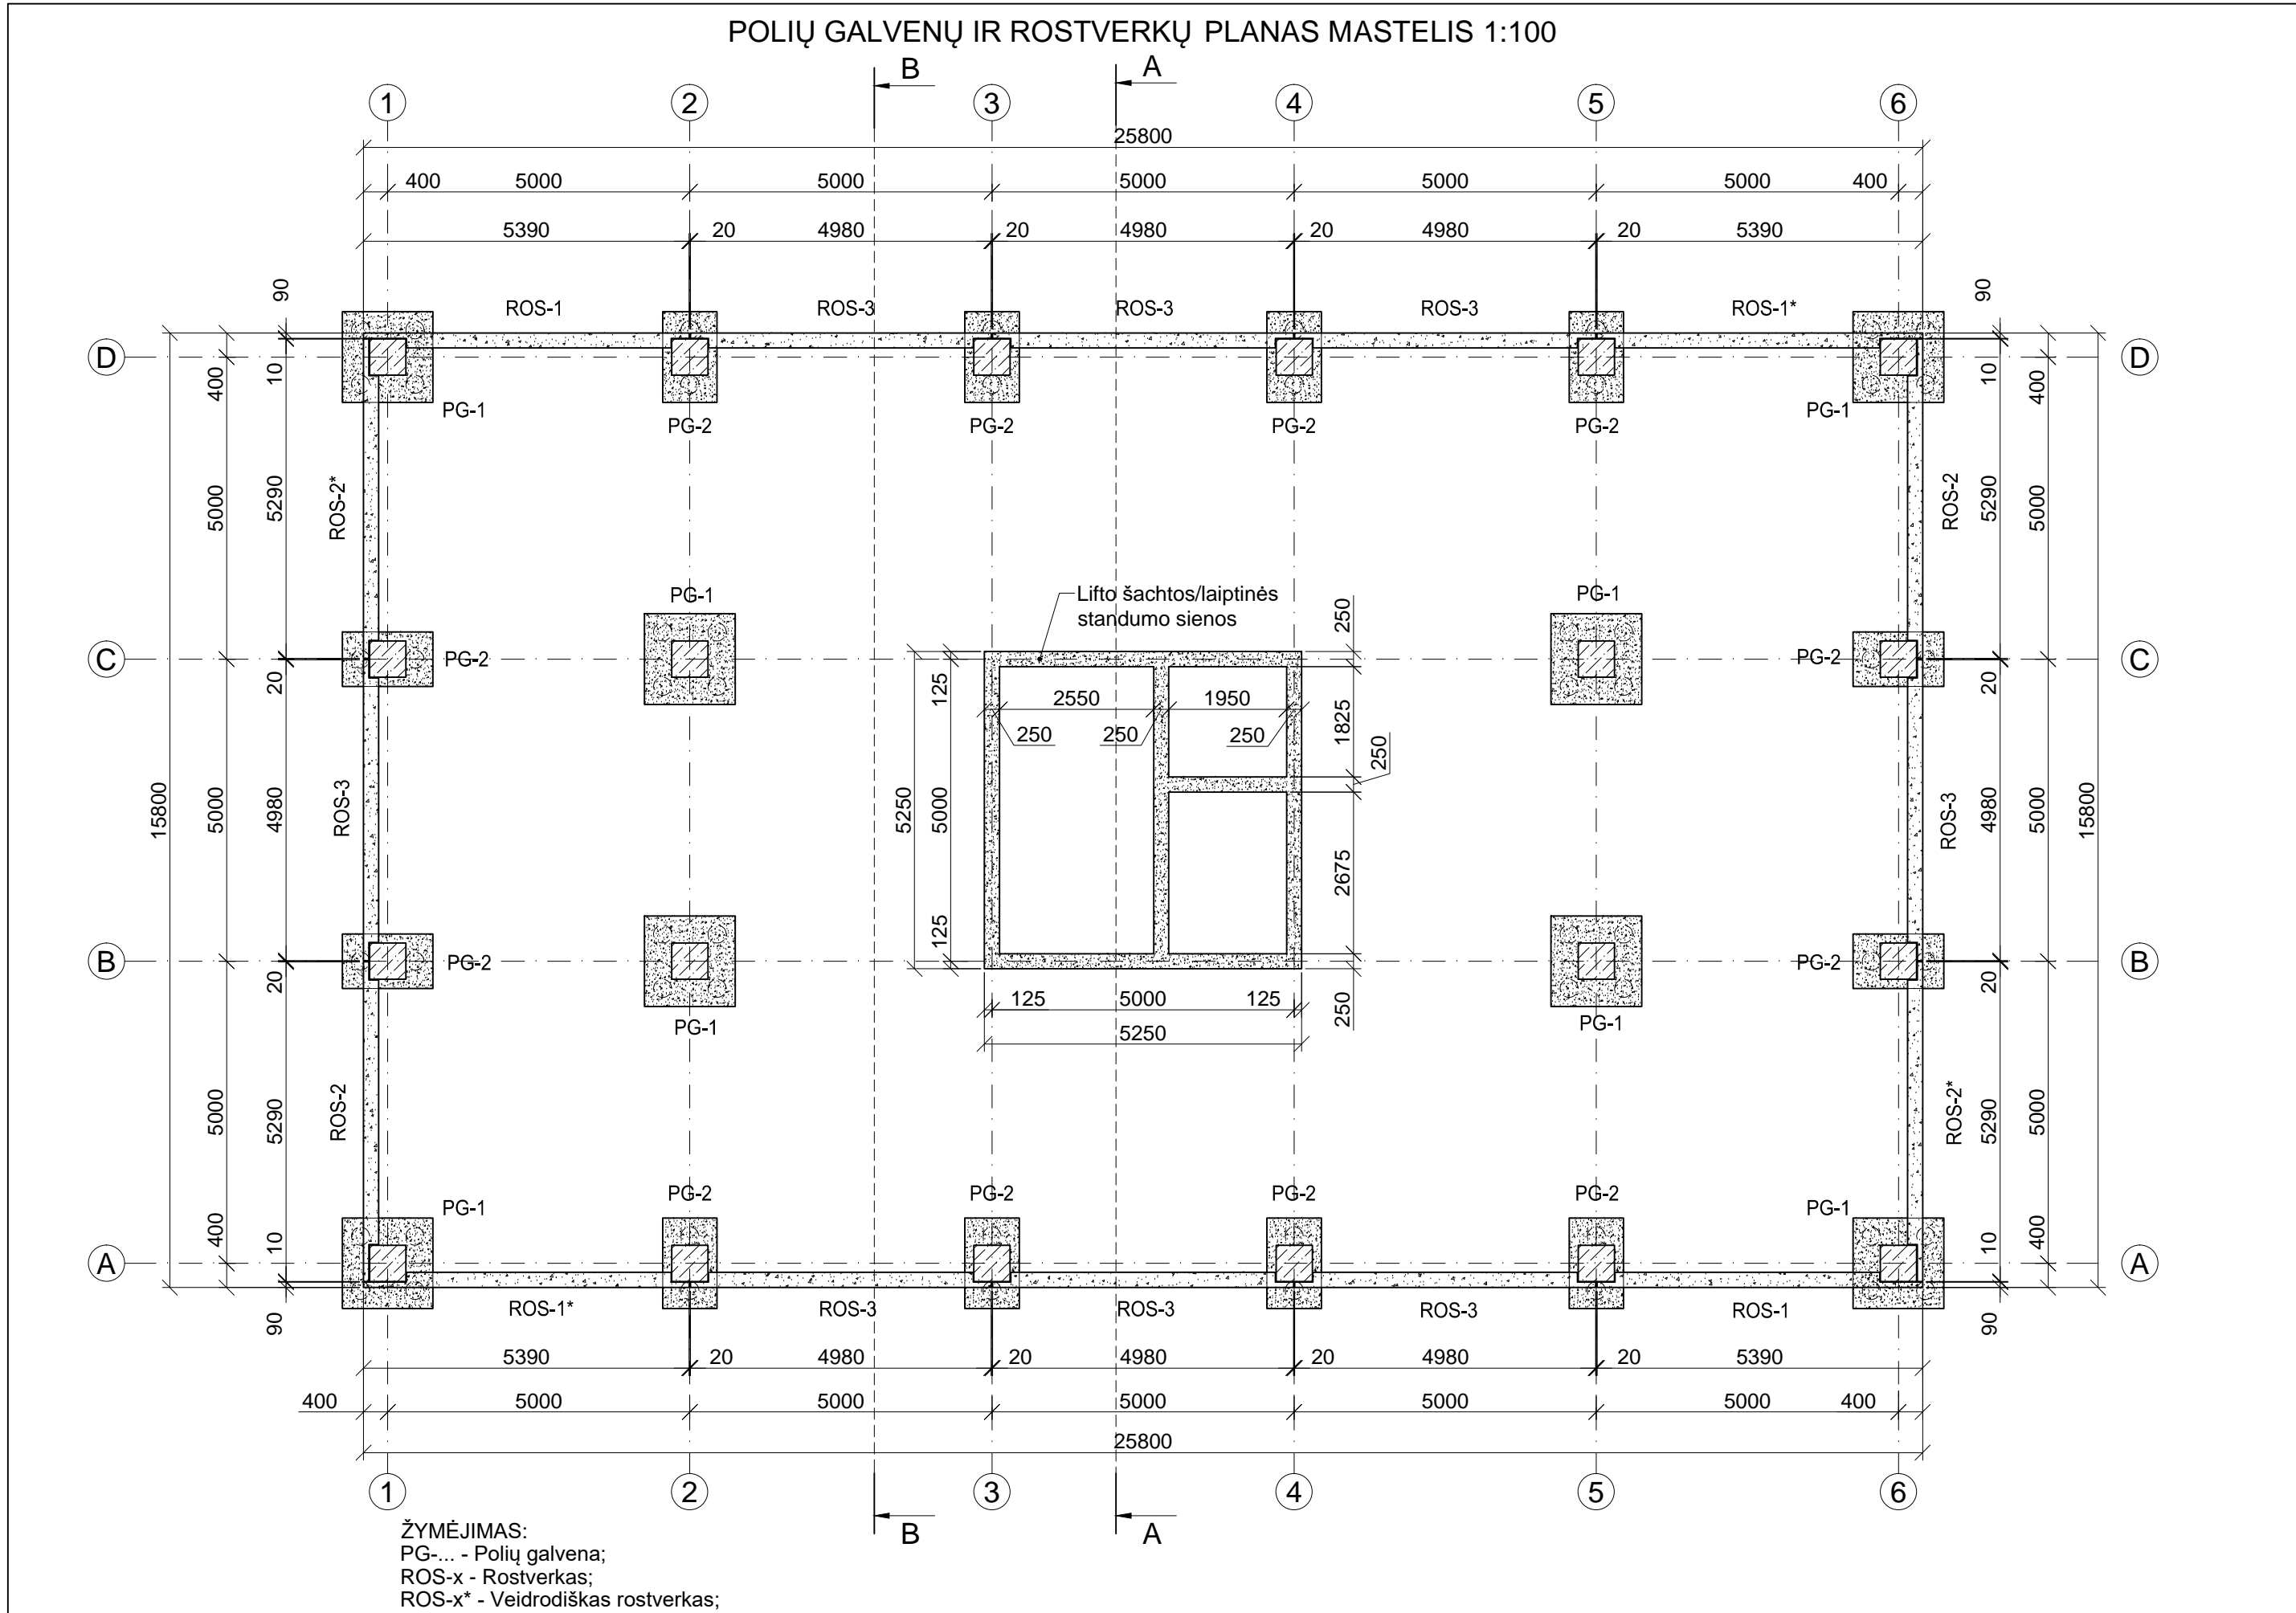

ROSTVERKŲ TVIRTINIMO PRIE POLIŲ GALVENOS MAZGAS MASTELIS 1:10

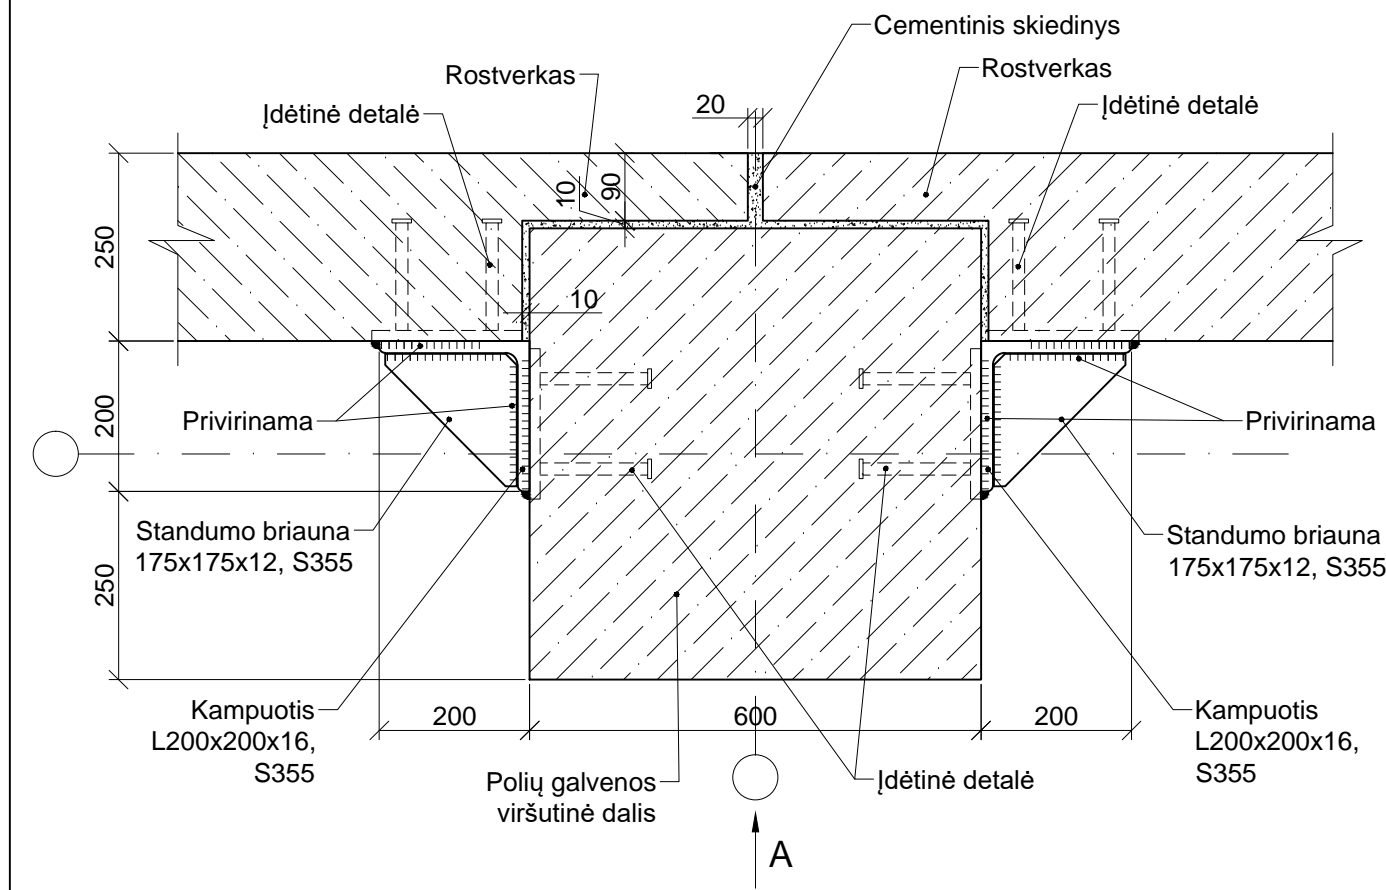

VAIZDAS A MASTELIS 1:10

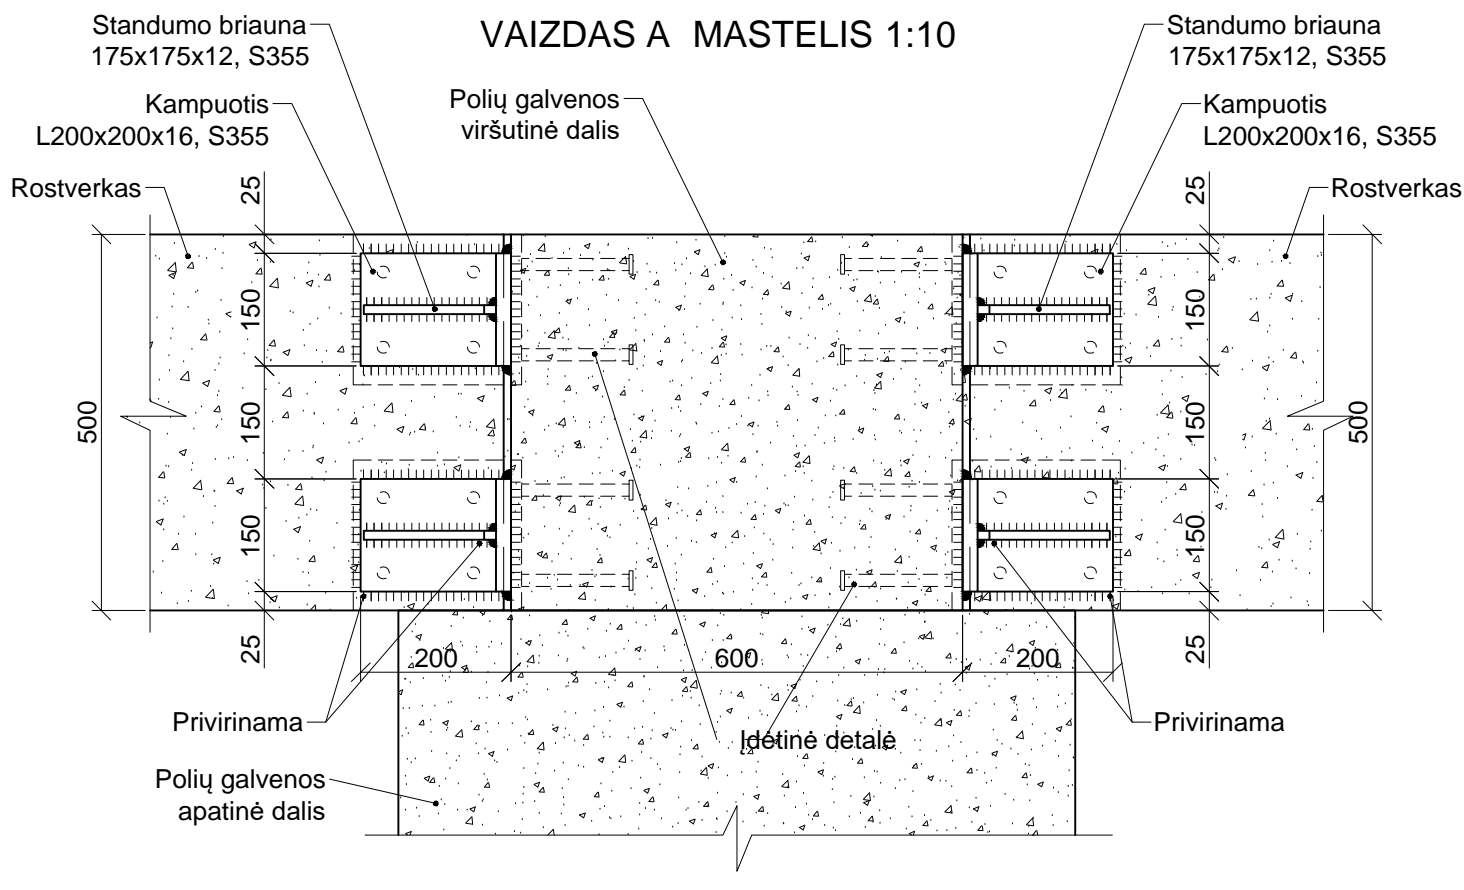

GALVENŲ PARUOŠIAMŲJŲ SLUKSNIŲ SĄNAUDŲ KIEKIŲ ŽINIARAŠTIS

| Eil. Nr.         | Pozicija | Pavadinimas                           | Žymuo | Mato vnt. | Kiekis | Sąnaudos Vien. | Iš viso | Svoris vnt., t | Papildomi duomenys |
|------------------|----------|---------------------------------------|-------|-----------|--------|----------------|---------|----------------|--------------------|
| 1                | PG-1     | Paruošiamasis sluoksnis 1700x1700x100 |       |           |        |                |         |                |                    |
| 2                |          | Betonas C25/30 XC2                    |       | m³        | 8      | 0.289          | 2.312   |                |                    |
| 3                | PG-2     | Paruošiamasis sluoksnis 1700x1100x100 |       |           |        |                |         |                |                    |
| 4                |          | Betonas C25/30 XC2                    |       | m³        | 12     | 0.187          | 2.244   |                |                    |
| Viso betono, m³: |          |                                       |       |           |        |                | 4.556   |                |                    |

MONOLITINIŲ POLIŲ GALVENŲ SĄNAUDŲ KIEKIŲ ŽINIARAŠTIS

| Eil. Nr.                          | Pozicija | Pavadinimas                   | Žymuo | Mato vnt. | Kiekis | Sąnaudos Vien. | Iš viso | Svoris vnt., t | Papildomi duomenys |
|-----------------------------------|----------|-------------------------------|-------|-----------|--------|----------------|---------|----------------|--------------------|
| 1                                 | PG-1     | Poliaus galvena 1500x1500x700 |       |           |        |                |         |                |                    |
| 2                                 |          | Betonas C25/30 XC2            |       | m³        | 8      | 1.575          | 12.600  |                |                    |
| 3                                 |          | Armatūra S500                 |       | kg        | 8      | 157.5          | 1260.0  |                |                    |
| 4                                 |          | Idėtinių detalių plienas S355 |       | kg        | 8      | 20.00          | 160.0   |                |                    |
| 5                                 | PG-2     | Poliaus galvena 1500x900x700  |       |           |        |                |         |                |                    |
| 6                                 |          | Betonas C25/30 XC2            |       | m³        | 12     | 0.945          | 11.340  |                |                    |
| 7                                 |          | Armatūra S500                 |       | kg        | 12     | 94.5           | 1134.0  |                |                    |
| 8                                 |          | Idėtinių detalių plienas S355 |       | kg        | 12     | 20.00          | 240.00  |                |                    |
| Viso betono, m³:                  |          |                               |       |           |        |                | 23.940  |                |                    |
| Viso armatūros, kg:               |          |                               |       |           |        |                | 2394.0  |                |                    |
| Viso idėtinių detalių plieno, kg: |          |                               |       |           |        |                | 400.00  |                |                    |

GELŽBETONINIŲ ROSTVERKŲ SĄNAUDŲ KIEKIŲ ŽINIARAŠTIS

| Eil. Nr.            | Pozicija | Pavadinimas             | Žymuo | Mato vnt. | Kiekis | Sąnaudos Vien. | Iš viso | Svoris vnt., t | Papildomi duomenys |
|---------------------|----------|-------------------------|-------|-----------|--------|----------------|---------|----------------|--------------------|
| 1                   | ROS-1    | Rostverkas 5390x500x250 |       |           |        |                |         |                |                    |
| 2                   |          | Betonas C25/30 XC2      |       | m³        | 2      | 0.593          | 1.186   |                |                    |
| 3                   |          | Armatūra S500           |       | kg        | 2      | 71.16          | 142.32  |                |                    |
| 4                   | ROS-1*   | Rostverkas 5390x500x250 |       |           |        |                |         |                |                    |
| 5                   |          | Betonas C25/30 XC2      |       | m³        | 2      | 0.593          | 1.186   |                |                    |
| 6                   |          | Armatūra S500           |       | kg        | 2      | 71.16          | 142.32  |                |                    |
| 7                   | ROS-2    | Rostverkas 4980x500x250 |       |           |        |                |         |                |                    |
| 8                   |          | Betonas C25/30 XC2      |       | m³        | 2      | 0.589          | 1.178   |                |                    |
| 9                   |          | Armatūra S500           |       | kg        | 2      | 70.68          | 141.36  |                |                    |
| 10                  | ROS-2*   | Rostverkas 4980x500x250 |       |           |        |                |         |                |                    |
| 11                  |          | Betonas C25/30 XC2      |       | m³        | 2      | 0.589          | 1.178   |                |                    |
| 12                  |          | Armatūra S500           |       | kg        | 2      | 70.68          | 141.36  |                |                    |
| 13                  | ROS-3    | Rostverkas 4980x500x250 |       |           |        |                |         |                |                    |
| 14                  |          | Betonas C25/30 XC2      |       | m³        | 8      | 0.575          | 4.600   |                |                    |
| 15                  |          | Armatūra S500           |       | kg        | 8      | 69.00          | 552.00  |                |                    |
| Viso betono, m³:    |          |                         |       |           |        |                | 9.328   |                |                    |
| Viso armatūros, kg: |          |                         |       |           |        |                | 1119.4  |                |                    |

GELŽBETONINIŲ ROSTVERKŲ TVIRTINIMO SĄNAUDŲ KIEKIŲ ŽINIARAŠTIS

| Eil. Nr.         | Pozicija         | Pavadinimas                  | Žymuo | Mato vnt. | Kiekis | Sąnaudos Vien. | Iš viso | Svoris vnt., t | Papildomi duomenys |
|------------------|------------------|------------------------------|-------|-----------|--------|----------------|---------|----------------|--------------------|
| 1                | ROS-1/<br>ROS-1* | Rostverkas 5390x500x250      |       |           |        |                |         |                |                    |
| 2                |                  | Idėtinės plieno detalės S355 |       | kg        | 4      | 20             | 80.0    |                |                    |
| 3                |                  | Jungimo plienas S355         |       | kg        | 4      | 40             | 160.0   |                |                    |
| 4                | ROS-2/<br>ROS-2* | Rostverkas 5390x500x250      |       |           |        |                |         |                |                    |
| 5                |                  | Idėtinės plieno detalės S355 |       | kg        | 4      | 20             | 80.0    |                |                    |
| 6                |                  | Jungimo plienas S355         |       | kg        | 4      | 40             | 160.0   |                |                    |
| 7                | ROS-3            | Rostverkas 4980x500x250      |       |           |        |                |         |                |                    |
| 8                |                  | Idėtinės plieno detalės S355 |       | kg        | 8      | 20             | 160.0   |                |                    |
| 9                |                  | Jungimo plienas S355         |       | kg        | 8      | 40             | 320.0   |                |                    |
| Viso plieno, kg: |                  |                              |       |           |        |                | 960.0   |                |                    |

PASTABOS:.

1. Pamatus gali įrengti tik kvalifikuotas rangovas.
2. Pamatai gali būti įrengiami, tik vadovaujantis darbo projektu. Už pamatų įrengimo darbų kokybę atsako rangovas.
3. Gruntas po pamatais turi būti nejudintas, vientisos struktūros.
4. Pamatų galvenos įrengiamos ant C8/10 paruošiamojo betono sluoksnio, prieš tai sutankinus esamą žvyringą smėlį, k=0.96.
5. Pamatų galvenos užpilamos žvyro/smėlio mišiniu, pastarąjį sutankinant, k=0.96.
6. Ant galvenos viršaus tepama hidroizoliacija, jei ant jos įrengiama medinė konstrukcija plienine baze.
7. Monolitinės galvenos ir rostverkai armuojami S500 stiprumo klasės armatūros tinklais ir strypais, pagal LST EN ISO 15630-1:2010.
8. Monolitinėms galvenoms ir rostverkams naudojamas C25/30, XC2, stiprumo klasės betonas, pagal LST EN 206-1:2002.

|                            |                                                                                                                                   |                                                                                                                                                                      |         |                                                                                                                       |  |       |
|----------------------------|-----------------------------------------------------------------------------------------------------------------------------------|----------------------------------------------------------------------------------------------------------------------------------------------------------------------|---------|-----------------------------------------------------------------------------------------------------------------------|--|-------|
| KVAL.<br>PATV.<br>DOK. NR. |                                                                                                                                   | UAB "Konstrukcijų pasaulis"<br>Jonavos g. 260, Kaunas<br>Įm. k.: 304690224<br>Tel. +370 (613) 98089<br>El.p.: k.pazereckas@gmail.com<br>www.konstrukciju-pasaulis.lt |         | STATINIO PROJEKTO PAVADINIMAS<br>Negyvenamasis 5 aukštų klijuotosios medienos konstrukcijų mokslo paskirties pastatas |  |       |
| 37603                      | PDV                                                                                                                               | Kęstutis Pažereckas                                                                                                                                                  | 2018 08 | DOKUMENTO PAVADINIMAS<br>Polių galvenų ir rostverkų planas                                                            |  | LAIDA |
| 37603                      | Konstr.                                                                                                                           | Kęstutis Pažereckas                                                                                                                                                  | 2018 08 |                                                                                                                       |  | O     |
|                            |                                                                                                                                   |                                                                                                                                                                      |         |                                                                                                                       |  |       |
| LT                         | UŽSAKOVAS<br>Miškų institutas, Lietuvos agrarinių ir miškų mokslų<br>centro filialas, Liepų g. 1, Girionių k., LT-53101, Kauno r. |                                                                                                                                                                      |         | BRĖŽINIO ŽYMUO<br><br>KPRS18/02-TP-SK-4.4                                                                             |  | LAPAS |
|                            |                                                                                                                                   |                                                                                                                                                                      |         |                                                                                                                       |  | LAPŲ  |
|                            |                                                                                                                                   |                                                                                                                                                                      |         |                                                                                                                       |  | 1 1   |

POLIAUS GALVENA PG-1 MASTELIS 1:25

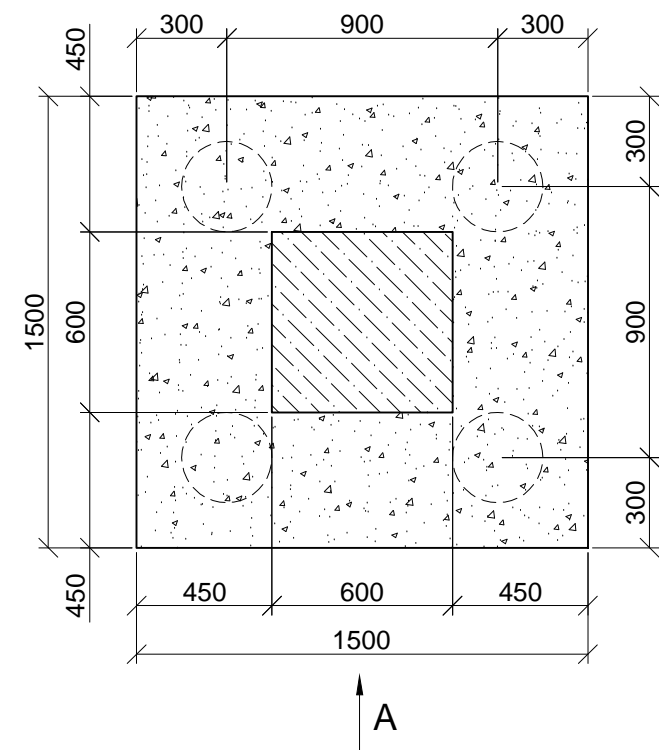

VAIZDAS A MASTELIS 1:25

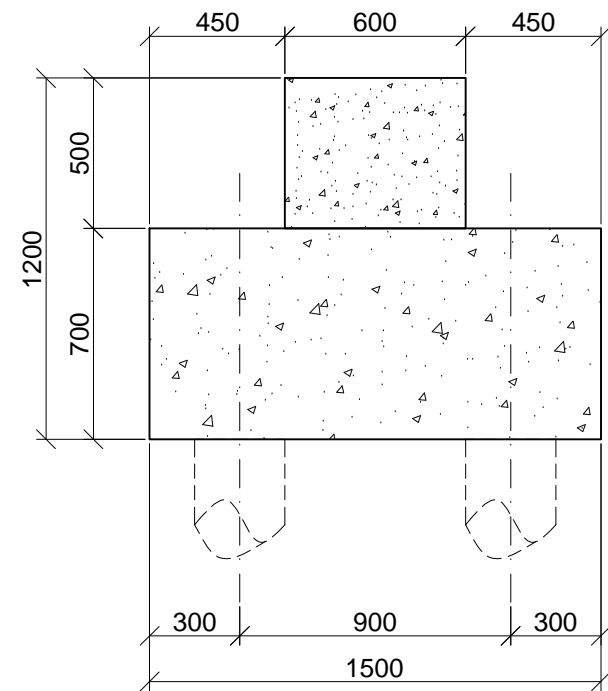

POLIAUS GALVENA PG-2 MASTELIS 1:25

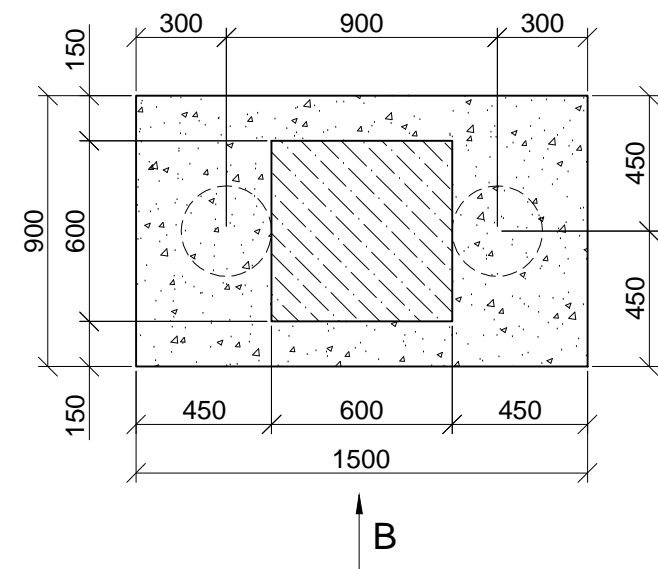

VAIZDAS B MASTELIS 1:25

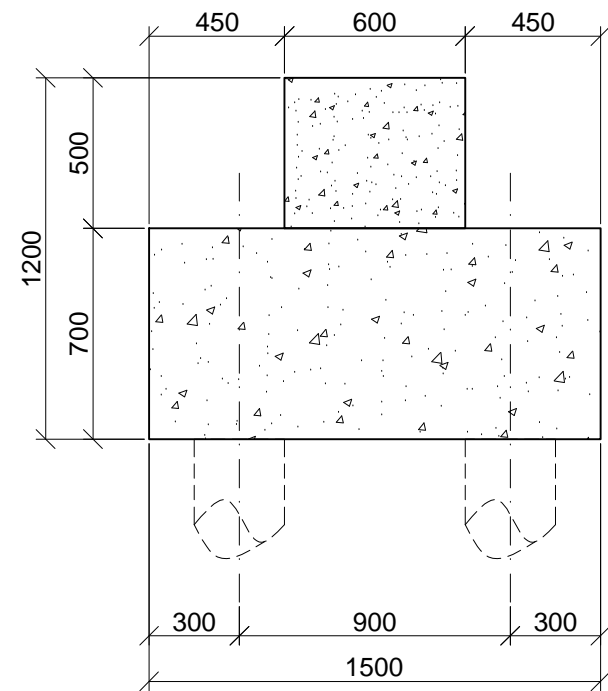

|                            |                                                                                                                                |                                                                                                                                                                      |         |                                                                                                                       |   |                                           |  |
|----------------------------|--------------------------------------------------------------------------------------------------------------------------------|----------------------------------------------------------------------------------------------------------------------------------------------------------------------|---------|-----------------------------------------------------------------------------------------------------------------------|---|-------------------------------------------|--|
| KVAL.<br>PATV.<br>DOK. NR. |                                                                                                                                | UAB "Konstrukcijų pasaulis"<br>Jonavos g. 260, Kaunas<br>Įm. k.: 304690224<br>Tel. +370 (613) 98089<br>El.p.: k.pazereckas@gmail.com<br>www.konstrukciju-pasaulis.lt |         | STATINIO PROJEKTO PAVADINIMAS<br>Negyvenamasis 5 aukštų klijuotosios medienos konstrukcijų mokslo paskirties pastatas |   |                                           |  |
|                            |                                                                                                                                |                                                                                                                                                                      |         | DOKUMENTO PAVADINIMAS<br>Polii galvenos                                                                               |   | LAIDA                                     |  |
|                            |                                                                                                                                |                                                                                                                                                                      |         |                                                                                                                       |   | O                                         |  |
|                            |                                                                                                                                |                                                                                                                                                                      |         |                                                                                                                       |   | BRĖŽINIO ŽYMUO<br><br>KPRS18/02-TP-SK-4.5 |  |
|                            |                                                                                                                                |                                                                                                                                                                      |         | 1                                                                                                                     | 1 |                                           |  |
| 37603                      | PDV                                                                                                                            | Kęstutis Pažereckas                                                                                                                                                  | 2018 08 |                                                                                                                       |   |                                           |  |
| 37603                      | Konstr.                                                                                                                        | Kęstutis Pažereckas                                                                                                                                                  | 2018 08 |                                                                                                                       |   |                                           |  |
|                            |                                                                                                                                |                                                                                                                                                                      |         |                                                                                                                       |   |                                           |  |
| LT                         | UŽSAKOVAS<br>Miškų institutas, Lietuvos agrarinių ir miškų mokslų centro filialas, Liepų g. 1, Girionių k., LT-53101, Kauno r. |                                                                                                                                                                      |         |                                                                                                                       |   |                                           |  |
|                            |                                                                                                                                |                                                                                                                                                                      |         |                                                                                                                       |   |                                           |  |

ROSTVERKAS ROS-1 MASTELIS 1:50

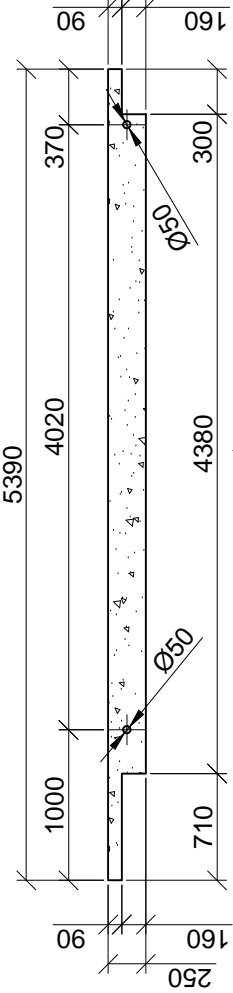

VAIZDAS A MASTELIS 1:50

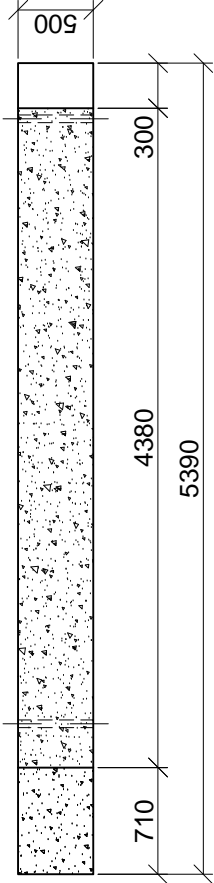

ROSTVERKAS ROS-1\* MASTELIS 1:50

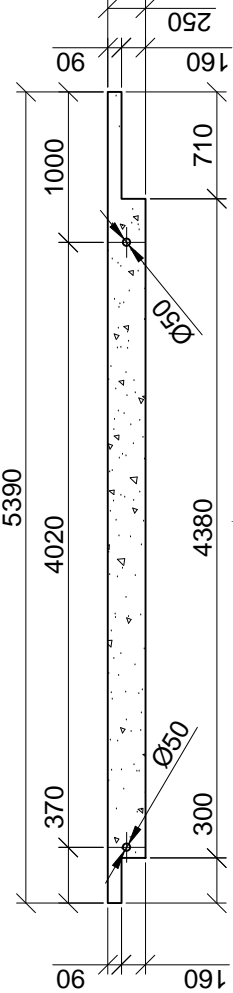

VAIZDAS B MASTELIS 1:50

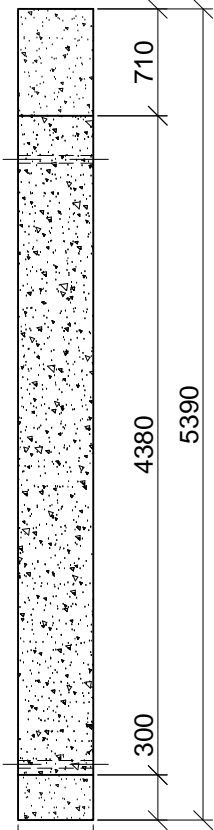

ROSTVERKAS ROS-2 MASTELIS 1:50

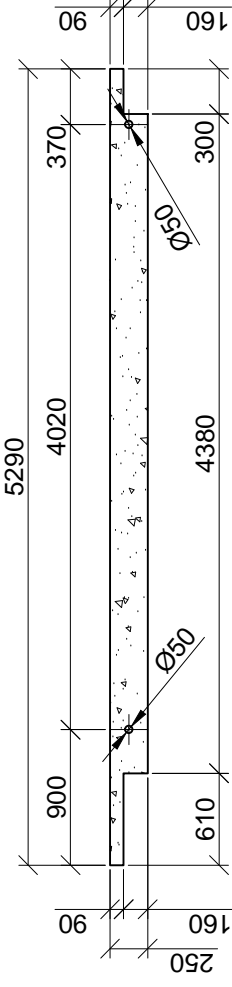

VAIZDAS C MASTELIS 1:50

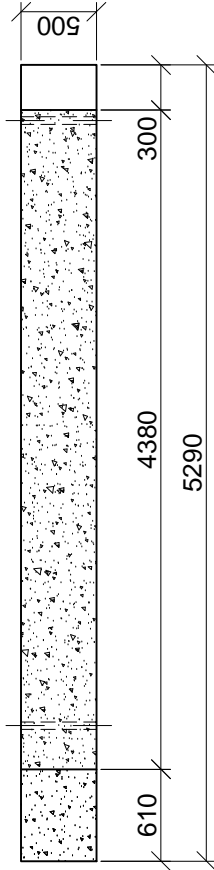

ROSTVERKAS ROS-2\* MASTELIS 1:50

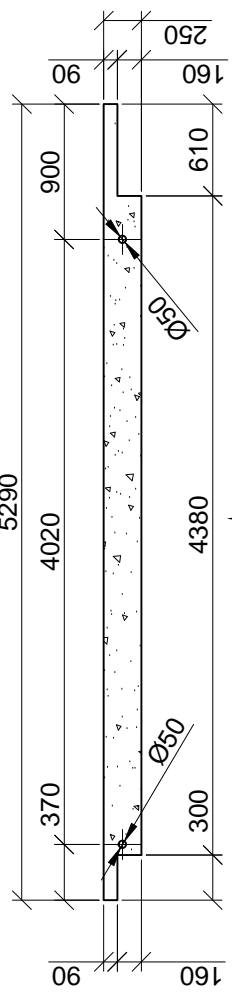

VAIZDAS D MASTELIS 1:50

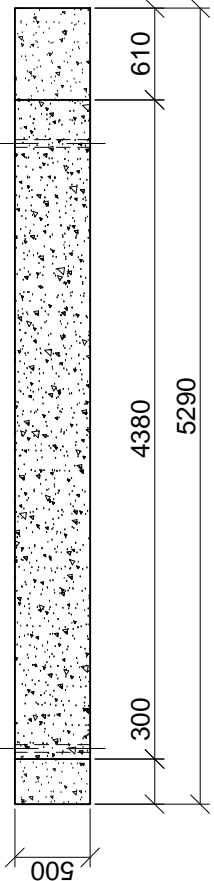

ROSTVERKAS ROS-3 MASTELIS 1:50

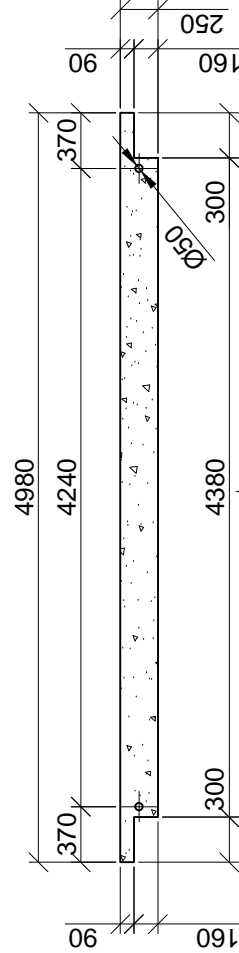

VAIZDAS E MASTELIS 1:50

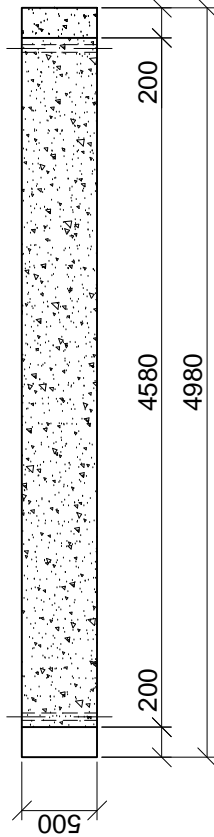

|                            |                                                                                                                                |                                                                                                                                       |         |                                                                                      |  |       |
|----------------------------|--------------------------------------------------------------------------------------------------------------------------------|---------------------------------------------------------------------------------------------------------------------------------------|---------|--------------------------------------------------------------------------------------|--|-------|
| KVAL.<br>PATV.<br>DOK. NR. |                                                                                                                                | UAB "Konstrukcijų pasaulis"                                                                                                           |         | STATINIO PROJEKTO PAVADINIMAS                                                        |  |       |
|                            |                                                                                                                                | Jonavos g. 260, Kaunas<br>Įm. k.: 304690224<br>Tel. +370 (613) 98089<br>El.p.: k.pazereckas@gmail.com<br>www.konstrukciju-pasaulis.lt |         | Negyvenamasis 5 aukštų klijuotosios medienos konstrukcijų mokslo paskirties pastatas |  |       |
|                            |                                                                                                                                |                                                                                                                                       |         |                                                                                      |  |       |
| 37603                      | PDV                                                                                                                            | Kęstutis Pažereckas                                                                                                                   | 2018 08 | DOKUMENTO PAVADINIMAS                                                                |  | LAIDA |
| 37603                      | Konstr.                                                                                                                        | Kęstutis Pažereckas                                                                                                                   | 2018 08 | Rostverkai                                                                           |  | O     |
|                            |                                                                                                                                |                                                                                                                                       |         |                                                                                      |  |       |
| LT                         | UŽSAKOVAS<br>Miškų institutas, Lietuvos agrarinių ir miškų mokslų centro filialas, Liepų g. 1, Girionių k., LT-53101, Kauno r. |                                                                                                                                       |         | BRĖŽINIO ŽYMUO                                                                       |  | LAPAS |
|                            |                                                                                                                                |                                                                                                                                       |         | KPRS18/02-TP-SK-4.6                                                                  |  | LAPŲ  |
|                            |                                                                                                                                |                                                                                                                                       |         | 1                                                                                    |  | 1     |



PIRMO AUKŠTO PLANAS MASTELIS 1:100

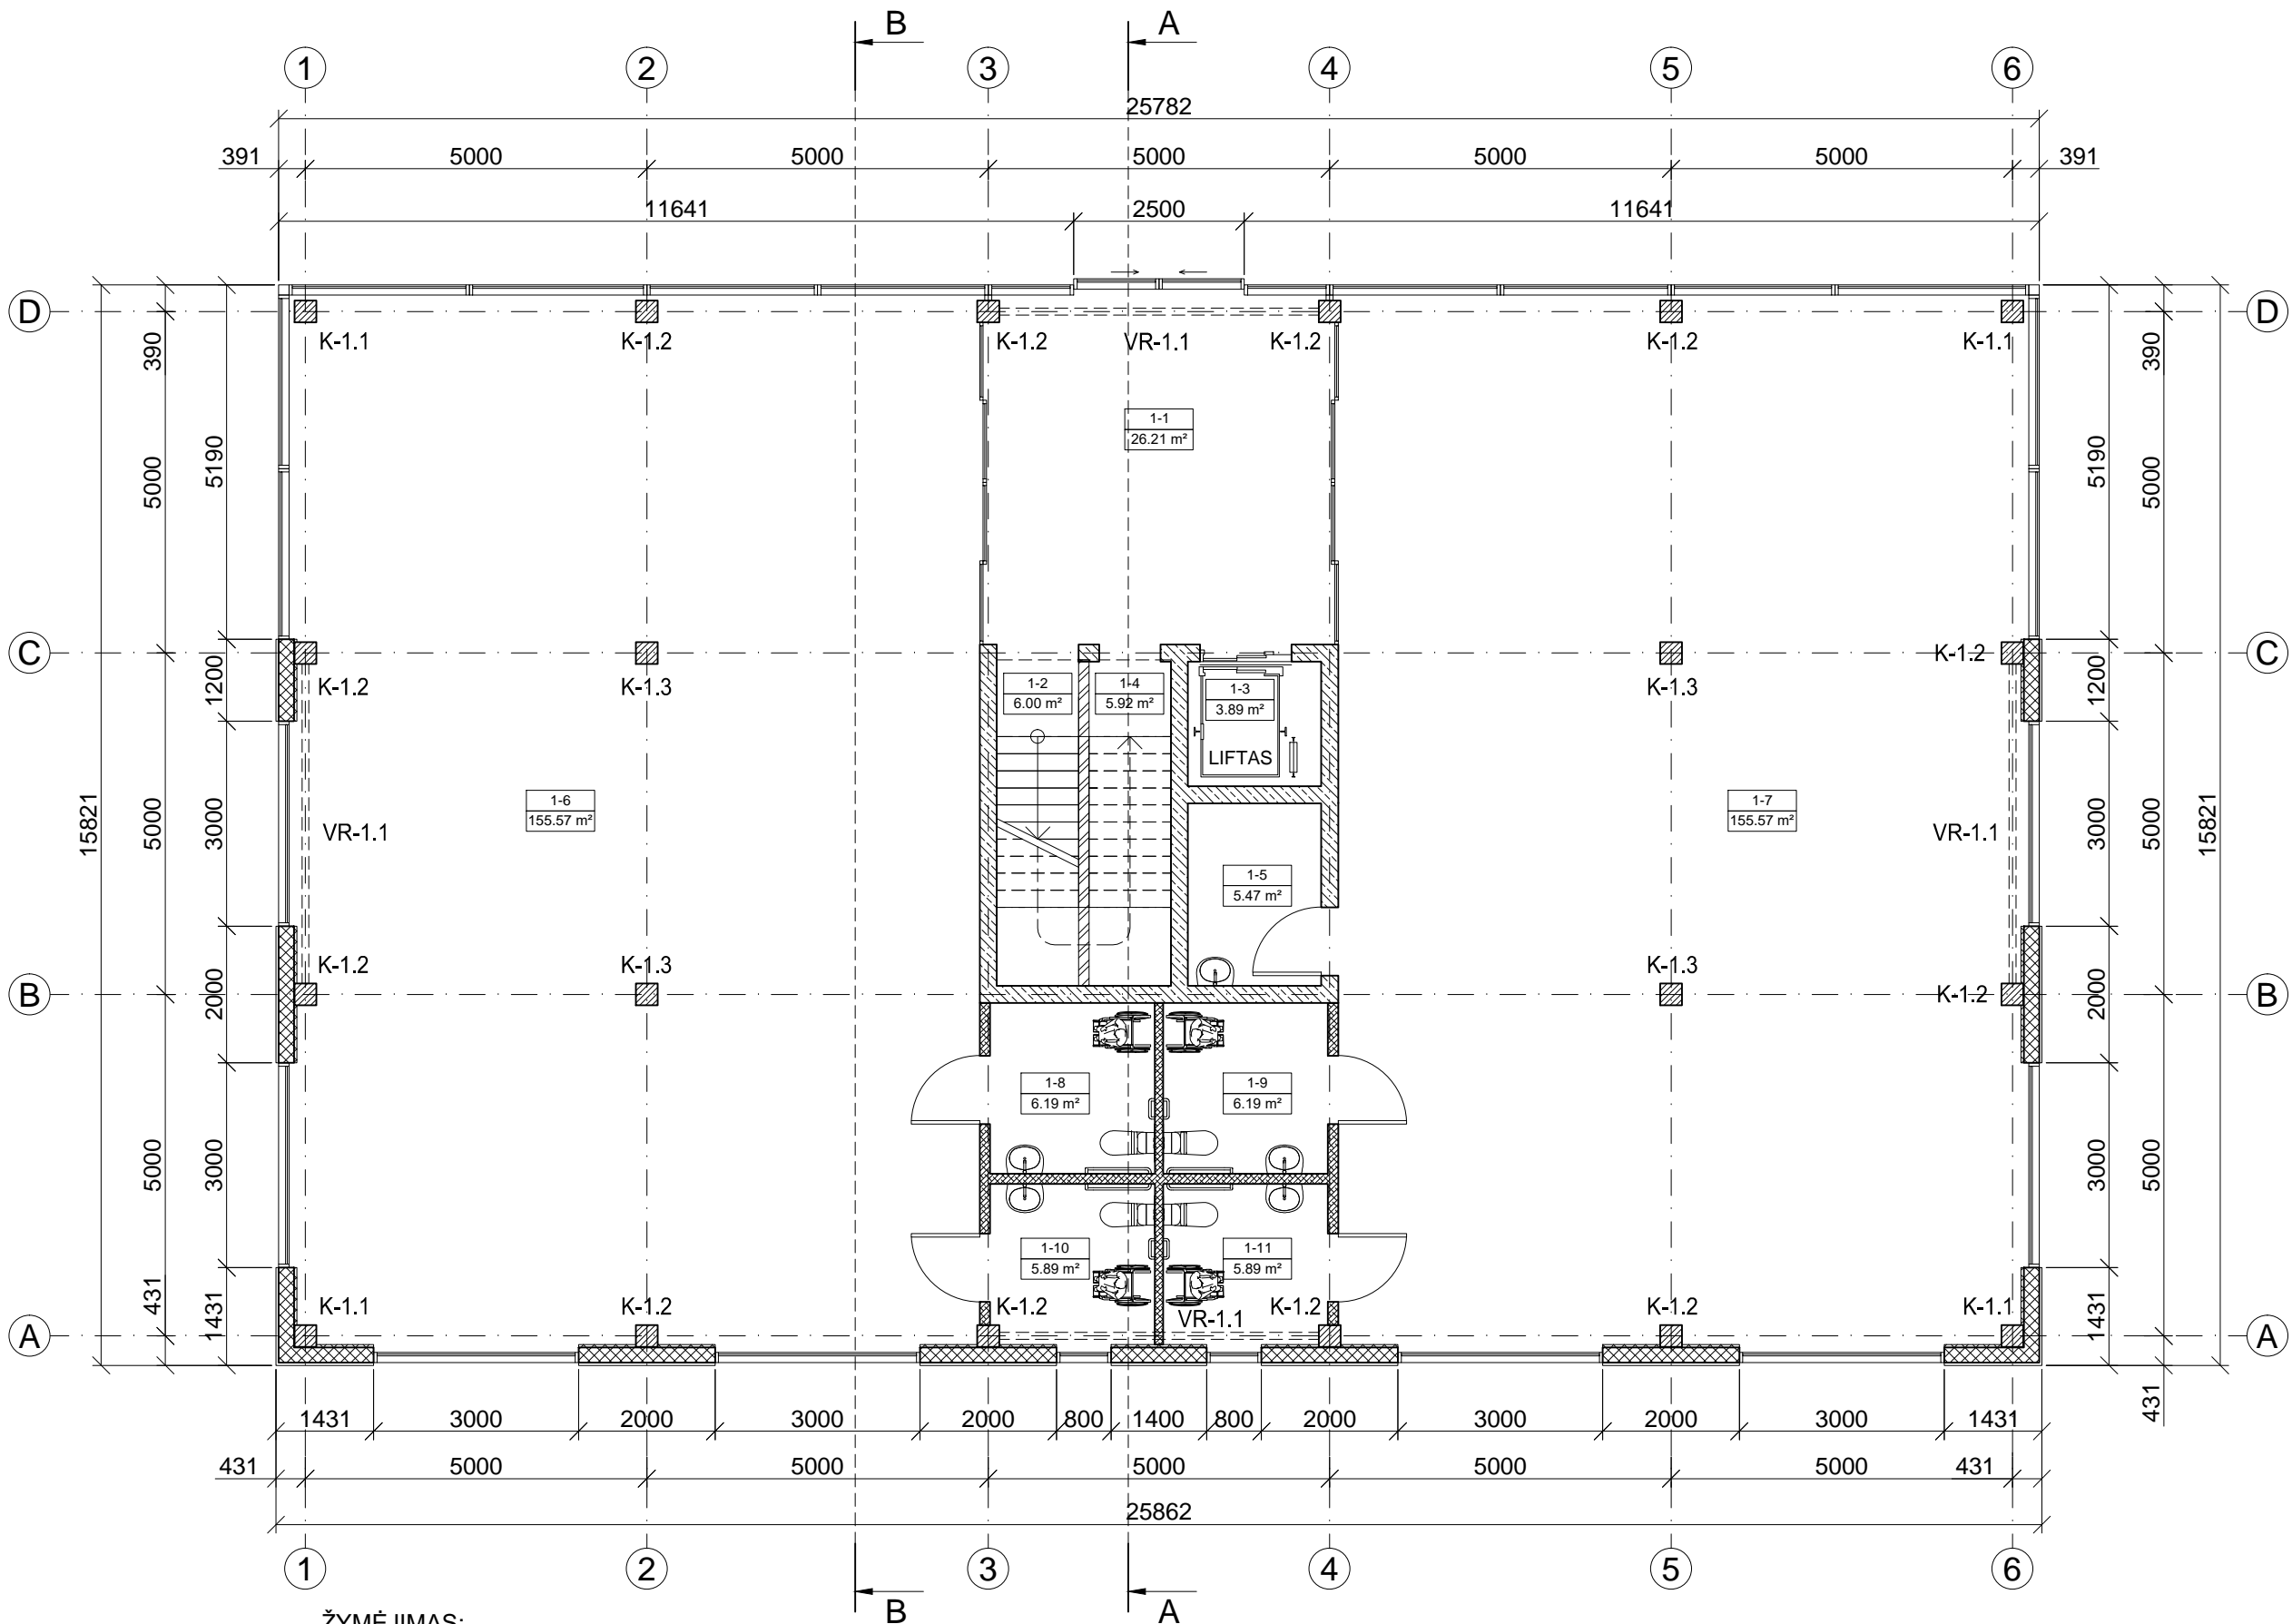

ŽYMĖJIMAS:  
K-... - Medinė kolona;  
VR-... - Plieniniai vertikalieji ryšiai;

| Patalpų eksplikacija |                  |            |
|----------------------|------------------|------------|
| Numeris              | Patalpa          | Plotas     |
| 1-1                  | Fojė             | 26.21 m²   |
| 1-2                  | Laiptinė         | 6.00 m²    |
| 1-3                  | Lifto šachta     | 3.89 m²    |
| 1-4                  | Tech. patalpa    | 5.92 m²    |
| 1-5                  | Tech. patalpa    | 5.47 m²    |
| 1-6                  | Įstaigų patalpos | 155.57 m²  |
| 1-7                  | Įstaigų patalpos | 155.57 m²  |
| 1-8                  | San. mazgas      | 6.19 m²    |
| 1-9                  | San. mazgas      | 6.19 m²    |
| 1-10                 | San. mazgas      | 5.89 m²    |
| 1-11                 | San. mazgas      | 5.89 m²    |
| Viso aukšte:         |                  | 382.79 m²  |
| Viso pastate:        |                  | 1912.71 m² |

- PASTABOS:
- Medinių kolonų montavimui ant pamato bei tarpusavio sujungimams naudojamos įdėtinės plieninės kolonų detalės ir inkariniai varžtai.
  - Medinių kolonų įdėtinės detalės projektuojamos darbo projekto stadijoje.
  - Kolonoms naudojama GL28h stiprumo klasės klijuotoji sluoksninė mediena.
  - Medinių kolonų atsparumas ugniai R45 min užtikrinamas skaičiavimais, papildomu apsauginiu medienos sluoksniu.
  - Monolitinėms laiptinių ir lifto šachtų standumo sienoms naudojamas C30/37 X0 klasės betonas, pagal LST EN 206-1:2002.
  - Monolitiniai elementai armuojami S500 stiprumo klasės armatūros tinklais ir/ar strypynais, pagal LST EN ISO 15630-1:2010.
  - Metalinėms konstrukcijoms ir elementams naudojamas S355 stiprumo klasės plienas.
  - Suvinimo jungčių briaunų paruošimas turi būti atliekamas pagal EN ISO 9692-1.
  - Metaliniai elementai tarpusavyje suvinami, siūlės aukštis 1,2-kf - plonesniojo iš jungiamųjų elementų storis (jei nenurodyta kitaip), pagal LST EN ISO 9692-1:2004.
  - Konstrukcijų suvinimui naudojamos suvinimo medžiagos užtikrinančios suvinimo siūlės skaičiuojamuosius stiprius ne mažesnius nei suvinamo metalo.
  - Metaliniai paviršiai gruntuojami ir dažomi, pagal LST EN ISO 12944-2:2000.
  - Skylės varžtams daromos 2 mm didesnės nei varžto diameteras (jei brėžinyje nenurodyta kitaip).
  - Darbai vykdomi pagal darbo projektą.

MEDINIŲ PIRMO AUKŠTO KOLONŲ SĄNAUDŲ KIEKIŲ ŽINIARAŠTIS

| Eil. Nr.                         | Pozicija | Pavadinimas                  | Žymuo | Mato vnt. | Kiekis | Sąnaudos |         | Svoris vnt., t | Papildomi duomenys |
|----------------------------------|----------|------------------------------|-------|-----------|--------|----------|---------|----------------|--------------------|
|                                  |          |                              |       |           |        | Vien.    | Iš viso |                |                    |
| 1                                | K-1.1    | Kolona 320x320x3600          |       |           |        |          |         |                |                    |
| 2                                |          | Klijuota mediena GL28h       |       | m³        | 4      | 0.369    | 1.476   |                |                    |
| 3                                |          | Jungimo detalių plienas S355 |       | kg        | 4      | 130.0    | 520.0   |                |                    |
| 4                                | K-1.2    | Kolona 320x320x3600          |       |           |        |          |         |                |                    |
| 5                                |          | Klijuota mediena GL28h       |       | m³        | 12     | 0.369    | 4.428   |                |                    |
| 6                                |          | Jungimo detalių plienas S355 |       | kg        | 12     | 140.0    | 1680.0  |                |                    |
| 7                                | K-1.3    | Kolona 320x320x3600          |       |           |        |          |         |                |                    |
| 8                                |          | Klijuota mediena GL28h       |       | m³        | 4      | 0.369    | 1.476   |                |                    |
| 9                                |          | Jungimo detalių plienas S355 |       | kg        | 4      | 150.00   | 600.00  |                |                    |
| Viso klijuotos medienos, m³:     |          |                              |       |           |        |          | 7.380   |                |                    |
| Viso jungimo detalių plieno, kg: |          |                              |       |           |        |          | 2800.0  |                |                    |

PIRMO AUKŠTO PLIENINIŲ RYŠIŲ SĄNAUDŲ KIEKIŲ ŽINIARAŠTIS

| Eil. Nr.         | Pozicija | Pavadinimas                  | Žymuo | Mato vnt. | Kiekis | Sąnaudos |         | Svoris vnt., t | Papildomi duomenys |
|------------------|----------|------------------------------|-------|-----------|--------|----------|---------|----------------|--------------------|
|                  |          |                              |       |           |        | Vien.    | Iš viso |                |                    |
| 1                | VR-1.1   | Plieniniai vertikalūs ryšiai |       | vnt.      | 4      | 196.90   | 787.60  |                |                    |
| 2                |          | Ø101.6x6, S355, L=4700       |       | kg        | 1      | 66.98    | 66.98   |                |                    |
| 3                |          | Ø88.9x5, S355, L=2573        |       | kg        | 2      | 26.50    | 53.00   |                |                    |
| 4                |          | Ø88.9x5, S355, L=1100        |       | kg        | 2      | 11.33    | 22.66   |                |                    |
| 5                |          | Ø88.9x5, S355, L=1012        |       | kg        | 2      | 10.42    | 20.84   |                |                    |
| 6                |          | -385x100x8, S355             |       | kg        | 4      | 1.75     | 7.00    |                |                    |
| 7                |          | -210x120x8, S355             |       | kg        | 2      | 1.58     | 3.16    |                |                    |
| 8                |          | -355x100x8, S355             |       | kg        | 4      | 1.55     | 6.20    |                |                    |
| 9                |          | -240x120x8, S355             |       | kg        | 2      | 1.81     | 3.62    |                |                    |
| 10               |          | -220x120x8, S355             |       | kg        | 4      | 1.66     | 6.64    |                |                    |
| 11               |          | -120x120x8, S355             |       | kg        | 4      | 0.91     | 3.64    |                |                    |
| 12               |          | -270x85x8, S355              |       | kg        | 4      | 0.79     | 3.16    |                |                    |
| Viso plieno, kg: |          |                              |       |           |        |          | 787.60  |                |                    |

MONOLITINIŲ LAIPTINIŲ/LIFTO ŠACHTŲ/STANDUMO SIENŲ SĄNAUDŲ KIEKIŲ ŽINIARAŠTIS

| Eil. Nr.                         | Pozicija | Pavadinimas                     | Žymuo | Mato vnt. | Kiekis | Sąnaudos |         | Svoris vnt., t | Papildomi duomenys |
|----------------------------------|----------|---------------------------------|-------|-----------|--------|----------|---------|----------------|--------------------|
|                                  |          |                                 |       |           |        | Vien.    | Iš viso |                |                    |
| 1                                |          | Laiptinės/lifto standumo sienos |       |           |        |          |         |                |                    |
| 2                                |          | Betonas C30/37 X0               |       | m³        | 1      | -        | 104.00  |                |                    |
| 3                                |          | Armatūra S500                   |       | kg        | 1      | -        | 10400   |                |                    |
| 4                                |          | Įdėtinų detalių plienas S355    |       | kg        | 1      | -        | 1000.0  |                |                    |
| 5                                |          | Standumo bloko perdangos        |       |           |        |          |         |                |                    |
| 6                                |          | Betonas C30/37 X0               |       | m³        | 1      | -        | 7.480   |                |                    |
| 7                                |          | Armatūra S500                   |       | kg        | 1      | -        | 748.0   |                |                    |
| 8                                |          | Laiptai ir laiptų aikštelės     |       |           |        |          |         |                |                    |
| 9                                |          | Betonas C30/37 X0               |       | m³        | 1      | -        | 10.400  |                |                    |
| 10                               |          | Armatūra S500                   |       | kg        | 1      | -        | 1040.0  |                |                    |
| Viso betono, m³:                 |          |                                 |       |           |        |          | 121.88  |                |                    |
| Viso armatūros, kg:              |          |                                 |       |           |        |          | 12188   |                |                    |
| Viso įdėtinų detalių plieno, kg: |          |                                 |       |           |        |          | 1000.0  |                |                    |

|                            |                                                                                                                   |                                                                                                                                       |         |                                                                                      |   |       |
|----------------------------|-------------------------------------------------------------------------------------------------------------------|---------------------------------------------------------------------------------------------------------------------------------------|---------|--------------------------------------------------------------------------------------|---|-------|
| KVAL.<br>PATV.<br>DOK. NR. |                              | UAB "Konstrukcijų pasaulis"                                                                                                           |         | STATINIO PROJEKTO PAVADINIMAS                                                        |   |       |
|                            |                                                                                                                   | Jonavos g. 260, Kaunas<br>Įm. k.: 304690224<br>Tel. +370 (613) 98089<br>El.p.: k.pazereckas@gmail.com<br>www.konstrukciju-pasaulis.lt |         | Negyvenamasis 5 aukštų klijuotosios medienos konstrukcijų mokslo paskirties pastatas |   |       |
|                            |                                                                                                                   |                                                                                                                                       |         |                                                                                      |   |       |
| 37603                      | PDV                                                                                                               | Kęstutis Pažereckas                                                                                                                   | 2018 08 | DOKUMENTO PAVADINIMAS                                                                |   | LAIDA |
| 37603                      | Konstr.                                                                                                           | Kęstutis Pažereckas                                                                                                                   | 2018 08 | Pirmo aukšto planas                                                                  |   | O     |
|                            |                                                                                                                   |                                                                                                                                       |         |                                                                                      |   |       |
| LT                         | UŽSAKOVAS                                                                                                         |                                                                                                                                       |         | BRĖŽINIO ŽYMUO                                                                       |   | LAPAS |
|                            | Miškų institutas, Lietuvos agrarinių ir miškų mokslų centro filialas, Liepų g. 1, Girionių k., LT-53101, Kauno r. |                                                                                                                                       |         | KPRS18/02-TP-SK-4.7                                                                  |   | LAPŲ  |
|                            |                                                                                                                   |                                                                                                                                       |         |                                                                                      |   | 1     |
|                            |                                                                                                                   |                                                                                                                                       |         |                                                                                      | 1 |       |

KOLONOS TVIRTINIMO SU PAMATU IR RYŠIU  
MAZGAS MASTELIS 1:10

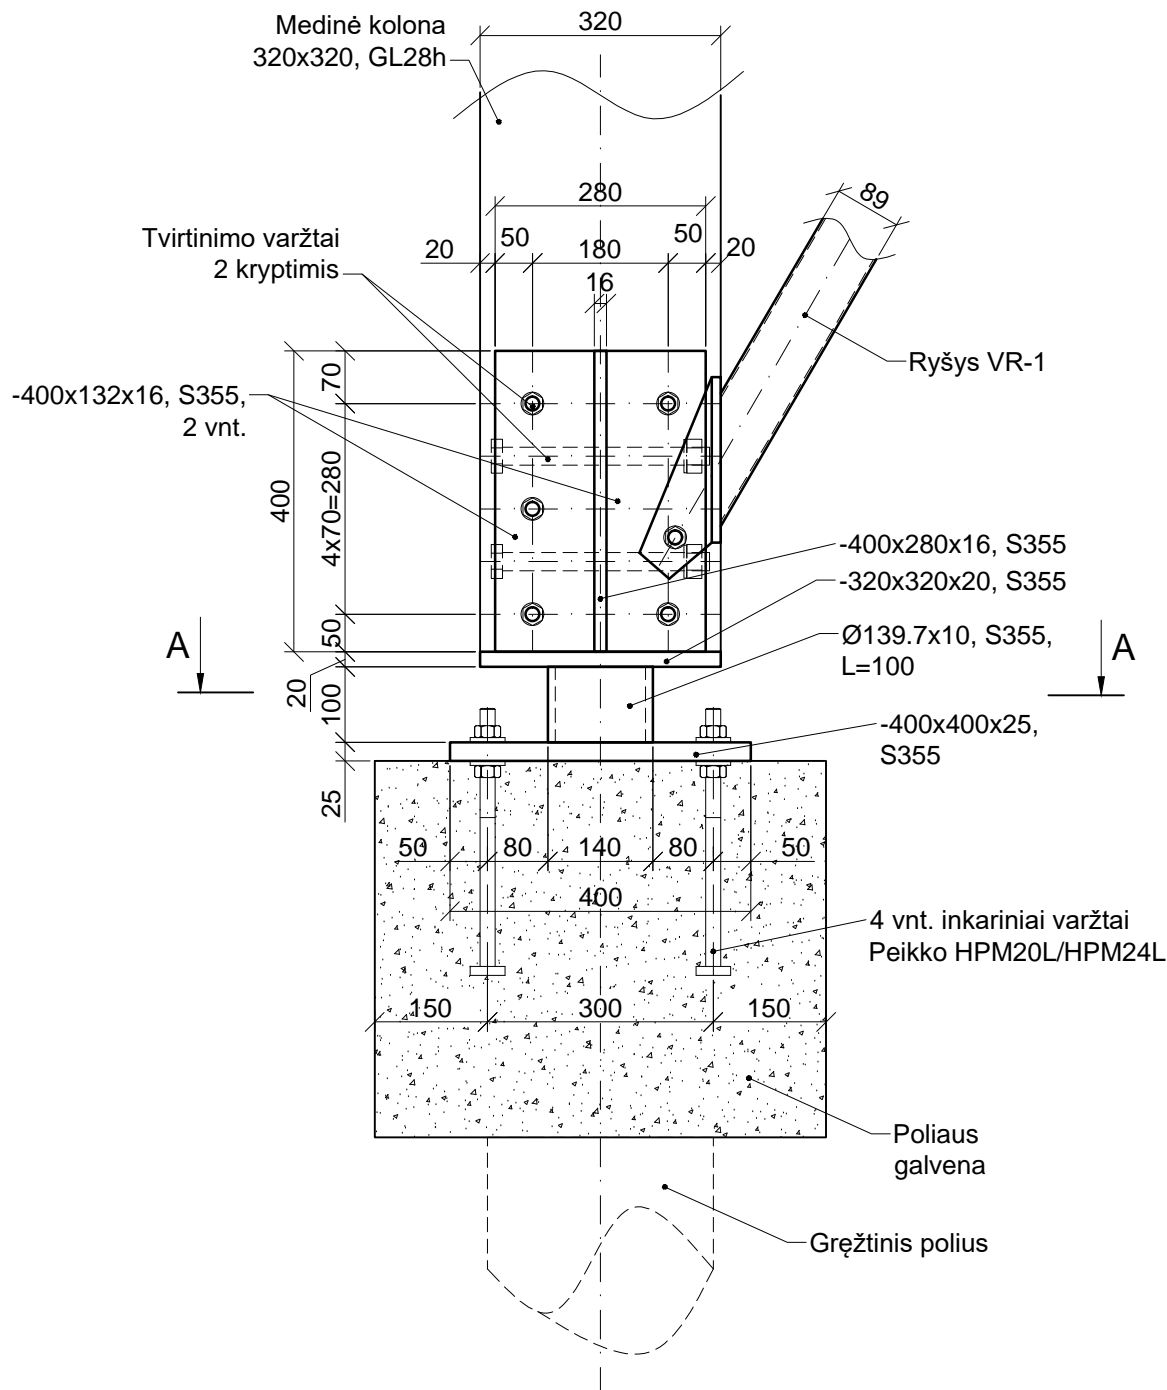

PJŪVIS A-A MASTELIS 1:10

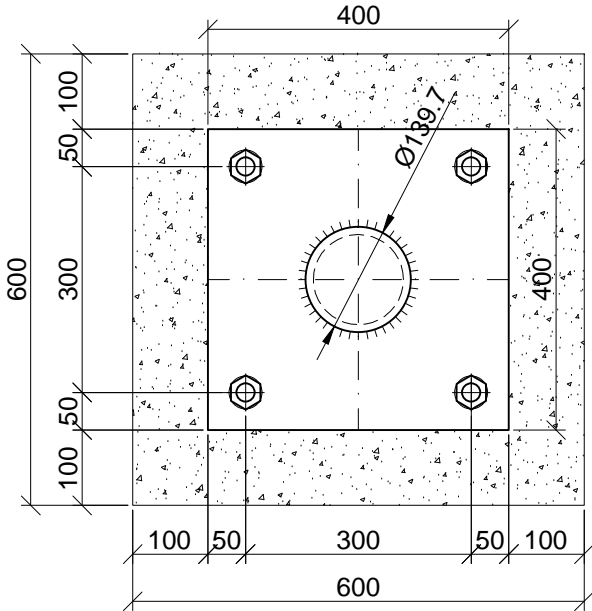

|                            |                                                                                                                                |                                                                                                                                                                             |                                       |                                                                                                                       |       |       |
|----------------------------|--------------------------------------------------------------------------------------------------------------------------------|-----------------------------------------------------------------------------------------------------------------------------------------------------------------------------|---------------------------------------|-----------------------------------------------------------------------------------------------------------------------|-------|-------|
| KVAL.<br>PATV.<br>DOK. NR. |                                                                                                                                | <b>UAB "Konstrukcijų pasaulis"</b><br>Jonavos g. 260, Kaunas<br>Įm. k.: 304690224<br>Tel. +370 (613) 98089<br>El.p.: k.pazereckas@gmail.com<br>www.konstrukciju-pasaulis.lt |                                       | STATINIO PROJEKTO PAVADINIMAS<br>Negyvenamasis 5 aukštų klijuotosios medienos konstrukcijų mokslo paskirties pastatas |       |       |
|                            |                                                                                                                                |                                                                                                                                                                             |                                       | DOKUMENTO PAVADINIMAS<br>Kolonos tvirtinimo su pamatu ir ryšiu mazgas                                                 |       | LAIDA |
|                            |                                                                                                                                |                                                                                                                                                                             |                                       |                                                                                                                       |       | O     |
| LT                         | UŽSAKOVAS<br>Miškų institutas, Lietuvos agrarinių ir miškų mokslų centro filialas, Liepų g. 1, Girionių k., LT-53101, Kauno r. |                                                                                                                                                                             | BRĖŽINIO ŽYMUO<br>KPRS18/02-TP-SK-4.8 |                                                                                                                       | LAPAS | LAPŲ  |
|                            |                                                                                                                                |                                                                                                                                                                             |                                       |                                                                                                                       | 1     | 1     |



PIRMO / ANTRO / TREČIO / KETVIRTO AUKŠTŲ PERDANGŲ SIJŲ PLANAS MASTELIS 1:100

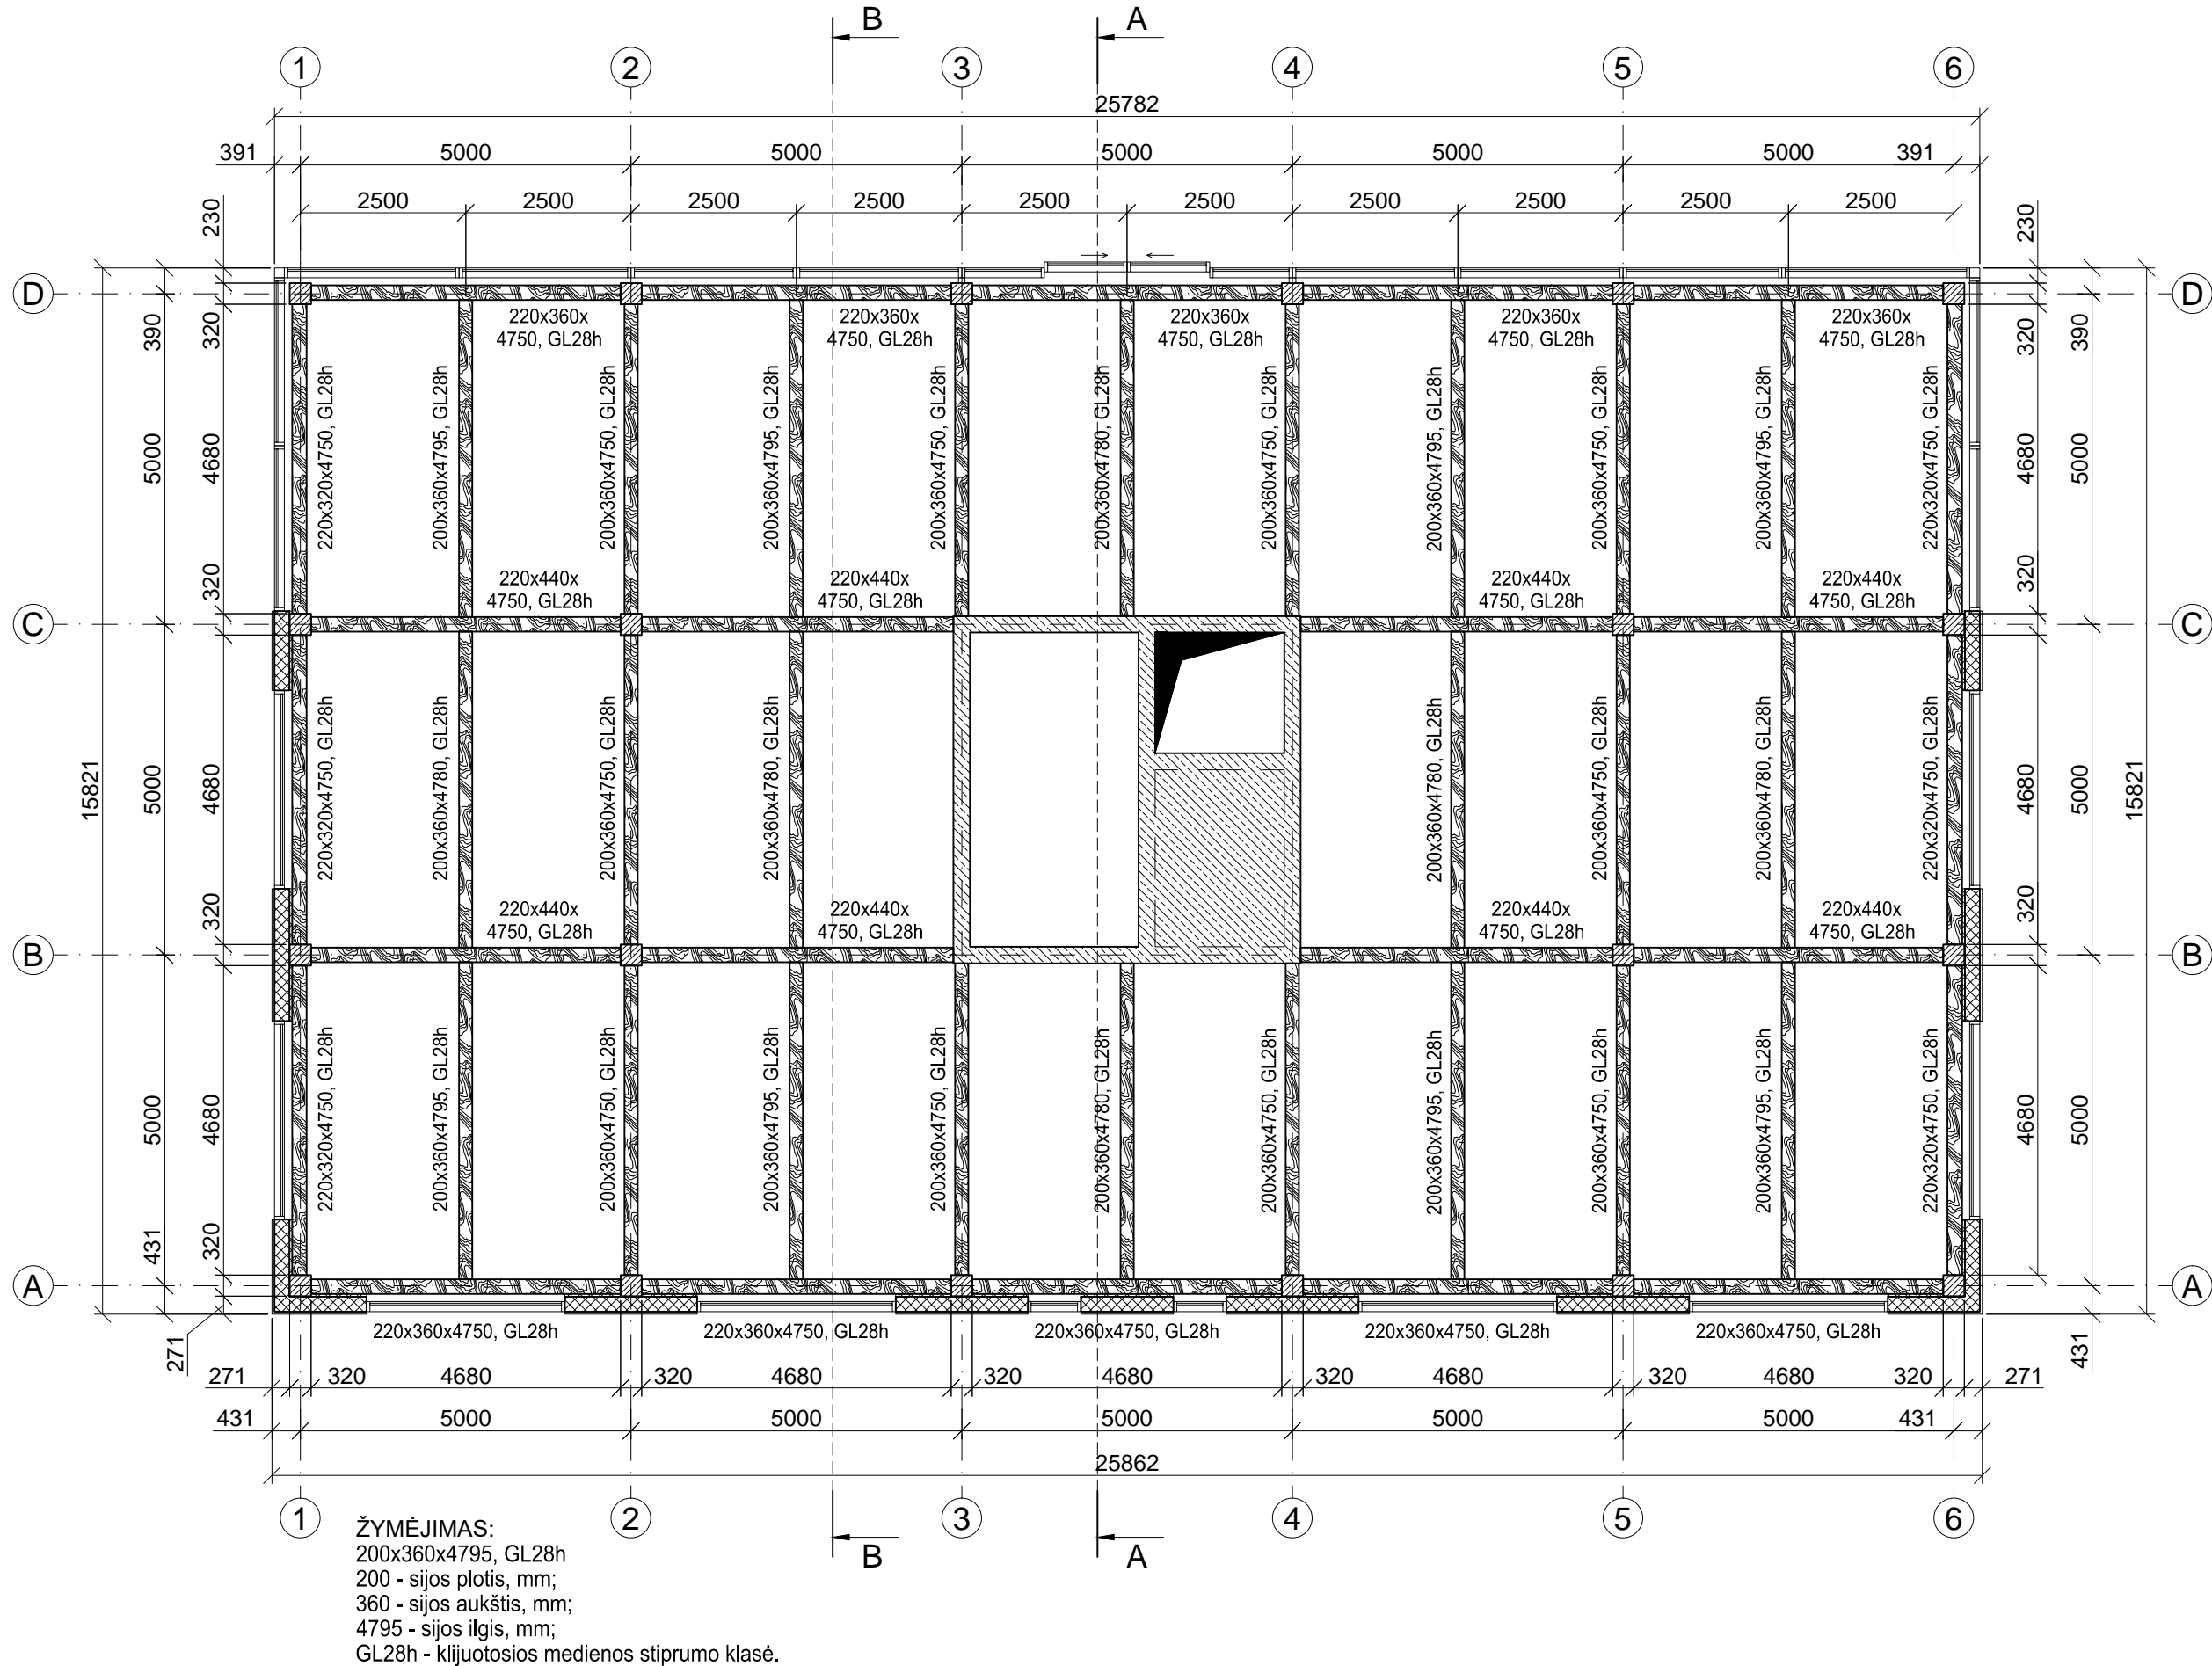

ŽYMĖJIMAS:  
200x360x4795, GL28h  
200 - sijos plotis, mm;  
360 - sijos aukštis, mm;  
4795 - sijos ilgis, mm;  
GL28h - klijuotosios medienos stiprumo klasė.

PJŪVIS B-B MASTELIS 1:10

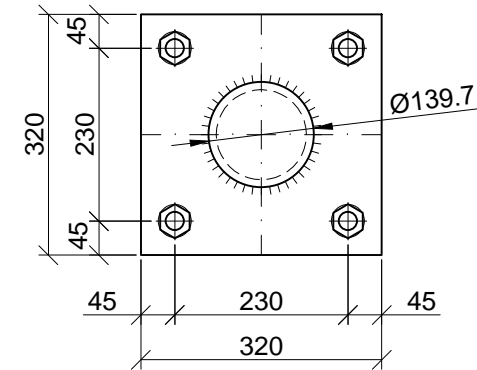

- PASTABOS:
- Surenkamų medinių sijų montavimui ant kolonų naudojamos paslėptos plieninės jungtys ir į sijas bei kolonas įleidžiami varžtai.
  - Surenkamų medinių sijų įdėtinės detalės projektuojamos darbo projekto stadijoje.
  - Medinėms sijoms naudojama GL28h stiprumo klasės klijuotoji sluoksninė mediena.
  - Medinių sijų atsparumas ugniai R45 min užtikrinamas skaičiavimais, papildomu apsauginiu medienos sluoksniu.
  - Monolitinėms laiptinių ir lifto šachtų standumo sienoms naudojamas C30/37 X0 klasės betonas, pagal LST EN 206-1:2002.
  - Monolitiniai elementai armuojami S500 stiprumo klasės armatūros tinklais ir/ar strypynais, pagal LST EN ISO 15630-1:2010.
  - Metalinėms konstrukcijoms ir elementams naudojamas S355 stiprumo klasės plienas.
  - Suvirinimo jungčių briaunų paruošimas turi būti atliekamas pagal EN ISO 9692-1.
  - Metaliniai elementai tarpusavyje suvirinami, siūlės aukštis 1,2·kf - plonesniojo iš jungiamųjų elementų storis (jei nenurodyta kitaip), pagal LST EN ISO 9692-1:2004.
  - Konstrukcijų suvirinimui naudojamos suvirinimo medžiagos užtikrinančios suvirinimo siūlės skaičiuojamuosius stiprius ne mažesnius nei suvirinamo metalo.
  - Metaliniai paviršiai gruntuojami ir dažomi, pagal LST EN ISO 12944-2:2000.
  - Skylės varžtams daromos 2 mm didesnės nei varžto diametras (jei brėžinyje nenurodyta kitaip).
  - Darbai vykdomi pagal darbo projektą.

SUMINIS MEDINIŲ PIRMO/ANTRO/TREČIO/KETVIRTO AUKŠTŲ SIJŲ SAŪAUDŲ KIEKIŲ ŽINIARAŠTIS

| Eil. Nr.                         | Pozicija | Pavadinimas                  | Žymuo | Mato vnt. | Kiekis | Sąnaudos |         | Svoris vnt., t | Papildomi duomenys |
|----------------------------------|----------|------------------------------|-------|-----------|--------|----------|---------|----------------|--------------------|
|                                  |          |                              |       |           |        | Vien.    | Iš viso |                |                    |
| 1                                |          | Sija 220x360x4750, GL28h     |       |           |        |          |         |                |                    |
| 2                                |          | Klijuota mediena GL28h       |       | m³        | 40     | 0.376    | 15.040  |                |                    |
| 3                                |          | Įdėtinų detalių plienas S355 |       | kg        | 40     | 20.00    | 800.0   |                |                    |
| 4                                |          | Sija 220x320x4750, GL28h     |       |           |        |          |         |                |                    |
| 5                                |          | Klijuota mediena GL28h       |       | m³        | 24     | 0.334    | 8.016   |                |                    |
| 6                                |          | Įdėtinų detalių plienas S355 |       | kg        | 24     | 10.00    | 240.0   |                |                    |
| 7                                |          | Sija 200x440x4750, GL28h     |       |           |        |          |         |                |                    |
| 8                                |          | Klijuota mediena GL28h       |       | m³        | 36     | 0.418    | 15.048  |                |                    |
| 9                                |          | Įdėtinų detalių plienas S355 |       | kg        | 36     | 30.00    | 1080.0  |                |                    |
| 10                               |          | Sija 200x360x4750, GL28h     |       |           |        |          |         |                |                    |
| 11                               |          | Klijuota mediena GL28h       |       | m³        | 40     | 0.342    | 13.680  |                |                    |
| 12                               |          | Sija 200x360x4780, GL28h     |       |           |        |          |         |                |                    |
| 13                               |          | Klijuota mediena GL28h       |       | m³        | 24     | 0.344    | 8.256   |                |                    |
| 14                               |          | Sija 200x360x4795, GL28h     |       |           |        |          |         |                |                    |
| 15                               |          | Klijuota mediena GL28h       |       | m³        | 36     | 0.345    | 12.420  |                |                    |
| Viso klijuotos medienos, m³:     |          |                              |       |           |        |          | 72.460  |                |                    |
| Viso įdėtinų detalių plieno, kg: |          |                              |       |           |        |          | 2120.0  |                |                    |

KOLONOS TVIRTINIMO SU KOLONA, SIJA IR RYŠIAIS MAZGAS MASTELIS 1:10

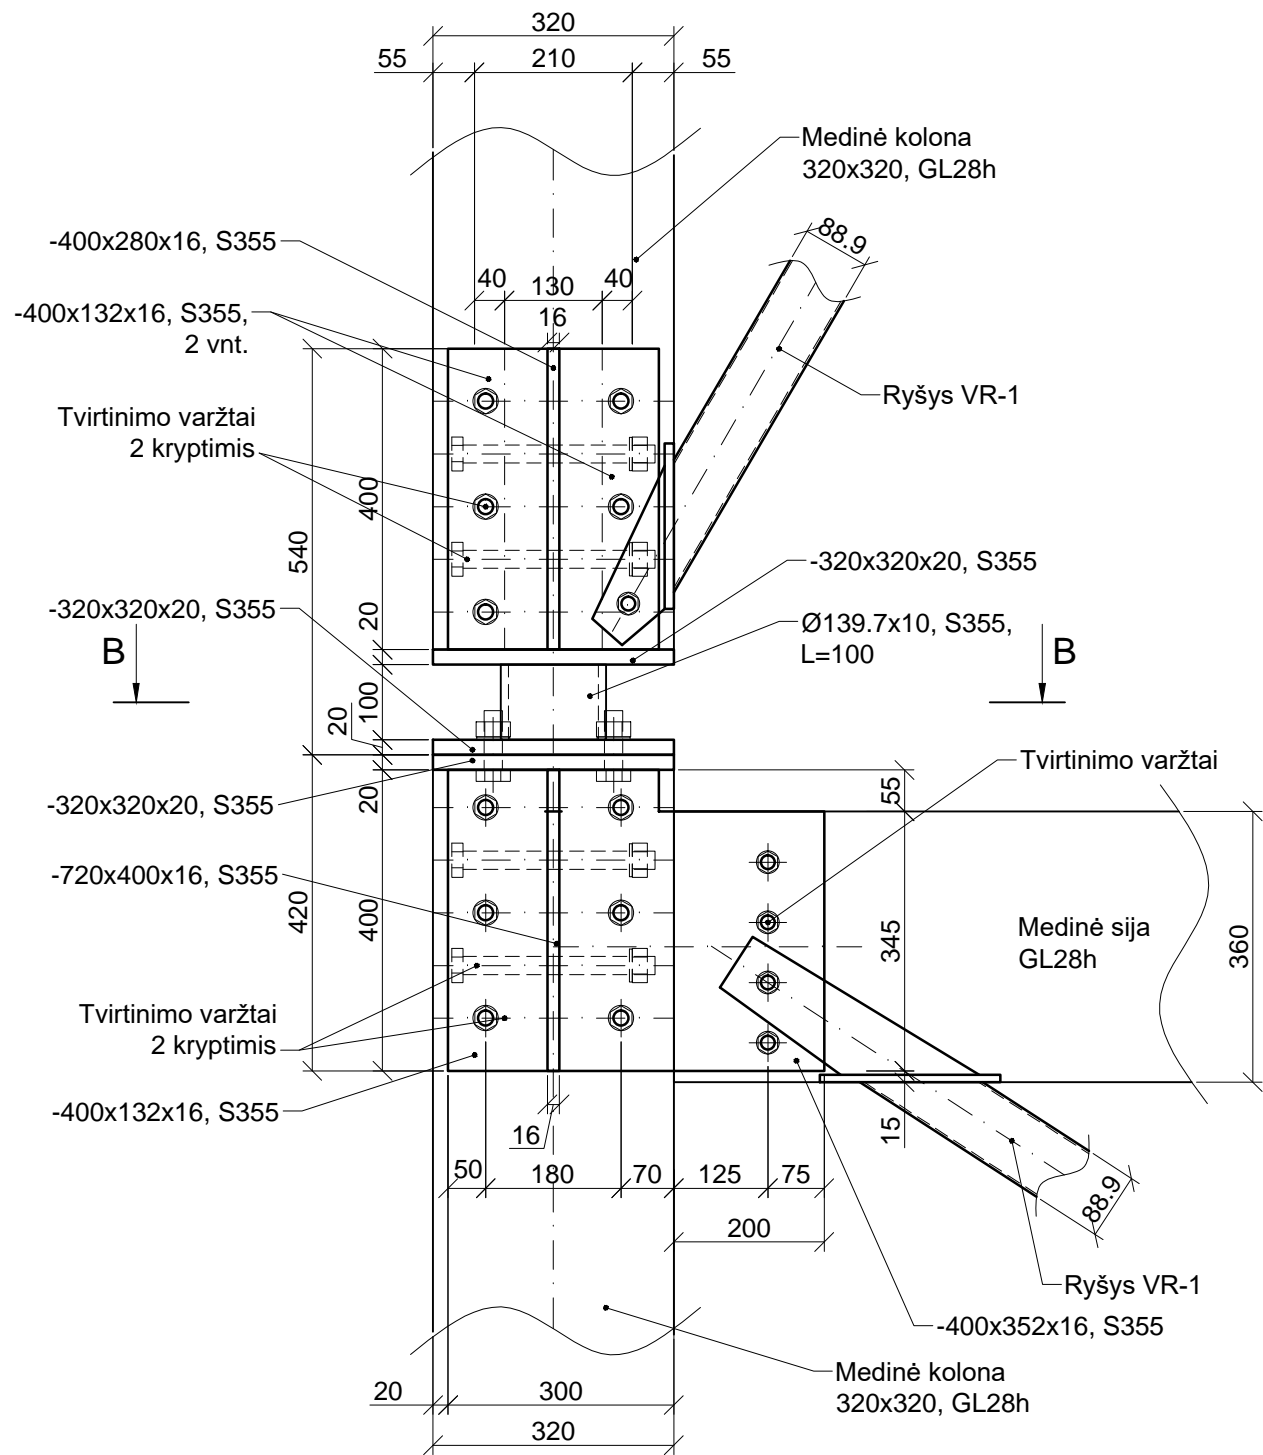

|                            |                                                                                                                                |                                                                                                                                                                      |         |                     |                                                                                                                       |                                                         |       |       |
|----------------------------|--------------------------------------------------------------------------------------------------------------------------------|----------------------------------------------------------------------------------------------------------------------------------------------------------------------|---------|---------------------|-----------------------------------------------------------------------------------------------------------------------|---------------------------------------------------------|-------|-------|
| KVAL.<br>PATV.<br>DOK. NR. |                                           | UAB "Konstrukcijų pasaulis"<br>Jonavos g. 260, Kaunas<br>Įm. k.: 304690224<br>Tel. +370 (613) 98089<br>El.p.: k.pazereckas@gmail.com<br>www.konstrukciju-pasaulis.lt |         |                     | STATINIO PROJEKTO PAVADINIMAS<br>Negyvenamasis 5 aukštų klijuotosios medienos konstrukcijų mokslo paskirties pastatas |                                                         |       |       |
|                            |                                                                                                                                | 37603                                                                                                                                                                | PDV     | Kęstutis Pažereckas | 2018 08                                                                                                               | DOKUMENTO PAVADINIMAS                                   |       | LAIDA |
|                            |                                                                                                                                | 37603                                                                                                                                                                | Konstr. | Kęstutis Pažereckas | 2018 08                                                                                                               | Pirmo/antro/trečio/ketvirto aukštų perdangų sijų planas |       | O     |
|                            |                                                                                                                                |                                                                                                                                                                      |         |                     |                                                                                                                       |                                                         |       |       |
| LT                         | UŽSAKOVAS<br>Miškų institutas, Lietuvos agrarinių ir miškų mokslų centro filialas, Liepų g. 1, Girionių k., LT-53101, Kauno r. |                                                                                                                                                                      |         |                     | BRĖŽINIO ŽYMUO<br>KPRS18/02-TP-SK-4.9                                                                                 |                                                         | LAPAS | LAPŲ  |
|                            |                                                                                                                                |                                                                                                                                                                      |         |                     |                                                                                                                       |                                                         | 1     | 1     |

PIRMO / ANTRO / TREČIO / KETVIRTO AUKŠTŲ PERDANGŲ ILGINIŲ (PASKIRSTOMJŲJŲ SIJŲ) PLANAS  
MASTELIS 1:100

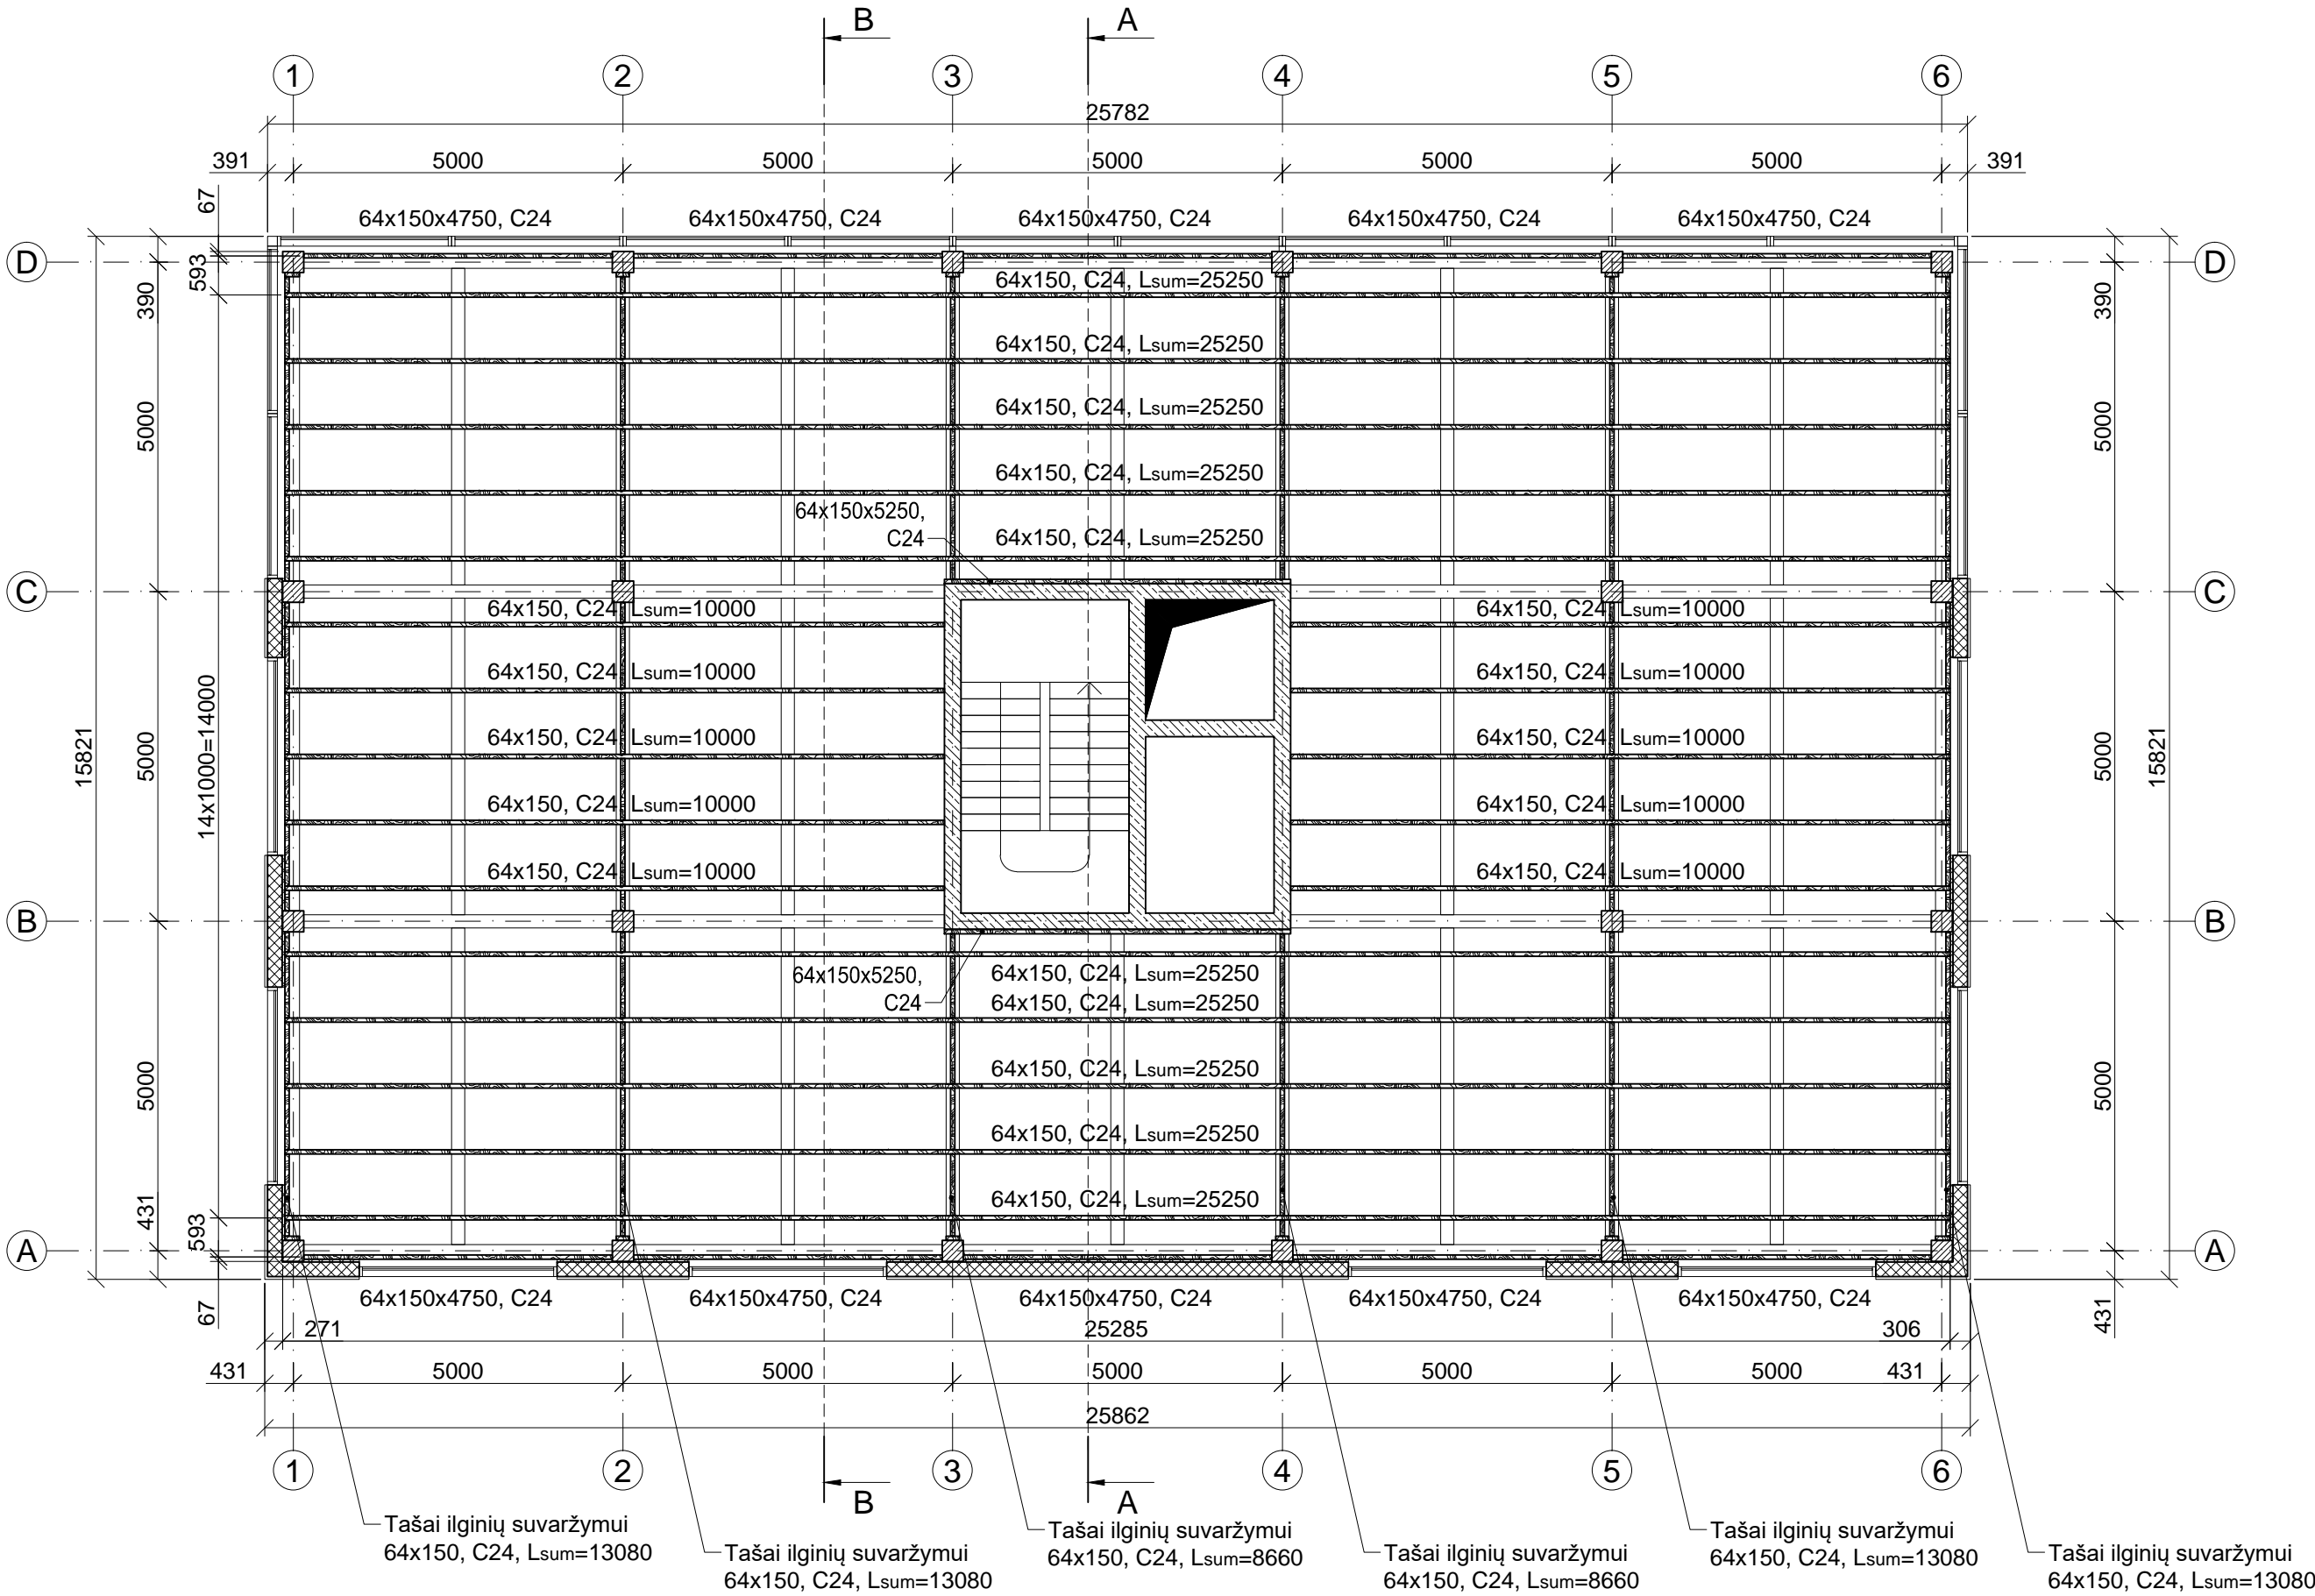

SUMINIS PIRMO/ANTRO/TREČIO/KETVIRTO AUKŠTŲ PERDANGOS ILGINIŲ IR PAKLOTŲ  
SĄNAUDŲ KIEKIŲ ŽINIARAŠTIS

| Eil. Nr.                     | Pozicija | Pavadinimas              | Žymuo | Mato vnt. | Kiekis | Sąnaudos |         | Svoris vnt., t | Papildomi duomenys |
|------------------------------|----------|--------------------------|-------|-----------|--------|----------|---------|----------------|--------------------|
|                              |          |                          |       |           |        | Vien.    | Iš viso |                |                    |
| 1                            |          | Ilginis 64x150x25250     |       |           |        |          |         |                |                    |
| 2                            |          | Pjautinė mediena C24     |       | m³        | 40     | 0.267    | 10.680  |                |                    |
| 3                            |          | Ilginis 64x150x10000     |       |           |        |          |         |                |                    |
| 4                            |          | Pjautinė mediena C24     |       | m³        | 40     | 0.106    | 4.240   |                |                    |
| 5                            |          | Ilginis 64x150x5250      |       |           |        |          |         |                |                    |
| 6                            |          | Pjautinė mediena C24     |       | m³        | 8      | 0.051    | 0.408   |                |                    |
| 7                            |          | Ilginis 64x150x4750      |       |           |        |          |         |                |                    |
| 8                            |          | Pjautinė mediena C24     |       | m³        | 40     | 0.046    | 1.840   |                |                    |
| 9                            |          | Pagalbiniai tašai 64x150 |       |           |        |          |         |                |                    |
| 10                           |          | Pjautinė mediena C24     |       | m³        | -      | -        | 2.800   |                |                    |
| 11                           |          | Lentų paklotas           |       |           |        |          |         |                |                    |
| 12                           |          | Pjautinė mediena C24     |       | m³        | -      | -        | 35.800  |                |                    |
| Viso pjautinės medienos, m³: |          |                          |       |           |        |          | 55.768  |                |                    |

PASTABOS:

- Medinių paskirstomųjų ilginių ir pagalbinių tašų gamybai naudojama C24 stiprumo klasės vientisoji spygliuočių mediena.
- Ilginių montavimui ant sijų naudojamos standartizuotos plieninės detalės ir sraigtinės vinys, bei medisraigčiai.
- Monolitiniams laiptinių ir lifto šachtų standumo sienoms naudojamas C30/37 X0 klasės betonas, pagal LST EN 206-1:2002.
- Monolitiniai elementai armuojami S500 stiprumo klasės armatūros tinklais ir/ar strypynais, pagal LST EN ISO 15630-1:2010.
- Metalinėms konstrukcijoms ir elementams naudojamas S355 stiprumo klasės plienas.
- Suvirinimo jungčių briaunų paruošimas turi būti atliekamas pagal EN ISO 9692-1.
- Metaliniai elementai tarpusavyje suvirinami, siūlės aukštis 1,2- $k_f$  - plonesniojo iš jungiamųjų elementų storis (jei nenurodyta kitaip), pagal LST EN ISO 9692-1:2004.
- Konstrukcijų suvirinimui naudojamos suvirinimo medžiagos užtikrinančios suvirinimo siūlės skaičiuojamuosius stiprius ne mažesnius nei suvirinamo metalo.
- Metaliniai paviršiai gruntuojami ir dažomi, pagal LST EN ISO 12944-2:2000.
- Skylės varžtams daromos 2 mm didesnės nei varžto diametras (jei brėžinyje nenurodyta kitaip).
- Darbai vykdomi pagal darbo projektą.

|                            |                                                                                                                                |                                                                                                                                                                      |         |                     |                                                                                                                       |                                                                                 |  |       |      |
|----------------------------|--------------------------------------------------------------------------------------------------------------------------------|----------------------------------------------------------------------------------------------------------------------------------------------------------------------|---------|---------------------|-----------------------------------------------------------------------------------------------------------------------|---------------------------------------------------------------------------------|--|-------|------|
| KVAL.<br>PATV.<br>DOK. NR. |                                                                                                                                | UAB "Konstrukcijų pasaulis"<br>Jonavos g. 260, Kaunas<br>Įm. k.: 304690224<br>Tel. +370 (613) 98089<br>El.p.: k.pazereckas@gmail.com<br>www.konstrukciju-pasaulis.lt |         |                     | STATINIO PROJEKTO PAVADINIMAS<br>Negyvenamasis 5 aukštų klijuotosios medienos konstrukcijų mokslo paskirties pastatas |                                                                                 |  |       |      |
|                            |                                                                                                                                | 37603                                                                                                                                                                | PDV     | Kęstutis Pažereckas | 2018 08                                                                                                               | DOKUMENTO PAVADINIMAS                                                           |  | LAIDA |      |
|                            |                                                                                                                                | 37603                                                                                                                                                                | Konstr. | Kęstutis Pažereckas | 2018 08                                                                                                               | Pirmo/antro/trečio/ketvirto aukštų perdangų ilginių (paskirstomųjų sijų) planas |  |       |      |
|                            |                                                                                                                                |                                                                                                                                                                      |         |                     |                                                                                                                       |                                                                                 |  | O     |      |
| LT                         | UŽSAKOVAS<br>Miškų institutas, Lietuvos agrarinių ir miškų mokslų centro filialas, Liepų g. 1, Girionių k., LT-53101, Kauno r. |                                                                                                                                                                      |         |                     | BRĖŽINIO ŽYMUO<br><br>KPRS18/02-TP-SK-4.10                                                                            |                                                                                 |  | LAPAS | LAPŲ |
|                            |                                                                                                                                |                                                                                                                                                                      |         |                     |                                                                                                                       |                                                                                 |  | 1     | 1    |



ANTRO / TREČIO / KETVIRTO / PENKTO AUKŠTO PLANAS MASTELIS 1:100

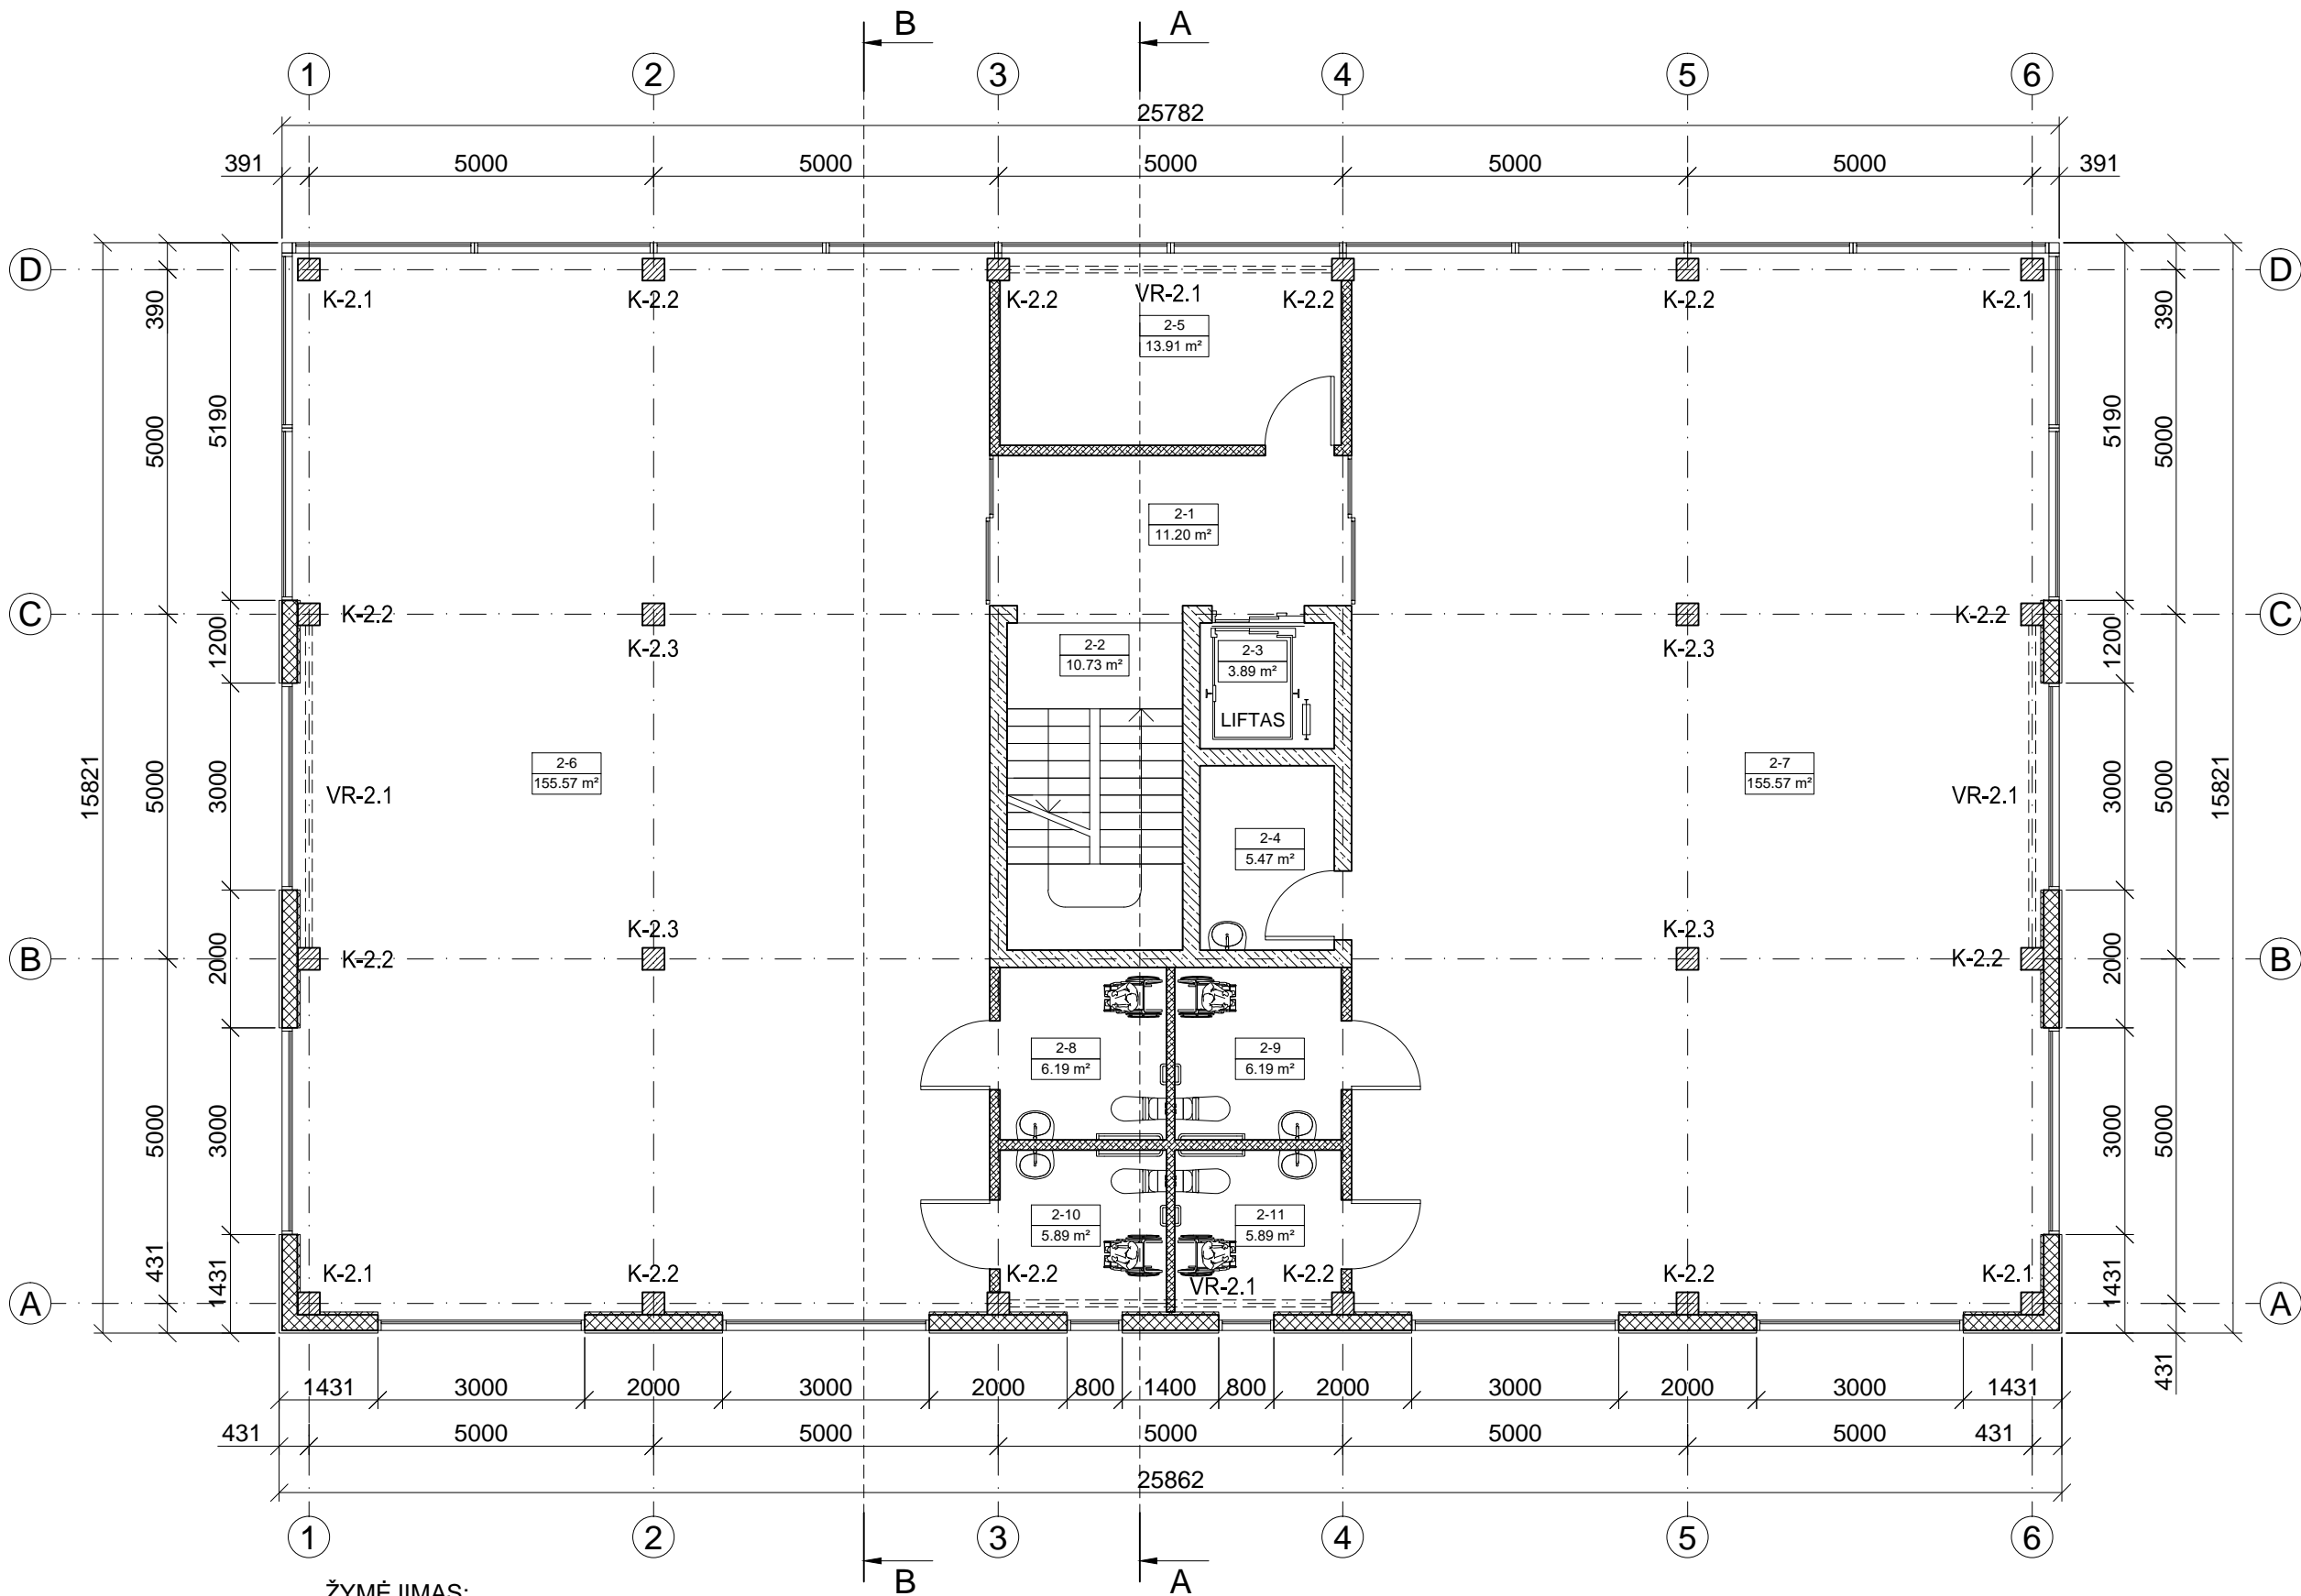

ŽYMĖJIMAS:  
K-... - Medinė kolona;  
VR-... - Plieniniai vertikalieji ryšiai;

| Patalpų eksplikacija |                  |            |
|----------------------|------------------|------------|
| Numeris              | Patalpa          | Plotas     |
| 2-1                  | Fojė             | 11.20 m²   |
| 2-2                  | Laiptinė         | 12.71 m²   |
| 2-3                  | Lifto šachta     | 3.89 m²    |
| 2-4                  | Tech. patalpa    | 5.47 m²    |
| 2-5                  | Tech. patalpa    | 13.91 m²   |
| 2-6                  | Ištaigų patalpos | 155.57 m²  |
| 2-7                  | Ištaigų patalpos | 155.57 m²  |
| 2-8                  | San. mazgas      | 6.19 m²    |
| 2-9                  | San. mazgas      | 6.19 m²    |
| 2-10                 | San. mazgas      | 5.89 m²    |
| 2-11                 | San. mazgas      | 5.89 m²    |
| Viso aukšte:         |                  | 382.48 m²  |
| Viso pastate:        |                  | 1912.71 m² |

- PASTABOS:
- Medinių kolonų montavimui ant pamato bei tarpusavio sujungimams naudojamos įdėtinės plieninės kolonų detalės ir inkariniai varžtai.
  - Medinių kolonų įdėtinės detalės projektuojamos darbo projekto stadijoje.
  - Kolonoms naudojama GL28h stiprumo klasės klijuotoji sluoksninė mediena.
  - Medinių kolonų atsparumas ugniai R45 min užtikrinamas skaičiavimais, papildomu apsauginiu medienos sluoksniu.
  - Monolitinėms laiptinių ir lifto šachtų standumo sienoms naudojamas C30/37 X0 klasės betonas, pagal LST EN 206-1:2002.
  - Monolitiniai elementai armuojami S500 stiprumo klasės armatūros tinklais ir/ar strypynais, pagal LST EN ISO 15630-1:2010.
  - Metalinėms konstrukcijoms ir elementams naudojamas S355 stiprumo klasės plienas.
  - Suvirinimo jungčių briaunų paruošimas turi būti atliekamas pagal EN ISO 9692-1.
  - Metaliniai elementai tarpusavyje suvirinami, siūlės aukštis 1,2·kf - plonesniojo iš jungiamųjų elementų storis (jei nenurodyta kitaip), pagal LST EN ISO 9692-1:2004.
  - Konstrukcijų suvirinimui naudojamos suvirinimo medžiagos užtikrinančios suvirinimo siūlės skaičiuojamuosius stiprius ne mažesnius nei suvirinamo metalo.
  - Metaliniai paviršiai gruntuojami ir dažomi, pagal LST EN ISO 12944-2:2000.
  - Skylės varžtams daromos 2 mm didesnės nei varžto diameteras (jei brėžinyje nenurodyta kitaip).
  - Darbai vykdomi pagal darbo projektą.

SUMINIS MEDINIŲ ANTRO/TREČIO/KETVIRTO/PENKTO AUKŠTŲ KOLONŲ SĄNAUDŲ KIEKIŲ ŽINIARAŠTIS

| Eil. Nr.                         | Pozicija | Pavadinimas                  | Žymuo | Mato vnt. | Kiekis | Sąnaudos |         | Svoris vnt., t | Papildomi duomenys |
|----------------------------------|----------|------------------------------|-------|-----------|--------|----------|---------|----------------|--------------------|
|                                  |          |                              |       |           |        | Vien.    | Iš viso |                |                    |
| 1                                | K-x.1    | Kolona 320x320x3430          |       |           |        |          |         |                |                    |
| 2                                |          | Klijuota mediena GL28h       |       | m³        | 16     | 0,344    | 5 504   |                |                    |
| 3                                |          | Jungimo detalių plienas S355 |       | kg        | 16     | 110.00   | 1760.0  |                |                    |
| 4                                | K-x.2    | Kolona 320x320x3430          |       |           |        |          |         |                |                    |
| 5                                |          | Klijuota mediena GL28h       |       | m³        | 48     | 0,344    | 16 512  |                |                    |
| 6                                |          | Jungimo detalių plienas S355 |       | kg        | 48     | 120.00   | 5760.0  |                |                    |
| 7                                | K-x.3    | Kolona 320x320x3430          |       |           |        |          |         |                |                    |
| 8                                |          | Klijuota mediena GL28h       |       | m³        | 16     | 0,344    | 5 504   |                |                    |
| 9                                |          | Jungimo detalių plienas S355 |       | kg        | 16     | 130.00   | 2080.0  |                |                    |
| Viso klijuotos medienos, m³:     |          |                              |       |           |        |          | 27.520  |                |                    |
| Viso jungimo detalių plieno, kg: |          |                              |       |           |        |          | 9600.0  |                |                    |

SUMINIS ANTRO/TREČIO/KETVIRTO/PANKTO AUKŠTŲ PLIENINIŲ RYŠIŲ SĄNAUDŲ KIEKIŲ ŽINIARAŠTIS

| Eil. Nr.         | Pozicija | Pavadinimas                  | Žymuo | Mato vnt. | Kiekis | Sąnaudos |         | Svoris vnt., t | Papildomi duomenys |
|------------------|----------|------------------------------|-------|-----------|--------|----------|---------|----------------|--------------------|
|                  |          |                              |       |           |        | Vien.    | Iš viso |                |                    |
| 1                | VR-x.1   | Plieniniai vertikalūs ryšiai |       |           | 16     | 196.90   | 3150.4  |                |                    |
| 2                |          | Ø101.6x6, S355, L=4700       |       | kg        | 1      | 66.98    | 66.98   |                |                    |
| 3                |          | Ø88.9x5, S355, L=2573        |       | kg        | 2      | 26.50    | 53.00   |                |                    |
| 4                |          | Ø88.9x5, S355, L=1100        |       | kg        | 2      | 11.33    | 22.66   |                |                    |
| 5                |          | Ø88.9x5, S355, L=1012        |       | kg        | 2      | 10.42    | 20.84   |                |                    |
| 6                |          | -385x100x8, S355             |       | kg        | 4      | 1.75     | 7.00    |                |                    |
| 7                |          | -210x120x8, S355             |       | kg        | 2      | 1.58     | 3.16    |                |                    |
| 8                |          | -355x100x8, S355             |       | kg        | 4      | 1.55     | 6.20    |                |                    |
| 9                |          | -240x120x8, S355             |       | kg        | 2      | 1.81     | 3.62    |                |                    |
| 10               |          | -220x120x8, S355             |       | kg        | 4      | 1.66     | 6.64    |                |                    |
| 11               |          | -120x120x8, S355             |       | kg        | 4      | 0.91     | 3.64    |                |                    |
| 12               |          | -270x85x8, S355              |       | kg        | 4      | 0.79     | 3.16    |                |                    |
| Viso plieno, kg: |          |                              |       |           |        |          | 3150.4  |                |                    |

|                            |                                                                                                                                |                                                                                                                                                                      |         |                     |                                                                                                                       |                                             |  |       |      |
|----------------------------|--------------------------------------------------------------------------------------------------------------------------------|----------------------------------------------------------------------------------------------------------------------------------------------------------------------|---------|---------------------|-----------------------------------------------------------------------------------------------------------------------|---------------------------------------------|--|-------|------|
| KVAL.<br>PATV.<br>DOK. NR. |                                                                                                                                | UAB "Konstrukcijų pasaulis"<br>Jonavos g. 260, Kaunas<br>Įm. k.: 304690224<br>Tel. +370 (613) 98089<br>El.p.: k.pazereckas@gmail.com<br>www.konstrukciju-pasaulis.lt |         |                     | STATINIO PROJEKTO PAVADINIMAS<br>Negyvenamasis 5 aukštų klijuotosios medienos konstrukcijų mokslo paskirties pastatas |                                             |  |       |      |
|                            |                                                                                                                                | 37603                                                                                                                                                                | PDV     | Kęstutis Pažereckas | 2018 08                                                                                                               | DOKUMENTO PAVADINIMAS                       |  | LAIDA |      |
|                            |                                                                                                                                | 37603                                                                                                                                                                | Konstr. | Kęstutis Pažereckas | 2018 08                                                                                                               | Antro/trečio/ketvirtio/penkto aukštų planas |  | O     |      |
|                            |                                                                                                                                |                                                                                                                                                                      |         |                     |                                                                                                                       |                                             |  |       |      |
| LT                         | UŽSAKOVAS<br>Miškų institutas, Lietuvos agrarinių ir miškų mokslų centro filialas, Liepų g. 1, Girionių k., LT-53101, Kauno r. |                                                                                                                                                                      |         |                     | BRĖŽINIO ŽYMUO<br>KPRS18/02-TP-SK-4.11                                                                                |                                             |  | LAPAS | LAPŲ |
|                            |                                                                                                                                |                                                                                                                                                                      |         |                     |                                                                                                                       |                                             |  | 1     | 1    |
|                            |                                                                                                                                |                                                                                                                                                                      |         |                     |                                                                                                                       |                                             |  |       |      |

DENGINIO SIJŲ PLANAS MASTELIS 1:100

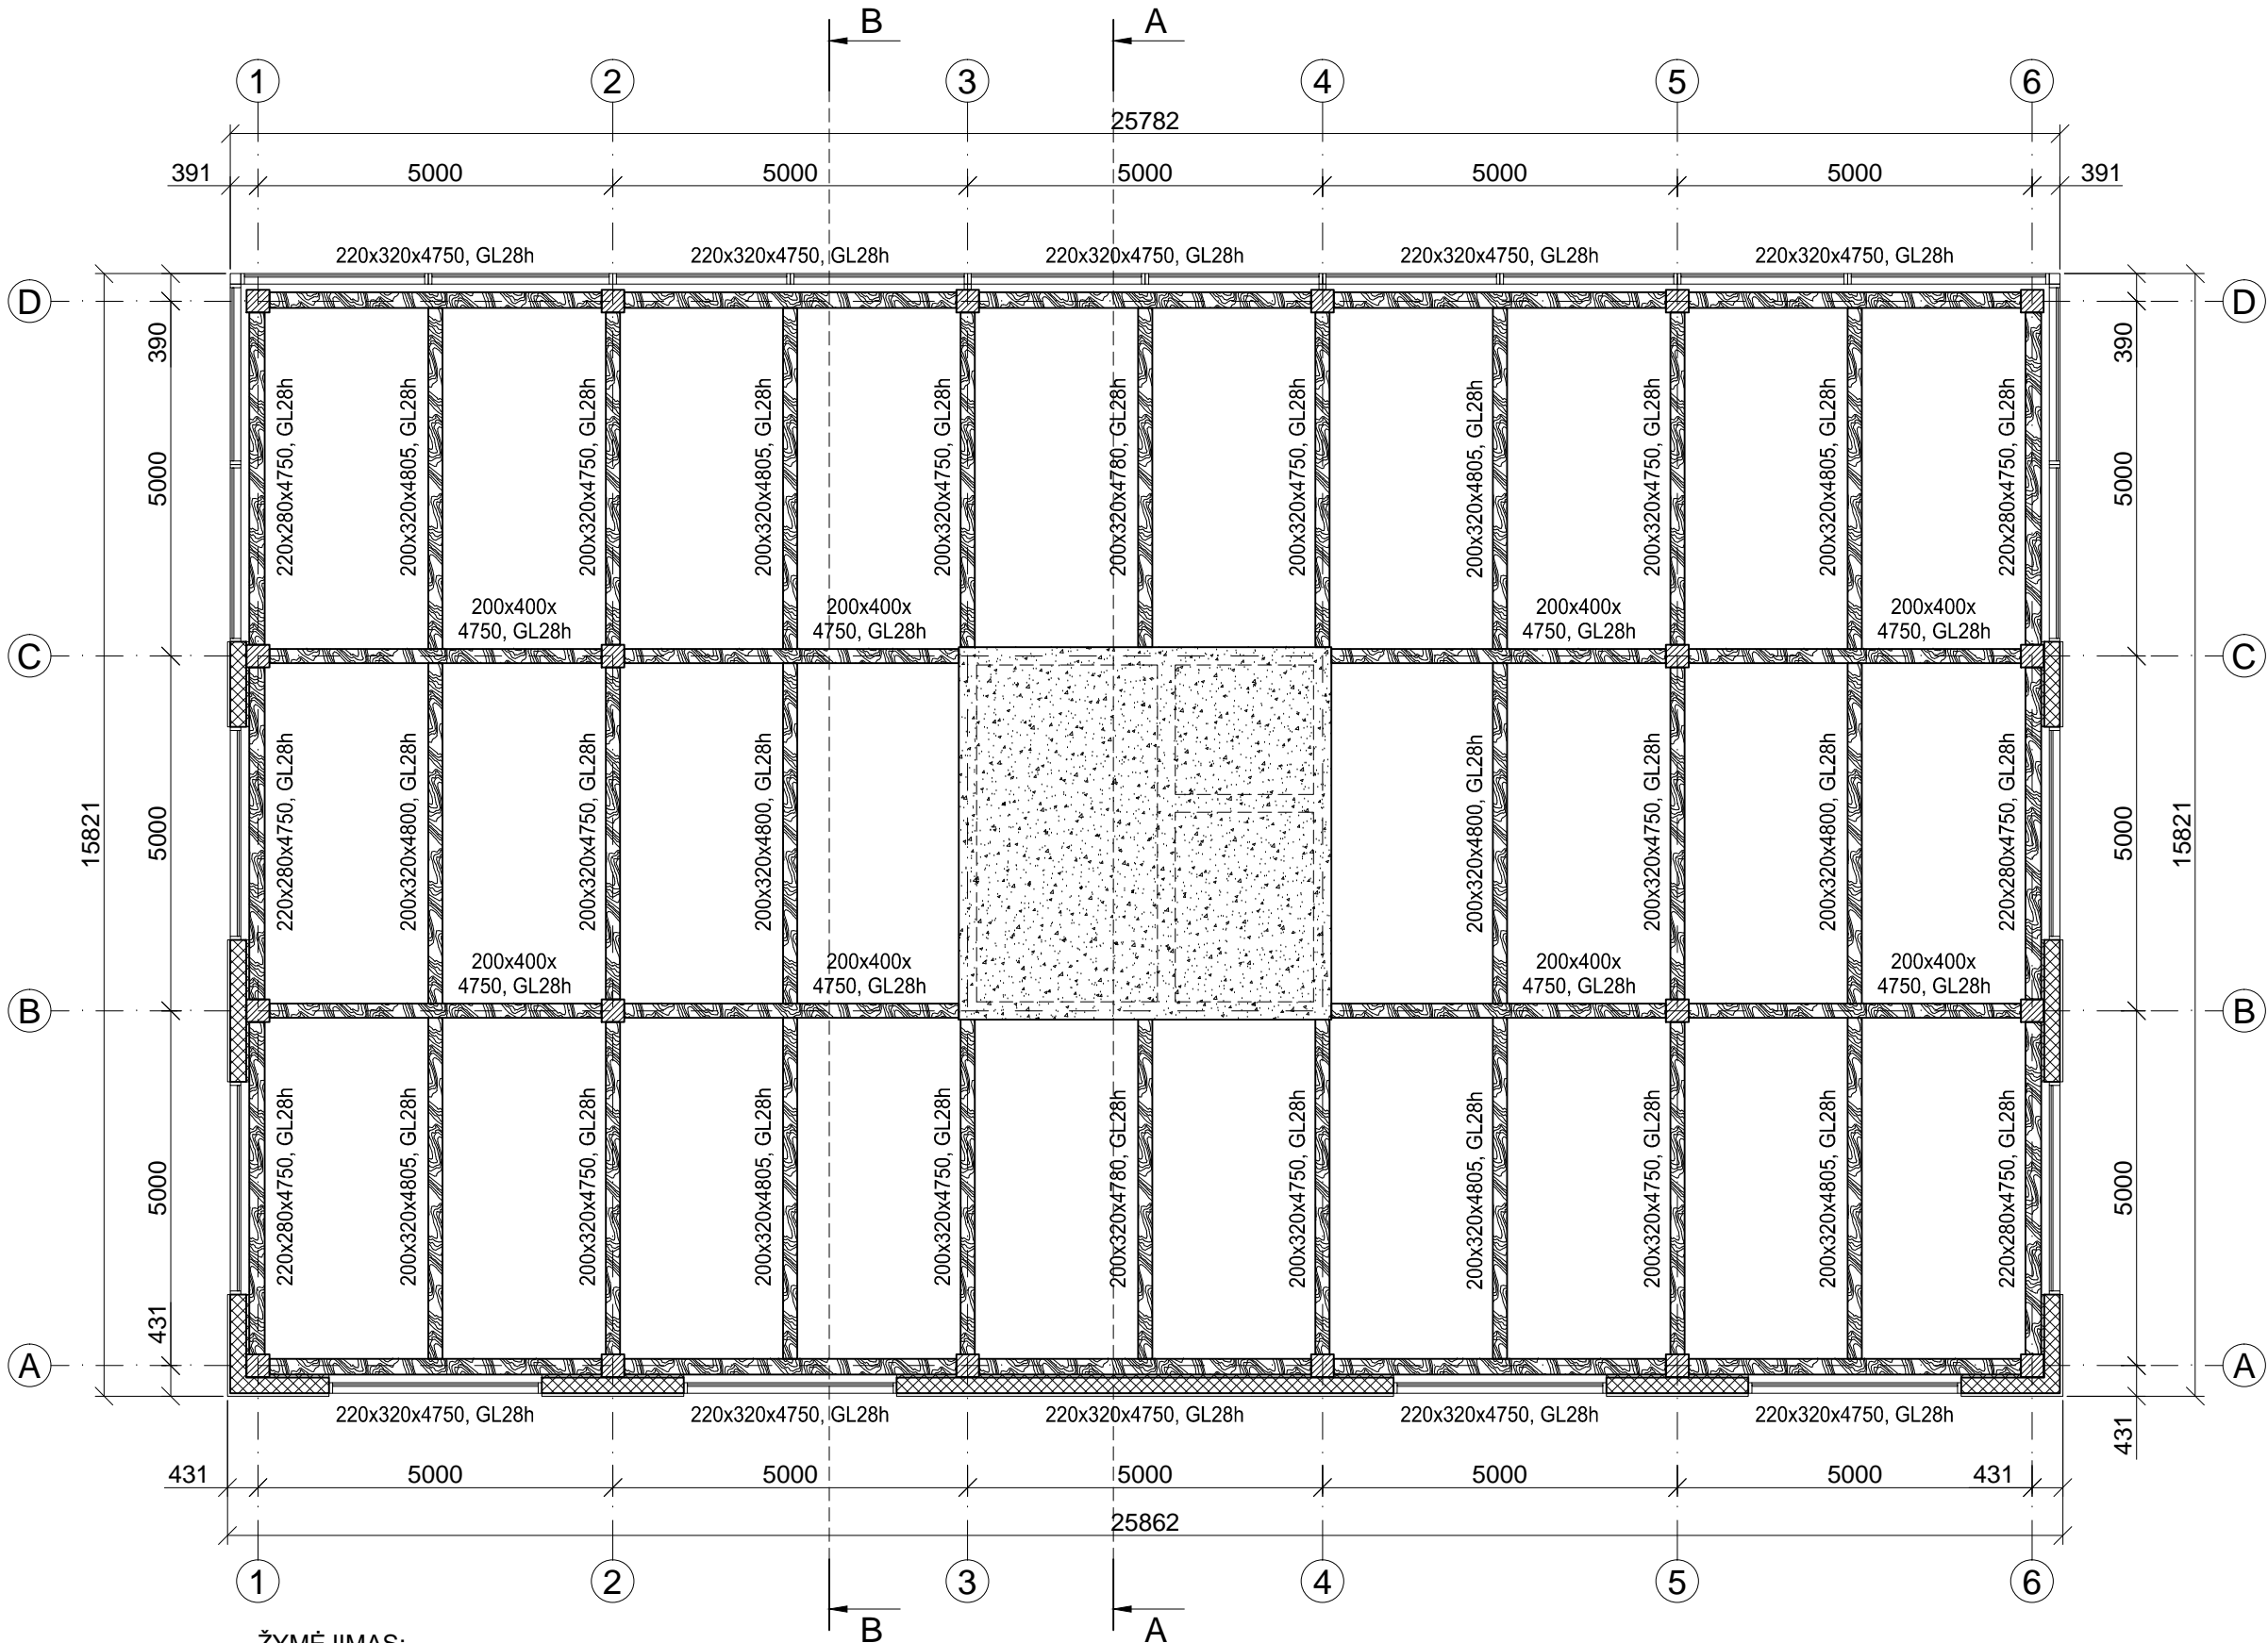

ŽYMĖJIMAS:  
200x320x4805, GL28h  
200 - sijos plotis, mm;  
320 - sijos aukštis, mm;  
4805 - sijos ilgis, mm;  
GL28h - klijuotosios medienos stiprumo klasė.

MEDINIŲ DENGINIO SIJŲ SĄNAUDŲ KIEKIŲ ŽINIARAŠTIS

| Eil. Nr. | Pozicija | Pavadinimas                   | Žymuo | Mato vnt. | Kiekis | Sąnaudos                          |         | Svoris vnt., t | Papildomi duomenys |
|----------|----------|-------------------------------|-------|-----------|--------|-----------------------------------|---------|----------------|--------------------|
|          |          |                               |       |           |        | Vien.                             | Iš viso |                |                    |
| 1        |          | Sija 220x320x4750, GL28h      |       |           |        |                                   |         |                |                    |
| 2        |          | Klijuota mediena GL28h        |       | m³        | 10     | 0.334                             | 3.340   |                |                    |
| 3        |          | Idėtinių detalių plienas S355 |       | kg        | 10     | 20.00                             | 200.00  |                |                    |
| 4        |          | Sija 220x280x4750, GL28h      |       |           |        |                                   |         |                |                    |
| 5        |          | Klijuota mediena GL28h        |       | m³        | 6      | 0.293                             | 1.758   |                |                    |
| 6        |          | Idėtinių detalių plienas S355 |       | kg        | 6      | 10.00                             | 60.00   |                |                    |
| 7        |          | Sija 200x400x4750, GL28h      |       |           |        |                                   |         |                |                    |
| 8        |          | Klijuota mediena GL28h        |       | m³        | 8      | 0.380                             | 3.040   |                |                    |
| 9        |          | Idėtinių detalių plienas S355 |       | kg        | 8      | 30.00                             | 240.00  |                |                    |
| 10       |          | Sija 200x320x4750, GL28h      |       |           |        |                                   |         |                |                    |
| 11       |          | Klijuota mediena GL28h        |       | m³        | 10     | 0.304                             | 3.040   |                |                    |
| 12       |          | Sija 200x320x4780, GL28h      |       |           |        |                                   |         |                |                    |
| 13       |          | Klijuota mediena GL28h        |       | m³        | 6      | 0.306                             | 1.836   |                |                    |
| 14       |          | Sija 200x320x4805, GL28h      |       |           |        |                                   |         |                |                    |
| 15       |          | Klijuota mediena GL28h        |       | m³        | 8      | 0.308                             | 2.464   |                |                    |
|          |          |                               |       |           |        | Viso klijuotos medienos, m³:      |         | 15.478         |                    |
|          |          |                               |       |           |        | Viso idėtinių detalių plieno, kg: |         | 500.0          |                    |

PASTABOS:

- Surenkamų medinių sijų montavimui ant kolonų naudojamos paslėptos plieninės jungtys ir į sijas bei kolonas įleidžiami varžtai.
- Surenkamų medinių sijų idėtinės detalės projektuojamos darbo projekto studijoje.
- Medinėms sijoms naudojama GL28h stiprumo klasės klijuotoji sluoksninė mediena.
- Medinių sijų atsparumas ugniai R45 min užtikrinamas skaičiavimais, papildomu apsauginiu medienos sluoksniu.
- Monolitinėms laiptinių ir lifto šachtų standumo sienoms naudojamas C30/37 X0 klasės betonas, pagal LST EN 206-1:2002.
- Monolitiniai elementai armuojami S500 stiprumo klasės armatūros tinklais ir/ar strypynais, pagal LST EN ISO 15630-1:2010.
- Metalinėms konstrukcijoms ir elementams naudojamas S355 stiprumo klasės plienas.
- Suvirinimo jungčių briaunų paruošimas turi būti atliekamas pagal EN ISO 9692-1.
- Metaliniai elementai tarpusavyje suvirinami, siūlės aukštis 1,2·kf - plonesniojo iš jungiamųjų elementų storis (jei nenurodyta kitaip), pagal LST EN ISO 9692-1:2004.
- Konstrukcijų suvirinimui naudojamos suvirinimo medžiagos užtikrinančios suvirinimo siūlės skaičiuojamuosius stiprius ne mažesnius nei suvirinamo metalo.
- Metaliniai paviršiai gruntuojami ir dažomi, pagal LST EN ISO 12944-2:2000.
- Skylės varžtams daromos 2 mm didesnės nei varžto diameteras (jei brėžinyje nenurodyta kitaip).
- Darbai vykdomi pagal darbo projektą.

|                      |                                                                                                                                |                                                                                                                                                                      |  |                                                                                                                       |      |  |
|----------------------|--------------------------------------------------------------------------------------------------------------------------------|----------------------------------------------------------------------------------------------------------------------------------------------------------------------|--|-----------------------------------------------------------------------------------------------------------------------|------|--|
| KVAL. PATV. DOK. NR. |                                                                                                                                | UAB "Konstrukcijų pasaulis"<br>Jonavos g. 260, Kaunas<br>Įm. k.: 304690224<br>Tel. +370 (613) 98089<br>El.p.: k.pazereckas@gmail.com<br>www.konstrukciju-pasaulis.lt |  | STATINIO PROJEKTO PAVADINIMAS<br>Negyvenamasis 5 aukštų klijuotosios medienos konstrukcijų mokslo paskirties pastatas |      |  |
|                      |                                                                                                                                |                                                                                                                                                                      |  | DOKUMENTO PAVADINIMAS<br>Denginio sijų planas                                                                         |      |  |
|                      |                                                                                                                                |                                                                                                                                                                      |  | BREŽINIO ŽYMUO                                                                                                        |      |  |
|                      |                                                                                                                                |                                                                                                                                                                      |  | KPRS18/02-TP-SK-4.12                                                                                                  |      |  |
| LT                   | UŽSAKOVAS<br>Miškų institutas, Lietuvos agrarinių ir miškų mokslų centro filialas, Liepų g. 1, Girionių k., LT-53101, Kauno r. |                                                                                                                                                                      |  | LAPAS                                                                                                                 | LAPŲ |  |
|                      |                                                                                                                                |                                                                                                                                                                      |  |                                                                                                                       | 1 1  |  |



DENGINIO ILGINIŲ (PASKIRSTOMŲJŲ SIJŲ) PLANAS MASTELIS 1:100

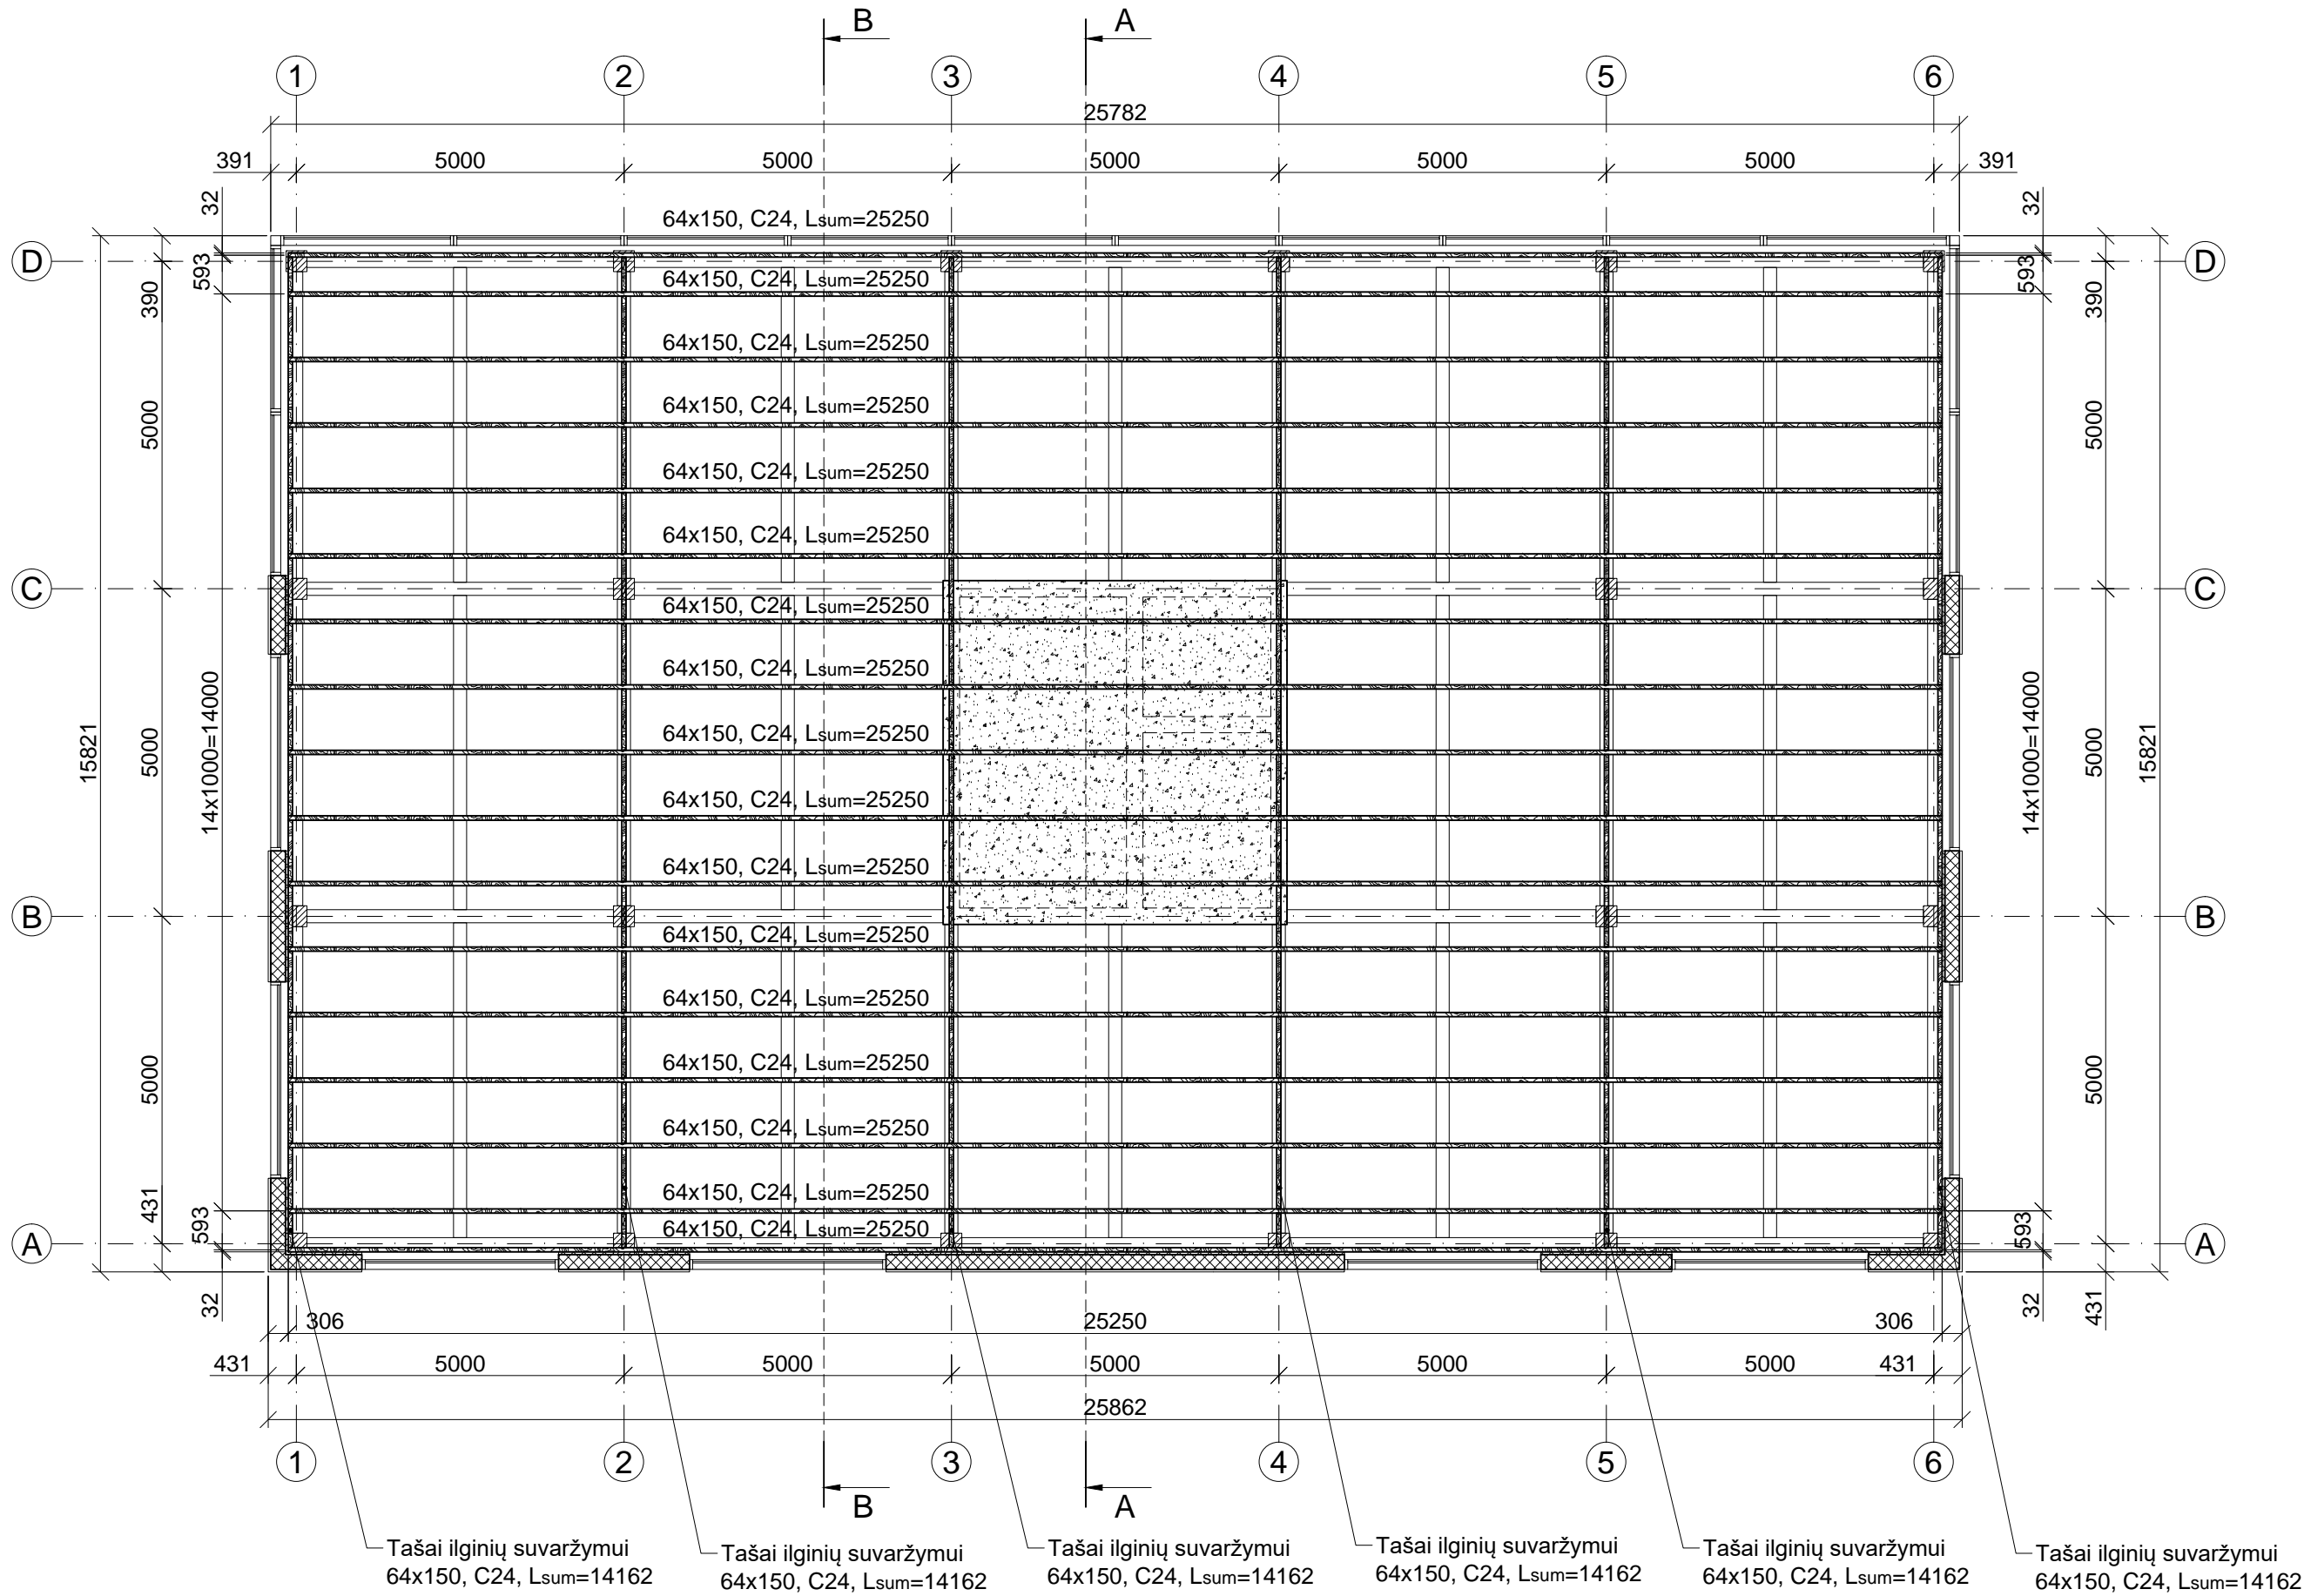

DENGINIO ILGINIŲ IR PAKLOTO SĄNAUDŲ KIEKIŲ ŽINIARAŠTIS

| Eil. Nr.                     | Pozicija | Pavadinimas              | Žymuo | Mato vnt. | Kiekis | Sąnaudos |         | Svoris vnt., t | Papildomi duomenys |
|------------------------------|----------|--------------------------|-------|-----------|--------|----------|---------|----------------|--------------------|
|                              |          |                          |       |           |        | Vien.    | Iš viso |                |                    |
| 1                            |          | Ilginis 64x150x25250     |       |           |        |          |         |                |                    |
| 2                            |          | Pjautinė mediena C24     |       | m³        | 17     | 0.267    | 4.539   |                |                    |
| 3                            |          | Pagalbiniai tašai 64x150 |       |           |        |          |         |                |                    |
| 4                            |          | Pjautinė mediena C24     |       | m³        | -      | -        | 0.820   |                |                    |
| 5                            |          | Lentų paklotas           |       |           |        |          |         |                |                    |
| 6                            |          | Pjautinė mediena C24     |       | m³        | -      | -        | 9.628   |                |                    |
| Viso pjautinės medienos, m³: |          |                          |       |           |        |          |         | 14.987         |                    |

PASTABOS:

- Medinių paskirstomųjų ilginių ir pagalbinių tašų gamybai naudojama C24 stiprumo klasės vientisoji spygliuočių mediena.
- Ilginių montavimui ant sijų naudojamos standartizuotos plieninės detalės ir sraigtinės vinys, bei medisraigčiai.
- Monolitinėms laiptinių ir lifto šachtų standumo sienoms naudojamas C30/37 X0 klasės betonas, pagal LST EN 206-1:2002.
- Monolitiniai elementai armuojami S500 stiprumo klasės armatūros tinklais ir/ar strypynais, pagal LST EN ISO 15630-1:2010.
- Metalinėms konstrukcijoms ir elementams naudojamas S355 stiprumo klasės plienas.
- Suvirinimo jungčių briaunų paruošimas turi būti atliekamas pagal EN ISO 9692-1.
- Metaliniai elementai tarpusavyje suvirinami, siūlės aukštis 1,2-kf - plonesniojo iš jungiamųjų elementų storis (jei nenurodyta kitaip), pagal LST EN ISO 9692-1:2004.
- Konstrukcijų suvirinimui naudojamos suvirinimo medžiagos užtikrinančios suvirinimo siūlės skaičiuojamuosius stiprius ne mažesnius nei suvirinamo metalo.
- Metaliniai paviršiai gruntuojami ir dažomi, pagal LST EN ISO 12944-2:2000.
- Skylės varžtams daromos 2 mm didesnės nei varžto diametras (jei brėžinyje nenurodyta kitaip).
- Darbai vykdomi pagal darbo projektą.

|                            |                                                                                                                                   |                                                                                                                                                                      |         |                     |                                                                                                                       |                                                                       |       |       |
|----------------------------|-----------------------------------------------------------------------------------------------------------------------------------|----------------------------------------------------------------------------------------------------------------------------------------------------------------------|---------|---------------------|-----------------------------------------------------------------------------------------------------------------------|-----------------------------------------------------------------------|-------|-------|
| KVAL.<br>PATV.<br>DOK. NR. |                                              | UAB "Konstrukcijų pasaulis"<br>Jonavos g. 260, Kaunas<br>Įm. k.: 304690224<br>Tel. +370 (613) 98089<br>El.p.: k.pazereckas@gmail.com<br>www.konstrukciju-pasaulis.lt |         |                     | STATINIO PROJEKTO PAVADINIMAS<br>Negyvenamasis 5 aukštų klijuotosios medienos konstrukcijų mokslo paskirties pastatas |                                                                       |       |       |
|                            |                                                                                                                                   | 37603                                                                                                                                                                | PDV     | Kęstutis Pažereckas | 2018 08                                                                                                               | DOKUMENTO PAVADINIMAS<br>Denginio ilginių (paskirstomųjų sijų) planas |       | LAIDA |
|                            |                                                                                                                                   | 37603                                                                                                                                                                | Konstr. | Kęstutis Pažereckas | 2018 08                                                                                                               |                                                                       |       | O     |
|                            |                                                                                                                                   |                                                                                                                                                                      |         |                     |                                                                                                                       |                                                                       |       |       |
| LT                         | UŽSAKOVAS<br>Miškų institutas, Lietuvos agrarinių ir miškų mokslų<br>centro filialas, Liepų g. 1, Girionių k., LT-53101, Kauno r. |                                                                                                                                                                      |         |                     | BRĖŽINIO ŽYMUO<br>KPRS18/02-TP-SK-4.13                                                                                |                                                                       | LAPAS | LAPŲ  |
|                            |                                                                                                                                   |                                                                                                                                                                      |         |                     |                                                                                                                       |                                                                       | 1     | 1     |
|                            |                                                                                                                                   |                                                                                                                                                                      |         |                     |                                                                                                                       |                                                                       |       |       |

PJŪVIS A-A MASTELIS 1:50

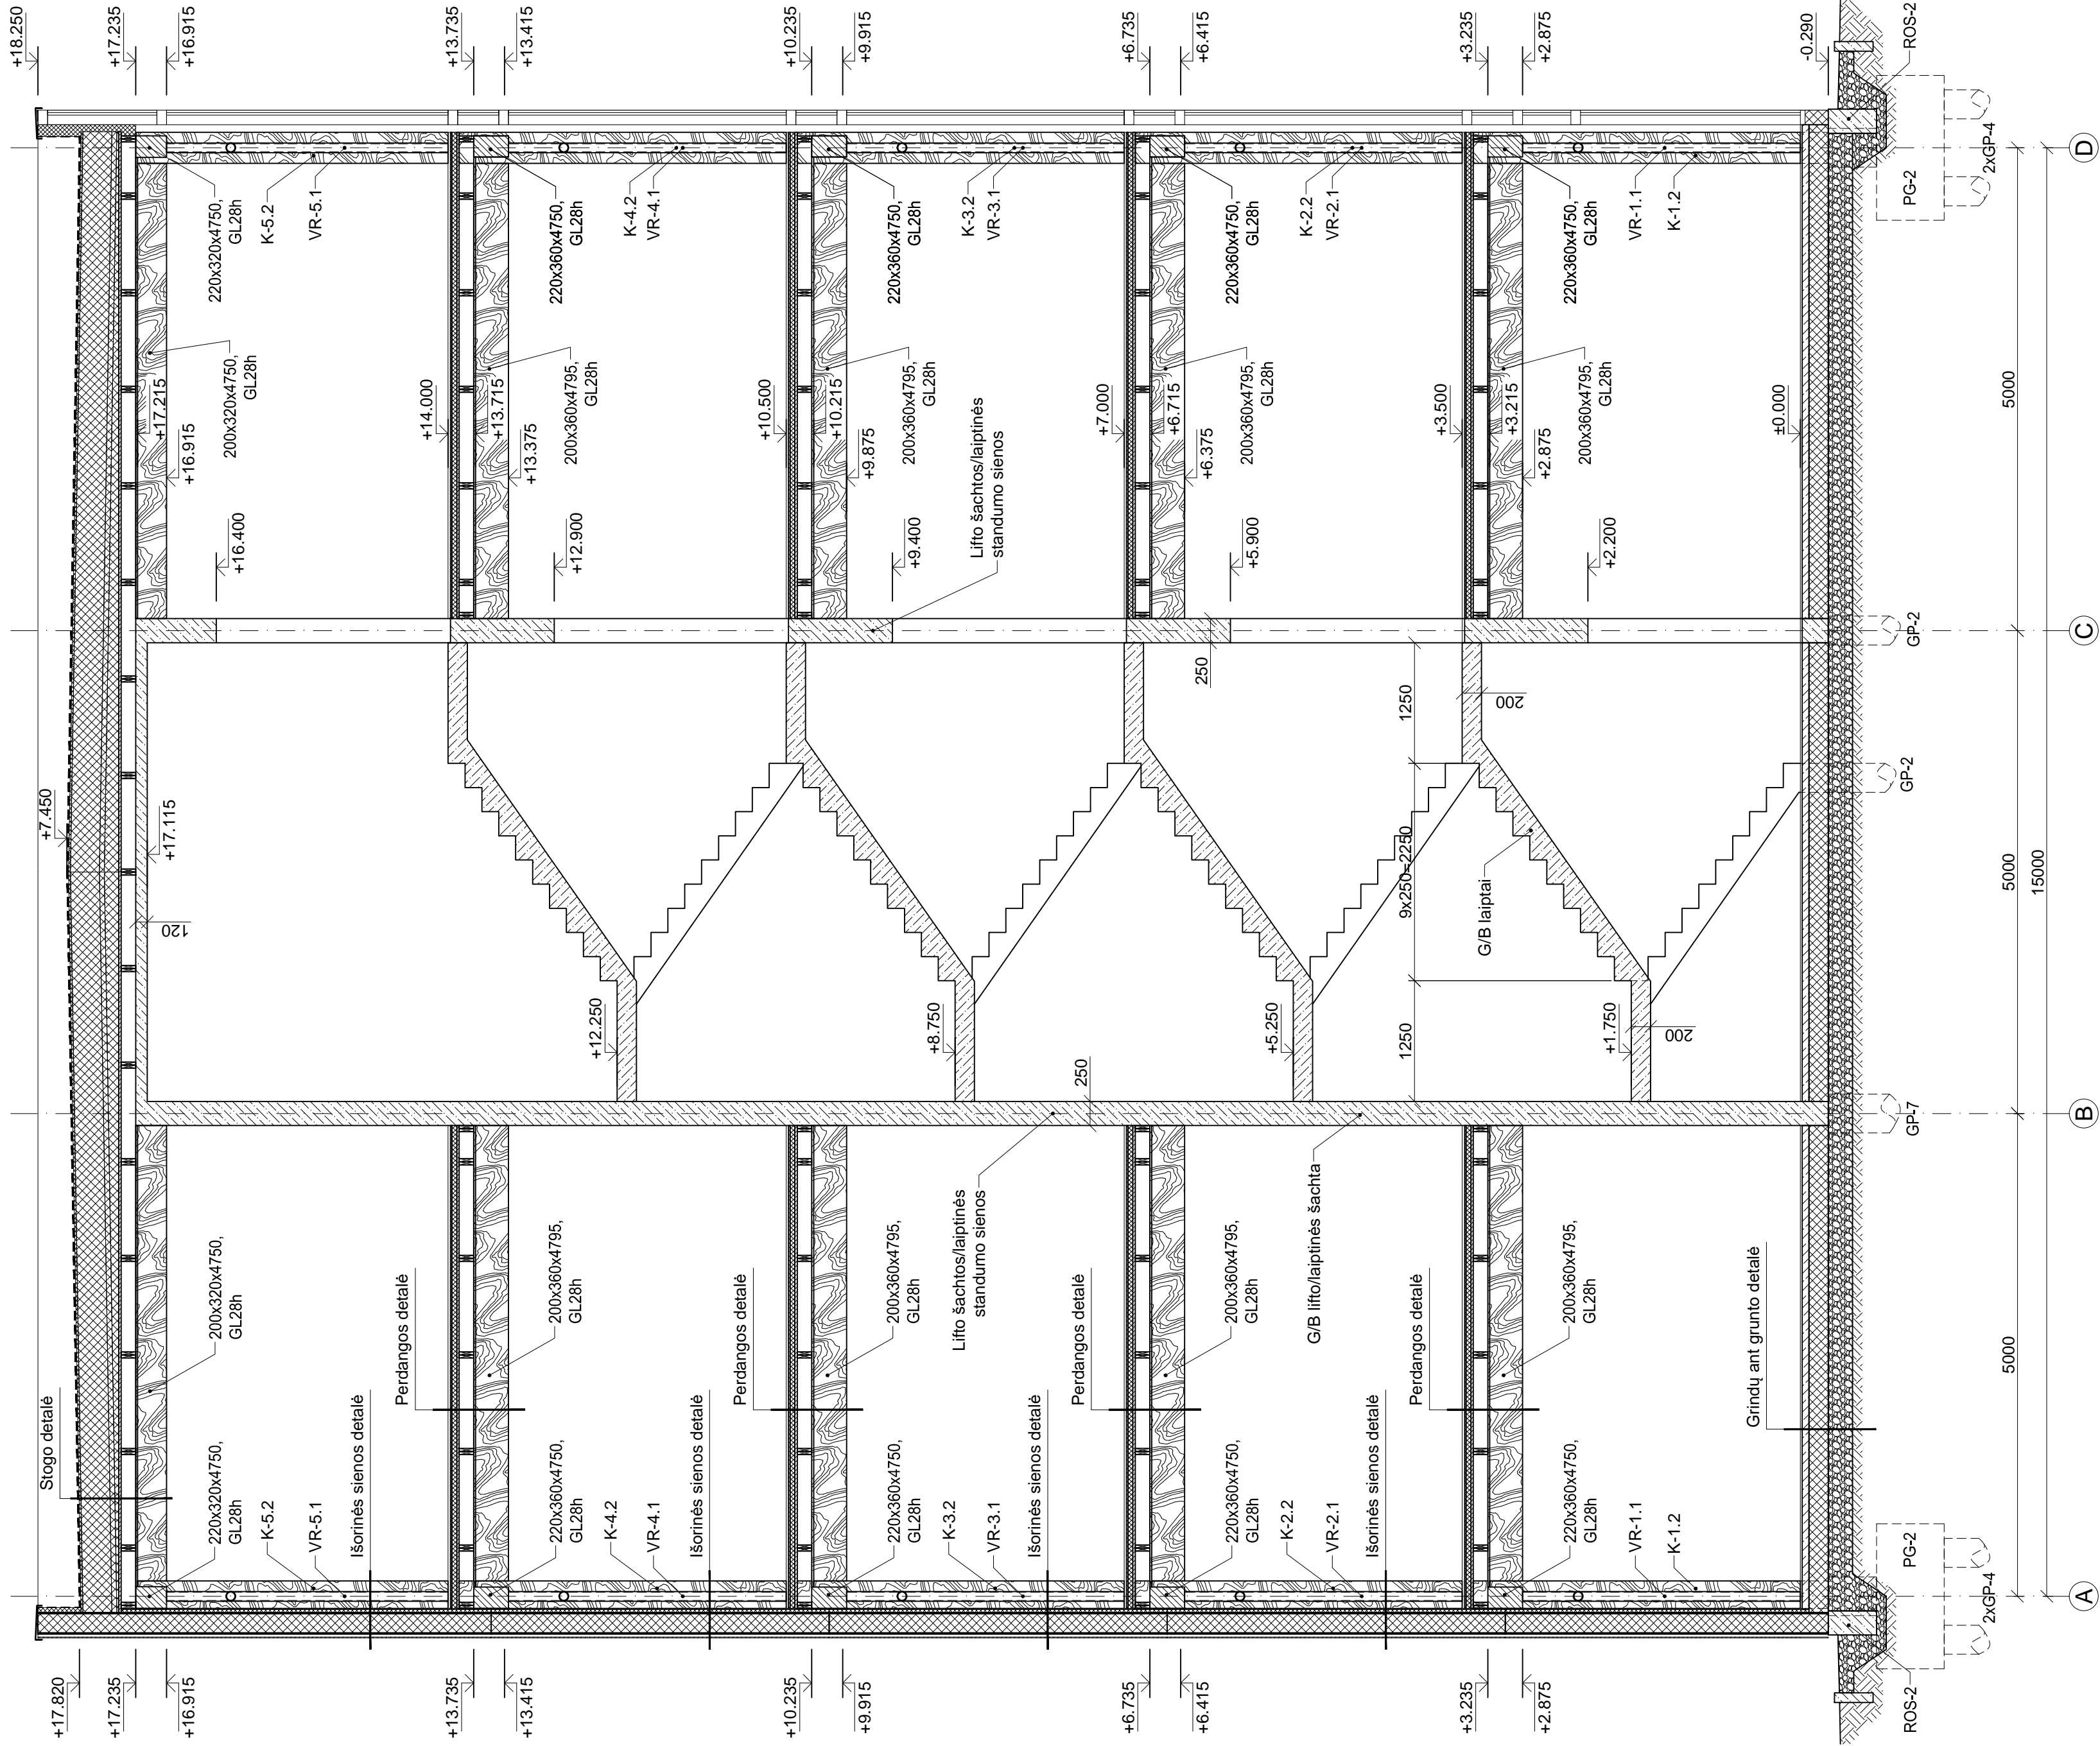

|                             |                                                                                       |                                                                                                                   |                       |  |                      |       |      |
|-----------------------------|---------------------------------------------------------------------------------------|-------------------------------------------------------------------------------------------------------------------|-----------------------|--|----------------------|-------|------|
| K/VAL.<br>PATV.<br>DOK. NR. | 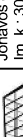 | STATINIO PROJEKTO PAVADINIMAS                                                                                     |                       |  | BREŽINIO ŽYMUO       | LAPAS | LAPŲ |
|                             |                                                                                       | Negyvenamasis 5 aukštų klijotosios medienos konstrukcijų mokslo paskirties pastatas                               |                       |  |                      |       |      |
| 37603                       | PDV                                                                                   | 2018 08                                                                                                           | DOKUMENTO PAVADINIMAS |  | KPRS18/02-TP-SK-4.14 | 1     | 1    |
|                             |                                                                                       |                                                                                                                   | Pjūvis A-A            |  |                      |       |      |
| 37603                       | Konstr.                                                                               | 2018 08                                                                                                           |                       |  |                      |       |      |
| LT                          | UŽSAKOVAS                                                                             | Miškų institutas, Lietuvos agrarinių ir miškų mokslų centro filialas, Liepų g. 1, Girionių k., LT-53101, Kauno r. |                       |  |                      |       |      |



Stogo detalé

+18.250

+7.450

+17.920

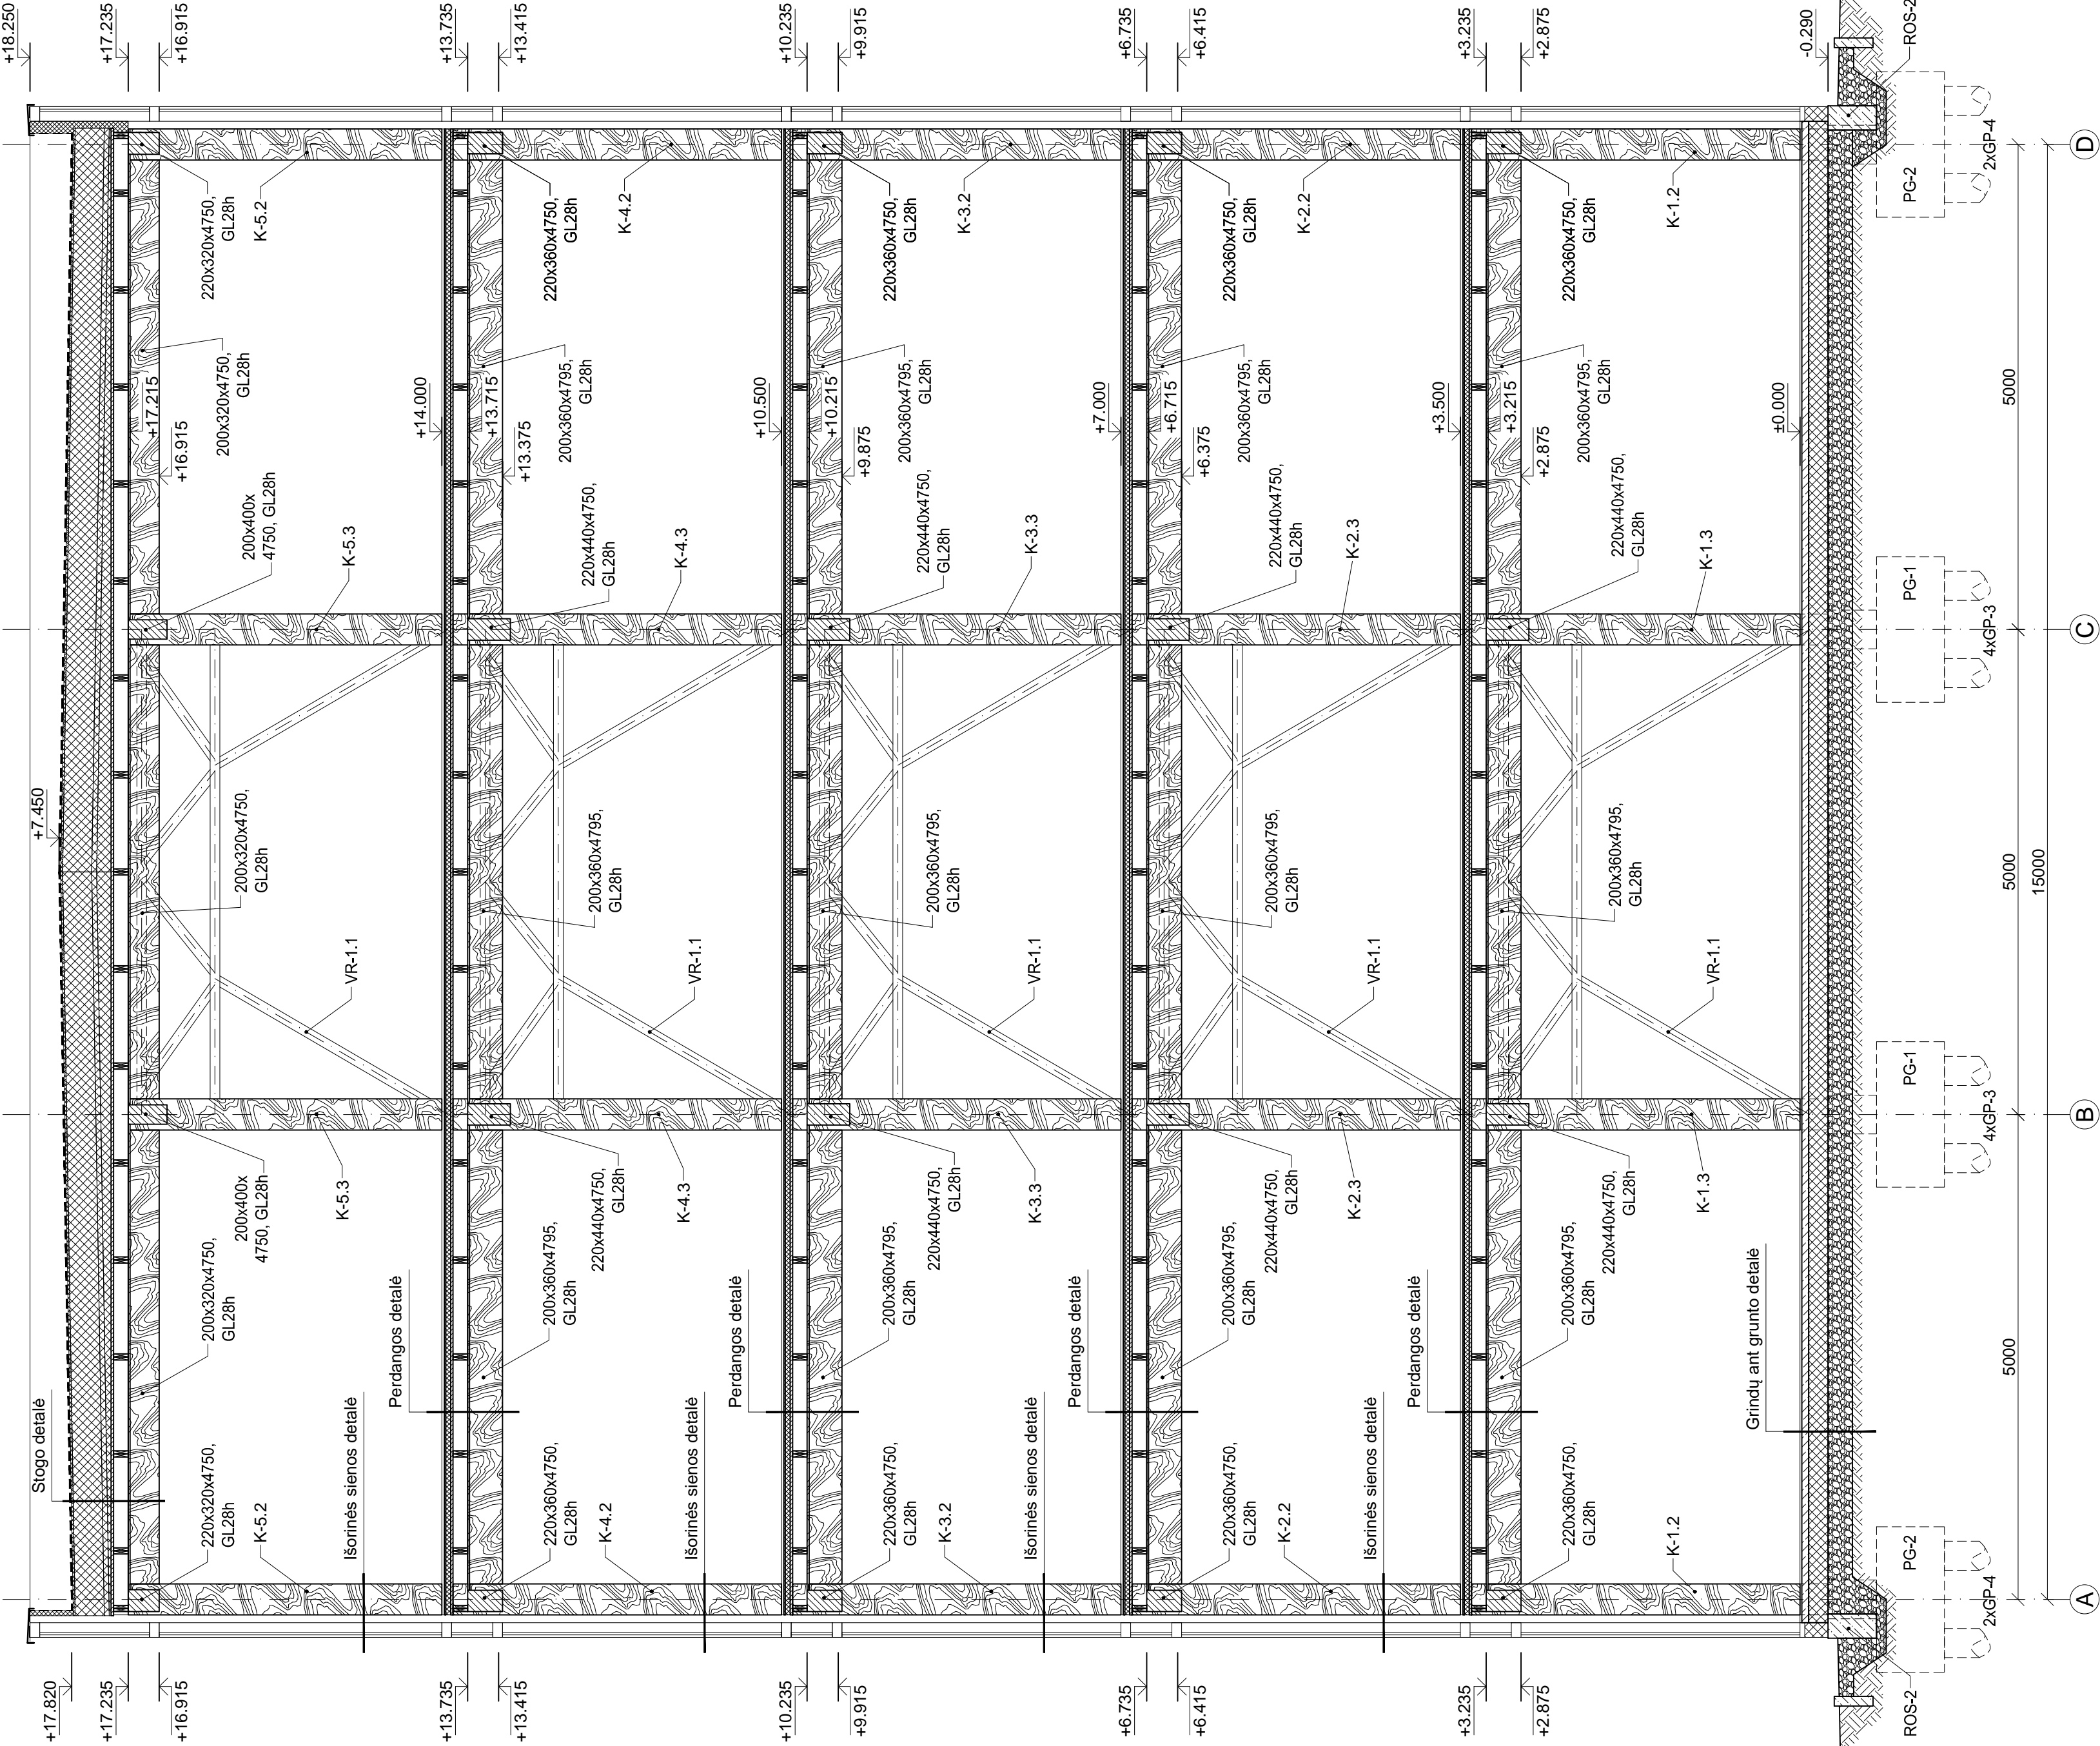

|                             |                                                                                       |                                                                                                                                                                                |                                                                                                                    |                                     |             |
|-----------------------------|---------------------------------------------------------------------------------------|--------------------------------------------------------------------------------------------------------------------------------------------------------------------------------|--------------------------------------------------------------------------------------------------------------------|-------------------------------------|-------------|
| K/VAL.<br>DATY.<br>DOK. NR. | 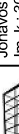 | <b>UAB "Konstrukcijų pasaulis"</b><br>Jonavos g. 280, Kaunas<br>Įm. k.: 304607026498<br>Pdv. k.: 304607026498<br>El. p.: kazimieredz@gmail.com<br>www.konstrukciju-pasaulis.lt | STATINIO PROJEKTO PAVADINIMAS<br>Negyvenamasis 5 aukštų klijoties medienos konstrukcijų mokslo paskirties pastatas | LAIDA                               | O           |
| 37603                       | PDV                                                                                   | Kęstutis Pažereckas                                                                                                                                                            | 2018 08                                                                                                            | DOKUMENTO PAVADINIMAS<br>Plyvis B-B |             |
| 37603                       | Konstr.                                                                               | Kęstutis Pažereckas                                                                                                                                                            | 2018 08                                                                                                            |                                     |             |
| LT                          | UŽSAKOVAS                                                                             | Miški institutas. Lietuvos agrarinio ir miškų mokslų centro filialas. Liepų g. 1, Girionių k., LT-53101, Kauno r.                                                              | BREŽINIO ŽYMUO<br>KPRS18/02-TP-SK-4.15                                                                             | LAPAS                               | LAPŲ<br>1 1 |



# NEEKSPLOATUOJAMO STOGO DETALĖ MASTELIS 1:10

|                                                        |
|--------------------------------------------------------|
| Bituminē / EPDM stogo danga                            |
| Nuolydī formuojantis akm. vatų sluoksnis - 20...150 mm |
| Grąsų vatų šiltinamasis sluoksnis - 300 mm             |
| Karo izoliacinė plėvelė - 1 sl.                        |
| Lentų paklotas - 25 mm                                 |
| Stogo ilginiai 2x(32x150), kas 1000 mm                 |
| Medinės dailylentės - 20 mm                            |
| Laikanti konstrukcija (medinės sijos)                  |

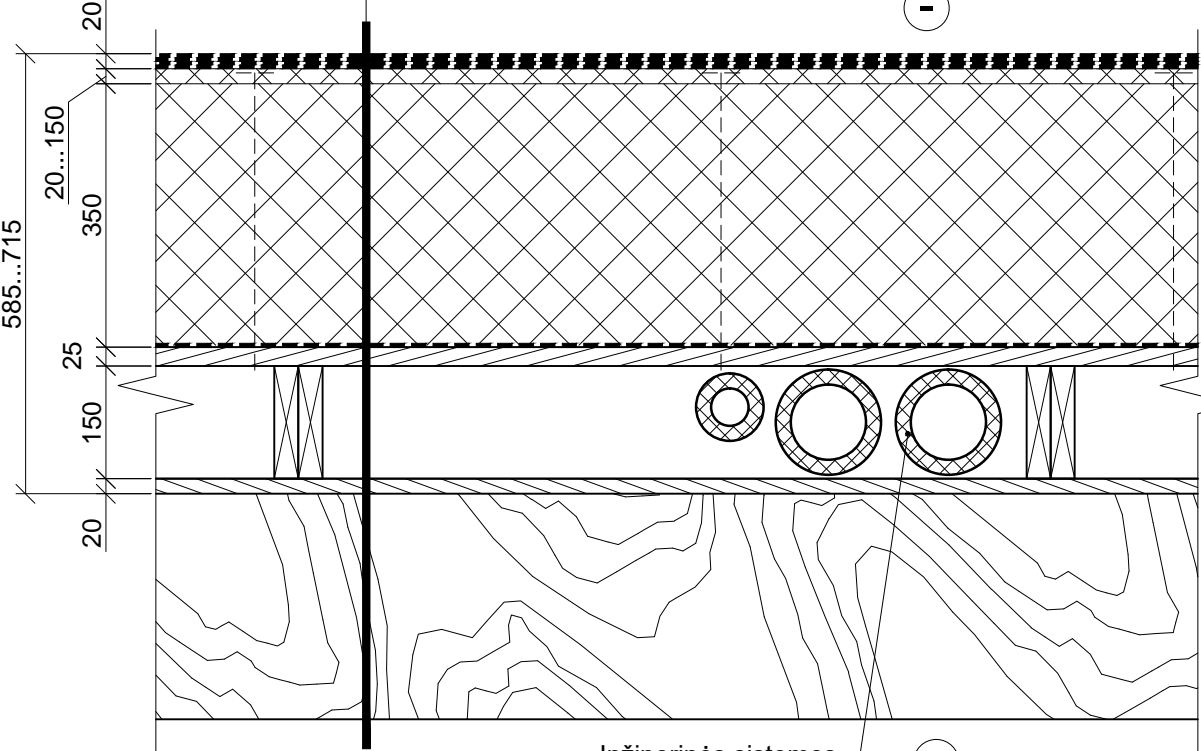

IŠORINĖS SIENOS SKYDC  
DETALĖ MASTELIS 1:10

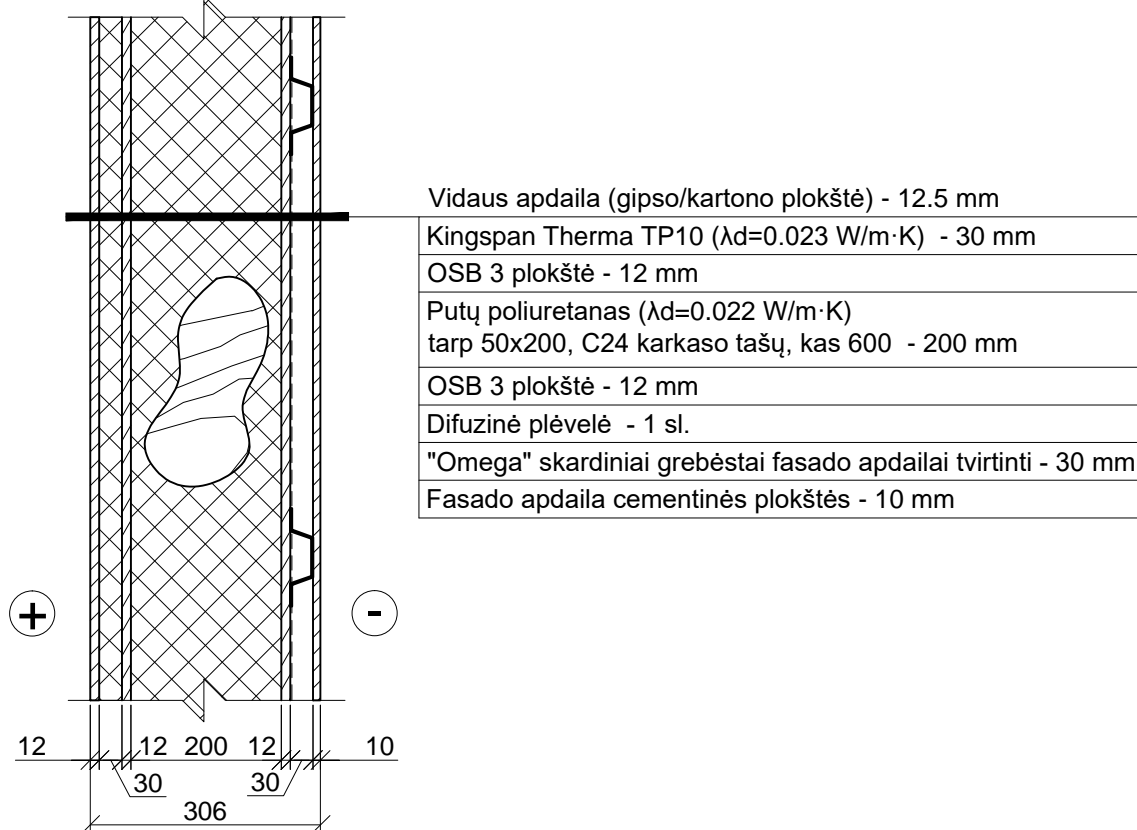

## PERDANGOS DETALĖ MASTELIS 1:1

|                                                 |
|-------------------------------------------------|
| Parкетas/guminė grindų danga - 12mm             |
| Kamštinė medžiaga parketui (parketui) - 8 mm    |
| Hydroizoliacija (drėgnoms patalpoms) - 4 mm     |
| OSB 3 plokštė - 16 mm                           |
| Priešsmūginė akmens vatos plokštė - 50 mm       |
| Lentų paklotas - 25 mm                          |
| Stogo ilginiai 2x(32x150), kas 1000 mm - 150 mm |
| Medinės lubų dailylentės - 20 mm                |
| Laikanti konstrukcija (medinės sijos)           |

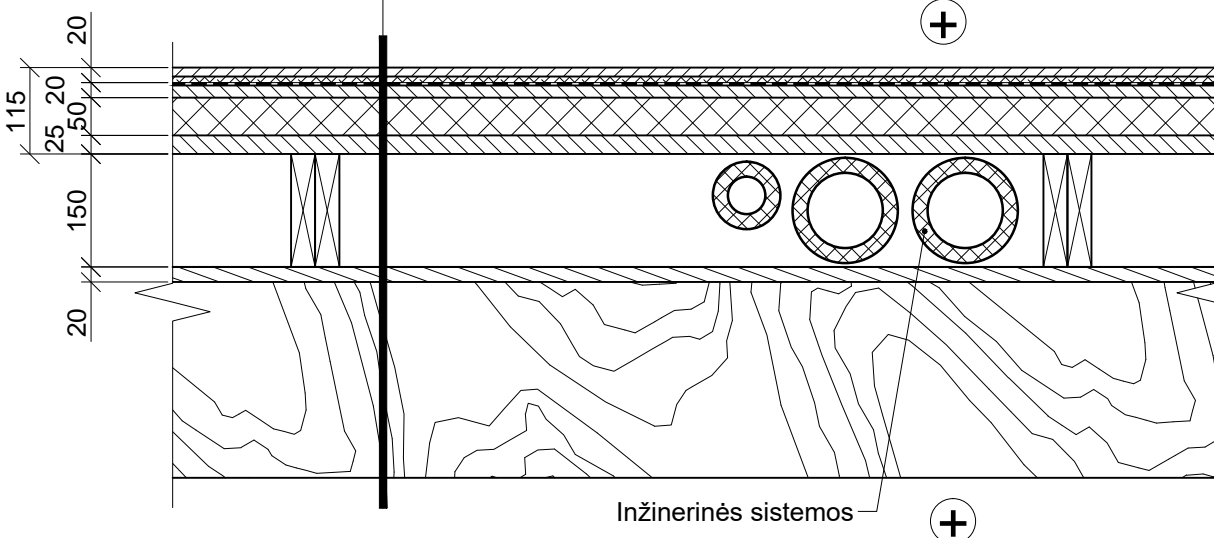

## GRINDŲ ANT GRUNTO DETALĖ MASTELIS 1:10

|                                                       |
|-------------------------------------------------------|
| Grindų danga 20 mm                                    |
| 2 sl. tepinėlis hidroizoliacijos (drėgnoms patalpoms) |
| Armūtas išlyginamas sluoksnis - 70 mm                 |
| Polietileno plėvelė - 200 μm                          |
| Polistireninis putplastis EPS 100 - 200 mm            |
| Hidroizoliacija - 1 sl.                               |
| Sutankintas skaldos sluoksnis (fr.0/32) - 250 mm      |
| Sutankintas vietinis gruntas                          |

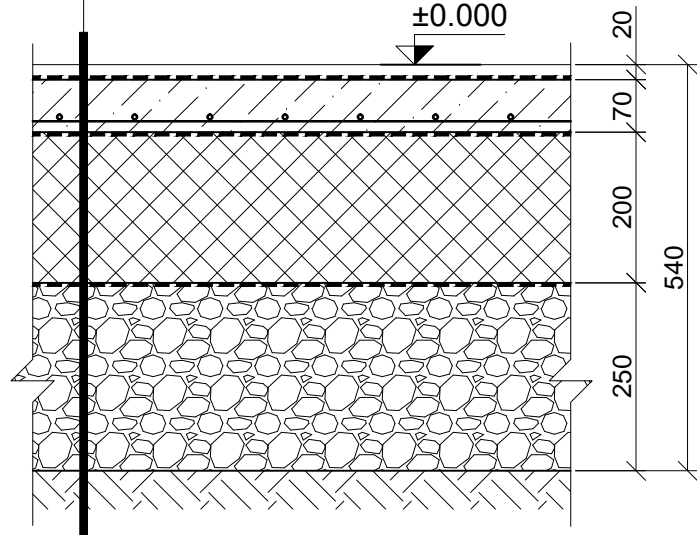

|                            |                                                                                                                                |                                                                                                                                                                               |         |                                                                                                                       |  |            |
|----------------------------|--------------------------------------------------------------------------------------------------------------------------------|-------------------------------------------------------------------------------------------------------------------------------------------------------------------------------|---------|-----------------------------------------------------------------------------------------------------------------------|--|------------|
| KVAL.<br>PATV.<br>DOK. NR. |                                           | <b>UAB "Konstrukcijų pasaulis"</b><br>Jonavos g. 260, Kaunas<br>Įm. k.: 304690224<br>Tel. +370 (61) 980989<br>El. pa.: k.pazereckas@gmail.com<br>www.konstrukciju-pasaulis.lt |         | STATINIO PROJEKTO PAVADINIMAS<br>Negyvenamasis 5 aukštų klijuotosios medienos konstrukcijų mokslo paskirties pastatas |  |            |
| 37603                      | PDV                                                                                                                            | Kęstutis Pažereckas                                                                                                                                                           | 2018 08 | DOKUMENTO PAVADINIMAS                                                                                                 |  | LAIDA      |
| 37603                      | Konstr.                                                                                                                        | Kęstutis Pažereckas                                                                                                                                                           | 2018 08 | Aitvarų detalės                                                                                                       |  | O          |
|                            |                                                                                                                                |                                                                                                                                                                               |         |                                                                                                                       |  |            |
| LT                         | UŽSAKOVAS<br>Mūsų institutas, Lietuvos agrarinių ir miškų mokslų centro filialas, Liepuo a. 1, Girioniu k., LT-53101, Kauno r. |                                                                                                                                                                               |         | BRĖŽINIO ŽYMUO<br>KPRS18/02-TP-SK-4.16                                                                                |  | LAPAS<br>1 |
|                            |                                                                                                                                |                                                                                                                                                                               |         |                                                                                                                       |  | LAPŲ<br>1  |

Technical drawing of a bridge structure showing the layout of reinforcement bars (Mazgas) and their dimensions. The drawing includes labels for reinforcement bars (Mazgas M-1, M-2, M-3, M-4) and their specifications (Ø88.9x5, S355, L=1100, L=1012, L=2573). It also shows the central reinforcement bar (Ø101.6x6, S355, L=4750). Dimensions are given in millimeters (mm) and degrees (°).

Key dimensions and labels:

- Reinforcement bars: Ø88.9x5, S355, L=1100, L=1012, L=2573
- Central reinforcement bar: Ø101.6x6, S355, L=4750
- Labels: Mazgas M-1, Mazgas M-2, Mazgas M-3, Mazgas M-4
- Dimensions: 193, 574, 3111, 2344, 108, 1275, 2200, 4967, 232, 1215, 120, 1040, 111°, 33°, 36°, 60°, 120°, 5214, 108

[illegible]

Technical drawing of a mechanical part (Fig. 1) showing dimensions and material specifications. The part is a rectangular plate with a diagonal slot. Dimensions include overall width 345, overall height 183, slot width 64, slot depth 281, and slot angle 88.9 degrees. Material specifications are S355, 2vnt. and S355.

[illegible][illegible]

Technical drawing of a mechanical part, likely a shaft or pin, showing various dimensions. The drawing includes a central shaft with a threaded section, a flange, and a tapered end. Dimensions are given in millimeters. Key dimensions include: total length 350, flange diameter 120, flange thickness 9, shaft diameter 28, and various other diameters and lengths like 18, 12, 39, 138, 240, 9, 102, 120, 69, 281, 28, 9, 102, 120.

|                            |                                                                                                                   |                                                                                                                                       |         |                     |                                                                                      |                          |  |                      |       |
|----------------------------|-------------------------------------------------------------------------------------------------------------------|---------------------------------------------------------------------------------------------------------------------------------------|---------|---------------------|--------------------------------------------------------------------------------------|--------------------------|--|----------------------|-------|
| KV/L.<br>PATV.<br>DOK. NR. |                              | <b>UAB "Konstrukcijų pasaulis"</b>                                                                                                    |         |                     | STATINIO PROJEKTO PAVADINIMAS                                                        |                          |  |                      |       |
|                            |                                                                                                                   | Jonavos g. 260, Kaunas<br>Įm. k.: 304690224<br>Tel. +370 (613) 98089<br>El.p.: k.pazereckas@gmail.com<br>www.konstrukciju-pasaulis.lt |         |                     | Negyvenamasis 5 aukštų klijuotosios medienos konstrukcijų mokslo paskirties pastatas |                          |  |                      |       |
|                            |                                                                                                                   | 37603                                                                                                                                 | PDV     | Kęstutis Pažereckas | 2018 08                                                                              | DOKUMENTO PAVADINIMAS    |  |                      | LAIDA |
|                            |                                                                                                                   | 37603                                                                                                                                 | Konstr. | Kęstutis Pažereckas | 2018 08                                                                              | Vertikalieji ryšiai VR-1 |  |                      |       |
|                            |                                                                                                                   |                                                                                                                                       |         |                     |                                                                                      |                          |  |                      | O     |
| LT                         | UŽSAKOVAS                                                                                                         |                                                                                                                                       |         |                     | BRĖŽINIO ŽYMUO                                                                       |                          |  | LAPAS                | LAPŲ  |
|                            | Miškų institutas, Lietuvos agrarinių ir miškų mokslų centro filialas. Liepų g. 1, Girionių k., LT-53101, Kauno r. |                                                                                                                                       |         |                     |                                                                                      |                          |  | KPRS18/02-TP-SK-4.17 | 1     |



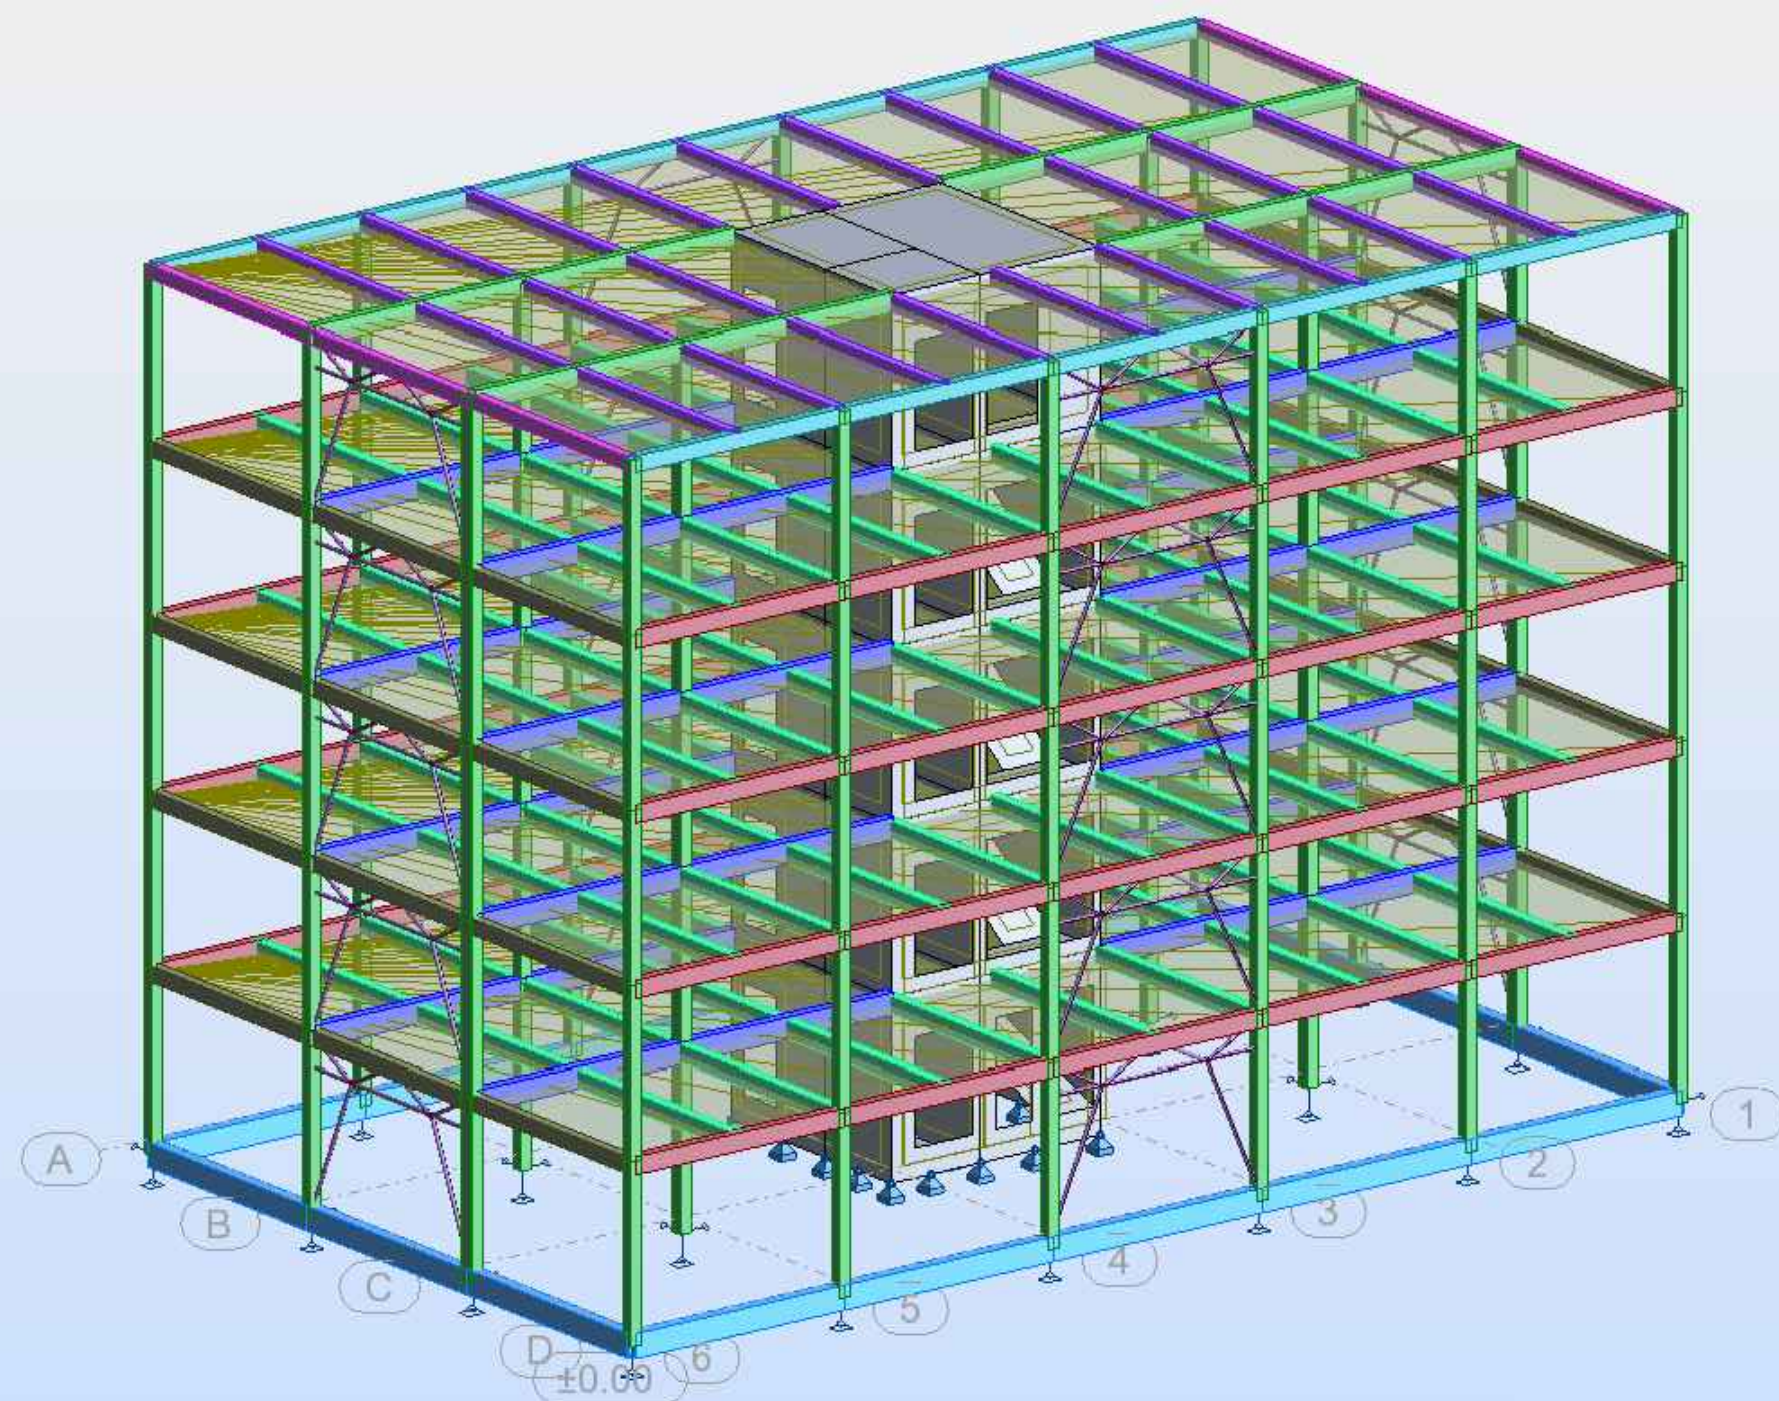

- K25x25
- PSPS220x360
- PSPV220x440
- PSSG220x320
- PSSV200x360
- Per\_20
- Plokste25
- ROS250x500
- SSPS220x320
- SSPV200x400
- SSSG220x280
- SSSV200x320
- Siena\_25
- TRON 88x5

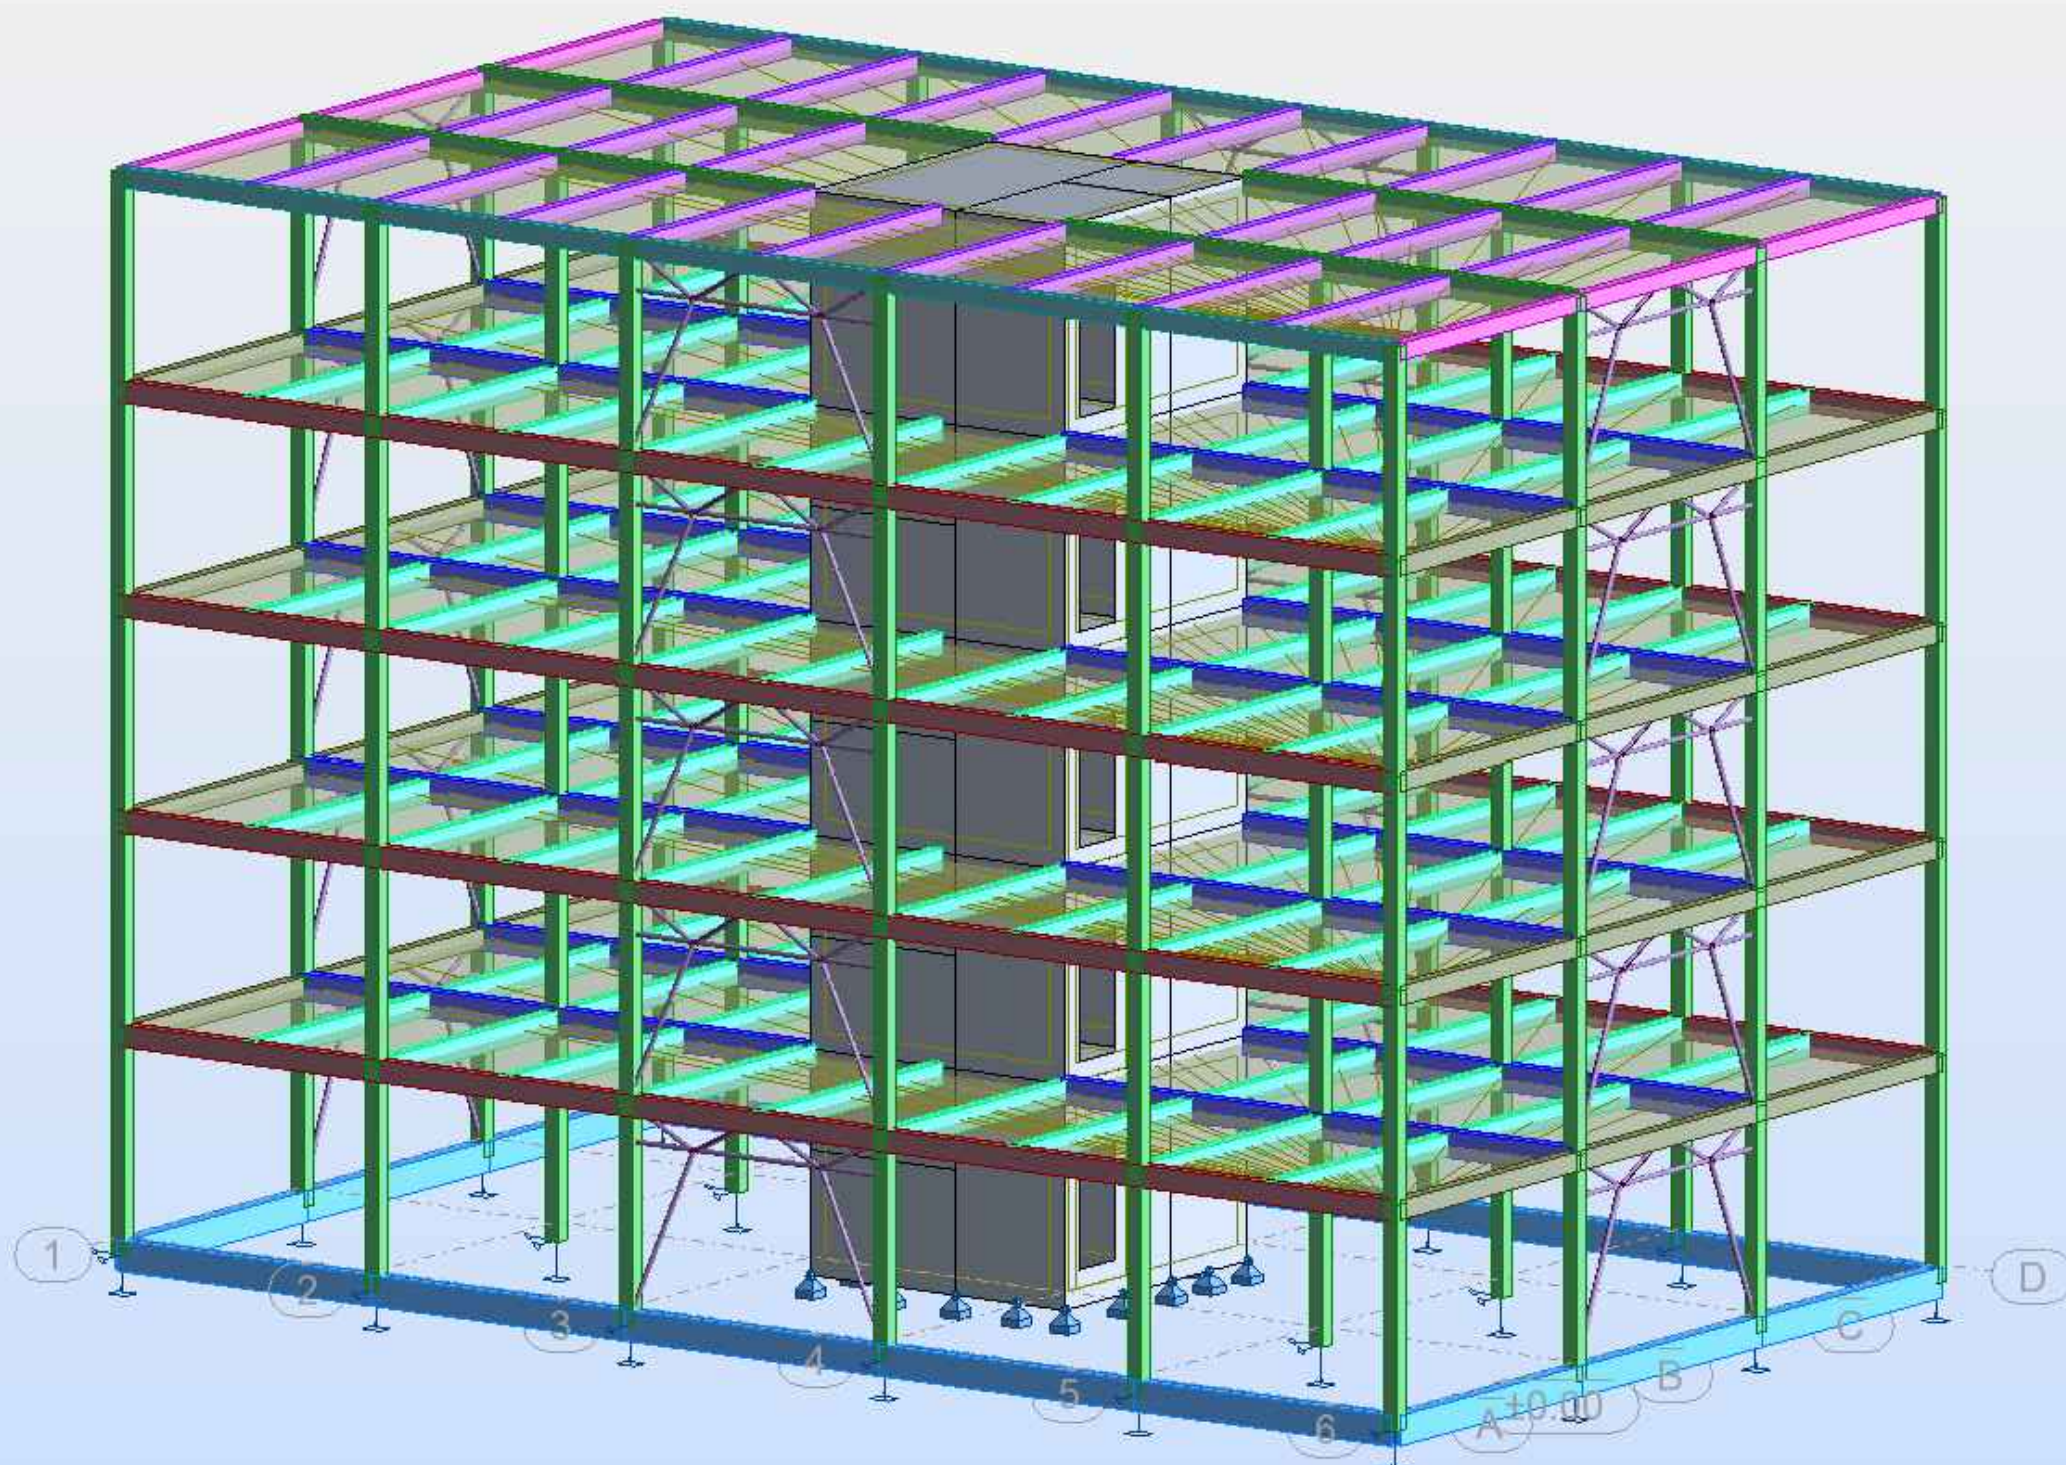

- K25x25
- PSPS220x360
- PSPV220x440
- PSSG220x320
- PSSV200x360
- Per\_20
- Plokste25
- ROS250x500
- SSPS220x320
- SSPV200x400
- SSSG220x280
- SSSV200x320
- Siena\_25
- TRON 88x5

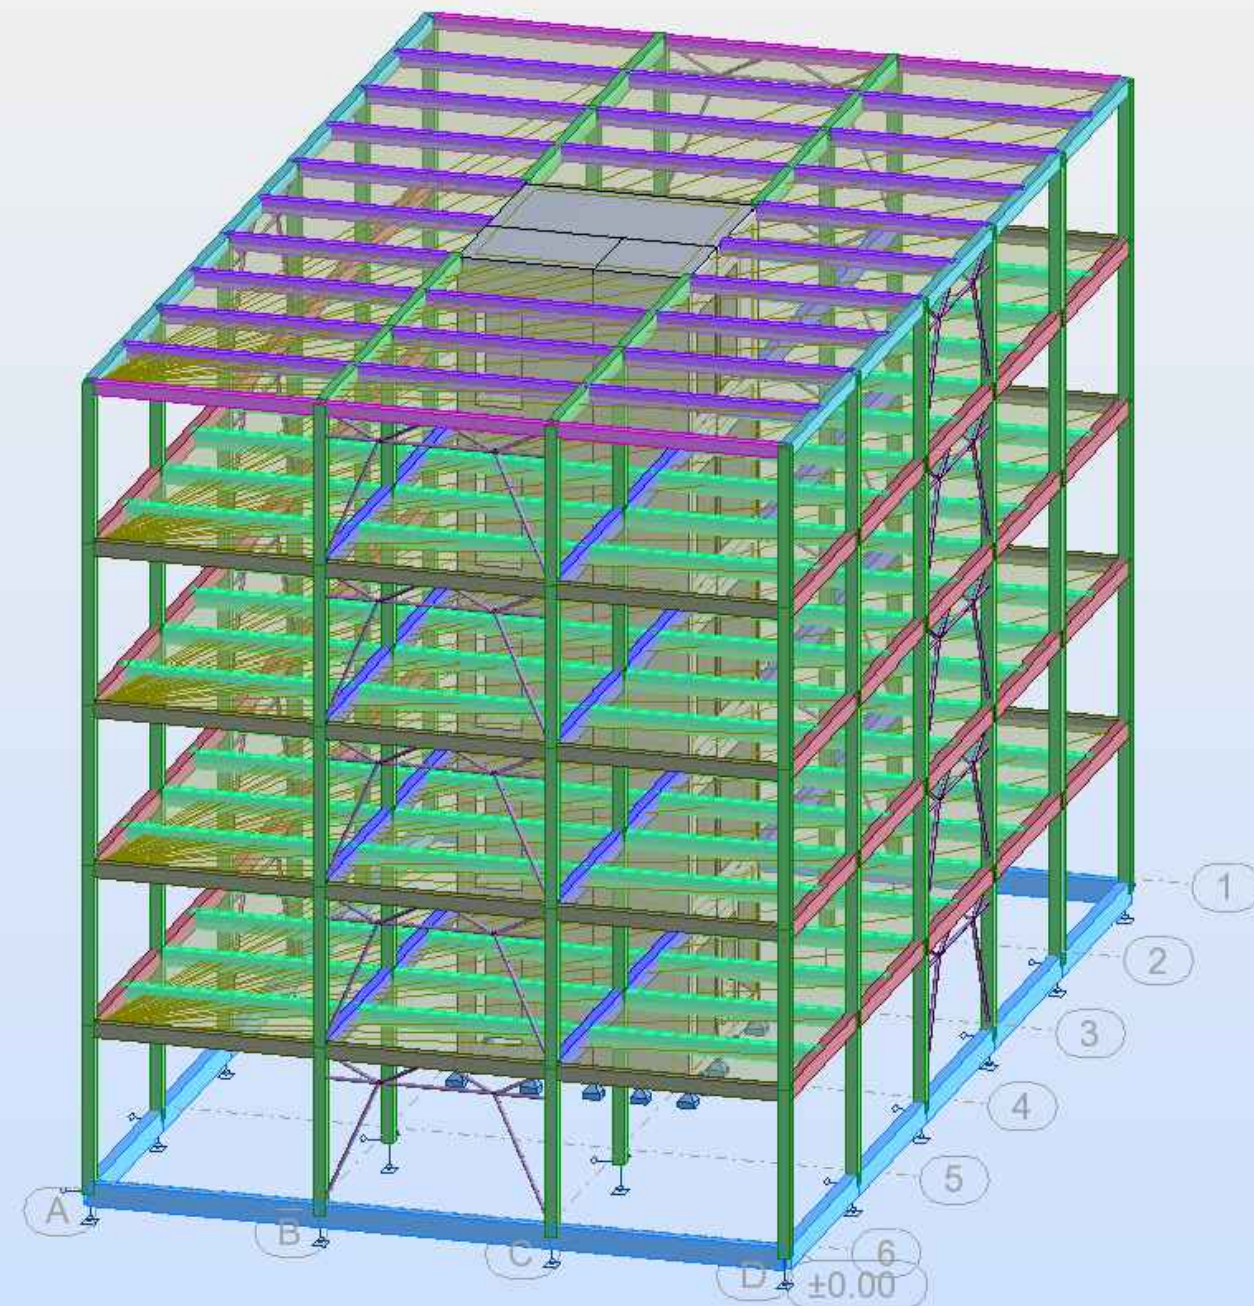

- K25x25
- PSPS220x360
- PSPV220x440
- PSSG220x320
- PSSV200x360
- Per\_20
- Plokste25
- ROS250x500
- SSPS220x320
- SSPV200x400
- SSSG220x280
- SSSV200x320
- Siena\_25
- TRON 88x5

|                            |                                                                                                                   |                                                                                                                                       |         |                                                                                      |         |                                      |       |       |
|----------------------------|-------------------------------------------------------------------------------------------------------------------|---------------------------------------------------------------------------------------------------------------------------------------|---------|--------------------------------------------------------------------------------------|---------|--------------------------------------|-------|-------|
| KVAL.<br>PATV.<br>DOK. NR. |                              | UAB "Konstrukcijų pasaulis"                                                                                                           |         | STATINIO PROJEKTO PAVADINIMAS                                                        |         |                                      |       |       |
|                            |                                                                                                                   | Jonavos g. 260, Kaunas<br>Įm. k.: 304690224<br>Tel. +370 (613) 98089<br>El.p.: k.pazereckas@gmail.com<br>www.konstrukciju-pasaulis.lt |         | Negyvenamasis 5 aukštų klijuotosios medienos konstrukcijų mokslo paskirties pastatas |         |                                      |       |       |
|                            |                                                                                                                   | 37603                                                                                                                                 | PDV     | Kęstutis Pažereckas                                                                  | 2018 08 | DOKUMENTO PAVADINIMAS                |       | LAIDA |
|                            |                                                                                                                   | 37603                                                                                                                                 | Konstr. | Kęstutis Pažereckas                                                                  | 2018 08 | Konstrukcinio modelio vizualizacijos |       | O     |
| LT                         | UŽSAKOVAS                                                                                                         |                                                                                                                                       |         | BRĖŽINIO ŽYMUO                                                                       |         |                                      | LAPAS | LAPŲ  |
|                            | Miškų institutas, Lietuvos agrarinių ir miškų mokslų centro filialas, Liepų g. 1, Girionių k., LT-53101, Kauno r. |                                                                                                                                       |         | KPRS18/02-TP-SK-4.18                                                                 |         |                                      | 1     | 1     |
